# Supplementary material for: GenomePAM directs PAM characterization and engineering of CRISPR-Cas nucleases using mammalian genome repeats
Source: Nat Biomed Eng. 2025 Aug 13;10(2):231–44. doi: 10.1038/s41551-025-01464-y (PMC12812445; doi:10.1038/s41551-025-01464-y)
Supplement: Supplementary file 4 — Supplementary Tables 1–3 and 7–9. [file 41551_2025_1464_MOESM4_ESM.xlsx]

## Sheet: Tab_S1_SpCas9_Rep-1_PAM
#BED_Chromosome	WindowChromosome	bi.sum.mi	BED_Site_Chromosome	Site_SubstitutionsOnly.Sequence	Site_SubstitutionsOnly.NumSubstitutions	Site_SubstitutionsOnly.Start	Site_SubstitutionsOnly.End	TargetSequence
chr13	chr13	426	chr13	ATGAGCCACTGTGCCTAGCCGGGAGAAGAG	2	80238314	80238344	GTGAGCCACTGTGCCTGGCCNNNNNNNN
chr13	chr13	360	chr13	GGGAGCCACTGTGCCTGGCCTGGCTTTACT	1	62346699	62346729	GTGAGCCACTGTGCCTGGCCNNNNNNNN
chr13	chr13	331	chr13	GTGAGCCACTGTGCCTGGCCAGGTGGAGTA	0	92003018	92003048	GTGAGCCACTGTGCCTGGCCNNNNNNNN
chr1	chr1	306	chr1	GTGAGCCACTGTGCCTGGCCTGGTACAAGG	0	228191729	228191759	GTGAGCCACTGTGCCTGGCCNNNNNNNN
chr17	chr17	297	chr17	GTGAGCCACCGTGCCTGGCCAGGAAACTTC	1	58990882	58990912	GTGAGCCACTGTGCCTGGCCNNNNNNNN
chr9	chr9	289	chr9	GTGAGCCACTGTGCCTGGCCTGGGTTACCA	0	113445477	113445507	GTGAGCCACTGTGCCTGGCCNNNNNNNN
chr13	chr13	288	chr13	GTGAGCCACCATGCCTGGCCTGGCATGTGA	2	76201264	76201294	GTGAGCCACTGTGCCTGGCCNNNNNNNN
chr13	chr13	287	chr13	GTGAGCCACCGTGCCTGGCCAGGGGCAACT	1	81276885	81276915	GTGAGCCACTGTGCCTGGCCNNNNNNNN
chr13	chr13	283	chr13	TTGAGCCACTGCGCCTGGCCGGGCTCTTTC	2	61982506	61982536	GTGAGCCACTGTGCCTGGCCNNNNNNNN
chr17	chr17	279	chr17	ATGAGCCACAGTGCCTGGCCGGGAGTGCTG	2	21817958	21817988	GTGAGCCACTGTGCCTGGCCNNNNNNNN
chr13	chr13	277	chr13	GTGAGCCACCATGCCTGGCCTGGGTTTTAT	2	75646864	75646894	GTGAGCCACTGTGCCTGGCCNNNNNNNN
chr1	chr1	277	chr1	GTGAGCCACTGTGCCTGGCCAGGCCACACA	0	223816867	223816897	GTGAGCCACTGTGCCTGGCCNNNNNNNN
chr5	chr5	273	chr5	GTGAGCCACTGTGCCTGGCCTGGAATTGAT	0	13842087	13842117	GTGAGCCACTGTGCCTGGCCNNNNNNNN
chr1	chr1	271	chr1	GTGAGCCACTGTGCCAGGCCAGGCCCATAT	u	226304906	226304936	GTGAGCCACTGTGCCTGGCCNNNNNNNN
chr22	chr22	270	chr22	GTGAGCCACTGTGCCTGGCCAGGTGGGCCA	0	18018899	18018929	GTGAGCCACTGTGCCTGGCCNNNNNNNN
chr7	chr7	262	chr7	GTGAGTCACTGTGCCTGGCCTGGATATTAA	1	2564302	2564332	GTGAGCCACTGTGCCTGGCCNNNNNNNN
chr13	chr13	260	chr13	GTGAGCCACTGTGCCTGGCCTGGGCAGAAA	0	69978766	69978796	GTGAGCCACTGTGCCTGGCCNNNNNNNN
chr7	chr7	259	chr7	GTGAGCCACTGTGCCTGGCCAGGACTCTTA	0	107949939	107949969	GTGAGCCACTGTGCCTGGCCNNNNNNNN
chr1	chr1	257	chr1	ATGAGCCACTGTGCCTGGCCTGGAAGATTT	1	242551912	242551942	GTGAGCCACTGTGCCTGGCCNNNNNNNN
chr1	chr1	256	chr1	GTGAGCCACTGTGCCTGGCCTGGTCAAATA	0	227359567	227359597	GTGAGCCACTGTGCCTGGCCNNNNNNNN
chr2	chr2	255	chr2	GTGAGCCACTGTGCCTGGCCTGGGTTGTCT	0	99342913	99342943	GTGAGCCACTGTGCCTGGCCNNNNNNNN
chr12	chr12	254	chr12	GTGAGCCACTGTGCCTGGACAGGAATGCAT	1	110891358	110891388	GTGAGCCACTGTGCCTGGCCNNNNNNNN
chr1	chr1	253	chr1	GTGAGCCACTGTGCCTGGCCAGGAATGCAG	0	109245120	109245150	GTGAGCCACTGTGCCTGGCCNNNNNNNN
chr17	chr17	250	chr17	GTGAGCCACCGTGCCTGGCCTGGACTCTCT	1	57083141	57083171	GTGAGCCACTGTGCCTGGCCNNNNNNNN
chr5	chr5	243	chr5	GTGAGCCACTGTGCCTGGCCTGGAGTCACT	0	126488256	126488286	GTGAGCCACTGTGCCTGGCCNNNNNNNN
chr1	chr1	242	chr1	GTGAGCCACTGTGCCTGGCCTGGATCCTGC	0	147392669	147392699	GTGAGCCACTGTGCCTGGCCNNNNNNNN
chr10	chr10	240	chr10	GTGAGCCACCATGCCTGGCCTGGGTTTAAT	2	110148783	110148813	GTGAGCCACTGTGCCTGGCCNNNNNNNN
chr1	chr1	238	chr1	GTGAGCCACAGTGCCTGGCCCGGACTTCTT	1	155265274	155265304	GTGAGCCACTGTGCCTGGCCNNNNNNNN
chr13	chr13	235	chr13	GTGAGCCACTGTGCCCAGCCAGGATGAAAA	2	61999431	61999461	GTGAGCCACTGTGCCTGGCCNNNNNNNN
chr15	chr15	234	chr15	GTGAGCCACAGTGCCTGGCCAGGAAATACT	1	73725381	73725411	GTGAGCCACTGTGCCTGGCCNNNNNNNN
chr1	chr1	234	chr1	GTGAGCCACTGTGCCTGGCCAGGATGACCT	0	244968390	244968420	GTGAGCCACTGTGCCTGGCCNNNNNNNN
chr15	chr15	233	chr15	GTGAGCCACTGCGCCTGGCCTGGCCTTGGC	1	68240305	68240335	GTGAGCCACTGTGCCTGGCCNNNNNNNN
chr17	chr17	230	chr17	ATGAGCCACCGTGCCTGGCCTGGAATGGTA	2	68817078	68817108	GTGAGCCACTGTGCCTGGCCNNNNNNNN
chr17	chr17	230	chr17	ATGAGCCACTGTACCTGGCCGGGGTTAAGA	2	50650773	50650803	GTGAGCCACTGTGCCTGGCCNNNNNNNN
chr1	chr1	229	chr1	ATGAGCCACTGTGCCTGGCCAGGATGATTG	1	62086093	62086123	GTGAGCCACTGTGCCTGGCCNNNNNNNN
chrUn_GL000224v1	chrUn_GL000224v1	226	chrUn_GL000224v1	GTGAGCCACTGTGCCTGGCCTGGAATTTTT	0	28611	28641	GTGAGCCACTGTGCCTGGCCNNNNNNNN
chr13	chr13	226	chr13	ATGAGCCACCATGCCTGGCCTGGCTTCCTT	3	74377574	74377604	GTGAGCCACTGTGCCTGGCCNNNNNNNN
chr1	chr1	225	chr1	GTGAGCCACTGTGCCTGGCCGGGTATCATG	0	63801574	63801604	GTGAGCCACTGTGCCTGGCCNNNNNNNN
chr16	chr16	224	chr16	ATGAGCCACTGCACCTGGCCAGGGGTTGAG	3	30796455	30796485	GTGAGCCACTGTGCCTGGCCNNNNNNNN
chr1	chr1	224	chr1	GTGAGCCACCGTGCCTGGCCAGGAACACCT	1	29092371	29092401	GTGAGCCACTGTGCCTGGCCNNNNNNNN
chr22	chr22	221	chr22	GTGAGCCACCGTGCCTGGCCAGGATGTGCC	1	21656083	21656113	GTGAGCCACTGTGCCTGGCCNNNNNNNN
chr6	chr6	218	chr6	ATGAGCCACTGCGCCTGGCCAGGAGTTTGG	2	125989394	125989424	GTGAGCCACTGTGCCTGGCCNNNNNNNN
chr17	chr17	218	chr17	GTGAGCCACTGTGCCTGGCCAGGAAGCCAA	0	74162385	74162415	GTGAGCCACTGTGCCTGGCCNNNNNNNN
chr22	chr22	215	chr22	GTGAGCCACTGTGCCCGGCCAGGGTGGTCT	1	17403967	17403997	GTGAGCCACTGTGCCTGGCCNNNNNNNN
chr1	chr1	215	chr1	ATGAGCCACTGTGCCTGGCTAGGTTTGTTT	2	99558520	99558550	GTGAGCCACTGTGCCTGGCCNNNNNNNN
chr17	chr17	215	chr17	ATGAGCCACTGTGCCTGGCTGGGCATGTGT	2	74965626	74965656	GTGAGCCACTGTGCCTGGCCNNNNNNNN
chr1	chr1	215	chr1	GTGAGCCACTGTGCCTGGCCTGGGTTTTTT	0	155314755	155314785	GTGAGCCACTGTGCCTGGCCNNNNNNNN
chr9	chr9	213	chr9	ATGAGCCACTGTGCCTAGCCAGGTCAAGAT	2	19249937	19249967	GTGAGCCACTGTGCCTGGCCNNNNNNNN
chr1	chr1	212	chr1	GTGAGCCACTGCACCTGGCCTGGGTAAAGC	2	225993319	225993349	GTGAGCCACTGTGCCTGGCCNNNNNNNN
chr12	chr12	211	chr12	GTGAGCCACTGTGCCTGGCCAGGGATACAT	0	61982460	61982490	GTGAGCCACTGTGCCTGGCCNNNNNNNN
chr1	chr1	211	chr1	ATGAGCCACTGTACCTGGCCTGGTCTTTTA	2	226617861	226617891	GTGAGCCACTGTGCCTGGCCNNNNNNNN
chr1	chr1	210	chr1	GTGAGCCACTGTGCCTGGCCGGGAGATGCA	0	30829429	30829459	GTGAGCCACTGTGCCTGGCCNNNNNNNN
chr10	chr10	207	chr10	GTGAGCCACTGCGCCTGGCCTGGTGCCTGC	1	13563469	13563499	GTGAGCCACTGTGCCTGGCCNNNNNNNN
chr13	chr13	206	chr13	ATGAGCCACTGCGCCTGGCCAGGGCTATGA	2	80347502	80347532	GTGAGCCACTGTGCCTGGCCNNNNNNNN
chr1	chr1	206	chr1	GTGAGCCACTGTGCCTGGCCTGGATTGTTA	0	100288073	100288103	GTGAGCCACTGTGCCTGGCCNNNNNNNN
chr19	chr19	205	chr19	TTGAGCCACTGTGCCTGGCCAGGTTGCTCA	1	16475970	16476000	GTGAGCCACTGTGCCTGGCCNNNNNNNN
chr22	chr22	204	chr22	GTGAGCCACTGTGCCTGGCCCGGAGTTGGC	0	19867813	19867843	GTGAGCCACTGTGCCTGGCCNNNNNNNN
chrX	chrX	203	chrX	ATGAGCCACCGTGCCTGGCCAGGAGACGAG	2	53398947	53398977	GTGAGCCACTGTGCCTGGCCNNNNNNNN
chr17	chr17	203	chr17	GTGAGCCACTGTGCCTGGCCAGGAGCAGTT	0	76760809	76760839	GTGAGCCACTGTGCCTGGCCNNNNNNNN
chr13	chr13	203	chr13	GTGAGCCACTGTGCCTGGCTTGGCATAGAC	1	67247048	67247078	GTGAGCCACTGTGCCTGGCCNNNNNNNN
chr12	chr12	203	chr12	GTGAGCCACTGTGCCTGGCCGGGATACTGT	0	120969745	120969775	GTGAGCCACTGTGCCTGGCCNNNNNNNN
chr10	chr10	203	chr10	GTGAGCCACTGTGCCTGGCCTGGTTTCCTT	0	73959296	73959326	GTGAGCCACTGTGCCTGGCCNNNNNNNN
chr7	chr7	200	chr7	GTGAGCCACTGTGCCTGGTCAGGAACCACC	1	151635230	151635260	GTGAGCCACTGTGCCTGGCCNNNNNNNN
chr1	chr1	200	chr1	ATGAGCCACTGTGCCTGGCCTGGTATATAA	1	210421724	210421754	GTGAGCCACTGTGCCTGGCCNNNNNNNN
chr7	chr7	199	chr7	GTGAGCCACGGTGCCTGGCCTGGAAAGAGG	1	75662768	75662798	GTGAGCCACTGTGCCTGGCCNNNNNNNN
chr17	chr17	199	chr17	ATGAGCCACTGCGCCTGGCCTGGATTCCAG	2	20121608	20121638	GTGAGCCACTGTGCCTGGCCNNNNNNNN
chr1	chr1	199	chr1	GTGAGCCACAGTGCCTGGCCTGGCCTTATC	1	28645678	28645708	GTGAGCCACTGTGCCTGGCCNNNNNNNN
chr1	chr1	199	chr1	GTGAGCCACTGCGCCTGGCCAGGGTTGTTT	1	211203367	211203397	GTGAGCCACTGTGCCTGGCCNNNNNNNN
chr8	chr8	198	chr8	GTGAGCCACTATGCCTGGCCAGGTTTAGGA	1	115547938	115547968	GTGAGCCACTGTGCCTGGCCNNNNNNNN
chr20	chr20	197	chr20	GTGAGCCACTGTGCCTAGCCTGGATTTCCG	1	37320676	37320706	GTGAGCCACTGTGCCTGGCCNNNNNNNN
chr6	chr6	196	chr6	ATGAGCCACCATGCCTGGCCAGATTTACAA	3	149389353	149389383	GTGAGCCACTGTGCCTGGCCNNNNNNNN
chr17	chr17	196	chr17	GTGAACCACTGTGCCTGGCCAGGCCCCACC	1	68010189	68010219	GTGAGCCACTGTGCCTGGCCNNNNNNNN
chr9	chr9	195	chr9	GTGAGCCACTGTGCCTGGCCAGGCTCCTTT	0	21829508	21829538	GTGAGCCACTGTGCCTGGCCNNNNNNNN
chr7	chr7	195	chr7	GTGAGCCACTGTGCCTGGCTAGGATAATGT	1	152593817	152593847	GTGAGCCACTGTGCCTGGCCNNNNNNNN
chr13	chr13	195	chr13	GTGAGCCACTGCACCTGGCCTGGAGATAAG	2	75384130	75384160	GTGAGCCACTGTGCCTGGCCNNNNNNNN
chr1	chr1	194	chr1	ATGAGCCACTGTGCCTGGCCTGGTTTCACT	1	102375413	102375443	GTGAGCCACTGTGCCTGGCCNNNNNNNN
chr9	chr9	193	chr9	ATGAGCCACTGTGCCTGGCCTGGTTTTCTT	1	89272478	89272508	GTGAGCCACTGTGCCTGGCCNNNNNNNN
chr7	chr7	193	chr7	GTGAGCCACTGTGCCTGGCCAGGGTTGATA	0	77508030	77508060	GTGAGCCACTGTGCCTGGCCNNNNNNNN
chr5	chr5	193	chr5	GTGAGCCACTGTGCCTGGCCTGGTCTATCA	0	66104084	66104114	GTGAGCCACTGTGCCTGGCCNNNNNNNN
chr17	chr17	193	chr17	ATGAGCCACTGAGCCTGGCCGGGAGTGCAT	2	49154280	49154310	GTGAGCCACTGTGCCTGGCCNNNNNNNN
chr5	chr5	192	chr5	ATGAGCCACTGTGCCTGGTCTGGGTTTTGT	2	131284995	131285025	GTGAGCCACTGTGCCTGGCCNNNNNNNN
chr14	chr14	192	chr14	GTGAGCCACCGTGCCTGGCCTGGTGTTAAG	1	56653441	56653471	GTGAGCCACTGTGCCTGGCCNNNNNNNN
chr10	chr10	192	chr10	GTGAGCCACCGTGCCTGGCCTGGTCTTGAT	1	68477596	68477626	GTGAGCCACTGTGCCTGGCCNNNNNNNN
chr7	chr7	191	chr7	ATGAGCCACCGTGCCTGGCCTGGTATCATT	2	149540420	149540450	GTGAGCCACTGTGCCTGGCCNNNNNNNN
chr2	chr2	191	chr2	GTGAGCCACTGTGCCTGGCCTGGACAGCAT	0	86140786	86140816	GTGAGCCACTGTGCCTGGCCNNNNNNNN
chr20	chr20	191	chr20	GTGAGCCACCGTGCCTGGCCTGGAACTAGG	1	43683833	43683863	GTGAGCCACTGTGCCTGGCCNNNNNNNN
chr15	chr15	191	chr15	ATGAGCCACTGCACCTGGCCTGGTCAGATG	3	88950052	88950082	GTGAGCCACTGTGCCTGGCCNNNNNNNN
chr1	chr1	191	chr1	ATGAGCCACTGCGCCTGGCCTGGCCTATTT	2	28381577	28381607	GTGAGCCACTGTGCCTGGCCNNNNNNNN
chr12	chr12	191	chr12	GTGAGCCACTGAGCCTGGCCTGGCAACTCA	1	26869566	26869596	GTGAGCCACTGTGCCTGGCCNNNNNNNN
chr1	chr1	191	chr1	GTGAGCCACCGTGCCTGGCCAGGAAGAAGT	1	217225560	217225590	GTGAGCCACTGTGCCTGGCCNNNNNNNN
chr3	chr3	190	chr3	GTGAGCCACTGCGCCTGGCCAGGTCCCACT	1	60627801	60627831	GTGAGCCACTGTGCCTGGCCNNNNNNNN
chr1	chr1	189	chr1	GTGAACCACTGTGCCTAGCCTGGTTACGTT	2	232960621	232960651	GTGAGCCACTGTGCCTGGCCNNNNNNNN
chr11	chr11	189	chr11	GTGAGCCACTGTGCCTGGCCTGGCCTGTAG	0	20233425	20233455	GTGAGCCACTGTGCCTGGCCNNNNNNNN
chr1	chr1	188	chr1	GTGAGCCACCGTGCCTGGCCTGGAGGGAGG	1	108150908	108150938	GTGAGCCACTGTGCCTGGCCNNNNNNNN
chr1	chr1	187	chr1	GTGAGCCACTATGCCTGGCCTGGGTCAACT	1	161010153	161010183	GTGAGCCACTGTGCCTGGCCNNNNNNNN
chr7	chr7	186	chr7	ATGAGCCACTGTGCCTGGCCTGGATTGCAA	1	66874208	66874238	GTGAGCCACTGTGCCTGGCCNNNNNNNN
chr18	chr18	186	chr18	GTGAGCCACTGCGCCTAGCCAGGTATATCA	2	39415915	39415945	GTGAGCCACTGTGCCTGGCCNNNNNNNN
chr13	chr13	186	chr13	GTGAGCCACTGTGCCTGGCCAGGATTCTTC	0	86420539	86420569	GTGAGCCACTGTGCCTGGCCNNNNNNNN
chr16	chr16	185	chr16	CTGAGCCACTGTGCCTGGCCAGGTGTTCTG	1	3110096	3110126	GTGAGCCACTGTGCCTGGCCNNNNNNNN
chr16	chr16	185	chr16	GTGAGCCACCATGCCTGGCCTGGACCTCTT	2	30073075	30073105	GTGAGCCACTGTGCCTGGCCNNNNNNNN
chr14	chr14	185	chr14	GTGAGCCACTGTGCCTAGCCAGGAGCTAAG	1	90329407	90329437	GTGAGCCACTGTGCCTGGCCNNNNNNNN
chrX	chrX	184	chrX	ATGAGCCACCGTGCCTGGCCAGGTTACAGT	2	115554563	115554593	GTGAGCCACTGTGCCTGGCCNNNNNNNN
chrX	chrX	184	chrX	GTGAGCCACCGTGCCTGGCCAGGAGCCCTA	1	102710159	102710189	GTGAGCCACTGTGCCTGGCCNNNNNNNN
chr7	chr7	184	chr7	ATGAGCCACTGTGCCTGGCTAGGGGTCATT	2	69181386	69181416	GTGAGCCACTGTGCCTGGCCNNNNNNNN
chr17	chr17	184	chr17	GTGAGCCACTGTGCCTGGCCTGGTTGCCAG	0	50271633	50271663	GTGAGCCACTGTGCCTGGCCNNNNNNNN
chr17	chr17	184	chr17	ATGAGCCACTGCGCCTGGCCTGGTTCTGTA	2	17338472	17338502	GTGAGCCACTGTGCCTGGCCNNNNNNNN
chr13	chr13	184	chr13	GTGAGCCACTGTGCCCGGCCTGGCAGAGAT	1	88752993	88753023	GTGAGCCACTGTGCCTGGCCNNNNNNNN
chr1	chr1	184	chr1	ATGAGCCACTGTGCCTAGCCAGGGCTTATT	2	203624915	203624945	GTGAGCCACTGTGCCTGGCCNNNNNNNN
chr1	chr1	184	chr1	ATGAGCCACCGTGCCTGGCCAGGATCTTTC	2	202886604	202886634	GTGAGCCACTGTGCCTGGCCNNNNNNNN
chr11	chr11	184	chr11	GTGAGCCACTGTGCCTGGACTGGCTTTGTA	1	33245759	33245789	GTGAGCCACTGTGCCTGGCCNNNNNNNN
chr1	chr1	182	chr1	ATGAGCCACCATGCCTGGCCTGGGCCTTCC	3	28486574	28486604	GTGAGCCACTGTGCCTGGCCNNNNNNNN
chr1	chr1	182	chr1	GTGAGCCACTCTGCCTGGCCAGGAGGGTGT	1	155844464	155844494	GTGAGCCACTGTGCCTGGCCNNNNNNNN
chr6	chr6	181	chr6	GTGAGCCACTGCGCCTGGCCAGGTCAAATA	1	138525804	138525834	GTGAGCCACTGTGCCTGGCCNNNNNNNN
chr13	chr13	181	chr13	GTGAGCCACCGTGCCTGGCCAGGCCAGAGT	1	84702389	84702419	GTGAGCCACTGTGCCTGGCCNNNNNNNN
chr20	chr20	180	chr20	GTGAGCCACTGTGCCTGGCCAGGTTGCCCC	0	981232	981262	GTGAGCCACTGTGCCTGGCCNNNNNNNN
chr17	chr17	180	chr17	GTGAGCCACTGTGCCTGGCCAAGATGGAGT	0	62988417	62988447	GTGAGCCACTGTGCCTGGCCNNNNNNNN
chr1	chr1	180	chr1	ATGAGCCACTGTGCCTGGCCTGGAAGATAC	1	199933341	199933371	GTGAGCCACTGTGCCTGGCCNNNNNNNN
chr7	chr7	179	chr7	TTGAGCCACTGTGCCTGGCCTGGTTTTGTT	1	152474808	152474838	GTGAGCCACTGTGCCTGGCCNNNNNNNN
chr4	chr4	179	chr4	ATGAGCCACTGTGCCTGGCCTGGACCATAT	1	79343409	79343439	GTGAGCCACTGTGCCTGGCCNNNNNNNN
chr18	chr18	179	chr18	ATGAGCCACTGTGCCTGGCTGGGGTGGGTT	2	39672779	39672809	GTGAGCCACTGTGCCTGGCCNNNNNNNN
chr13	chr13	179	chr13	GTGAGCCACCATGCCTGGCCTGGCATCTTA	2	70538792	70538822	GTGAGCCACTGTGCCTGGCCNNNNNNNN
chr1	chr1	179	chr1	ATGAGCCACTGCACCTGGCCAGGAAAAGAT	3	32116366	32116396	GTGAGCCACTGTGCCTGGCCNNNNNNNN
chr7	chr7	178	chr7	GTGAGCCACTGTGCCTGGCCTGGGCACCAT	0	152890116	152890146	GTGAGCCACTGTGCCTGGCCNNNNNNNN
chr4	chr4	178	chr4	GTGAGCCACCGTGCCTGGCCTGGACGACTT	1	144628404	144628434	GTGAGCCACTGTGCCTGGCCNNNNNNNN
chr22	chr22	178	chr22	GTGAGCCACTGTGCCTGGCCTGGATTTAAT	0	40061502	40061532	GTGAGCCACTGTGCCTGGCCNNNNNNNN
chr6	chr6	177	chr6	ATGAGCCACTGTGCCTGACCAGGTCTATTT	2	135243603	135243633	GTGAGCCACTGTGCCTGGCCNNNNNNNN
chr6	chr6	177	chr6	GTGAGCCACTGTGCCTGGCCAGGATGGCTA	0	131033153	131033183	GTGAGCCACTGTGCCTGGCCNNNNNNNN
chr22	chr22	177	chr22	GTGAGCCACTGTTCCTGGCCGGGTGGTTCG	1	35976670	35976700	GTGAGCCACTGTGCCTGGCCNNNNNNNN
chr2	chr2	177	chr2	ATGAGCCACTGTGCCTGGCCAGGTCTGCAT	1	168325138	168325168	GTGAGCCACTGTGCCTGGCCNNNNNNNN
chr1	chr1	177	chr1	GTGAGCCACCGTGCCTAGCCAGGCTCAGCA	2	56512319	56512349	GTGAGCCACTGTGCCTGGCCNNNNNNNN
chr14	chr14	177	chr14	ATGAGCCACTGTGCCCGGCCAGGAGGAGAT	2	24219847	24219877	GTGAGCCACTGTGCCTGGCCNNNNNNNN
chr1	chr1	177	chr1	ATGAGCCACTGCGCCTGGCCAGGATTGCTT	2	28680444	28680474	GTGAGCCACTGTGCCTGGCCNNNNNNNN
chr7	chr7	176	chr7	ATGAGCCACTGTGCCTGGCCAGGGCCGTGT	1	140278507	140278537	GTGAGCCACTGTGCCTGGCCNNNNNNNN
chr1	chr1	176	chr1	ATGAGCCACTGTGCCTGGCCTGGAGTTATT	1	22026554	22026584	GTGAGCCACTGTGCCTGGCCNNNNNNNN
chrX	chrX	175	chrX	GTGAGCCACTGCGCCTGGCCAGGATGTAAT	1	30733353	30733383	GTGAGCCACTGTGCCTGGCCNNNNNNNN
chr1	chr1	175	chr1	ATGAGCCACTGTGCCTGGTCAGGTAATTAG	2	91039737	91039767	GTGAGCCACTGTGCCTGGCCNNNNNNNN
chr10	chr10	175	chr10	ATGAGCCACTGCACCTGGCCAGGTTATTGA	3	16453195	16453225	GTGAGCCACTGTGCCTGGCCNNNNNNNN
chr13	chr13	174	chr13	ATGAGCCACTGTACCTGGCCTGGACTGATG	2	79537390	79537420	GTGAGCCACTGTGCCTGGCCNNNNNNNN
chr1	chr1	174	chr1	GTGAGCCACCGTGCCTGGCCTGGCTGTTCA	1	201779299	201779329	GTGAGCCACTGTGCCTGGCCNNNNNNNN
chr6	chr6	173	chr6	GTGAGCCACTGCGCCTGGCCAGGTCTTATT	1	139682321	139682351	GTGAGCCACTGTGCCTGGCCNNNNNNNN
chr4	chr4	173	chr4	GTGAGCCACTGCGCCTGGCCAGGCTTACAT	1	112711069	112711099	GTGAGCCACTGTGCCTGGCCNNNNNNNN
chr17	chr17	173	chr17	GTGAGCCACCATGCCTGGCCTGGAAATCTG	2	64132984	64133014	GTGAGCCACTGTGCCTGGCCNNNNNNNN
chr17	chr17	173	chr17	GTGAGCCACCATGCCTGGCCTGGTATCACA	2	51082084	51082114	GTGAGCCACTGTGCCTGGCCNNNNNNNN
chr10	chr10	173	chr10	GTGAGCCACTGTGCCTGGCCAGGTGTGGGT	0	7699856	7699886	GTGAGCCACTGTGCCTGGCCNNNNNNNN
chr9	chr9	172	chr9	GTGAGCCACCGTGCCTGGCCGGGACATAAT	1	33869729	33869759	GTGAGCCACTGTGCCTGGCCNNNNNNNN
chr8	chr8	172	chr8	ATGAGCCACTGCACCTGGCCTGGCTTAATT	3	69838715	69838745	GTGAGCCACTGTGCCTGGCCNNNNNNNN
chr2	chr2	172	chr2	GTGAGCCACCGCGCCTGGCCAGGTTTCATA	2	42181575	42181605	GTGAGCCACTGTGCCTGGCCNNNNNNNN
chr17	chr17	172	chr17	GTGAGCCACTGCGCCTGGCCTGGATTCCAT	1	77519037	77519067	GTGAGCCACTGTGCCTGGCCNNNNNNNN
chr1	chr1	172	chr1	ATGAGCCACCGTGCCTGGCCAGGAGTAGGA	2	67127914	67127944	GTGAGCCACTGTGCCTGGCCNNNNNNNN
chr13	chr13	172	chr13	GTGAGCCACAGTGCCTGGCCAGGTATAATT	1	86661793	86661823	GTGAGCCACTGTGCCTGGCCNNNNNNNN
chrX	chrX	171	chrX	GTGAGCCACCATGCCTGGCCAGGGTTTTAT	2	115633449	115633479	GTGAGCCACTGTGCCTGGCCNNNNNNNN
chr6	chr6	171	chr6	ATGAGCCACTGAGCCTGGCCTGGTTGTTTC	2	15172294	15172324	GTGAGCCACTGTGCCTGGCCNNNNNNNN
chr3	chr3	171	chr3	GTGAGCCACTGTGCCTGGCCAGGAGTCTGT	0	17816091	17816121	GTGAGCCACTGTGCCTGGCCNNNNNNNN
chr22	chr22	171	chr22	GTGAGCCACTGTGCCTGGCCGGGAGGTCCT	0	31152424	31152454	GTGAGCCACTGTGCCTGGCCNNNNNNNN
chr14	chr14	171	chr14	GTGAGCCACTGTGCCTGGCCTGGATGATAT	0	39901956	39901986	GTGAGCCACTGTGCCTGGCCNNNNNNNN
chr1	chr1	171	chr1	GTGAGCCACCGTGCCTGGCCGGGTAGTTTT	1	173564916	173564946	GTGAGCCACTGTGCCTGGCCNNNNNNNN
chr10	chr10	171	chr10	ATGAGCCACCGTGCCTGGCCAGGGGATGAT	2	6122773	6122803	GTGAGCCACTGTGCCTGGCCNNNNNNNN
chr12	chr12	170	chr12	GTGAGCCACCGTGCCTGGCCAGGTTATTTT	1	92152560	92152590	GTGAGCCACTGTGCCTGGCCNNNNNNNN
chr10	chr10	170	chr10	GTGAGCCACCGTGCCTAGCCAGGTTGGAAT	2	5891891	5891921	GTGAGCCACTGTGCCTGGCCNNNNNNNN
chr10	chr10	170	chr10	ATGAGCCACCGTGCCTGGCCCGGAAGAGTT	2	119054422	119054452	GTGAGCCACTGTGCCTGGCCNNNNNNNN
chrX	chrX	169	chrX	GTGAGCCACTGTGCCTGGCCTGGTGGGGTT	0	23865311	23865341	GTGAGCCACTGTGCCTGGCCNNNNNNNN
chr3	chr3	169	chr3	GTGAGCCACTGTGCCTGGCCTGGTTTTTTG	0	155786534	155786564	GTGAGCCACTGTGCCTGGCCNNNNNNNN
chr16	chr16	169	chr16	ATGAGCCACCATGCCTGGCCTGGTATGAGT	3	10570820	10570850	GTGAGCCACTGTGCCTGGCCNNNNNNNN
chr1	chr1	169	chr1	GTGAGCCACCATGCCTGGCCTGGCCCTTGC	2	28462288	28462318	GTGAGCCACTGTGCCTGGCCNNNNNNNN
chr11	chr11	169	chr11	GTGAGCCACTGTGCCTGGCCAGGAATGTAT	0	4136499	4136529	GTGAGCCACTGTGCCTGGCCNNNNNNNN
chr6	chr6	168	chr6	GTGAGCCACTGTGCCTGGCCAGGTTCAATC	0	117479392	117479422	GTGAGCCACTGTGCCTGGCCNNNNNNNN
chr19	chr19	168	chr19	ATGAGCCACTGTGCCTGGCCAGGGTCCTGC	1	36662534	36662564	GTGAGCCACTGTGCCTGGCCNNNNNNNN
chr1	chr1	168	chr1	GTGAGCCACTGTGCCTAGCCAGGAGTATTT	1	10321383	10321413	GTGAGCCACTGTGCCTGGCCNNNNNNNN
chrX	chrX	167	chrX	GTGAGCCACTGTGCCTGGCCAGGACTACTT	0	71280925	71280955	GTGAGCCACTGTGCCTGGCCNNNNNNNN
chr7	chr7	167	chr7	CTGAGCCACTGTGCCTGGCCTGGAAATTAC	1	136038214	136038244	GTGAGCCACTGTGCCTGGCCNNNNNNNN
chr3	chr3	167	chr3	ATGAGCCACTGTGCCTGGCCAGGGGCCAGT	1	132364051	132364081	GTGAGCCACTGTGCCTGGCCNNNNNNNN
chr17	chr17	167	chr17	ATGAGCCACTCTGCCTGGCCAGGCTTTCTT	2	72378098	72378128	GTGAGCCACTGTGCCTGGCCNNNNNNNN
chr17	chr17	167	chr17	ATGAGCCACCATGCCTGGCCAGGTTATAAT	3	67162123	67162153	GTGAGCCACTGTGCCTGGCCNNNNNNNN
chr15	chr15	167	chr15	ATGAGCCACCGTGCCTGGCAGGGAAGGCCT	3	89577890	89577920	GTGAGCCACTGTGCCTGGCCNNNNNNNN
chr1	chr1	167	chr1	GTGAGCCACCATGCCTGGCCTGGGTTGATT	2	57107082	57107112	GTGAGCCACTGTGCCTGGCCNNNNNNNN
chr14	chr14	167	chr14	ATGAGCCACCGTGCCTGGCCTGGACTTACC	2	92267942	92267972	GTGAGCCACTGTGCCTGGCCNNNNNNNN
chr14	chr14	167	chr14	ATGAGCCACTGTGCCTGGCTGGGAGACACC	2	21013640	21013670	GTGAGCCACTGTGCCTGGCCNNNNNNNN
chrX	chrX	166	chrX	ATGAGCCACTGTGCCTGGCCAGGTTTAACT	1	132070311	132070341	GTGAGCCACTGTGCCTGGCCNNNNNNNN
chr8	chr8	166	chr8	ATGAGCCACTGTGCCTGGCTGGGTCTGGCA	2	37808659	37808689	GTGAGCCACTGTGCCTGGCCNNNNNNNN
chr5	chr5	166	chr5	ATGAGCCACTATGCCTGGCCTGGACTAGAG	2	60801207	60801237	GTGAGCCACTGTGCCTGGCCNNNNNNNN
chr5	chr5	166	chr5	GTGAGCCACTGTGCCTGGCCAGGCATTTTT	0	143604702	143604732	GTGAGCCACTGTGCCTGGCCNNNNNNNN
chr3	chr3	166	chr3	ATGAGCCACTGTGCCTGGCCTGGGCTGGGA	1	66677881	66677911	GTGAGCCACTGTGCCTGGCCNNNNNNNN
chr21	chr21	166	chr21	ATGAGCCATTGTGCCTGGCCTGGTCACTTG	2	33689092	33689122	GTGAGCCACTGTGCCTGGCCNNNNNNNN
chr1	chr1	166	chr1	GTGAGGCACTGTGCCTGGCCCGGATCTTAT	1	86199782	86199812	GTGAGCCACTGTGCCTGGCCNNNNNNNN
chr17	chr17	166	chr17	ATGAGCCACCGTGCCTGGCCAGGGGAGACT	2	5085326	5085356	GTGAGCCACTGTGCCTGGCCNNNNNNNN
chr1	chr1	166	chr1	ATGAGCCACTGCACCTGGCCAGGGCTCATT	3	225900673	225900703	GTGAGCCACTGTGCCTGGCCNNNNNNNN
chr12	chr12	166	chr12	GTGAGCCACTGTGCCTGGCCAGGGATAAAT	0	24644356	24644386	GTGAGCCACTGTGCCTGGCCNNNNNNNN
chrX	chrX	165	chrX	ATGAGCCACCGTGCCTGGCCTGGGTATGTA	2	96664947	96664977	GTGAGCCACTGTGCCTGGCCNNNNNNNN
chr9	chr9	165	chr9	GTGAGCCACCGTGCCTGGCCTGGGTTTATT	1	19984413	19984443	GTGAGCCACTGTGCCTGGCCNNNNNNNN
chr7	chr7	165	chr7	GTGAGCCACTGTGCCTGGCCAGGATTTAAT	0	151364795	151364825	GTGAGCCACTGTGCCTGGCCNNNNNNNN
chr6	chr6	165	chr6	GTGAGCCACCGTGCCTGGCCTGGAGTAAGT	1	7094518	7094548	GTGAGCCACTGTGCCTGGCCNNNNNNNN
chr22	chr22	165	chr22	GTGAGCCACCGTGCCTGGCCAGGTTATGAG	1	34340247	34340277	GTGAGCCACTGTGCCTGGCCNNNNNNNN
chr21	chr21	165	chr21	GTGAGCCACCGTGCCTGGCCGGGATCCTGA	1	36174779	36174809	GTGAGCCACTGTGCCTGGCCNNNNNNNN
chr17	chr17	165	chr17	ATGAGCCACTGTGCCTGGCCCGGTCTGTCA	1	19532010	19532040	GTGAGCCACTGTGCCTGGCCNNNNNNNN
chr14	chr14	165	chr14	GTGAGCCACTGTGCCTAGCCAGGGGTAGCT	1	34291222	34291252	GTGAGCCACTGTGCCTGGCCNNNNNNNN
chrX	chrX	164	chrX	GTGAGCCACCATGCCTGGCCGGGGAGCAGA	2	101076498	101076528	GTGAGCCACTGTGCCTGGCCNNNNNNNN
chr6	chr6	164	chr6	ATGAGCCACTGTGCCTGGCCTGGGTTTTGT	1	7375444	7375474	GTGAGCCACTGTGCCTGGCCNNNNNNNN
chr6	chr6	164	chr6	GTGAGCCACTGTGCCTGGCCAGGTTTCCTA	0	111396809	111396839	GTGAGCCACTGTGCCTGGCCNNNNNNNN
chr4	chr4	164	chr4	GTGAGCCACCGTGCCTGGCCAGGATGTCAC	1	18757551	18757581	GTGAGCCACTGTGCCTGGCCNNNNNNNN
chr2	chr2	164	chr2	GTGAGCCACTGTGCCTGGCCTGGGGAGCAG	0	71213030	71213060	GTGAGCCACTGTGCCTGGCCNNNNNNNN
chr15	chr15	164	chr15	GTGAGCCACCGTGCCTGGCCAGGGCTTTTG	1	68732943	68732973	GTGAGCCACTGTGCCTGGCCNNNNNNNN
chr9	chr9	163	chr9	GTGAGCCACTGTGCCTGGCCTGGAGTCTGT	0	96728028	96728058	GTGAGCCACTGTGCCTGGCCNNNNNNNN
chr18	chr18	163	chr18	GTGAGCCACTGCGCCTGGCCAGGGTCTTTT	1	32575805	32575835	GTGAGCCACTGTGCCTGGCCNNNNNNNN
chr15	chr15	163	chr15	GTTAGCCACTGTGCCTGGCCAGGAATTAAA	1	93259902	93259932	GTGAGCCACTGTGCCTGGCCNNNNNNNN
chr1	chr1	163	chr1	GTGAGCCACAGTGCCTGGCCTGGATGTATC	1	52647553	52647583	GTGAGCCACTGTGCCTGGCCNNNNNNNN
chrX	chrX	162	chrX	GTGAGCCACTGCACCTGGCCAGGAATAATA	2	71019432	71019462	GTGAGCCACTGTGCCTGGCCNNNNNNNN
chr17	chr17	162	chr17	ATGAGCCACTGCGCCTGGCCTGGATGCCAC	2	81679435	81679465	GTGAGCCACTGTGCCTGGCCNNNNNNNN
chr16	chr16	162	chr16	GTGAGCCACCGTGCCTAGCCAGGGTTGAAT	2	29800472	29800502	GTGAGCCACTGTGCCTGGCCNNNNNNNN
chr13	chr13	162	chr13	ATGAGACACTGTGCCTGGCCAGGCATAACT	2	95967751	95967781	GTGAGCCACTGTGCCTGGCCNNNNNNNN
chr13	chr13	162	chr13	GTGAGCCACTATGCCTGGCCAGGGTGATTT	1	76712619	76712649	GTGAGCCACTGTGCCTGGCCNNNNNNNN
chr1	chr1	162	chr1	GTGAGCCACTGTGCCTGGCCAGGAAATGGA	0	236092441	236092471	GTGAGCCACTGTGCCTGGCCNNNNNNNN
chr1	chr1	162	chr1	ATGAGCCACTGTGCCTGGCCTGGACTGTGA	1	153875936	153875966	GTGAGCCACTGTGCCTGGCCNNNNNNNN
chr10	chr10	162	chr10	GTGAGCCACTGTGCCTGGCCAGGATGCTGA	0	73020842	73020872	GTGAGCCACTGTGCCTGGCCNNNNNNNN
chr7	chr7	161	chr7	GTGAGCCACCATGCCTGGCCTGGCTGCGCA	2	156885457	156885487	GTGAGCCACTGTGCCTGGCCNNNNNNNN
chr7	chr7	161	chr7	GTGAGCCACTGCACCTGGCCAGGAATGTGT	2	149197748	149197778	GTGAGCCACTGTGCCTGGCCNNNNNNNN
chr2	chr2	161	chr2	GTGAGCCACTGCGCCTGGCCGGGTACAAGA	1	138958698	138958728	GTGAGCCACTGTGCCTGGCCNNNNNNNN
chr15	chr15	161	chr15	GTGAGCCACCATGCCTGGCCAGGTACTTGA	2	100566188	100566218	GTGAGCCACTGTGCCTGGCCNNNNNNNN
chr13	chr13	161	chr13	GTGAGCCACTGTGCCCAGCCTGGCAGGTTT	2	82193505	82193535	GTGAGCCACTGTGCCTGGCCNNNNNNNN
chr7	chr7	160	chr7	ATGAGCCACCATGCCTGGCCAGGGTTGCTG	3	134081050	134081080	GTGAGCCACTGTGCCTGGCCNNNNNNNN
chr7	chr7	160	chr7	GTGAGCCACTGCGCCTGGCCTGGGTCTTGT	1	133473987	133474017	GTGAGCCACTGTGCCTGGCCNNNNNNNN
chr3	chr3	160	chr3	GTGAGCCACCGTGCCTGGCCAGGATTTCTT	1	58351540	58351570	GTGAGCCACTGTGCCTGGCCNNNNNNNN
chr12	chr12	160	chr12	GTGAGCCACTGTGCCTGGCCTGGTCTGTAG	0	83071436	83071466	GTGAGCCACTGTGCCTGGCCNNNNNNNN
chr1	chr1	160	chr1	GTGAGCCACCATGCCTGGCCAGGAGGTGAA	2	244895448	244895478	GTGAGCCACTGTGCCTGGCCNNNNNNNN
chr1	chr1	160	chr1	ATGAGCCACTGCGCCTGGCCAGGAATTAGT	2	15538425	15538455	GTGAGCCACTGTGCCTGGCCNNNNNNNN
chr10	chr10	160	chr10	ATGAGCCACCATGCCTGGCCAGGCTGAGAT	3	110178723	110178753	GTGAGCCACTGTGCCTGGCCNNNNNNNN
chrX	chrX	159	chrX	GTGAGCCACTGTGCCTAGCCAGGTTCACTG	1	72435675	72435705	GTGAGCCACTGTGCCTGGCCNNNNNNNN
chr4	chr4	159	chr4	GTGAGCCACTGTGCCTGGCCAGGAATACGT	0	143523306	143523336	GTGAGCCACTGTGCCTGGCCNNNNNNNN
chr2	chr2	159	chr2	GTGAGCCACTGTGCCTGGCCTGGGTCTTCC	0	173315684	173315714	GTGAGCCACTGTGCCTGGCCNNNNNNNN
chr21	chr21	159	chr21	ATGAGCCACCATGCCTGGCCGGGAAGAGAA	3	40425233	40425263	GTGAGCCACTGTGCCTGGCCNNNNNNNN
chr21	chr21	159	chr21	ATGAGCCACTGTGCCTGGCCTGGTTCTTTC	1	31242227	31242257	GTGAGCCACTGTGCCTGGCCNNNNNNNN
chr17	chr17	159	chr17	GTGAGCCACCGTGCCTGGCCCGGAAGATGA	1	6356219	6356249	GTGAGCCACTGTGCCTGGCCNNNNNNNN
chr1	chr1	159	chr1	GTGAGCCACCGTGCCTGGCCAGGTCAAGTT	1	54249402	54249432	GTGAGCCACTGTGCCTGGCCNNNNNNNN
chr8	chr8	158	chr8	GTGAGCCACTGTGCCTGGCCAGGTTTTTAT	0	120052702	120052732	GTGAGCCACTGTGCCTGGCCNNNNNNNN
chr5	chr5	158	chr5	ATGAGCCACCGTGCCTGGCCAGGAAAGGAG	2	104905730	104905760	GTGAGCCACTGTGCCTGGCCNNNNNNNN
chr22	chr22	158	chr22	ATGAGCCACTGAGCCTGGCCTGGTGAATTA	2	19436412	19436442	GTGAGCCACTGTGCCTGGCCNNNNNNNN
chr15	chr15	158	chr15	ATGAGCCACCGTGCCTGGCCGGGTGCAATT	2	89989815	89989845	GTGAGCCACTGTGCCTGGCCNNNNNNNN
chr14	chr14	158	chr14	GTGAGCCACCGTGCCTGGCCAGGTGCCTGA	1	76485521	76485551	GTGAGCCACTGTGCCTGGCCNNNNNNNN
chr7	chr7	157	chr7	GTGAGCCACCGTGCCTGGCCAGGACTGCTA	1	66106681	66106711	GTGAGCCACTGTGCCTGGCCNNNNNNNN
chr7	chr7	157	chr7	GTGAGCCACCGTGCCTGGCCGGGAATAGCA	1	140847290	140847320	GTGAGCCACTGTGCCTGGCCNNNNNNNN
chr6	chr6	157	chr6	GTGAGCCACTGTGCCTGGCCAGGGTGAGTT	0	158840387	158840417	GTGAGCCACTGTGCCTGGCCNNNNNNNN
chr5	chr5	157	chr5	ATGAGCCACCGTGCCTGGCCTGGTTTATTA	2	79389993	79390023	GTGAGCCACTGTGCCTGGCCNNNNNNNN
chr22	chr22	157	chr22	ATGAGCCACCGTGCCTGGCCTGGATTATTT	2	27812453	27812483	GTGAGCCACTGTGCCTGGCCNNNNNNNN
chr20	chr20	157	chr20	GTGAGCCACTGTACCTGGCCAGGAAAAATA	1	4437102	4437132	GTGAGCCACTGTGCCTGGCCNNNNNNNN
chr1	chr1	157	chr1	ATGAGCCACTGCGCCTGGCCAGGAAACTCT	2	86739852	86739882	GTGAGCCACTGTGCCTGGCCNNNNNNNN
chr18	chr18	157	chr18	GTGAGCCACTGTGCCTGGCCTGGAACTTTC	0	21123215	21123245	GTGAGCCACTGTGCCTGGCCNNNNNNNN
chr16	chr16	157	chr16	GTGAGCCACTGTGCCTGGCCTGGCTTTCTT	0	2138042	2138072	GTGAGCCACTGTGCCTGGCCNNNNNNNN
chr9	chr9	156	chr9	ATGAGCCACTGTGCCCAGCCAGGTTGTGAC	3	19146609	19146639	GTGAGCCACTGTGCCTGGCCNNNNNNNN
chr7	chr7	156	chr7	ATGAGCCACTGTGCCAGGCCTGGGATTGTT	2	124718952	124718982	GTGAGCCACTGTGCCTGGCCNNNNNNNN
chr22	chr22	156	chr22	GTGAGCCACTGTGCCTGGCCTGGGGTGATA	0	29465109	29465139	GTGAGCCACTGTGCCTGGCCNNNNNNNN
chr21	chr21	156	chr21	ATGAGCCACTGTGCCTGGCCTGGAGAGAAA	1	32519047	32519077	GTGAGCCACTGTGCCTGGCCNNNNNNNN
chr20	chr20	156	chr20	GTGAGCCACCATGCCTGGCCTGGCTTGAAT	2	35375658	35375688	GTGAGCCACTGTGCCTGGCCNNNNNNNN
chr1	chr1	156	chr1	GTGAGCCACTGCGCCTGGCCAGGTAGTTCT	1	78372027	78372057	GTGAGCCACTGTGCCTGGCCNNNNNNNN
chr1	chr1	156	chr1	GTGAGCCACCGTGCCTGGCCGGGCTGGCAG	1	220109108	220109138	GTGAGCCACTGTGCCTGGCCNNNNNNNN
chr1	chr1	156	chr1	GTGAGCCACCGTGCCTGGCCGGGATTCTTT	1	196348733	196348763	GTGAGCCACTGTGCCTGGCCNNNNNNNN
chr11	chr11	156	chr11	ATGAGCCACTGTGCCTGGCCAGGACAATGC	1	18374555	18374585	GTGAGCCACTGTGCCTGGCCNNNNNNNN
chr10	chr10	156	chr10	GTGAGCCACCGTGCCTGGCCTGGCTAATCC	1	43316960	43316990	GTGAGCCACTGTGCCTGGCCNNNNNNNN
chr7	chr7	155	chr7	GTGAGCCACCGTGCCTGGCCTGGTTCGTGG	1	81473408	81473438	GTGAGCCACTGTGCCTGGCCNNNNNNNN
chr7	chr7	155	chr7	GTGAGCCACTGTGCCTGGCCAGGATTATTA	0	150422460	150422490	GTGAGCCACTGTGCCTGGCCNNNNNNNN
chr22	chr22	155	chr22	GTGAGCCACTGCGCCTGGCCAGGAATCGCT	1	37699820	37699850	GTGAGCCACTGTGCCTGGCCNNNNNNNN
chr2	chr2	155	chr2	GTGAGCCACTGTGCCTGGCCCGGTCTTGTT	0	177416808	177416838	GTGAGCCACTGTGCCTGGCCNNNNNNNN
chr21	chr21	155	chr21	ATGAGCCACTGTGCCTAGCCTGGAATTTAT	2	17466001	17466031	GTGAGCCACTGTGCCTGGCCNNNNNNNN
chr17	chr17	155	chr17	GTGAGCCACTGTGCCTGGCCTGGGCAAAGA	0	7607026	7607056	GTGAGCCACTGTGCCTGGCCNNNNNNNN
chr17	chr17	155	chr17	GTGAGCCACTGTGCCCGGCCAGGATAGTGT	1	32291389	32291419	GTGAGCCACTGTGCCTGGCCNNNNNNNN
chr1	chr1	155	chr1	GTGAGCCACCATGCCTGGCCAGGAGGGCAT	2	58388006	58388036	GTGAGCCACTGTGCCTGGCCNNNNNNNN
chr14	chr14	155	chr14	ATGAGCCACTGCACCTGGCCAGGTGTTCCT	3	22805075	22805105	GTGAGCCACTGTGCCTGGCCNNNNNNNN
chr12	chr12	155	chr12	GTGAGCCACTGTGCCTGGCCTGGAAACCAG	0	22662677	22662707	GTGAGCCACTGTGCCTGGCCNNNNNNNN
chr12	chr12	155	chr12	GTGAGCCACTGCGCCTGGCCTGGGCTCTCA	1	125879411	125879441	GTGAGCCACTGTGCCTGGCCNNNNNNNN
chr12	chr12	155	chr12	GTGAGCCACTGTGCCTAGCCAGGTTGTCTG	1	123682761	123682791	GTGAGCCACTGTGCCTGGCCNNNNNNNN
chr1	chr1	155	chr1	GTGAGCCACCGTGCCTGGCCTGGTTCTACT	1	208124386	208124416	GTGAGCCACTGTGCCTGGCCNNNNNNNN
chrX	chrX	154	chrX	ATGAGCCACCATGCCTGACCAGGACTGTAT	4	129488316	129488346	GTGAGCCACTGTGCCTGGCCNNNNNNNN
chr8	chr8	154	chr8	GTGAGCCACTGCGCCTAGCCAGGGTTGGGG	2	123281439	123281469	GTGAGCCACTGTGCCTGGCCNNNNNNNN
chr3	chr3	154	chr3	ATGAGCCACTGCACCTGGCCTGGGCTTCAG	3	127656297	127656327	GTGAGCCACTGTGCCTGGCCNNNNNNNN
chr19	chr19	154	chr19	GTGAGCCACTGTGCCTGGCCGGGGAACTTT	0	16552612	16552642	GTGAGCCACTGTGCCTGGCCNNNNNNNN
chr12	chr12	154	chr12	GTGAGCCACTGTGCCCGGCCTGGTGCTCAT	1	123368626	123368656	GTGAGCCACTGTGCCTGGCCNNNNNNNN
chr11	chr11	154	chr11	GTGAGCCACTGTGCCTGGCCGGGTTGATAA	0	70563148	70563178	GTGAGCCACTGTGCCTGGCCNNNNNNNN
chr10	chr10	154	chr10	GTGAGCCACTGTGCCTGGCCAGGATTAACC	0	108709204	108709234	GTGAGCCACTGTGCCTGGCCNNNNNNNN
chrX	chrX	153	chrX	ATGAACCACTGTGCCTGGCCTGGTAATATT	2	15510383	15510413	GTGAGCCACTGTGCCTGGCCNNNNNNNN
chr9	chr9	153	chr9	GTGAGCCACTGCGCCTGGCCAGGGTTTTTT	1	132348066	132348096	GTGAGCCACTGTGCCTGGCCNNNNNNNN
chr9	chr9	153	chr9	ATGAGCTACTGCGCCTGGCCTGGACCTATG	3	109115054	109115084	GTGAGCCACTGTGCCTGGCCNNNNNNNN
chr8	chr8	153	chr8	GTGAGCCACCATGCCTGGCCAGGCACAGCA	2	140455708	140455738	GTGAGCCACTGTGCCTGGCCNNNNNNNN
chr7	chr7	153	chr7	ATGAGCCACCATGCCTGGCCAGGTTTCATT	3	38703279	38703309	GTGAGCCACTGTGCCTGGCCNNNNNNNN
chr6	chr6	153	chr6	ATGAGCCACTGTGCCTAGCCAGGAGTACAT	2	154303629	154303659	GTGAGCCACTGTGCCTGGCCNNNNNNNN
chr6	chr6	153	chr6	ATGAGCCACTGCGCCTGGCCAGGAGTCGGA	2	133907983	133908013	GTGAGCCACTGTGCCTGGCCNNNNNNNN
chr6	chr6	153	chr6	GTGAGCCACCATGCCTGGCCAGGACATAAA	2	116674418	116674448	GTGAGCCACTGTGCCTGGCCNNNNNNNN
chr22	chr22	153	chr22	GTGAGCCACTGCACCTAGCCGGGGTATGAG	3	28944185	28944215	GTGAGCCACTGTGCCTGGCCNNNNNNNN
chr22	chr22	153	chr22	GTGAACCACCATGCCTGGCCAGGTTCCAGA	3	24026253	24026283	GTGAGCCACTGTGCCTGGCCNNNNNNNN
chr2	chr2	153	chr2	GTGAGCCACTGTGCCTGGCCAGGAAGCATT	0	222725097	222725127	GTGAGCCACTGTGCCTGGCCNNNNNNNN
chr17	chr17	153	chr17	GTGAGCCACTGTGCCTGGCCTGGCCTGAAC	0	41866564	41866594	GTGAGCCACTGTGCCTGGCCNNNNNNNN
chr1	chr1	153	chr1	GTGAGCCACTGCACCTGGCCTGGTGAGTGT	2	26380925	26380955	GTGAGCCACTGTGCCTGGCCNNNNNNNN
chr12	chr12	153	chr12	GTGAGCCACTGCACCTGGCCTGGGATCAGC	2	124824932	124824962	GTGAGCCACTGTGCCTGGCCNNNNNNNN
chr12	chr12	153	chr12	GAGAGCCACTGTGCCTGGCTAGGAGGGGAA	2	108607567	108607597	GTGAGCCACTGTGCCTGGCCNNNNNNNN
chr1	chr1	153	chr1	GTGAGCCACTGCGCCTGGCCAGGCCATGTA	1	19389705	19389735	GTGAGCCACTGTGCCTGGCCNNNNNNNN
chr1	chr1	153	chr1	GTGAGCCACTGCACCTGGCCTGGCTGTGGG	2	177003518	177003548	GTGAGCCACTGTGCCTGGCCNNNNNNNN
chr1	chr1	153	chr1	GTGAGCCACTGAGCCTGGCCTGGACCCTAA	1	156175986	156176016	GTGAGCCACTGTGCCTGGCCNNNNNNNN
chr7	chr7	152	chr7	GTGAGCCACTGTGCCTGGCCAGGATTATAT	0	99302588	99302618	GTGAGCCACTGTGCCTGGCCNNNNNNNN
chr7	chr7	152	chr7	GTGAGCCACTGCGCCTGGCCAGGTAGTTAA	1	148346964	148346994	GTGAGCCACTGTGCCTGGCCNNNNNNNN
chr6	chr6	152	chr6	ATGAGCCACCATGCCTGGCCAGGACCCAAT	3	151272048	151272078	GTGAGCCACTGTGCCTGGCCNNNNNNNN
chr2	chr2	152	chr2	ATGAGCCACCATGCCTGGCCTGGGTTCTGG	3	197467226	197467256	GTGAGCCACTGTGCCTGGCCNNNNNNNN
chr15	chr15	152	chr15	TTGAGCCACTGTGCCTGGCCAGGTCTGATT	1	91633705	91633735	GTGAGCCACTGTGCCTGGCCNNNNNNNN
chr1	chr1	152	chr1	ATGAGCCATTGTGCCTGGCCTGGTTTTTCA	2	155488164	155488194	GTGAGCCACTGTGCCTGGCCNNNNNNNN
chr1	chr1	152	chr1	GTGAGCCACTGCGCCTGGCCAGGACTACCT	1	149958593	149958623	GTGAGCCACTGTGCCTGGCCNNNNNNNN
chr11	chr11	152	chr11	ATGAACCACTGTGCCTGGCCTGGCTTTCCC	2	32950373	32950403	GTGAGCCACTGTGCCTGGCCNNNNNNNN
chr10	chr10	152	chr10	GTGAGCCACCGTGCCTGGCCTGGATTCTCA	1	70635311	70635341	GTGAGCCACTGTGCCTGGCCNNNNNNNN
chr7	chr7	151	chr7	GTGAGCCACTGTGCCTGGTCTGGAGTAGTA	1	17926593	17926623	GTGAGCCACTGTGCCTGGCCNNNNNNNN
chr7	chr7	151	chr7	GTGAGCCACTGTGCCTGGCCTGGGTCCCTA	0	151064008	151064038	GTGAGCCACTGTGCCTGGCCNNNNNNNN
chr6	chr6	151	chr6	GTGAGCCACTGTGCCCAGCCAGGGTTGTGT	2	38096450	38096480	GTGAGCCACTGTGCCTGGCCNNNNNNNN
chr2	chr2	151	chr2	GTGAGCCACCATGCCTGGCCTGGCCTGGAA	2	25011152	25011182	GTGAGCCACTGTGCCTGGCCNNNNNNNN
chr22	chr22	151	chr22	GTGAGTCACTGTGCCTGGCCTGGAAGTAGG	1	38619603	38619633	GTGAGCCACTGTGCCTGGCCNNNNNNNN
chr22	chr22	151	chr22	GTGAGCCACCGTGCCTGACCTGGAAGCTTA	2	27955434	27955464	GTGAGCCACTGTGCCTGGCCNNNNNNNN
chr17	chr17	151	chr17	GTGAGCCACTGCACCTGGCCAGGAAGAGTT	2	2649280	2649310	GTGAGCCACTGTGCCTGGCCNNNNNNNN
chr17	chr17	151	chr17	ATGAGCCACCGTGCCTGGCCAGGTCACCCT	2	12745488	12745518	GTGAGCCACTGTGCCTGGCCNNNNNNNN
chr12	chr12	151	chr12	ATGAGCCACTGTGCCTGGCCTGGAGACGTT	1	63804132	63804162	GTGAGCCACTGTGCCTGGCCNNNNNNNN
chr1	chr1	151	chr1	GTGAGCCACTGCACCTGGCCAGGATATACT	2	241205740	241205770	GTGAGCCACTGTGCCTGGCCNNNNNNNN
chr10	chr10	151	chr10	ATGAGCCACCGTGCCTGGCCGGGAAGTGCT	2	106889471	106889501	GTGAGCCACTGTGCCTGGCCNNNNNNNN
chr15	chr15	150	chr15	GTGAGCCACTGTGCCCGGCCAGGACTTGTT	1	89499694	89499724	GTGAGCCACTGTGCCTGGCCNNNNNNNN
chr1	chr1	150	chr1	GTGAGCCACTGTACCTGACCTGGAAAACTT	2	212399823	212399853	GTGAGCCACTGTGCCTGGCCNNNNNNNN
chr1	chr1	150	chr1	GTGAGCCACCATGCCTGGCCTGGATCGCCT	2	113932658	113932688	GTGAGCCACTGTGCCTGGCCNNNNNNNN
chr10	chr10	150	chr10	GTGAGCCACTATGCCTGACCCGGTCTTGTA	2	98274539	98274569	GTGAGCCACTGTGCCTGGCCNNNNNNNN
chr8	chr8	149	chr8	ATGAGCCACCATGCCTGGCCGGGTCTTGAC	3	70967348	70967378	GTGAGCCACTGTGCCTGGCCNNNNNNNN
chr7	chr7	149	chr7	GTGAGCCACTGTGCCTGGCCAGGGCTAATA	0	143377995	143378025	GTGAGCCACTGTGCCTGGCCNNNNNNNN
chr6	chr6	149	chr6	ATGAGCCATCGTGCCTGGCCTGGAATGACA	3	111568625	111568655	GTGAGCCACTGTGCCTGGCCNNNNNNNN
chr3	chr3	149	chr3	GTGAGCCACCATGCCTGGCCTGGTTCTGAT	2	133424913	133424943	GTGAGCCACTGTGCCTGGCCNNNNNNNN
chr22	chr22	149	chr22	GTGAGCCACTGTGTCTGGCCTGGATTCAAT	1	18030426	18030456	GTGAGCCACTGTGCCTGGCCNNNNNNNN
chr17	chr17	149	chr17	GTGAACCACTGCACCTGGCCGGGATTTGTA	3	65128658	65128688	GTGAGCCACTGTGCCTGGCCNNNNNNNN
chr16	chr16	149	chr16	GTGAGCCACTGTGTCTGGCCAGGACTTAAT	1	85415219	85415249	GTGAGCCACTGTGCCTGGCCNNNNNNNN
chr15	chr15	149	chr15	ATGAGCCACCGTGCCTGGCCAGGTCTCCTG	2	90151789	90151819	GTGAGCCACTGTGCCTGGCCNNNNNNNN
chr13	chr13	149	chr13	GTGAGCCACCATGCCTGGCCAGGAGTTGAT	2	89904365	89904395	GTGAGCCACTGTGCCTGGCCNNNNNNNN
chr13	chr13	149	chr13	GTGAGCTACTGTGCCTGGCCTGGAGCAGAA	1	27120360	27120390	GTGAGCCACTGTGCCTGGCCNNNNNNNN
chr1	chr1	149	chr1	ATGAGCCACTGTGCCCAGCCAGGACTACAA	3	200522496	200522526	GTGAGCCACTGTGCCTGGCCNNNNNNNN
chrX	chrX	148	chrX	GTGAGCCACTGTGCCTGGCCAGGTTGGGGA	0	2621878	2621908	GTGAGCCACTGTGCCTGGCCNNNNNNNN
chr9	chr9	148	chr9	ATGAGCCACTGTGCCTGGCCAGGTTGACTC	1	131355576	131355606	GTGAGCCACTGTGCCTGGCCNNNNNNNN
chr5	chr5	148	chr5	ATGAACCACTATGCCTGGCCAGGGTCAATA	3	139616889	139616919	GTGAGCCACTGTGCCTGGCCNNNNNNNN
chr19	chr19	148	chr19	GTGAGCCACTGTGCCTGGCCAGGTAGGTTA	0	51871396	51871426	GTGAGCCACTGTGCCTGGCCNNNNNNNN
chr17	chr17	148	chr17	GTGAGCCACTGCACCTGGCCTGGGGTACAG	2	58056083	58056113	GTGAGCCACTGTGCCTGGCCNNNNNNNN
chr14	chr14	148	chr14	GTGAGCCAGTGTGCCTGGCCTGGAAGCTGC	1	35396853	35396883	GTGAGCCACTGTGCCTGGCCNNNNNNNN
chr12	chr12	148	chr12	GTGAGCCACCGTGCCTGGCCTGGTTAGCAT	1	64114630	64114660	GTGAGCCACTGTGCCTGGCCNNNNNNNN
chr11	chr11	148	chr11	ATGAGCCACTGTGCCTGGCCGGGGTTGAGT	1	91485216	91485246	GTGAGCCACTGTGCCTGGCCNNNNNNNN
chr11	chr11	148	chr11	GTGAGCCACCATGCCTGGCCAGGTTGGACA	2	17348213	17348243	GTGAGCCACTGTGCCTGGCCNNNNNNNN
chrX	chrX	147	chrX	GTGAGCCACTGCGCCTGGCCTGGTTTACCA	1	70894335	70894365	GTGAGCCACTGTGCCTGGCCNNNNNNNN
chr7	chr7	147	chr7	GTGAGCCACCGTGCCTGACCAGGATACGTG	2	148628394	148628424	GTGAGCCACTGTGCCTGGCCNNNNNNNN
chr7	chr7	147	chr7	GTGAGCCACCGCGCCTGGCCTGGTGTGGTA	2	143385924	143385954	GTGAGCCACTGTGCCTGGCCNNNNNNNN
chr7	chr7	147	chr7	ATGAGCAACTGTGCCTGGCCAGGTAGGTAT	2	139125246	139125276	GTGAGCCACTGTGCCTGGCCNNNNNNNN
chr6	chr6	147	chr6	ATGAGCCACTGTGCCTGGCCAGGAACTGTA	1	116321496	116321526	GTGAGCCACTGTGCCTGGCCNNNNNNNN
chr3	chr3	147	chr3	ATGAGCCACTGTGCCTGGCCTGGCCCAGTA	1	32371070	32371100	GTGAGCCACTGTGCCTGGCCNNNNNNNN
chr22	chr22	147	chr22	GTGAGCCACTGTGCCTGGCTGGGGTTAATT	1	49898997	49899027	GTGAGCCACTGTGCCTGGCCNNNNNNNN
chr2	chr2	147	chr2	GTGAGCCGCTGTGCCTGACCAGGCTAACAT	2	171292824	171292854	GTGAGCCACTGTGCCTGGCCNNNNNNNN
chr2	chr2	147	chr2	GTGACCCACTGTGCCTGGCCTGGGTTGTCT	1	170471329	170471359	GTGAGCCACTGTGCCTGGCCNNNNNNNN
chr20	chr20	147	chr20	ATGAGCCACCATGCCTGGCCTGGACCCTAT	3	32378765	32378795	GTGAGCCACTGTGCCTGGCCNNNNNNNN
chr16	chr16	147	chr16	GTGAGCCACTGGGCCTGGCCTGGCCAGTTT	1	30442734	30442764	GTGAGCCACTGTGCCTGGCCNNNNNNNN
chr1	chr1	147	chr1	GTGAGCCACTGCGCCTGGCCTGGAATGTAC	1	61698267	61698297	GTGAGCCACTGTGCCTGGCCNNNNNNNN
chr13	chr13	147	chr13	GTGAACCACCGTGCCTGGCCAGGGACAGGT	2	86855756	86855786	GTGAGCCACTGTGCCTGGCCNNNNNNNN
chr13	chr13	147	chr13	GTGAGCCACTGTGCCTGACCAGGTAGTTGA	1	112632563	112632593	GTGAGCCACTGTGCCTGGCCNNNNNNNN
chr1	chr1	147	chr1	ATGAGCCACTATGCCTGGCCAGGACTTTGG	2	200533204	200533234	GTGAGCCACTGTGCCTGGCCNNNNNNNN
chr1	chr1	147	chr1	GTGAGCCACTGCGCCTGGCCTGGAATGTTC	1	179270838	179270868	GTGAGCCACTGTGCCTGGCCNNNNNNNN
chr10	chr10	147	chr10	GTGAGCCACCGCGCCTGGCCTGGATGACTA	2	93714556	93714586	GTGAGCCACTGTGCCTGGCCNNNNNNNN
chr9	chr9	146	chr9	GTGAGCCACCGTGCCTGGCCAGGGTTCCAA	1	123462504	123462534	GTGAGCCACTGTGCCTGGCCNNNNNNNN
chr19	chr19	146	chr19	GTGAGCCACTGTGCCTGGTCTGGTTTGGGT	1	41871561	41871591	GTGAGCCACTGTGCCTGGCCNNNNNNNN
chr18	chr18	146	chr18	GTGAGCCACCATGCCTGGCCTGGTTGATTT	2	35561707	35561737	GTGAGCCACTGTGCCTGGCCNNNNNNNN
chr17	chr17	146	chr17	GTGAGCCACTGTGCCCGGCCAGGAACAGGA	1	57525934	57525964	GTGAGCCACTGTGCCTGGCCNNNNNNNN
chr12	chr12	146	chr12	ATGAGCCACCGTGCCTGGCCTGGGTCACTT	2	125126862	125126892	GTGAGCCACTGTGCCTGGCCNNNNNNNN
chr11	chr11	146	chr11	GTGAGCCACCGTGCCTGGCCAGGACAGAGA	1	72850632	72850662	GTGAGCCACTGTGCCTGGCCNNNNNNNN
chr11	chr11	146	chr11	GTGAGCCACTGTGCCTGGCCAGGTATAGAA	0	64336368	64336398	GTGAGCCACTGTGCCTGGCCNNNNNNNN
chr1	chr1	146	chr1	GTGAGCCACTGCGCCTGGCCTGGCAGGGAC	1	105285084	105285114	GTGAGCCACTGTGCCTGGCCNNNNNNNN
chr9	chr9	145	chr9	ATGAGCCACCATGCCTGGCCGGGATGTAAC	3	36568015	36568045	GTGAGCCACTGTGCCTGGCCNNNNNNNN
chr8	chr8	145	chr8	GTGAGTCACTGTGCCTGGCCTGGTCCTTCT	1	74661480	74661510	GTGAGCCACTGTGCCTGGCCNNNNNNNN
chr7	chr7	145	chr7	GTGAGCCACTGTGCCTAGCCTGGTTATTGT	1	130782704	130782734	GTGAGCCACTGTGCCTGGCCNNNNNNNN
chr6	chr6	145	chr6	GTGAGCCACTATGCCTGGCCAGGAACCAGT	1	33645040	33645070	GTGAGCCACTGTGCCTGGCCNNNNNNNN
chr5	chr5	145	chr5	GTGAGCCACTGTGCCTGGCCTGGAACTACT	0	87160319	87160349	GTGAGCCACTGTGCCTGGCCNNNNNNNN
chr5	chr5	145	chr5	ATGAGCCACTGTGCCTGGCCTGGCTAATTA	1	173369350	173369380	GTGAGCCACTGTGCCTGGCCNNNNNNNN
chr5	chr5	145	chr5	ATGAACCACTGTGCCTGGCCTGGGGATCAA	2	108823146	108823176	GTGAGCCACTGTGCCTGGCCNNNNNNNN
chr3	chr3	145	chr3	GTGAGCCACCATGCCTGGCCTGGACTTGGA	2	136125028	136125058	GTGAGCCACTGTGCCTGGCCNNNNNNNN
chr22	chr22	145	chr22	ATGAGCCACTGCGCCTGGCCTGGGCTGGTT	2	40712485	40712515	GTGAGCCACTGTGCCTGGCCNNNNNNNN
chr2	chr2	145	chr2	GTGAGCCACAGTGCCTGGCCAGGAAGCCTC	1	113214776	113214806	GTGAGCCACTGTGCCTGGCCNNNNNNNN
chr17	chr17	145	chr17	GTGAGCCACCATGCCTGGCCAGGAAGGGAG	2	40201607	40201637	GTGAGCCACTGTGCCTGGCCNNNNNNNN
chr17	chr17	145	chr17	GTGAGCCACCGTGCCTGGCCAGGAACGCTT	1	39692684	39692714	GTGAGCCACTGTGCCTGGCCNNNNNNNN
chr17	chr17	145	chr17	GTGAGCCACCGTGCCTGGCCAGGTTTATAT	1	35581822	35581852	GTGAGCCACTGTGCCTGGCCNNNNNNNN
chr17	chr17	145	chr17	GTGAGCCACCGTGCCTGGCCTGGTTTTTTT	1	19916972	19917002	GTGAGCCACTGTGCCTGGCCNNNNNNNN
chr17	chr17	145	chr17	GTGAGCCACCATGCCTGGCCTGGCCATCTG	2	16339642	16339672	GTGAGCCACTGTGCCTGGCCNNNNNNNN
chr1	chr1	145	chr1	GTGAGCCACCATGCCTGGCCAGGGGGGATT	2	174992146	174992176	GTGAGCCACTGTGCCTGGCCNNNNNNNN
chr3	chr3	144	chr3	ATGAGCCACTGTGCCTGGCCTGGGGCTTCT	1	142900004	142900034	GTGAGCCACTGTGCCTGGCCNNNNNNNN
chr3	chr3	144	chr3	GTGAGCCACCATGCCTGGCCTGGATTTTGT	2	138553904	138553934	GTGAGCCACTGTGCCTGGCCNNNNNNNN
chr18	chr18	144	chr18	GTGAGCCACTATGCCTGGCCAGGCTCATCT	1	24290388	24290418	GTGAGCCACTGTGCCTGGCCNNNNNNNN
chr17	chr17	144	chr17	ATGAACCACTGCGCCTGGCCTGGCTGGAGA	3	76349793	76349823	GTGAGCCACTGTGCCTGGCCNNNNNNNN
chr17	chr17	144	chr17	GTGAGCCACCATGCCTGGCCAGGAAAGAAT	2	63588476	63588506	GTGAGCCACTGTGCCTGGCCNNNNNNNN
chr1	chr1	144	chr1	ATGAGCCACTATGCCTGGCCCAGAGTTAGT	2	70277165	70277195	GTGAGCCACTGTGCCTGGCCNNNNNNNN
chr15	chr15	144	chr15	GTGAGCCACTGTGCCTGGCCAGGAATAGGG	0	80775037	80775067	GTGAGCCACTGTGCCTGGCCNNNNNNNN
chr1	chr1	144	chr1	GTGAGCCACTGTGCCTGGCCGAGTAAGAGT	0	149981857	149981887	GTGAGCCACTGTGCCTGGCCNNNNNNNN
chr10	chr10	144	chr10	GTGAGCCACCATGCCTGGCCTGGATAAGCT	2	53590044	53590074	GTGAGCCACTGTGCCTGGCCNNNNNNNN
chrX	chrX	143	chrX	ATGAGCCACTGTGCCTGGCCAGGTCTATGA	1	138116431	138116461	GTGAGCCACTGTGCCTGGCCNNNNNNNN
chr9	chr9	143	chr9	ATGAGCCACTGCGCCTGGCCAGGTTCTTCT	2	15269561	15269591	GTGAGCCACTGTGCCTGGCCNNNNNNNN
chr4	chr4	143	chr4	GTGAGCCACTGTGCCTGGCCAGGTGGTGGT	0	82921037	82921067	GTGAGCCACTGTGCCTGGCCNNNNNNNN
chr2	chr2	143	chr2	GTGAGCCACCATGCCTGGCCAGGAGTTTTA	2	231696450	231696480	GTGAGCCACTGTGCCTGGCCNNNNNNNN
chr18	chr18	143	chr18	GTGAGCCACTGTGCCCGGCCTGGAGTGTTA	1	39899463	39899493	GTGAGCCACTGTGCCTGGCCNNNNNNNN
chr17	chr17	143	chr17	ATGAGCCACTGTGCCTGGCCTGGAACCAAC	1	42940497	42940527	GTGAGCCACTGTGCCTGGCCNNNNNNNN
chr1	chr1	143	chr1	GTGAGCCACTGTACCCGGCCGGGAGTCCTT	2	68335987	68336017	GTGAGCCACTGTGCCTGGCCNNNNNNNN
chr16	chr16	143	chr16	GTGAGCCACTGTGCCTGGCCTGGTTTCACT	0	58608263	58608293	GTGAGCCACTGTGCCTGGCCNNNNNNNN
chr12	chr12	143	chr12	ATGAGCCACTGTGCCTGGCCAGGTTTTACT	1	81306821	81306851	GTGAGCCACTGTGCCTGGCCNNNNNNNN
chr10	chr10	143	chr10	GTGAGCCACCGTGCCTGGCCAGGGAAGCAT	1	74752505	74752535	GTGAGCCACTGTGCCTGGCCNNNNNNNN
chrX	chrX	142	chrX	GTGAGCCACTGTGCCTGGCCTGGTGTTGAT	0	134816601	134816631	GTGAGCCACTGTGCCTGGCCNNNNNNNN
chr6	chr6	142	chr6	GTGAGCCACTGCACCTGGCCTGGTCTGAAG	2	134149742	134149772	GTGAGCCACTGTGCCTGGCCNNNNNNNN
chr5	chr5	142	chr5	GTGAGCCACTGCGCCTGGCCAGGTATGACC	1	77886629	77886659	GTGAGCCACTGTGCCTGGCCNNNNNNNN
chr22	chr22	142	chr22	GTGAGCCACCATGCCTGGCCAGGAGATGAA	2	37285413	37285443	GTGAGCCACTGTGCCTGGCCNNNNNNNN
chr22	chr22	142	chr22	GTGAGCCATTATGCCTGGCCTGGAGTAGTA	2	24999507	24999537	GTGAGCCACTGTGCCTGGCCNNNNNNNN
chr21	chr21	142	chr21	GTGAGCCACCGTGCCTGGCCCGGTTTTATA	1	34157509	34157539	GTGAGCCACTGTGCCTGGCCNNNNNNNN
chr20	chr20	142	chr20	GTGAGCCACTGTGCCTGGCCAGGATCTTAT	0	2649197	2649227	GTGAGCCACTGTGCCTGGCCNNNNNNNN
chr19	chr19	142	chr19	GTGAGCCACTGTGCCCAGCCTGGCAAGGAA	2	49096336	49096366	GTGAGCCACTGTGCCTGGCCNNNNNNNN
chr19	chr19	142	chr19	GTGAGCCACCATGCCTGGCCAGGAGTCTAT	2	37603278	37603308	GTGAGCCACTGTGCCTGGCCNNNNNNNN
chr17	chr17	142	chr17	GTGAGCCAATGTGCCTGGCCAGGTTTTTTT	1	63748134	63748164	GTGAGCCACTGTGCCTGGCCNNNNNNNN
chr13	chr13	142	chr13	ATGAGCCACTGTGCCCAGCCAGGGCTTGGA	3	63230187	63230217	GTGAGCCACTGTGCCTGGCCNNNNNNNN
chr1	chr1	142	chr1	GTGAGCCACCATGCCTGGCCAGGTAGGAAT	2	226484153	226484183	GTGAGCCACTGTGCCTGGCCNNNNNNNN
chr11	chr11	142	chr11	ATGAGCCACCGTGCCTGGCCTGGCTATTGT	2	76849287	76849317	GTGAGCCACTGTGCCTGGCCNNNNNNNN
chr9	chr9	141	chr9	GTGAGCCACTGTGCCCGGCCAGGATTCAGC	1	136634751	136634781	GTGAGCCACTGTGCCTGGCCNNNNNNNN
chr8	chr8	141	chr8	GTGAGCTACTGTGCCTGGCCTGGTTAAAGT	1	81502147	81502177	GTGAGCCACTGTGCCTGGCCNNNNNNNN
chr7	chr7	141	chr7	GTGAGTCACTGTGCCTGGCTTGGCTTTAAA	2	7647884	7647914	GTGAGCCACTGTGCCTGGCCNNNNNNNN
chr5	chr5	141	chr5	ATGAGCCACCGTGCCTGGCCTGGATCTTCT	2	132697523	132697553	GTGAGCCACTGTGCCTGGCCNNNNNNNN
chr3	chr3	141	chr3	GTGAGCCACCATGCCTGGCCAGGATTATGT	2	68640895	68640925	GTGAGCCACTGTGCCTGGCCNNNNNNNN
chr3	chr3	141	chr3	ATGAGCTACTGTGCCTGGCCTGGTACACTA	2	142714552	142714582	GTGAGCCACTGTGCCTGGCCNNNNNNNN
chr2	chr2	141	chr2	GTGAGCCACTGTGCCTGGCCAGGCTCTTTT	0	84361780	84361810	GTGAGCCACTGTGCCTGGCCNNNNNNNN
chr18	chr18	141	chr18	GTGAGCCACCGTGCCTGACCAGGAGTAGAG	2	22159956	22159986	GTGAGCCACTGTGCCTGGCCNNNNNNNN
chr1	chr1	141	chr1	ATGAGCCACCGTACCTGGCCAGGATGTTCT	3	6226102	6226132	GTGAGCCACTGTGCCTGGCCNNNNNNNN
chr14	chr14	141	chr14	GTGAGCCACCATGCCTGGCCGGGGTTGAGT	2	68220840	68220870	GTGAGCCACTGTGCCTGGCCNNNNNNNN
chr1	chr1	141	chr1	TTGAGCCACCGTGCCTGGCCTGGTCTTCTT	2	226904930	226904960	GTGAGCCACTGTGCCTGGCCNNNNNNNN
chr1	chr1	141	chr1	GTGAGCCACCGTGCCTAGCCAGGTTCTGGA	2	223706787	223706817	GTGAGCCACTGTGCCTGGCCNNNNNNNN
chr1	chr1	141	chr1	GTGAGCCACCGTGCCTGGCCTGGCAGGGTG	1	201597105	201597135	GTGAGCCACTGTGCCTGGCCNNNNNNNN
chr1	chr1	141	chr1	ATGAGCCACCGTGCCTGGCCAGGATGGACC	2	154341192	154341222	GTGAGCCACTGTGCCTGGCCNNNNNNNN
chr11	chr11	141	chr11	ATGAGCCACCGTGCCTGGCCAGGAAATTAT	2	48053854	48053884	GTGAGCCACTGTGCCTGGCCNNNNNNNN
chr6	chr6	140	chr6	ATGAGCCACCATGCCTGGCCAGGAGCTGCT	3	100418875	100418905	GTGAGCCACTGTGCCTGGCCNNNNNNNN
chr2	chr2	140	chr2	ATGAGCCACTGTGCCTGGCCAGGTGCTTTT	1	65849505	65849535	GTGAGCCACTGTGCCTGGCCNNNNNNNN
chr1	chr1	140	chr1	GTGAGCCACCATGCCTGGCCAGGAATGTAT	2	93069096	93069126	GTGAGCCACTGTGCCTGGCCNNNNNNNN
chr18	chr18	140	chr18	GTGAGCCACTGTGCCCGGCCTGGGTTATGT	1	32122146	32122176	GTGAGCCACTGTGCCTGGCCNNNNNNNN
chr16	chr16	140	chr16	ATGAGCCACTGCACCTGGCCTGGCATGGCA	3	84513093	84513123	GTGAGCCACTGTGCCTGGCCNNNNNNNN
chr16	chr16	140	chr16	GTGAGCCACTGCGCCTAGCCAGGTTTTCTT	2	74657753	74657783	GTGAGCCACTGTGCCTGGCCNNNNNNNN
chr15	chr15	140	chr15	GTGAGCCACTGTGCCTGGCCTGGTTTTTCT	0	83883845	83883875	GTGAGCCACTGTGCCTGGCCNNNNNNNN
chr13	chr13	140	chr13	GTGAGCCACTGTGCCTGACAGAGTTTCTTA	2	63469082	63469112	GTGAGCCACTGTGCCTGGCCNNNNNNNN
chr13	chr13	140	chr13	GTGAGCCACTGTGCCTGGCCTGGCCTTTTT	0	32635621	32635651	GTGAGCCACTGTGCCTGGCCNNNNNNNN
chr1	chr1	140	chr1	GTGAGCCACTGTGCCCAGCCAGGTTCTTAC	2	235685554	235685584	GTGAGCCACTGTGCCTGGCCNNNNNNNN
chr12	chr12	140	chr12	GTGAGCCACTGTGCCTGGCCTGGTTTCCTT	0	129095631	129095661	GTGAGCCACTGTGCCTGGCCNNNNNNNN
chr8	chr8	139	chr8	ATGAGCCACCGTGCCTGGCCAGGTGTGAGG	2	81650460	81650490	GTGAGCCACTGTGCCTGGCCNNNNNNNN
chr7	chr7	139	chr7	ATGAGCCACCGTGCCTGGCCAGGAACACCT	2	148973218	148973248	GTGAGCCACTGTGCCTGGCCNNNNNNNN
chr6	chr6	139	chr6	ATGAGCCACTGTGCCTGACCTGGCCTGGTC	2	70418596	70418626	GTGAGCCACTGTGCCTGGCCNNNNNNNN
chr6	chr6	139	chr6	ATGAGCCACCATGCCTGGCCTGGGGTTAAC	3	163970252	163970282	GTGAGCCACTGTGCCTGGCCNNNNNNNN
chr5	chr5	139	chr5	GTGAGCCACTGTGCCTGGCCAGGATGTTGC	0	174631296	174631326	GTGAGCCACTGTGCCTGGCCNNNNNNNN
chr5	chr5	139	chr5	ATGAGCCACTGTGCCTGGCCTGGTAATTCT	1	168319781	168319811	GTGAGCCACTGTGCCTGGCCNNNNNNNN
chr2	chr2	139	chr2	GTGAGCCACTGAGCCTGGCCTGGAGGTATT	1	27633756	27633786	GTGAGCCACTGTGCCTGGCCNNNNNNNN
chr2	chr2	139	chr2	ATGAGCCACTGCGCCTGGCCAGGCAGATGT	2	216238295	216238325	GTGAGCCACTGTGCCTGGCCNNNNNNNN
chr2	chr2	139	chr2	ATGAGCCACTGTGCCTGGCCTGGATTAGTA	1	161276122	161276152	GTGAGCCACTGTGCCTGGCCNNNNNNNN
chr20	chr20	139	chr20	GTGAGCCACCGTGCCTGGCCGGGAGTTGTG	1	49709479	49709509	GTGAGCCACTGTGCCTGGCCNNNNNNNN
chr19	chr19	139	chr19	GTGAGCCACCGTGCCTGGCCAGGCCTGTGT	1	45898602	45898632	GTGAGCCACTGTGCCTGGCCNNNNNNNN
chr19	chr19	139	chr19	GTGAGCCACCGTGCCTGGCCTGGCCCTAGT	1	19158465	19158495	GTGAGCCACTGTGCCTGGCCNNNNNNNN
chr17	chr17	139	chr17	ATGAGCCACCGTGCCTGGCCAGGTTTCCAA	2	56944300	56944330	GTGAGCCACTGTGCCTGGCCNNNNNNNN
chr17	chr17	139	chr17	GTGAGCCACTGTGCCCAGCCAGGATTTCTT	2	2633447	2633477	GTGAGCCACTGTGCCTGGCCNNNNNNNN
chr1	chr1	139	chr1	GTGAGCCACCGTGCCTGGCCTGGTTGAGTG	1	55470792	55470822	GTGAGCCACTGTGCCTGGCCNNNNNNNN
chr1	chr1	139	chr1	GTGAGCCACTGTGCCTGGCCTGGAACTGTA	0	53964965	53964995	GTGAGCCACTGTGCCTGGCCNNNNNNNN
chr12	chr12	139	chr12	ATGAGCCACTGTGCCTGGCCAGGAGTACAT	1	95347477	95347507	GTGAGCCACTGTGCCTGGCCNNNNNNNN
chr11	chr11	139	chr11	GTGAGCCACTGTGCCCGGCCTGGTAGCTTT	1	25726145	25726175	GTGAGCCACTGTGCCTGGCCNNNNNNNN
chr10	chr10	139	chr10	GTGAGCCACCATGCCTGGCCTGGTAGTGTG	2	58765336	58765366	GTGAGCCACTGTGCCTGGCCNNNNNNNN
chr9	chr9	138	chr9	ATGAGCCACTGTGCCCGGCCTGGCGATTGA	2	90284686	90284716	GTGAGCCACTGTGCCTGGCCNNNNNNNN
chr5	chr5	138	chr5	GTGAGCCACTGTGCCTGGCCAGGATGTAGA	0	19630221	19630251	GTGAGCCACTGTGCCTGGCCNNNNNNNN
chr5	chr5	138	chr5	ATGAGCCACTGTGCCCAGCCGGGGTGAGTA	3	120307954	120307984	GTGAGCCACTGTGCCTGGCCNNNNNNNN
chr4	chr4	138	chr4	ATAAGCCACTGTGCCTGGCCTGGAATTTTT	2	173349420	173349450	GTGAGCCACTGTGCCTGGCCNNNNNNNN
chr22	chr22	138	chr22	GTGAGCCACTGTGCCTGGCCAAGCAGCAAT	0	11607262	11607292	GTGAGCCACTGTGCCTGGCCNNNNNNNN
chr17	chr17	138	chr17	GTGAGCCACCGTACCTGGCCAGGATCTCAC	2	58482416	58482446	GTGAGCCACTGTGCCTGGCCNNNNNNNN
chr14	chr14	138	chr14	GTGAGCCACCATGCCTGGCCAGGATGCACT	2	101944749	101944779	GTGAGCCACTGTGCCTGGCCNNNNNNNN
chr1	chr1	138	chr1	ATGAGCCACTGTGCCTGGCCAGGACGGGTT	1	227739304	227739334	GTGAGCCACTGTGCCTGGCCNNNNNNNN
chr6	chr6	137	chr6	ATGAGCCACTGCGCCTGGCCAGGTCACCCA	2	39529494	39529524	GTGAGCCACTGTGCCTGGCCNNNNNNNN
chr5	chr5	137	chr5	GTGAACCACTGTGCCTGGCCTGGCTGTTTC	1	80707430	80707460	GTGAGCCACTGTGCCTGGCCNNNNNNNN
chr3	chr3	137	chr3	GTGAGCCACCGTGCCTGGCCTGGTCAGGTA	1	43240739	43240769	GTGAGCCACTGTGCCTGGCCNNNNNNNN
chr2	chr2	137	chr2	GTGAGCCACTGTGCCTGGCCTGGGGGCAAC	0	235331563	235331593	GTGAGCCACTGTGCCTGGCCNNNNNNNN
chr19	chr19	137	chr19	GTGAACCACTGTGCCTGGCCTGGAAACAAG	1	17961284	17961314	GTGAGCCACTGTGCCTGGCCNNNNNNNN
chr1	chr1	137	chr1	ATGAGCCACTGTGCCTGGCCTGGATTTCTT	1	66994352	66994382	GTGAGCCACTGTGCCTGGCCNNNNNNNN
chr12	chr12	137	chr12	ATGAGCCACTGTGCCTGGCCAGGAGAGGAA	1	68301958	68301988	GTGAGCCACTGTGCCTGGCCNNNNNNNN
chr1	chr1	137	chr1	GTGAGCCACTGTGCCTGGCCTGGCTTGGCT	0	173979355	173979385	GTGAGCCACTGTGCCTGGCCNNNNNNNN
chr6	chr6	136	chr6	ATGAGCCACCGCGCCTGGCCAGGGGTGGGC	3	32636803	32636833	GTGAGCCACTGTGCCTGGCCNNNNNNNN
chr6	chr6	136	chr6	GTGAGCCACAGTGCCTGGCCTGGAGTGTTT	1	136760677	136760707	GTGAGCCACTGTGCCTGGCCNNNNNNNN
chr3	chr3	136	chr3	ATGAGCCACTGTGCCTGGCCAGGTCTTGTT	1	137554606	137554636	GTGAGCCACTGTGCCTGGCCNNNNNNNN
chr2	chr2	136	chr2	GTGAGCCACTGTGCCAGGCCAGGCTAGCAG	1	55210139	55210169	GTGAGCCACTGTGCCTGGCCNNNNNNNN
chr17	chr17	136	chr17	ATGAGCCACTGTGCCTGGCCTGGTTTGTAC	1	57333722	57333752	GTGAGCCACTGTGCCTGGCCNNNNNNNN
chr1	chr1	136	chr1	ATGAGCCACTGCACCTGGCCGGGTCTTGCT	3	74865677	74865707	GTGAGCCACTGTGCCTGGCCNNNNNNNN
chr16	chr16	136	chr16	ATGAGCCACCATGCCTGGCCAGGATAATGC	3	28224023	28224053	GTGAGCCACTGTGCCTGGCCNNNNNNNN
chr15	chr15	136	chr15	ATGAGCCACGGTGCCTGGCCTGGTAATTGC	2	84925198	84925228	GTGAGCCACTGTGCCTGGCCNNNNNNNN
chr14	chr14	136	chr14	ATGAGCCACTGTGCCTGGCCAGGATTTCTT	1	34676390	34676420	GTGAGCCACTGTGCCTGGCCNNNNNNNN
chr13	chr13	136	chr13	ATGAGCCACTGTGCCCAGCCAGGATAAGAT	3	77108972	77109002	GTGAGCCACTGTGCCTGGCCNNNNNNNN
chr1	chr1	136	chr1	ATGAGCCACTGTGCCTGGCATGAGCTGAGT	2	231243597	231243627	GTGAGCCACTGTGCCTGGCCNNNNNNNN
chr12	chr12	136	chr12	ATGAGCCACCGTGCCTGGCCAGGAATGGAC	2	14298182	14298212	GTGAGCCACTGTGCCTGGCCNNNNNNNN
chr1	chr1	136	chr1	GTGAGCCACTGTGCCTGGCCTGGCTCTGAA	0	167477808	167477838	GTGAGCCACTGTGCCTGGCCNNNNNNNN
chr1	chr1	136	chr1	ATGAGCCACAGTGCCTGGCCAGGTAAATCT	2	117980511	117980541	GTGAGCCACTGTGCCTGGCCNNNNNNNN
chr1	chr1	136	chr1	GTGAGCCACCGTGCCTGGCCTGGAACAGAT	1	110020965	110020995	GTGAGCCACTGTGCCTGGCCNNNNNNNN
chr1	chr1	136	chr1	GTGAGCCACTGTGCCTGGCCTGGCTAATGT	0	10479030	10479060	GTGAGCCACTGTGCCTGGCCNNNNNNNN
chr10	chr10	136	chr10	GTGAGCCATTGCGCCTGGCCTGGCCTTCTT	2	55969375	55969405	GTGAGCCACTGTGCCTGGCCNNNNNNNN
chr10	chr10	136	chr10	ATGAGCCACCATGCCTGGCCAGGTTGACAC	3	18040477	18040507	GTGAGCCACTGTGCCTGGCCNNNNNNNN
chr10	chr10	136	chr10	ATGAGCCAATGCGCCTGGCCAGGATCATGA	3	112794264	112794294	GTGAGCCACTGTGCCTGGCCNNNNNNNN
chr9	chr9	135	chr9	ATGAGCCACCGCGCCTGGCCTGGCCTTATA	3	98981161	98981191	GTGAGCCACTGTGCCTGGCCNNNNNNNN
chr5	chr5	135	chr5	GTGAGCCACCATGCCTGGCCTGGTCTCTGA	2	36374700	36374730	GTGAGCCACTGTGCCTGGCCNNNNNNNN
chr5	chr5	135	chr5	ATGAGCCACTGTGCCTGGCTAGGAATACAT	2	141884566	141884596	GTGAGCCACTGTGCCTGGCCNNNNNNNN
chr4	chr4	135	chr4	GTGAGCCACTGTGCCCAGCCAGGCATTTGT	2	109224647	109224677	GTGAGCCACTGTGCCTGGCCNNNNNNNN
chr21	chr21	135	chr21	GTGAGCCACTGTGCCTGGCCTGGTTTTATT	0	36042970	36043000	GTGAGCCACTGTGCCTGGCCNNNNNNNN
chr19	chr19	135	chr19	GTGAGCCACTGTGCCCGGCCTGGAGTTTGT	1	16894749	16894779	GTGAGCCACTGTGCCTGGCCNNNNNNNN
chr17	chr17	135	chr17	GTGAGCCACTGTGCCTGGTCGGGTCTGTCT	1	8992942	8992972	GTGAGCCACTGTGCCTGGCCNNNNNNNN
chr15	chr15	135	chr15	GTGAGCCACCATGCCTGGCCAGGGTGTTTT	2	72478085	72478115	GTGAGCCACTGTGCCTGGCCNNNNNNNN
chr13	chr13	135	chr13	ATGAGCCACCGTGCCTGGCCAGGGTAAACA	2	38933090	38933120	GTGAGCCACTGTGCCTGGCCNNNNNNNN
chr11	chr11	135	chr11	GTGACCCACTGTGCCTGGCCAGGAGATGAC	1	125439156	125439186	GTGAGCCACTGTGCCTGGCCNNNNNNNN
chr8	chr8	134	chr8	GTGAGTCACTGTGCCTGGCCAGGTCTTAAA	1	99210876	99210906	GTGAGCCACTGTGCCTGGCCNNNNNNNN
chr4	chr4	134	chr4	GTGAACCACCGTGCCTGGCCGGGCTTTCTA	2	128066756	128066786	GTGAGCCACTGTGCCTGGCCNNNNNNNN
chr22	chr22	134	chr22	ATGAGCCACTGCACCTGGCCTGGCCTTTAT	3	20899220	20899250	GTGAGCCACTGTGCCTGGCCNNNNNNNN
chr2	chr2	134	chr2	GTGAGCCACCGTGCCTGACCAGGATTAAGT	2	135968942	135968972	GTGAGCCACTGTGCCTGGCCNNNNNNNN
chr21	chr21	134	chr21	GTGAGCCACTGCACCTGGCCTGGTATTGGG	2	31690192	31690222	GTGAGCCACTGTGCCTGGCCNNNNNNNN
chr21	chr21	134	chr21	GTGAGCCACTGCGCCTGGCCTGGATACGCC	1	29426218	29426248	GTGAGCCACTGTGCCTGGCCNNNNNNNN
chr21	chr21	134	chr21	GTGAGCCACTGCGCCTGGCCTGGAATACTA	1	21536669	21536699	GTGAGCCACTGTGCCTGGCCNNNNNNNN
chr2	chr2	134	chr2	ATGAGCCACTGTGCCTGGCCAGGAATACCA	1	118964595	118964625	GTGAGCCACTGTGCCTGGCCNNNNNNNN
chr19	chr19	134	chr19	GTGAGCCACTGTGCCCAGCCTGGAGTTGAA	2	49137330	49137360	GTGAGCCACTGTGCCTGGCCNNNNNNNN
chr1	chr1	134	chr1	ATGAGCCACCATGCCTGGCCAGGTATCTTA	3	77923274	77923304	GTGAGCCACTGTGCCTGGCCNNNNNNNN
chr17	chr17	134	chr17	GTGAGCCACCGTGCCTGGCCAGGTGATGGG	1	39937839	39937869	GTGAGCCACTGTGCCTGGCCNNNNNNNN
chr1	chr1	134	chr1	GTGAGCCACTGCGCCTGGCCAGGGAGCTCA	1	73397929	73397959	GTGAGCCACTGTGCCTGGCCNNNNNNNN
chr16	chr16	134	chr16	GTGAGCCACTGTGCCTGGCCAGGATGTTAG	0	4719871	4719901	GTGAGCCACTGTGCCTGGCCNNNNNNNN
chr15	chr15	134	chr15	GTGAGCCACCGTGCCTGGCCAGGGGATGCT	1	94732523	94732553	GTGAGCCACTGTGCCTGGCCNNNNNNNN
chr1	chr1	134	chr1	ATGAGCCACCGTGCCTGGCCTGGGTTTAAT	2	159084479	159084509	GTGAGCCACTGTGCCTGGCCNNNNNNNN
chr10	chr10	134	chr10	GTGAGCCACCGTGCCTGACCAGGATTGGAA	2	80762307	80762337	GTGAGCCACTGTGCCTGGCCNNNNNNNN
chrX	chrX	133	chrX	GTGAGCCACTGTGCCTGGCCAGGGTTGTAC	0	54587959	54587989	GTGAGCCACTGTGCCTGGCCNNNNNNNN
chr5	chr5	133	chr5	GTGAGCCACCGTGCCTGGCCTGGCCCTCAT	1	168436122	168436152	GTGAGCCACTGTGCCTGGCCNNNNNNNN
chr3	chr3	133	chr3	GTGAGCCACTGCACCTGGCCGGGTAGAGTG	2	13720771	13720801	GTGAGCCACTGTGCCTGGCCNNNNNNNN
chr2	chr2	133	chr2	ATGAGCCACCATGCCTGGCCAGGCTTTGGA	3	100922287	100922317	GTGAGCCACTGTGCCTGGCCNNNNNNNN
chr2	chr2	133	chr2	GTGAGCCACTGTGCCTGGCCAGGCCTGATC	0	100076956	100076986	GTGAGCCACTGTGCCTGGCCNNNNNNNN
chr20	chr20	133	chr20	ATGAGCCACTGTACCTGGCCTGGAGGACAT	2	35689195	35689225	GTGAGCCACTGTGCCTGGCCNNNNNNNN
chr1	chr1	133	chr1	ATGAGCCACTGTGCCTGGTCTGGGCTGAAC	2	94832681	94832711	GTGAGCCACTGTGCCTGGCCNNNNNNNN
chr19	chr19	133	chr19	GTGAGCCACTGTGCCCAGCCAGGGTGGTTA	2	4341350	4341380	GTGAGCCACTGTGCCTGGCCNNNNNNNN
chr1	chr1	133	chr1	ATGAGCCACTGTGCCTGGCCCAGGTTACAT	1	64411517	64411547	GTGAGCCACTGTGCCTGGCCNNNNNNNN
chr14	chr14	133	chr14	GTGAGCCACCATGCCTGGCCAGGTCTCAGT	2	66887297	66887327	GTGAGCCACTGTGCCTGGCCNNNNNNNN
chr14	chr14	133	chr14	GTGAGCCACGGTGCCTGGCCAGGACCCTCC	1	102536899	102536929	GTGAGCCACTGTGCCTGGCCNNNNNNNN
chr1	chr1	133	chr1	GTGAGCCACCATGCCTGGCCCGGTTATGAC	2	150885828	150885858	GTGAGCCACTGTGCCTGGCCNNNNNNNN
chr7	chr7	132	chr7	GTGAGACACTGTGCCTGGCCTGGAACATTA	1	69623511	69623541	GTGAGCCACTGTGCCTGGCCNNNNNNNN
chr7	chr7	132	chr7	GTGAGCCACTGTGCCTGGCCAGGGATAGCA	0	138600305	138600335	GTGAGCCACTGTGCCTGGCCNNNNNNNN
chr20	chr20	132	chr20	GTGAGCCACCGTGCCTGGCCTGGAATGAAT	1	2400881	2400911	GTGAGCCACTGTGCCTGGCCNNNNNNNN
chr17	chr17	132	chr17	GTGAGCCACCGTGCCTGGCCTGGCTCCACC	1	78642549	78642579	GTGAGCCACTGTGCCTGGCCNNNNNNNN
chr17	chr17	132	chr17	GTGAGCCACTGTGCCTGGCCTGGTGTCCTT	0	51315136	51315166	GTGAGCCACTGTGCCTGGCCNNNNNNNN
chr1	chr1	132	chr1	ATGAGCCACCATGCCTGGCCTGGGCTAGTC	3	737462	737492	GTGAGCCACTGTGCCTGGCCNNNNNNNN
chr13	chr13	132	chr13	ATGAGACACTGTGCCTGGCCAGGAAAACTT	2	42434532	42434562	GTGAGCCACTGTGCCTGGCCNNNNNNNN
chr1	chr1	132	chr1	GTGAGCCACTGTGCCTGGCCAGGGAAGATC	0	174102335	174102365	GTGAGCCACTGTGCCTGGCCNNNNNNNN
chr1	chr1	132	chr1	GTGAGCCACTGAGCCTAGCCAGGATATCTG	2	151487589	151487619	GTGAGCCACTGTGCCTGGCCNNNNNNNN
chr9	chr9	131	chr9	ATGAGCCACCATGCCTGGCCTGGAGTGGGT	3	125386642	125386672	GTGAGCCACTGTGCCTGGCCNNNNNNNN
chr8	chr8	131	chr8	GTGAGCCACTGTGCCCAGCCAGGCAAAGGT	2	124491063	124491093	GTGAGCCACTGTGCCTGGCCNNNNNNNN
chr8	chr8	131	chr8	GTGAGCCACCACGCCTGGCCAGGAATACAT	3	109437193	109437223	GTGAGCCACTGTGCCTGGCCNNNNNNNN
chr7	chr7	131	chr7	ATGAGCCACTGTGCCTGGCCTGGCCAAATG	1	149324369	149324399	GTGAGCCACTGTGCCTGGCCNNNNNNNN
chr6	chr6	131	chr6	GTGAGCCACAGTGCCTGGCCTGGAATGCCT	1	33401984	33402014	GTGAGCCACTGTGCCTGGCCNNNNNNNN
chr5	chr5	131	chr5	GTGAGCCACCATGCCTGGCCTGGGGTACTT	2	69520571	69520601	GTGAGCCACTGTGCCTGGCCNNNNNNNN
chr3	chr3	131	chr3	GTGAGCCACTGTGCCTGGCCGGGGATCCTT	0	86344730	86344760	GTGAGCCACTGTGCCTGGCCNNNNNNNN
chr3	chr3	131	chr3	ATGAGCCACTGCACCTGGCCGGGAACATGC	3	130492621	130492651	GTGAGCCACTGTGCCTGGCCNNNNNNNN
chr22	chr22	131	chr22	GTGAGCCACTCTGCCTGGCCAGGTAAGTAT	1	32145193	32145223	GTGAGCCACTGTGCCTGGCCNNNNNNNN
chr17	chr17	131	chr17	GTGAGCCACTGTGCCTGGCCAGGTTCAAGC	0	82473630	82473660	GTGAGCCACTGTGCCTGGCCNNNNNNNN
chr17	chr17	131	chr17	GTGAGCCACTGCGCCTGGCCAGGGTTTTGC	1	80164010	80164040	GTGAGCCACTGTGCCTGGCCNNNNNNNN
chr17	chr17	131	chr17	GTGAGCCACTGCGCCCAGCCAGGTAATGGA	3	78745601	78745631	GTGAGCCACTGTGCCTGGCCNNNNNNNN
chr17	chr17	131	chr17	GTGAGCCACCATGCCTAGCCTGGTGTCTAT	3	62084303	62084333	GTGAGCCACTGTGCCTGGCCNNNNNNNN
chr17	chr17	131	chr17	GTGAGCCACTGCGCCTGGCCTGGATGTCCT	1	45206129	45206159	GTGAGCCACTGTGCCTGGCCNNNNNNNN
chr16	chr16	131	chr16	ATGAGCCACTATGCCTAGCCTGGTTTGAGT	3	46622727	46622757	GTGAGCCACTGTGCCTGGCCNNNNNNNN
chr13	chr13	131	chr13	ATGAGCCACCGTGCCTGGCCGGGGATCACC	2	88011230	88011260	GTGAGCCACTGTGCCTGGCCNNNNNNNN
chr1	chr1	131	chr1	ATGAGCCACTGTGCCCAGCCAGGTTTGTTT	3	28339323	28339353	GTGAGCCACTGTGCCTGGCCNNNNNNNN
chr12	chr12	131	chr12	GTGAGCCACCGTGCCTGGCCAGGAGTATAG	1	57433790	57433820	GTGAGCCACTGTGCCTGGCCNNNNNNNN
chr1	chr1	131	chr1	ATGAGCCACCGCGCCTGGCCAGGGGCTGGA	3	23625143	23625173	GTGAGCCACTGTGCCTGGCCNNNNNNNN
chr8	chr8	130	chr8	GTGAGCCACTGTGCCTGGCCAGGTTCTGGG	0	70800765	70800795	GTGAGCCACTGTGCCTGGCCNNNNNNNN
chr8	chr8	130	chr8	ATGAGCCACCGTGCCTGGCCTGGATTTTTG	2	28960219	28960249	GTGAGCCACTGTGCCTGGCCNNNNNNNN
chr8	chr8	130	chr8	GTGAGCCACCGTGCCTGGCCTGGACAGTGT	1	144371416	144371446	GTGAGCCACTGTGCCTGGCCNNNNNNNN
chr6	chr6	130	chr6	GTGAGCCACCGTGCCTGGCCTGGTTCTAAG	1	75693964	75693994	GTGAGCCACTGTGCCTGGCCNNNNNNNN
chr5	chr5	130	chr5	ATGAGCCACTGTGCCTGGCCTGGGGCCTGG	1	139728571	139728601	GTGAGCCACTGTGCCTGGCCNNNNNNNN
chr2	chr2	130	chr2	GTGAGCCACTGTGCCTGGCCTGGGGTTAAT	0	48534048	48534078	GTGAGCCACTGTGCCTGGCCNNNNNNNN
chr2	chr2	130	chr2	GTGAGCTACTGTGCCTGGCCTGGCCTGTGT	1	203452669	203452699	GTGAGCCACTGTGCCTGGCCNNNNNNNN
chr19	chr19	130	chr19	GTGAGCCACAGTGCCTGGCCTGGGCTCAAT	1	49345736	49345766	GTGAGCCACTGTGCCTGGCCNNNNNNNN
chr19	chr19	130	chr19	ATGAGCCACTGCACCCGGCCAGGTTTTTTT	4	14211556	14211586	GTGAGCCACTGTGCCTGGCCNNNNNNNN
chr1	chr1	130	chr1	CTGAGCCACTGTGCCTGGCCAGGAAGACTT	1	89580999	89581029	GTGAGCCACTGTGCCTGGCCNNNNNNNN
chr18	chr18	130	chr18	GTGAGCCACCATGCCTGGCCAGGCCTGTAT	2	32793050	32793080	GTGAGCCACTGTGCCTGGCCNNNNNNNN
chr1	chr1	130	chr1	GTGAGCCACCATGCCTGGCCTGGCACTATT	2	76708233	76708263	GTGAGCCACTGTGCCTGGCCNNNNNNNN
chr17	chr17	130	chr17	ATGAGCCACTGTGCCTGGCCTGGGGTTTCT	1	63810370	63810400	GTGAGCCACTGTGCCTGGCCNNNNNNNN
chr17	chr17	130	chr17	GTGAGCCATCGTGCCTGGCCAGGAATACAT	2	21071746	21071776	GTGAGCCACTGTGCCTGGCCNNNNNNNN
chr14	chr14	130	chr14	GTGAGCCACTGCGCCTGGCCTGGTTTTGCA	1	99844188	99844218	GTGAGCCACTGTGCCTGGCCNNNNNNNN
chr13	chr13	130	chr13	GTGAGCCACGGTGCCTGGCCAGGTATCTTT	1	28114952	28114982	GTGAGCCACTGTGCCTGGCCNNNNNNNN
chr1	chr1	130	chr1	GTGAGCCACCATGCCTGGCCAGGAATCTTA	2	155523202	155523232	GTGAGCCACTGTGCCTGGCCNNNNNNNN
chr11	chr11	130	chr11	ATGAGCCACTGTGCCTGGCCAGGACCTATC	1	130396794	130396824	GTGAGCCACTGTGCCTGGCCNNNNNNNN
chr11	chr11	130	chr11	ATGAGCCACCGTGCCTGGCCTGGAGTTGAT	2	128724224	128724254	GTGAGCCACTGTGCCTGGCCNNNNNNNN
chr10	chr10	130	chr10	GTGAGCCACTGTTCCTGGCCAGGAATGAGA	1	96715988	96716018	GTGAGCCACTGTGCCTGGCCNNNNNNNN
chr10	chr10	130	chr10	GTGAGCCACTGTGCCTGGCCAGGATTCCAC	0	27330777	27330807	GTGAGCCACTGTGCCTGGCCNNNNNNNN
chr10	chr10	130	chr10	ATGAGCCACTGTACCTGGCCAGGCTTGCTC	2	112924770	112924800	GTGAGCCACTGTGCCTGGCCNNNNNNNN
chr9	chr9	129	chr9	ATGAGCCACTGTGCCTGGCCAGGTCTCAAT	1	127390992	127391022	GTGAGCCACTGTGCCTGGCCNNNNNNNN
chr8	chr8	129	chr8	GTGAGCCACTGCACCTGGCCTGGAACTATA	2	66603024	66603054	GTGAGCCACTGTGCCTGGCCNNNNNNNN
chr7	chr7	129	chr7	ATGAGCCACCATGCCTGGCCTGGTCTAAGG	3	122680421	122680451	GTGAGCCACTGTGCCTGGCCNNNNNNNN
chr5	chr5	129	chr5	ATGACCCACTGTGCCTGGCCAGGATCTTTT	2	68166891	68166921	GTGAGCCACTGTGCCTGGCCNNNNNNNN
chr21	chr21	129	chr21	GTGAGCCACTGCGCCTGGCCAGGGGTTGAG	1	16482155	16482185	GTGAGCCACTGTGCCTGGCCNNNNNNNN
chr19	chr19	129	chr19	GTGAGCCACTGTGCCTGGCCTGGATGTTTC	0	55843396	55843426	GTGAGCCACTGTGCCTGGCCNNNNNNNN
chr19	chr19	129	chr19	ATGAGCCACTGTGCCTGGCCAGGTTCCTGC	1	44169290	44169320	GTGAGCCACTGTGCCTGGCCNNNNNNNN
chr19	chr19	129	chr19	GTGAGCCACTGTGCCTAGCCAGGAGCTGGC	1	38400254	38400284	GTGAGCCACTGTGCCTGGCCNNNNNNNN
chr1	chr1	129	chr1	ATGAGCCACCATGCCTGGCCTGGAACTTAG	3	77266529	77266559	GTGAGCCACTGTGCCTGGCCNNNNNNNN
chr16	chr16	129	chr16	GTGAGCCACTGCACCTGGCCGGGTCCATAT	2	30393664	30393694	GTGAGCCACTGTGCCTGGCCNNNNNNNN
chr14	chr14	129	chr14	GTGAGCCACCATGCCTGGCCAGGGCTGGGT	2	67984216	67984246	GTGAGCCACTGTGCCTGGCCNNNNNNNN
chr1	chr1	129	chr1	GTGAGCCACTGTGCCTGGCCAGGATTTGGG	0	154387726	154387756	GTGAGCCACTGTGCCTGGCCNNNNNNNN
chr1	chr1	129	chr1	ATGAGCCATTGTGCCTGGCCAGGATAAAAA	2	145953194	145953224	GTGAGCCACTGTGCCTGGCCNNNNNNNN
chr11	chr11	129	chr11	ATGAGCCACTGTGCCTGGCCAGGGCCTTCA	1	2755538	2755568	GTGAGCCACTGTGCCTGGCCNNNNNNNN
chr10	chr10	129	chr10	GTGAGCCACTGTGCCTGGCCAGGACTGGGT	0	14062771	14062801	GTGAGCCACTGTGCCTGGCCNNNNNNNN
chr9	chr9	128	chr9	GTGAGCCACCGCGCCTGGCCAGGATGCTCT	2	131360951	131360981	GTGAGCCACTGTGCCTGGCCNNNNNNNN
chr7	chr7	128	chr7	GTGAGCCACCGTGCCTAGCCAGGCTGAGTA	2	156718107	156718137	GTGAGCCACTGTGCCTGGCCNNNNNNNN
chr7	chr7	128	chr7	ATGAGCCACTGTGCCTGGCCGGGTAGGTAT	1	139158021	139158051	GTGAGCCACTGTGCCTGGCCNNNNNNNN
chr5	chr5	128	chr5	ATGAGCCACTGTGCCTGGCCTGGAATTCCC	1	55574286	55574316	GTGAGCCACTGTGCCTGGCCNNNNNNNN
chr3	chr3	128	chr3	GTGAGCCACTGCGCCTGGCCTGGATATGTT	1	63688752	63688782	GTGAGCCACTGTGCCTGGCCNNNNNNNN
chr3	chr3	128	chr3	GTGAGCCACCATGCCTGGCCCGGGTGCCAA	2	177258980	177259010	GTGAGCCACTGTGCCTGGCCNNNNNNNN
chr2	chr2	128	chr2	ATGAGCCACTGTGCCTGGCCAGGTATCTTT	1	63783120	63783150	GTGAGCCACTGTGCCTGGCCNNNNNNNN
chr22	chr22	128	chr22	ATGAGCCACTGTGCCTGGCCAGGCTTTGGA	1	34160128	34160158	GTGAGCCACTGTGCCTGGCCNNNNNNNN
chr22	chr22	128	chr22	GTGAGCCACCATGCCTGGCCTGGTGGTTCC	2	23746486	23746516	GTGAGCCACTGTGCCTGGCCNNNNNNNN
chr2	chr2	128	chr2	ATGAGCCACCGTGCCTGGCCTGGTTTTTTC	2	164870483	164870513	GTGAGCCACTGTGCCTGGCCNNNNNNNN
chr20	chr20	128	chr20	GTGAGCCACTGTGCCTGGCCAGGAATATTA	0	22389200	22389230	GTGAGCCACTGTGCCTGGCCNNNNNNNN
chr19	chr19	128	chr19	GTGAGCCACCATGCCTGGCCTGGATTTGCA	2	31123099	31123129	GTGAGCCACTGTGCCTGGCCNNNNNNNN
chr17	chr17	128	chr17	ATGAGCCACTGTGCCTGGCCTGGCAATTTA	1	5239491	5239521	GTGAGCCACTGTGCCTGGCCNNNNNNNN
chr17	chr17	128	chr17	GTGAGCCACCATGCCTGGCCTGGACAATTT	2	20763007	20763037	GTGAGCCACTGTGCCTGGCCNNNNNNNN
chr16	chr16	128	chr16	GTGAGCCACTGTGCCTGGCCAGGAGGTGGA	0	23802116	23802146	GTGAGCCACTGTGCCTGGCCNNNNNNNN
chr1	chr1	128	chr1	ATGAGCCACTGTGCCCAGCCGGGAGTATAT	3	62074671	62074701	GTGAGCCACTGTGCCTGGCCNNNNNNNN
chr15	chr15	128	chr15	AGGAGCCACTGTGCCTGGCCAGGACTTTTT	2	67704369	67704399	GTGAGCCACTGTGCCTGGCCNNNNNNNN
chr15	chr15	128	chr15	CTGAGCCACCGTGCCTGGCCGGGCTTTAAC	2	65677488	65677518	GTGAGCCACTGTGCCTGGCCNNNNNNNN
chr12	chr12	128	chr12	GTGAGCCACTGTGCCTGGCCTGGGATCATT	0	76565902	76565932	GTGAGCCACTGTGCCTGGCCNNNNNNNN
chr12	chr12	128	chr12	ATGAGCCACTGTGTCTGGCCTGGATTTCAT	2	70293438	70293468	GTGAGCCACTGTGCCTGGCCNNNNNNNN
chr1	chr1	128	chr1	ATGAGCCACCATGCCTGGCCGGGAAGATTC	3	159878462	159878492	GTGAGCCACTGTGCCTGGCCNNNNNNNN
chrX	chrX	127	chrX	ATGAGCCACCATGCCTGGCCTGGAGGGACA	3	103110799	103110829	GTGAGCCACTGTGCCTGGCCNNNNNNNN
chr6	chr6	127	chr6	ATGAGCCACTGTGCCTGGCTAGGCTCATTT	2	89703217	89703247	GTGAGCCACTGTGCCTGGCCNNNNNNNN
chr6	chr6	127	chr6	ATGAGCCACTGTGCCTGGCCAGGACCATAT	1	31757949	31757979	GTGAGCCACTGTGCCTGGCCNNNNNNNN
chr6	chr6	127	chr6	CTGAGCCACTGTGCCTGGCCAGGGGGACAC	1	30575777	30575807	GTGAGCCACTGTGCCTGGCCNNNNNNNN
chr3	chr3	127	chr3	GTGAGCCACCATGCCTGGCCTGGTCTATAT	2	46765358	46765388	GTGAGCCACTGTGCCTGGCCNNNNNNNN
chr2	chr2	127	chr2	ATGAGCCACTGCGCCTGGCCTGGAACAATT	2	74939062	74939092	GTGAGCCACTGTGCCTGGCCNNNNNNNN
chr2	chr2	127	chr2	GTGAGCCACTGTGCCTGGCCAGGACTTGTC	0	201181526	201181556	GTGAGCCACTGTGCCTGGCCNNNNNNNN
chr21	chr21	127	chr21	ATGAGCCACTGCGCCTGGCCTGGTGTGGTT	2	41570469	41570499	GTGAGCCACTGTGCCTGGCCNNNNNNNN
chr1	chr1	127	chr1	GTGAGCCACTGTGCCTGGCCTGGATATTAC	0	81570668	81570698	GTGAGCCACTGTGCCTGGCCNNNNNNNN
chr1	chr1	127	chr1	GTGAGCCACTGCACCTGGCCTGGTCATTGT	2	75168506	75168536	GTGAGCCACTGTGCCTGGCCNNNNNNNN
chr17	chr17	127	chr17	ATGAGCCACTGCGCCTGGCCGGGTGTTCCA	2	43997318	43997348	GTGAGCCACTGTGCCTGGCCNNNNNNNN
chr15	chr15	127	chr15	GTGAGCCACTGTGCCTGGCCAGGTTTTACT	0	74757942	74757972	GTGAGCCACTGTGCCTGGCCNNNNNNNN
chr15	chr15	127	chr15	ATGAGCCACTGTGCCTGGCCAGGATTTTCT	1	68148705	68148735	GTGAGCCACTGTGCCTGGCCNNNNNNNN
chr14	chr14	127	chr14	GTGAGCCACTGTGCCTGGCCTGGAATTCAT	0	39156192	39156222	GTGAGCCACTGTGCCTGGCCNNNNNNNN
chr12	chr12	127	chr12	GTGAGCCATCGTGCCTGGCCTGGCTTGCTA	2	49445804	49445834	GTGAGCCACTGTGCCTGGCCNNNNNNNN
chr1	chr1	127	chr1	GTGAGCCACTGTGCCTGGCCGAGTTGTACA	0	229581264	229581294	GTGAGCCACTGTGCCTGGCCNNNNNNNN
chr1	chr1	127	chr1	GTAAGCCACTGCGCCTGGCCGGGAATCTCT	2	20509785	20509815	GTGAGCCACTGTGCCTGGCCNNNNNNNN
chr1	chr1	127	chr1	GTGAGCCACTGTGCCTGGCCGGGAGAAAAC	0	174775592	174775622	GTGAGCCACTGTGCCTGGCCNNNNNNNN
chrX	chrX	126	chrX	ATGAGCCACTGCGCCTGGCCAGGTGCAGGA	2	6761894	6761924	GTGAGCCACTGTGCCTGGCCNNNNNNNN
chr7	chr7	126	chr7	TTGAGCCACTGTGCCTGGCCAGGGAGGACT	1	64559761	64559791	GTGAGCCACTGTGCCTGGCCNNNNNNNN
chr6	chr6	126	chr6	GTGAGCCACTGTGCCCGGCCTGGCGTTATC	1	44033325	44033355	GTGAGCCACTGTGCCTGGCCNNNNNNNN
chr4	chr4	126	chr4	GTGAGCCACTGTGCCTGGCCAGGCTTTTTA	0	144220051	144220081	GTGAGCCACTGTGCCTGGCCNNNNNNNN
chr20	chr20	126	chr20	GTGAGCCACTATGCCTGGCCAGGTCTTCTG	1	35313887	35313917	GTGAGCCACTGTGCCTGGCCNNNNNNNN
chr1	chr1	126	chr1	ATGAGCCACTGTGCCTGGCCCAGAGGGGGT	1	84931733	84931763	GTGAGCCACTGTGCCTGGCCNNNNNNNN
chr14	chr14	126	chr14	ATGAGCCACTATGCCTAGCCAGGTGTTGCT	3	102295953	102295983	GTGAGCCACTGTGCCTGGCCNNNNNNNN
chr12	chr12	126	chr12	GTGAGCCACCGTGCCTGGCCTGGAATGACC	1	48898590	48898620	GTGAGCCACTGTGCCTGGCCNNNNNNNN
chr11	chr11	126	chr11	ATGAGCCACCGTGCCTGGCCAGGATATAGT	2	78047401	78047431	GTGAGCCACTGTGCCTGGCCNNNNNNNN
chr10	chr10	126	chr10	GTGAGCCACTGTGCCTGGCCAGGTATGGTA	0	112892624	112892654	GTGAGCCACTGTGCCTGGCCNNNNNNNN
chr9	chr9	125	chr9	GTGAGCCACTGTGCCTGGCCAGGTTCTTAC	0	97266366	97266396	GTGAGCCACTGTGCCTGGCCNNNNNNNN
chr3	chr3	125	chr3	GTGAGCCACTGTGCCTGGCCAGGAATAAGT	0	72792493	72792523	GTGAGCCACTGTGCCTGGCCNNNNNNNN
chr3	chr3	125	chr3	GTGAGCCATCGTGCCTGGCCAGGAATGGAT	2	195192993	195193023	GTGAGCCACTGTGCCTGGCCNNNNNNNN
chr3	chr3	125	chr3	ATGAGCCACTGCACCTGGCCGGGATTCTTT	3	139014333	139014363	GTGAGCCACTGTGCCTGGCCNNNNNNNN
chr3	chr3	125	chr3	ATGAGCCACCGTGCCTGGCCAGGAATTTTA	2	113789327	113789357	GTGAGCCACTGTGCCTGGCCNNNNNNNN
chr22	chr22	125	chr22	ATGAGCCACCGTGCCTGGCCAGGATATTGG	2	38421443	38421473	GTGAGCCACTGTGCCTGGCCNNNNNNNN
chr2	chr2	125	chr2	GTGAGCCACTGTGCCTGGCCTGGCCTTTTT	0	238275396	238275426	GTGAGCCACTGTGCCTGGCCNNNNNNNN
chr22	chr22	125	chr22	GTGAGCCACTGTGCCCAGCCGGGAGTGCCC	2	23796072	23796102	GTGAGCCACTGTGCCTGGCCNNNNNNNN
chr2	chr2	125	chr2	GTGAGCCACTGTGCCTGGCCAGGCTCTAGT	0	178258376	178258406	GTGAGCCACTGTGCCTGGCCNNNNNNNN
chr21	chr21	125	chr21	GTGAGCCACTGCACCTGGCCAGGATACATC	2	40855478	40855508	GTGAGCCACTGTGCCTGGCCNNNNNNNN
chr2	chr2	125	chr2	GTGAGCCACTGTACCTGGCCTGGTGTACAC	1	124086482	124086512	GTGAGCCACTGTGCCTGGCCNNNNNNNN
chr20	chr20	125	chr20	ATGAGCCACCGTGCCTGGCCTGGATTCTGT	2	50161518	50161548	GTGAGCCACTGTGCCTGGCCNNNNNNNN
chr17	chr17	125	chr17	ATGAGCCACTGTGCCTGGCCAGGGCTGTCT	1	61934162	61934192	GTGAGCCACTGTGCCTGGCCNNNNNNNN
chr16	chr16	125	chr16	GTGAGCCACTGCGCCTGGCCTGGAAATGTT	1	66690814	66690844	GTGAGCCACTGTGCCTGGCCNNNNNNNN
chr1	chr1	125	chr1	ATGAGCCACTGTGCCTGGCCAGGTGAACTA	1	61101103	61101133	GTGAGCCACTGTGCCTGGCCNNNNNNNN
chr14	chr14	125	chr14	ATGAGCCACTGTGCCCGGCCTGGATTCTCT	2	96416091	96416121	GTGAGCCACTGTGCCTGGCCNNNNNNNN
chr1	chr1	125	chr1	GTGAGCCACTGTGCCTAGCCTGGAGATTTC	1	235653500	235653530	GTGAGCCACTGTGCCTGGCCNNNNNNNN
chr1	chr1	125	chr1	ATGAGCCACCATGCCTGGCCTGGGATGGTG	3	212222168	212222198	GTGAGCCACTGTGCCTGGCCNNNNNNNN
chr1	chr1	125	chr1	ATGAGCCACCGTGCCCGGCCTGGTTGATAT	3	15890509	15890539	GTGAGCCACTGTGCCTGGCCNNNNNNNN
chrX	chrX	124	chrX	GTGAGCCACTGTGCCTGGCCAGGTATTTCT	0	77957076	77957106	GTGAGCCACTGTGCCTGGCCNNNNNNNN
chr9	chr9	124	chr9	GTGAGCCACTGTGCCCGGCCTGGGTTCTCT	1	70434101	70434131	GTGAGCCACTGTGCCTGGCCNNNNNNNN
chr7	chr7	124	chr7	ATGAGCCACTGAGCCTGGCCTGGTTCTTCA	2	6278126	6278156	GTGAGCCACTGTGCCTGGCCNNNNNNNN
chr7	chr7	124	chr7	ATGAGCCACCGTGCCTGGCCTGGAACATTA	2	52112331	52112361	GTGAGCCACTGTGCCTGGCCNNNNNNNN
chr7	chr7	124	chr7	ATGAGCCACCATGCCTGGCCCGGCCTTCCT	3	44804917	44804947	GTGAGCCACTGTGCCTGGCCNNNNNNNN
chr6	chr6	124	chr6	GTGAGCCACCATGCCTGGCCTGGTTATTAC	2	151138547	151138577	GTGAGCCACTGTGCCTGGCCNNNNNNNN
chr4	chr4	124	chr4	GTGAGCCACTGTGCCTGGCCTGGGAGATGC	0	17351509	17351539	GTGAGCCACTGTGCCTGGCCNNNNNNNN
chr3	chr3	124	chr3	ATGAGCCACTGCGCCTGGCCAGGCATATAC	2	138183250	138183280	GTGAGCCACTGTGCCTGGCCNNNNNNNN
chr2	chr2	124	chr2	GTGAGCCACCGTGCCTGACCTGGTTTGGAC	2	27065033	27065063	GTGAGCCACTGTGCCTGGCCNNNNNNNN
chr2	chr2	124	chr2	GTGAGCCACCATGCCTGGCCTGGAGCAGAT	2	189994878	189994908	GTGAGCCACTGTGCCTGGCCNNNNNNNN
chr19	chr19	124	chr19	ATGAGCCATTGTGCCTGGCCAGGATATTAT	2	16392761	16392791	GTGAGCCACTGTGCCTGGCCNNNNNNNN
chr18	chr18	124	chr18	GTGAGCCACTGCGCCTGACCAGGAATAGGG	2	23296587	23296617	GTGAGCCACTGTGCCTGGCCNNNNNNNN
chr1	chr1	124	chr1	GTGAGCCACTGTGCCTGGCCAGGGATCTTT	0	75972884	75972914	GTGAGCCACTGTGCCTGGCCNNNNNNNN
chr16	chr16	124	chr16	ATGAACCACTATGCCTGGCCAGGAAGTCAT	3	68809801	68809831	GTGAGCCACTGTGCCTGGCCNNNNNNNN
chr16	chr16	124	chr16	GTGAGCCACTGTGCCTGGCTGGGTGTCTTT	1	10754522	10754552	GTGAGCCACTGTGCCTGGCCNNNNNNNN
chr1	chr1	124	chr1	GTGAGCCACTGTGCCCAGCCTGGTTTGTGT	2	52885483	52885513	GTGAGCCACTGTGCCTGGCCNNNNNNNN
chr13	chr13	124	chr13	GTGAGCCACTGTGCCTGGCCTGGTTTTAGG	0	39065966	39065996	GTGAGCCACTGTGCCTGGCCNNNNNNNN
chr1	chr1	124	chr1	ATGAGCCACCGTGCCTGGCCAGGAAGGCCT	2	27205475	27205505	GTGAGCCACTGTGCCTGGCCNNNNNNNN
chr12	chr12	124	chr12	ATGAGCCACTGTGCCTGGCCTGGGACATTC	1	120590873	120590903	GTGAGCCACTGTGCCTGGCCNNNNNNNN
chr1	chr1	124	chr1	GTGAGCCACTGTGCCTGGCCAGGCCCCTTT	0	179131223	179131253	GTGAGCCACTGTGCCTGGCCNNNNNNNN
chr1	chr1	124	chr1	GTGAGCCACCGTGCCTGGCCTGGATATGTT	1	1428708	1428738	GTGAGCCACTGTGCCTGGCCNNNNNNNN
chr11	chr11	124	chr11	GTGAGCCACTGCGCCTGGCCAGGAAGGTCT	1	1611817	1611847	GTGAGCCACTGTGCCTGGCCNNNNNNNN
chrX	chrX	123	chrX	GTGAGCCACTGCGCCTGGCCTGGTTGGCTC	1	131633457	131633487	GTGAGCCACTGTGCCTGGCCNNNNNNNN
chr7	chr7	123	chr7	GTGAGCCACCGTGCCTGGCCTGGAGGATTA	1	2732259	2732289	GTGAGCCACTGTGCCTGGCCNNNNNNNN
chr7	chr7	123	chr7	GTGAGCCATTGTGCCTGGCCTGGCATCTTT	1	103738960	103738990	GTGAGCCACTGTGCCTGGCCNNNNNNNN
chr5	chr5	123	chr5	ATGAGCCACTGCGCCTGGCCTGGAGCAGCA	2	33477893	33477923	GTGAGCCACTGTGCCTGGCCNNNNNNNN
chr5	chr5	123	chr5	GTGAGCCATTGTACCTGGCCTGGTTTTCAT	2	138016314	138016344	GTGAGCCACTGTGCCTGGCCNNNNNNNN
chr22	chr22	123	chr22	GTGAGCCACCGCGCCTGGCCAGGTTAACAT	2	46732916	46732946	GTGAGCCACTGTGCCTGGCCNNNNNNNN
chr22	chr22	123	chr22	GTGAGCCACTGCGCCTGGCCGGGAGCAGAG	1	41684184	41684214	GTGAGCCACTGTGCCTGGCCNNNNNNNN
chr17	chr17	123	chr17	GTGAGCCACTGCACCTGGCCTGGACAGACA	2	75139528	75139558	GTGAGCCACTGTGCCTGGCCNNNNNNNN
chr17	chr17	123	chr17	GTGAGCCACCGCGCCTGGCCAGGGTGGTGG	2	44581689	44581719	GTGAGCCACTGTGCCTGGCCNNNNNNNN
chr1	chr1	123	chr1	GTGAGCCACCGTGCCTGGCCTGGTGTATAC	1	6978341	6978371	GTGAGCCACTGTGCCTGGCCNNNNNNNN
chr15	chr15	123	chr15	GTGAGCCACCATGCCTGGCCAGGATTTTCT	2	76129931	76129961	GTGAGCCACTGTGCCTGGCCNNNNNNNN
chr14	chr14	123	chr14	GTGAGCCACCATGCCTGGCCAGGACATGCC	2	63430977	63431007	GTGAGCCACTGTGCCTGGCCNNNNNNNN
chr14	chr14	123	chr14	ATGAGCCACTGTGCCTGGCCTGGGTCATCA	1	23680928	23680958	GTGAGCCACTGTGCCTGGCCNNNNNNNN
chr11	chr11	123	chr11	ATGAGCCACTGTGCCTAGCCTGGAACAAAA	2	43500416	43500446	GTGAGCCACTGTGCCTGGCCNNNNNNNN
chr11	chr11	123	chr11	GTGAGCCACTGTGCCTGGCCGGGTTTTTTT	0	108720872	108720902	GTGAGCCACTGTGCCTGGCCNNNNNNNN
chrX	chrX	122	chrX	AAGAGCCACTGTGTCTGGCCAGGGTTACTT	3	119789838	119789868	GTGAGCCACTGTGCCTGGCCNNNNNNNN
chr9	chr9	122	chr9	ATGAGCCACTGTGCCCGGCCTGGTATTTGT	2	97104987	97105017	GTGAGCCACTGTGCCTGGCCNNNNNNNN
chr7	chr7	122	chr7	ATGAGCCACTGCGCCTGGCCAGGAAGTACA	2	151171091	151171121	GTGAGCCACTGTGCCTGGCCNNNNNNNN
chr6	chr6	122	chr6	ATGAGCCACTGTGCCTGGCCAGGGGCCAAA	1	21743841	21743871	GTGAGCCACTGTGCCTGGCCNNNNNNNN
chr5	chr5	122	chr5	GTGAGCCACTGTGCCTGGCCAGGAGGTACT	0	17310118	17310148	GTGAGCCACTGTGCCTGGCCNNNNNNNN
chr5	chr5	122	chr5	GTGAGCCACTGTGCCTAGCCAGGCCCTCCT	1	154601740	154601770	GTGAGCCACTGTGCCTGGCCNNNNNNNN
chr21	chr21	122	chr21	GTGAGCCACTGTGCCTGGCCAGGATTTAAG	0	44051183	44051213	GTGAGCCACTGTGCCTGGCCNNNNNNNN
chr19	chr19	122	chr19	ATGAGCCACCGTGCCTGGCCAGGCATGTTT	2	50067855	50067885	GTGAGCCACTGTGCCTGGCCNNNNNNNN
chr19	chr19	122	chr19	CTGAGCCACTGTGCCTGGCCCGGCTGGCTG	1	10299523	10299553	GTGAGCCACTGTGCCTGGCCNNNNNNNN
chr17	chr17	122	chr17	GTGAGCCACCGTGCCTGGCCCGGGAATATT	1	61979896	61979926	GTGAGCCACTGTGCCTGGCCNNNNNNNN
chr17	chr17	122	chr17	GTGAGCCACCGTGCCTGGCCTGGCTGGCTA	1	60411036	60411066	GTGAGCCACTGTGCCTGGCCNNNNNNNN
chr17	chr17	122	chr17	ATGAGCCACTGTGCCTGGCCCAGAATTCGT	1	40220747	40220777	GTGAGCCACTGTGCCTGGCCNNNNNNNN
chr17	chr17	122	chr17	ATGAGCCACTGTGCCCAGCCTGGTAGCCAT	3	37682311	37682341	GTGAGCCACTGTGCCTGGCCNNNNNNNN
chr17	chr17	122	chr17	GTGAGCCACCGTGCCTGGCCAGGCCTCTAA	1	30791795	30791825	GTGAGCCACTGTGCCTGGCCNNNNNNNN
chr14	chr14	122	chr14	GTGAGCCACCGTGCCTGGCCTGGCTAATTG	1	102955130	102955160	GTGAGCCACTGTGCCTGGCCNNNNNNNN
chr14	chr14	122	chr14	GTGAACCACCGTGCCTGGCCTGGAATTGCT	2	100283760	100283790	GTGAGCCACTGTGCCTGGCCNNNNNNNN
chr1	chr1	122	chr1	ATGAGCCACTGCGCCTGGCCTGGACGCTCA	2	39821134	39821164	GTGAGCCACTGTGCCTGGCCNNNNNNNN
chr12	chr12	122	chr12	ATGAGCCACTGTGCCTGGCTAGGCATATTT	2	63157841	63157871	GTGAGCCACTGTGCCTGGCCNNNNNNNN
chr1	chr1	122	chr1	GTGAGCCACTGTGCCAGGCCAGGAATTATT	1	201979217	201979247	GTGAGCCACTGTGCCTGGCCNNNNNNNN
chr11	chr11	122	chr11	GTGAGTCACTGCACCTGGCCTGGAATTTGT	3	9327409	9327439	GTGAGCCACTGTGCCTGGCCNNNNNNNN
chr11	chr11	122	chr11	GTGAGCCACCGCGCCTGGCCTGGTTTTTAT	2	10003646	10003676	GTGAGCCACTGTGCCTGGCCNNNNNNNN
chr10	chr10	122	chr10	GTGAGCCACTGTGCCTGGACTGGAGGCTAA	1	8892722	8892752	GTGAGCCACTGTGCCTGGCCNNNNNNNN
chr10	chr10	122	chr10	ATGAGCTACTGTGCCTGGCCTGGTTAGCAA	2	60176469	60176499	GTGAGCCACTGTGCCTGGCCNNNNNNNN
chr10	chr10	122	chr10	AAGAGCCACTGTGCCTGGCCAGGAGCTCAT	2	4077725	4077755	GTGAGCCACTGTGCCTGGCCNNNNNNNN
chr10	chr10	122	chr10	TTGAGCCACTGTGCCTGGCCAGGAATAAAT	1	29843424	29843454	GTGAGCCACTGTGCCTGGCCNNNNNNNN
chr10	chr10	122	chr10	ATGAGCCACCGTGCCTGGCCAGGAAGCTTC	2	102972344	102972374	GTGAGCCACTGTGCCTGGCCNNNNNNNN
chrX	chrX	121	chrX	GTGAGCCACTGCGCCTGGCCAGGTTTTCAG	1	55598742	55598772	GTGAGCCACTGTGCCTGGCCNNNNNNNN
chrX	chrX	121	chrX	GTGAACCACCGTGCCTGGCCAGGCCTTGTT	2	51959180	51959210	GTGAGCCACTGTGCCTGGCCNNNNNNNN
chrX	chrX	121	chrX	GTGAGCCACTGTGCCAGGCCCGGGTTTCAG	1	132894420	132894450	GTGAGCCACTGTGCCTGGCCNNNNNNNN
chr9	chr9	121	chr9	GTGAGCCACTGTGCCTGGCCAGGAAACATT	0	94774033	94774063	GTGAGCCACTGTGCCTGGCCNNNNNNNN
chr7	chr7	121	chr7	GTGAGCCACTGTGCCTGGCCTAGGCAACTC	0	105342507	105342537	GTGAGCCACTGTGCCTGGCCNNNNNNNN
chr6	chr6	121	chr6	GTGAGCCACCGTGCCTGGCCTGGTCTGCTT	1	123004620	123004650	GTGAGCCACTGTGCCTGGCCNNNNNNNN
chr5	chr5	121	chr5	GTGAGCCACTGTGCCTGGCCAGGTTCCTCA	0	175651162	175651192	GTGAGCCACTGTGCCTGGCCNNNNNNNN
chr4	chr4	121	chr4	GTGAGCCACCGTGCCTGGCCTGGAAAGCAA	1	176866112	176866142	GTGAGCCACTGTGCCTGGCCNNNNNNNN
chr3	chr3	121	chr3	GTGAGCCACTGTGCCTGGCCAGGTTTGTAA	0	72365530	72365560	GTGAGCCACTGTGCCTGGCCNNNNNNNN
chr3	chr3	121	chr3	ATGAGCCACCGTGCCTGGCCAGGAAAAAGT	2	12590068	12590098	GTGAGCCACTGTGCCTGGCCNNNNNNNN
chr22	chr22	121	chr22	ATGAGCCACTATGCCTGGCCAGGTTTTATA	2	44491053	44491083	GTGAGCCACTGTGCCTGGCCNNNNNNNN
chr21	chr21	121	chr21	CTGAGCCACTGTGCCTGGCCAGGACTTTTC	1	37228739	37228769	GTGAGCCACTGTGCCTGGCCNNNNNNNN
chr19	chr19	121	chr19	GTGAGCCACTGTGCCTGGCCTGGAATGAGA	0	41379188	41379218	GTGAGCCACTGTGCCTGGCCNNNNNNNN
chr19	chr19	121	chr19	CTGAGCCACTGTGCCTGGCCTGGACACAGT	1	29803297	29803327	GTGAGCCACTGTGCCTGGCCNNNNNNNN
chr18	chr18	121	chr18	GTGAGCCACTGCACCTGGCCTGGACTTTCA	2	74524866	74524896	GTGAGCCACTGTGCCTGGCCNNNNNNNN
chr18	chr18	121	chr18	GTGAGCCACTGTGCCTGGCCTGGACATTTT	0	26743385	26743415	GTGAGCCACTGTGCCTGGCCNNNNNNNN
chr1	chr1	121	chr1	GTAAGCCACTGTGCCTGGCCTGGACATGCA	1	80268982	80269012	GTGAGCCACTGTGCCTGGCCNNNNNNNN
chr17	chr17	121	chr17	GTGAGCCACCGTGCCTGGCCTGGAATTTAT	1	45318001	45318031	GTGAGCCACTGTGCCTGGCCNNNNNNNN
chr14	chr14	121	chr14	ATGAGCCACTGTGCCCAGCCTGGGACCTAC	3	76977120	76977150	GTGAGCCACTGTGCCTGGCCNNNNNNNN
chr14	chr14	121	chr14	ATGAGCCACCGTGCCTGGCCAGGTCTGATT	2	62417441	62417471	GTGAGCCACTGTGCCTGGCCNNNNNNNN
chr13	chr13	121	chr13	GTGAGCCACTGTGCCTGGCCAAGGACCCAT	0	69458863	69458893	GTGAGCCACTGTGCCTGGCCNNNNNNNN
chr12	chr12	121	chr12	ATGAGCCACTGTGCCTGGCCTGGAGTAAAG	1	88704813	88704843	GTGAGCCACTGTGCCTGGCCNNNNNNNN
chr12	chr12	121	chr12	GTGAGCCACTGCGCCTGGCCTGGGTTATCA	1	55786938	55786968	GTGAGCCACTGTGCCTGGCCNNNNNNNN
chr1	chr1	121	chr1	GTGAGCCACTGTGCCCAGCCTGGTTTTTTT	2	226183899	226183929	GTGAGCCACTGTGCCTGGCCNNNNNNNN
chr1	chr1	121	chr1	GTTAGCCACTGTGCCTGGCCTGGATCTTTT	1	160145221	160145251	GTGAGCCACTGTGCCTGGCCNNNNNNNN
chr1	chr1	121	chr1	GTGAGCCACTGTACCTGGCCTGGCCTAAAG	1	154995193	154995223	GTGAGCCACTGTGCCTGGCCNNNNNNNN
chr10	chr10	121	chr10	ATGAGCCACTGCCCCTGGCCCGGTATACCT	3	24202897	24202927	GTGAGCCACTGTGCCTGGCCNNNNNNNN
chr10	chr10	121	chr10	GTGAGCCACCATGCCTGGCCAGGTTTAGAG	2	130098030	130098060	GTGAGCCACTGTGCCTGGCCNNNNNNNN
chrX	chrX	120	chrX	GTGAGCCACTGTGCCCAGCCTGGTTTATTT	2	106807760	106807790	GTGAGCCACTGTGCCTGGCCNNNNNNNN
chr9	chr9	120	chr9	GTGAGCCACCATGCCTGGCCTGGATTTCAC	2	130079242	130079272	GTGAGCCACTGTGCCTGGCCNNNNNNNN
chr7	chr7	120	chr7	ATGAGCCACCGTGCCTGGCCAGGAGCATTT	2	15928572	15928602	GTGAGCCACTGTGCCTGGCCNNNNNNNN
chr7	chr7	120	chr7	ATGAGCCACCGTGCCTGGCCAGGGGATTAT	2	122422662	122422692	GTGAGCCACTGTGCCTGGCCNNNNNNNN
chr6	chr6	120	chr6	ATGAGCCACTGTGCCCAGCCGGGTCTGTAT	3	118970284	118970314	GTGAGCCACTGTGCCTGGCCNNNNNNNN
chr5	chr5	120	chr5	GTGAGCCACTGCGCCTGGCCTGGAATCATT	1	90617587	90617617	GTGAGCCACTGTGCCTGGCCNNNNNNNN
chr5	chr5	120	chr5	GTGAGCCACTGTGCCTGGCCAGGAATTCTT	0	167263792	167263822	GTGAGCCACTGTGCCTGGCCNNNNNNNN
chr4	chr4	120	chr4	GTGAGCCACTGCGCCTGGCCAGGGCCAGTA	1	151343829	151343859	GTGAGCCACTGTGCCTGGCCNNNNNNNN
chr3	chr3	120	chr3	GTGAGCCACTGTGCCTGGCCGGGCTGTTTA	0	50840046	50840076	GTGAGCCACTGTGCCTGGCCNNNNNNNN
chr2	chr2	120	chr2	GTGAGCCACCATGCCTGGCCAGGGGTAAAA	2	71297518	71297548	GTGAGCCACTGTGCCTGGCCNNNNNNNN
chr2	chr2	120	chr2	ATGAGCCACTGTGCCTGGCCAGGTTGAGCT	1	187699345	187699375	GTGAGCCACTGTGCCTGGCCNNNNNNNN
chr2	chr2	120	chr2	GTGAGCCACTGTGCCTGGCCTGGCTAACTT	0	119995554	119995584	GTGAGCCACTGTGCCTGGCCNNNNNNNN
chr17	chr17	120	chr17	GTGAGCCACTGCGCCTAGCCCGGATATAGC	2	963310	963340	GTGAGCCACTGTGCCTGGCCNNNNNNNN
chr16	chr16	120	chr16	GTGAGCCACTGTACCTGGCCAGGCTACCTT	1	56645459	56645489	GTGAGCCACTGTGCCTGGCCNNNNNNNN
chr16	chr16	120	chr16	GTGAGCCACTGTGCCCAGCCTGGAAAGTCC	2	14970437	14970467	GTGAGCCACTGTGCCTGGCCNNNNNNNN
chr15	chr15	120	chr15	GTGAGCCACTGCGCCTGGCCTGGTTCCTTT	1	98967010	98967040	GTGAGCCACTGTGCCTGGCCNNNNNNNN
chr15	chr15	120	chr15	GTGAGCCACAGTGCCTGGCCTGGTTTTTCA	1	80171741	80171771	GTGAGCCACTGTGCCTGGCCNNNNNNNN
chr15	chr15	120	chr15	ATGAGCCACCGTGCCTGGCCTGGCACAGGT	2	75547003	75547033	GTGAGCCACTGTGCCTGGCCNNNNNNNN
chr13	chr13	120	chr13	GTGAGCCACCGTGCCTGGCCCGGCTGTGGC	1	98051688	98051718	GTGAGCCACTGTGCCTGGCCNNNNNNNN
chr1	chr1	120	chr1	GTGAGCCACCGTGCCCGGCCTGGGCAAAGT	2	24640695	24640725	GTGAGCCACTGTGCCTGGCCNNNNNNNN
chr1	chr1	120	chr1	GTGAGCCACTGTGCCTGGCCTGGTTCTTAC	0	115712632	115712662	GTGAGCCACTGTGCCTGGCCNNNNNNNN
chr1	chr1	120	chr1	ATGAGCCACCATGCCTGGCCTGGAGATGTT	3	109525172	109525202	GTGAGCCACTGTGCCTGGCCNNNNNNNN
chr10	chr10	120	chr10	ATGAGCCACTGTGCCTGGCCTGGGAATGCA	1	7624215	7624245	GTGAGCCACTGTGCCTGGCCNNNNNNNN
chr10	chr10	120	chr10	GTGAGCCACCGTGCCTGGCCAGGGGGCTTA	1	24800588	24800618	GTGAGCCACTGTGCCTGGCCNNNNNNNN
chrX	chrX	119	chrX	GTGAGCCACCATGCCTGGCCAGGCTAGTTT	2	130360170	130360200	GTGAGCCACTGTGCCTGGCCNNNNNNNN
chrX	chrX	119	chrX	ATGAGCCACTGTGCCTGGCCAGGCTGGCTT	1	118463772	118463802	GTGAGCCACTGTGCCTGGCCNNNNNNNN
chrX	chrX	119	chrX	GTGAGCCACCATGCCTGGCCTGGACCATAT	2	11731170	11731200	GTGAGCCACTGTGCCTGGCCNNNNNNNN
chr8	chr8	119	chr8	ATGAGCCACTGTGCCTGGCCAGGGGACATG	1	97902142	97902172	GTGAGCCACTGTGCCTGGCCNNNNNNNN
chr7	chr7	119	chr7	GTGAGCCACTGTGCCAGGCCAGGAATGTGA	1	69547372	69547402	GTGAGCCACTGTGCCTGGCCNNNNNNNN
chr7	chr7	119	chr7	ATGAGCCACTGTGCCTGGCCTGGTTCTGAT	1	42167106	42167136	GTGAGCCACTGTGCCTGGCCNNNNNNNN
chr6	chr6	119	chr6	GTGAGCCACCGTGCCTGGCCAGGGTTCTTT	1	148446387	148446417	GTGAGCCACTGTGCCTGGCCNNNNNNNN
chr5	chr5	119	chr5	ATGAGCCACCGCGCCTGGCCAGGAATCTTT	3	10760034	10760064	GTGAGCCACTGTGCCTGGCCNNNNNNNN
chr4	chr4	119	chr4	GTGAGCCACTGTGCCTGGCCAGATGAGAGA	0	56299377	56299407	GTGAGCCACTGTGCCTGGCCNNNNNNNN
chr3	chr3	119	chr3	GTGAGCCACTGCGCCTGACCAGGGACTGAA	2	77582848	77582878	GTGAGCCACTGTGCCTGGCCNNNNNNNN
chr2	chr2	119	chr2	ATGAGCCACTGCACCTGGCCTGGAAGCCTA	3	42208712	42208742	GTGAGCCACTGTGCCTGGCCNNNNNNNN
chr22	chr22	119	chr22	TTGAGCCACCGTGCCTGGCCGGGCCTTAAT	2	31405445	31405475	GTGAGCCACTGTGCCTGGCCNNNNNNNN
chr21	chr21	119	chr21	GTGAGCCACTGTGCCTGGCCAGGAATGGCT	0	39395643	39395673	GTGAGCCACTGTGCCTGGCCNNNNNNNN
chr19	chr19	119	chr19	GTGAGCCACCGTGCCTGGCCTGGTGTGTTT	1	17498513	17498543	GTGAGCCACTGTGCCTGGCCNNNNNNNN
chr18	chr18	119	chr18	GTGAGCCACTGCGCCTGGCCAGGCATTTCT	1	31228570	31228600	GTGAGCCACTGTGCCTGGCCNNNNNNNN
chr17	chr17	119	chr17	GTGAGCCACTGCGCCTGGCCTGGGTTCGTA	1	40786666	40786696	GTGAGCCACTGTGCCTGGCCNNNNNNNN
chr17	chr17	119	chr17	ATGAGCCACTGTGCCTGGTCAGGCTTGCAG	2	31962143	31962173	GTGAGCCACTGTGCCTGGCCNNNNNNNN
chr16	chr16	119	chr16	GTGAGCCACTGTGCCTGGCCTGGAAGACCA	0	30496967	30496997	GTGAGCCACTGTGCCTGGCCNNNNNNNN
chr16	chr16	119	chr16	ATGAGCCACTGCGCCTGGCCAGGATTTAGT	2	15003495	15003525	GTGAGCCACTGTGCCTGGCCNNNNNNNN
chr15	chr15	119	chr15	ATGAGCCACTGCGCCTGGCCTGGCCTAATT	2	90156182	90156212	GTGAGCCACTGTGCCTGGCCNNNNNNNN
chr15	chr15	119	chr15	GTGAGCCACTGCGCCTGGCCTGGGACTTGC	1	90140380	90140410	GTGAGCCACTGTGCCTGGCCNNNNNNNN
chr14	chr14	119	chr14	ATGAGCCACTGTGCCTGGCCAGGAAGTCCT	1	90364766	90364796	GTGAGCCACTGTGCCTGGCCNNNNNNNN
chr14	chr14	119	chr14	ATGAGCCACAGTGCCTGGCCAGGAATTTTT	2	26813922	26813952	GTGAGCCACTGTGCCTGGCCNNNNNNNN
chr13	chr13	119	chr13	ATGAGCCACTGCGCCTGGCCTGGAGTTATT	2	89977754	89977784	GTGAGCCACTGTGCCTGGCCNNNNNNNN
chr13	chr13	119	chr13	ATGAGCCACTGTGCCTGGCCAGGAAGGCCT	1	45325062	45325092	GTGAGCCACTGTGCCTGGCCNNNNNNNN
chr13	chr13	119	chr13	GTGAGCCACTGTGCCTGGCCAGGGGTTGTG	0	32356349	32356379	GTGAGCCACTGTGCCTGGCCNNNNNNNN
chr1	chr1	119	chr1	GTGAGCCATTGCGCCTGGCCTGGCCTTCTT	2	28960740	28960770	GTGAGCCACTGTGCCTGGCCNNNNNNNN
chr12	chr12	119	chr12	ATGAGCCACTGCGCCTGGCCTGGTATATAC	2	84754635	84754665	GTGAGCCACTGTGCCTGGCCNNNNNNNN
chr1	chr1	119	chr1	GTGAGCCACCATGCCTGGCCTGGGAGGAGA	2	231432826	231432856	GTGAGCCACTGTGCCTGGCCNNNNNNNN
chr11	chr11	119	chr11	GTGAGCCACCGTGCCTGGCCTGGTTGTTTT	1	62746499	62746529	GTGAGCCACTGTGCCTGGCCNNNNNNNN
chr11	chr11	119	chr11	ATGAGCCACTGTGCCTGGCCAGGAACAGCC	1	2330105	2330135	GTGAGCCACTGTGCCTGGCCNNNNNNNN
chr1	chr1	119	chr1	GTGAGCCACTGCACCTGGCCGGGTGACAGT	2	114415658	114415688	GTGAGCCACTGTGCCTGGCCNNNNNNNN
chr10	chr10	119	chr10	GTGAGCCACTGTGCCTGGCCAGGGGCATAG	0	108673172	108673202	GTGAGCCACTGTGCCTGGCCNNNNNNNN
chr7	chr7	118	chr7	ATGAGCCACTGCGCCTGGCCTGGCTGAGAA	2	16765383	16765413	GTGAGCCACTGTGCCTGGCCNNNNNNNN
chr7	chr7	118	chr7	GTGAGCCACCATGCCTGGCCGGGACCCTGA	2	100631336	100631366	GTGAGCCACTGTGCCTGGCCNNNNNNNN
chr5	chr5	118	chr5	GTGAGCCACTGCGCCTGGCCAGGAGTTGTA	1	74714114	74714144	GTGAGCCACTGTGCCTGGCCNNNNNNNN
chr5	chr5	118	chr5	GTGAGCCACTGTGCCTGGCCTGGGTTTTTT	0	142237566	142237596	GTGAGCCACTGTGCCTGGCCNNNNNNNN
chr4	chr4	118	chr4	ATGAGCCACTGTTCCTGGCCAGGTTTTGTT	2	75442033	75442063	GTGAGCCACTGTGCCTGGCCNNNNNNNN
chr3	chr3	118	chr3	GTGAGCCACTGCACCTGGCCTGGAATGTGC	2	151170553	151170583	GTGAGCCACTGTGCCTGGCCNNNNNNNN
chr3	chr3	118	chr3	ATGAGCCACTGTGCCTGGCCAGGGCAAAGT	1	130754672	130754702	GTGAGCCACTGTGCCTGGCCNNNNNNNN
chr21	chr21	118	chr21	GTGAGCCACCGTGCCTGGCCAGGAAAAGAT	1	36668074	36668104	GTGAGCCACTGTGCCTGGCCNNNNNNNN
chr21	chr21	118	chr21	GTGAGCCACCGTGCCTGGCCAGGATTTTGA	1	31544721	31544751	GTGAGCCACTGTGCCTGGCCNNNNNNNN
chr19	chr19	118	chr19	GTGAGCCACTGTGTCTGGCCTGGAGTAGCC	1	17593347	17593377	GTGAGCCACTGTGCCTGGCCNNNNNNNN
chr17	chr17	118	chr17	GTGAGCCACTGTGCCTGGCCAAGGCTCTTT	0	50163139	50163169	GTGAGCCACTGTGCCTGGCCNNNNNNNN
chr17	chr17	118	chr17	GTGAGTCACTGTGTCTGGCCTGGCAGTTCC	2	21535856	21535886	GTGAGCCACTGTGCCTGGCCNNNNNNNN
chr15	chr15	118	chr15	ATGAGCCACTGTGCCTGGCCAGGAAGCAGA	1	65747750	65747780	GTGAGCCACTGTGCCTGGCCNNNNNNNN
chr1	chr1	118	chr1	ATGAGCCACTGCGCCTGGCCAGGTTTCTGT	2	54146801	54146831	GTGAGCCACTGTGCCTGGCCNNNNNNNN
chr14	chr14	118	chr14	GTGAGCCACTGTGCCTGGCCTGGGCAGTCG	0	103114945	103114975	GTGAGCCACTGTGCCTGGCCNNNNNNNN
chr14	chr14	118	chr14	TTGAGCCACTGTGCCTGACCTGGATCATTA	2	100210883	100210913	GTGAGCCACTGTGCCTGGCCNNNNNNNN
chr8	chr8	117	chr8	GTGAGCCACCGTGCCTGGCCTGGATCATTA	1	54054262	54054292	GTGAGCCACTGTGCCTGGCCNNNNNNNN
chr7	chr7	117	chr7	GTGAGCCACTGTGCCTGGCCGGGATTCACC	0	100192232	100192262	GTGAGCCACTGTGCCTGGCCNNNNNNNN
chr4	chr4	117	chr4	GTGAGCCACCGTGCCTGGCCGGGATAACTA	1	42093441	42093471	GTGAGCCACTGTGCCTGGCCNNNNNNNN
chr4	chr4	117	chr4	ATGAGCCACTGCACCTGGCCTGGCTGGAGT	3	126763855	126763885	GTGAGCCACTGTGCCTGGCCNNNNNNNN
chr4	chr4	117	chr4	ATGAGCCACCGTGCCTGGCCTGGAAATTGA	2	106174830	106174860	GTGAGCCACTGTGCCTGGCCNNNNNNNN
chr2	chr2	117	chr2	ATGAGCCACTGTGCCTGGCCGGGATCTACT	1	43847415	43847445	GTGAGCCACTGTGCCTGGCCNNNNNNNN
chr2	chr2	117	chr2	ATGAGCCACCATGCCTGGCCTGGAATCTTC	3	25642691	25642721	GTGAGCCACTGTGCCTGGCCNNNNNNNN
chr19	chr19	117	chr19	GTGAGCCACTGCGCCTGGCCTGGATTTTAA	1	34197370	34197400	GTGAGCCACTGTGCCTGGCCNNNNNNNN
chr19	chr19	117	chr19	ATGAGCCACTGTGCCTGGCCTGGGTGACTG	1	10914835	10914865	GTGAGCCACTGTGCCTGGCCNNNNNNNN
chr17	chr17	117	chr17	GTGAGCCACTGTGCCTGGCCTGGTGCTTTT	0	39837214	39837244	GTGAGCCACTGTGCCTGGCCNNNNNNNN
chr17	chr17	117	chr17	ATGAGCCACTGTGCCCGGCCAGGACTTTGT	2	16333211	16333241	GTGAGCCACTGTGCCTGGCCNNNNNNNN
chr13	chr13	117	chr13	GTGAGCCACCGCGCCTGGCCAGGTTCCACT	2	93450065	93450095	GTGAGCCACTGTGCCTGGCCNNNNNNNN
chr1	chr1	117	chr1	ATGAGCCACCGCGCCTGGCCTGGAATTGGA	3	32110344	32110374	GTGAGCCACTGTGCCTGGCCNNNNNNNN
chr12	chr12	117	chr12	GTGAGCCACTGCACCTGACCAGGCTGCAAT	3	82222326	82222356	GTGAGCCACTGTGCCTGGCCNNNNNNNN
chr12	chr12	117	chr12	ATGAGCCACTGTGCCTGGCCTGGTGTTCTT	1	68898133	68898163	GTGAGCCACTGTGCCTGGCCNNNNNNNN
chr12	chr12	117	chr12	GTGAACCACTGCGCCTGGCCTGGGTATTGA	2	65202297	65202327	GTGAGCCACTGTGCCTGGCCNNNNNNNN
chr12	chr12	117	chr12	GTGAGCCACCGCGCCTGGCCTGGTACCAAT	2	51608289	51608319	GTGAGCCACTGTGCCTGGCCNNNNNNNN
chr1	chr1	117	chr1	GTGAACCACCATGCCTGGCCGGGTCTTCCA	3	23758552	23758582	GTGAGCCACTGTGCCTGGCCNNNNNNNN
chr1	chr1	117	chr1	GTGAGCCACTGTGCCCGGCCCGGGCAGCTG	1	230004606	230004636	GTGAGCCACTGTGCCTGGCCNNNNNNNN
chr12	chr12	117	chr12	GTGAGCCACTGTGCCCGGCCTGGAATGTGT	1	100549046	100549076	GTGAGCCACTGTGCCTGGCCNNNNNNNN
chr1	chr1	117	chr1	GTGAGCCACTGTGCCTGGCCTGGACTGTTG	0	11960249	11960279	GTGAGCCACTGTGCCTGGCCNNNNNNNN
chr10	chr10	117	chr10	GTGAGCCACTGTGCCTGGCCAGGAATTAAT	0	73585730	73585760	GTGAGCCACTGTGCCTGGCCNNNNNNNN
chr10	chr10	117	chr10	ATGAGCCACTGTGCCTGGCCTGGGTATTTT	1	56924111	56924141	GTGAGCCACTGTGCCTGGCCNNNNNNNN
chrX	chrX	116	chrX	GTGAGCCACTGCACCTGGCCAGGAGATCTA	2	71013416	71013446	GTGAGCCACTGTGCCTGGCCNNNNNNNN
chrX	chrX	116	chrX	GTGAGCCACCGCGCCTGGCCAGGATTGATG	2	129928463	129928493	GTGAGCCACTGTGCCTGGCCNNNNNNNN
chr9	chr9	116	chr9	GTGAGCCACTGTGCCTGGCCTGGAAAACAC	0	86463417	86463447	GTGAGCCACTGTGCCTGGCCNNNNNNNN
chr8	chr8	116	chr8	ATGAGCCACCATGCCTGGCCAGGCCAGGAT	3	143105428	143105458	GTGAGCCACTGTGCCTGGCCNNNNNNNN
chr7	chr7	116	chr7	GTGAGCCACTGTGCCTGGCCTGGAATTCAC	0	98641268	98641298	GTGAGCCACTGTGCCTGGCCNNNNNNNN
chr7	chr7	116	chr7	ATGAGCCATTGTGCCTGGCCGGGTCTGTAC	2	139436182	139436212	GTGAGCCACTGTGCCTGGCCNNNNNNNN
chr6	chr6	116	chr6	GTGAGCCACCATGCCTGGCCTGGCCTGAGC	2	154844632	154844662	GTGAGCCACTGTGCCTGGCCNNNNNNNN
chr5	chr5	116	chr5	ATGAGCCACCATGCCTGGCCAGGAATGAAT	3	97147483	97147513	GTGAGCCACTGTGCCTGGCCNNNNNNNN
chr5	chr5	116	chr5	GTGAGCCACTGTGCCTGGCCAGGAGGTCAC	0	23510853	23510883	GTGAGCCACTGTGCCTGGCCNNNNNNNN
chr4	chr4	116	chr4	GTGAGCCACCGTGCCTGGCCCGGGGTGTTG	1	3010506	3010536	GTGAGCCACTGTGCCTGGCCNNNNNNNN
chr3	chr3	116	chr3	GTGAGCCACCATGCCTGGCCTGGGTTTTTA	2	41157918	41157948	GTGAGCCACTGTGCCTGGCCNNNNNNNN
chr2	chr2	116	chr2	ATGAGCCAATGTGCCTGGCCTGGAGCATGT	2	28043408	28043438	GTGAGCCACTGTGCCTGGCCNNNNNNNN
chr22	chr22	116	chr22	GTGAGCCACCGCGCCTGGCCAGGACTGGTT	2	35725532	35725562	GTGAGCCACTGTGCCTGGCCNNNNNNNN
chr2	chr2	116	chr2	GTGAGCCACCGCGCCTGGCCTGGCATTCTG	2	177043686	177043716	GTGAGCCACTGTGCCTGGCCNNNNNNNN
chr14	chr14	116	chr14	ATGAGCCACAGTGCCTGGCCAGGGGGGAGG	2	63558776	63558806	GTGAGCCACTGTGCCTGGCCNNNNNNNN
chr12	chr12	116	chr12	GTGAGCCACCATGCCTGGCCGGGTTTTAAA	2	73220005	73220035	GTGAGCCACTGTGCCTGGCCNNNNNNNN
chr1	chr1	116	chr1	GTGAGCCACCGTGCCTGGCCAGGGATTGTT	1	24821865	24821895	GTGAGCCACTGTGCCTGGCCNNNNNNNN
chr12	chr12	116	chr12	ATGAGCCACTGTGCCTAGCCTGGTTTTGAC	2	120122624	120122654	GTGAGCCACTGTGCCTGGCCNNNNNNNN
chr10	chr10	116	chr10	GTGAGCCACTGCACCTGGCCGGGAACAACA	2	70505728	70505758	GTGAGCCACTGTGCCTGGCCNNNNNNNN
chr10	chr10	116	chr10	GTGAGCCACTGTGCCTGGCCAGGAGTCCAC	0	102158802	102158832	GTGAGCCACTGTGCCTGGCCNNNNNNNN
chrX	chrX	115	chrX	GTGAGCCACTGTGCCTGGCCTGGGGGTCAC	0	40911028	40911058	GTGAGCCACTGTGCCTGGCCNNNNNNNN
chrX	chrX	115	chrX	GTGAGCCACTGCGCCTGGCCAGGAGCCTTT	1	141131777	141131807	GTGAGCCACTGTGCCTGGCCNNNNNNNN
chrX	chrX	115	chrX	GTGAGCCACTGTGCCCGGCCGGGTGACCTC	1	107839649	107839679	GTGAGCCACTGTGCCTGGCCNNNNNNNN
chr8	chr8	115	chr8	ATGAGCCACTGTGCCCAGCCAGGAATGGAG	3	69075013	69075043	GTGAGCCACTGTGCCTGGCCNNNNNNNN
chr7	chr7	115	chr7	GTGAGCCACCATGCCTGGCCTGGCAATAAA	2	134438367	134438397	GTGAGCCACTGTGCCTGGCCNNNNNNNN
chr6	chr6	115	chr6	GTGAGCCACTGTGCCTGACCAGGGCCTTAG	1	165104063	165104093	GTGAGCCACTGTGCCTGGCCNNNNNNNN
chr4	chr4	115	chr4	GTGAGCCACTGCGCCTGGCCAGGAGCAGAG	1	89964119	89964149	GTGAGCCACTGTGCCTGGCCNNNNNNNN
chr4	chr4	115	chr4	GTGAGCCACTGCACCTGGCCAGGCAGGTTG	2	121339644	121339674	GTGAGCCACTGTGCCTGGCCNNNNNNNN
chr3	chr3	115	chr3	GTGAGCCACTGTGCCTGGCCTGGATTTTTT	0	98702604	98702634	GTGAGCCACTGTGCCTGGCCNNNNNNNN
chr3	chr3	115	chr3	GTGAGCCACTGTGCCTGGCCCGGATAAGCA	0	138784099	138784129	GTGAGCCACTGTGCCTGGCCNNNNNNNN
chr22	chr22	115	chr22	GTGAGCCACTGCGCCTGGCCAGGAAATGTA	1	42224179	42224209	GTGAGCCACTGTGCCTGGCCNNNNNNNN
chr22	chr22	115	chr22	ATGAGCCACTGTGCCCGGCCTGGAATGTTT	2	37764990	37765020	GTGAGCCACTGTGCCTGGCCNNNNNNNN
chr2	chr2	115	chr2	ATGAGCCACTGCGCCTGGCCTGGATCAATG	2	2140848	2140878	GTGAGCCACTGTGCCTGGCCNNNNNNNN
chr1	chr1	115	chr1	ATGAGCCACCATGCCTGACCAGGCTCAGGT	4	65598213	65598243	GTGAGCCACTGTGCCTGGCCNNNNNNNN
chr16	chr16	115	chr16	ATGAGCCACTGCGCCTGGCCTGGTGAGCGT	2	50976752	50976782	GTGAGCCACTGTGCCTGGCCNNNNNNNN
chr16	chr16	115	chr16	ATGAGCCACTCTGCCTGGCCTGGAGTATTA	2	11541738	11541768	GTGAGCCACTGTGCCTGGCCNNNNNNNN
chr15	chr15	115	chr15	GTGAGCCACTGTGCCTGGCCTGGCCAGCAC	0	66579813	66579843	GTGAGCCACTGTGCCTGGCCNNNNNNNN
chr14	chr14	115	chr14	GTGAGCCACTGTGCCTGGCCAGGAATGATG	0	39105246	39105276	GTGAGCCACTGTGCCTGGCCNNNNNNNN
chr13	chr13	115	chr13	GTGAGCCACTGTGTCTGGCCGAGAAACAAT	1	63420483	63420513	GTGAGCCACTGTGCCTGGCCNNNNNNNN
chr13	chr13	115	chr13	ATGAGCCACTGTGCCTGGCCAAGCAGGCAG	1	31234299	31234329	GTGAGCCACTGTGCCTGGCCNNNNNNNN
chr13	chr13	115	chr13	ATGAGCCACTGCACCTGGCCAGGGCTATTT	3	26939713	26939743	GTGAGCCACTGTGCCTGGCCNNNNNNNN
chr1	chr1	115	chr1	ATGAGCCACCATGCCTGGCCAGGCACTGTG	3	27971301	27971331	GTGAGCCACTGTGCCTGGCCNNNNNNNN
chr1	chr1	115	chr1	ATGAGCCACCATGCCTGGCCTGGTCTCTAG	3	26567658	26567688	GTGAGCCACTGTGCCTGGCCNNNNNNNN
chr11	chr11	115	chr11	GTGAGCCACTGCGCCTGGCCAGGCTGTATT	1	45834891	45834921	GTGAGCCACTGTGCCTGGCCNNNNNNNN
chr11	chr11	115	chr11	ATGAGCCACTGTGCCTAGCCTGGACATAGT	2	118583461	118583491	GTGAGCCACTGTGCCTGGCCNNNNNNNN
chr1	chr1	115	chr1	ATGAGCCAGTGTGCCTGGCCAGGGATCCAG	2	111647814	111647844	GTGAGCCACTGTGCCTGGCCNNNNNNNN
chrX	chrX	114	chrX	GTGAGCCACTGCGCCTGGCCAGGAAAACAC	1	77856047	77856077	GTGAGCCACTGTGCCTGGCCNNNNNNNN
chr9	chr9	114	chr9	ATGAGCTACTGTGCCTGGCCAGGGGAGGTT	2	111261434	111261464	GTGAGCCACTGTGCCTGGCCNNNNNNNN
chr8	chr8	114	chr8	GCGAGCCACTGTGCCTGGCCTGGACACATT	1	63920161	63920191	GTGAGCCACTGTGCCTGGCCNNNNNNNN
chr8	chr8	114	chr8	ATGAACCACTGTGCCTGGCCAGGAGGAGCA	2	112545191	112545221	GTGAGCCACTGTGCCTGGCCNNNNNNNN
chr7	chr7	114	chr7	GTGAGCCACCATGCCTGGCCGGGTATGTTT	2	77334792	77334822	GTGAGCCACTGTGCCTGGCCNNNNNNNN
chr7	chr7	114	chr7	GTGAGCTACTGTGCCTGGCCAGGGCTTGGA	1	1222576	1222606	GTGAGCCACTGTGCCTGGCCNNNNNNNN
chr6	chr6	114	chr6	GTGAGCCACCATGCCTGGCCAGGATTTTAC	2	83493292	83493322	GTGAGCCACTGTGCCTGGCCNNNNNNNN
chr6	chr6	114	chr6	GTGAGCCACTGCGCCTGGCCAGGAGTCTTT	1	113415387	113415417	GTGAGCCACTGTGCCTGGCCNNNNNNNN
chr5	chr5	114	chr5	GTGAGCCACTGTACCTAGCCAGGACACACA	2	172360539	172360569	GTGAGCCACTGTGCCTGGCCNNNNNNNN
chr5	chr5	114	chr5	GTGAGCCACTGCACCTGGCCAGGCGACTGC	2	149537083	149537113	GTGAGCCACTGTGCCTGGCCNNNNNNNN
chr2	chr2	114	chr2	GTGAGCCACTATGCCTGGCCTGGTCATTCC	1	227643500	227643530	GTGAGCCACTGTGCCTGGCCNNNNNNNN
chr21	chr21	114	chr21	ATGAGCCACTGTGCCCAGCCGGGTTATTAT	3	17907620	17907650	GTGAGCCACTGTGCCTGGCCNNNNNNNN
chr20	chr20	114	chr20	GTGAGCCACTGTGCCTGGCCTGGAATGGGT	0	19973496	19973526	GTGAGCCACTGTGCCTGGCCNNNNNNNN
chr20	chr20	114	chr20	GTGAGCCACTGTGCCCGGCCAGGAGGACAC	1	18290836	18290866	GTGAGCCACTGTGCCTGGCCNNNNNNNN
chr19	chr19	114	chr19	ATGAGCCACCGTGTCTGGCCGGGAACAGAA	3	522631	522661	GTGAGCCACTGTGCCTGGCCNNNNNNNN
chr19	chr19	114	chr19	GTGAGCCACTGTGCCTGGCCTGGCCTATGT	0	47537271	47537301	GTGAGCCACTGTGCCTGGCCNNNNNNNN
chr19	chr19	114	chr19	GTGAGCCACTGTGCCTGGTCAGGTTCCCTC	1	35343871	35343901	GTGAGCCACTGTGCCTGGCCNNNNNNNN
chr19	chr19	114	chr19	GTGAGCCACTGCGCCTGGCCAGGAGTGGAT	1	28833002	28833032	GTGAGCCACTGTGCCTGGCCNNNNNNNN
chr17	chr17	114	chr17	GTGAGCCACTGCACCTGGCCTGGGTTTGGG	2	75378093	75378123	GTGAGCCACTGTGCCTGGCCNNNNNNNN
chr16	chr16	114	chr16	GTGAGCCACTGTGCCTAGCCAGGTTCCATA	1	83876324	83876354	GTGAGCCACTGTGCCTGGCCNNNNNNNN
chr15	chr15	114	chr15	GTGAGCCACTGTGCCTGGCCTGGTTTGACT	0	51842055	51842085	GTGAGCCACTGTGCCTGGCCNNNNNNNN
chr14	chr14	114	chr14	GTGAGCCACCATGCCTGGCCAGGTTAAACT	2	105004745	105004775	GTGAGCCACTGTGCCTGGCCNNNNNNNN
chr14	chr14	114	chr14	ATGAGCCACCGTGCCTGGCCAGGACAGTCT	2	103947606	103947636	GTGAGCCACTGTGCCTGGCCNNNNNNNN
chr13	chr13	114	chr13	ATGAGCCACCGTGCCTGGCCTGGCTGCTTA	2	19544603	19544633	GTGAGCCACTGTGCCTGGCCNNNNNNNN
chr12	chr12	114	chr12	GTGAGCCACTGTGCCCGGCCAGGATGGGGT	1	92193565	92193595	GTGAGCCACTGTGCCTGGCCNNNNNNNN
chr12	chr12	114	chr12	GTGAGCCACCGCGCCTGGCCAGGAATCTGC	2	56046213	56046243	GTGAGCCACTGTGCCTGGCCNNNNNNNN
chr1	chr1	114	chr1	ATGAGCCACTGTGCCTGGCCCAGAGCCTGT	1	235300123	235300153	GTGAGCCACTGTGCCTGGCCNNNNNNNN
chr1	chr1	114	chr1	GTGAGCCACTGCACCTGGCCAGGCTTGTGA	2	199951415	199951445	GTGAGCCACTGTGCCTGGCCNNNNNNNN
chr11	chr11	114	chr11	GTGAGCCACCGTGCCTGGCCTGGTTTTGTT	1	65878773	65878803	GTGAGCCACTGTGCCTGGCCNNNNNNNN
chr11	chr11	114	chr11	GTGAGCCACTGCGCCCGGCCTGGGAGGGGG	2	63975456	63975486	GTGAGCCACTGTGCCTGGCCNNNNNNNN
chr1	chr1	114	chr1	GTGAGCCACCATGCCTGGCCTGGTTTTCAT	2	150494073	150494103	GTGAGCCACTGTGCCTGGCCNNNNNNNN
chr11	chr11	114	chr11	GTGAGCCACTGTGCCTGACCAAGCTCTTTT	1	10257704	10257734	GTGAGCCACTGTGCCTGGCCNNNNNNNN
chr10	chr10	114	chr10	GTGAGCCACCGTGCCTGGCCAGGATCACTC	1	14197640	14197670	GTGAGCCACTGTGCCTGGCCNNNNNNNN
chr10	chr10	114	chr10	GTGAGCCACTGCACCTGGCCAGGGTCCCAA	2	13048471	13048501	GTGAGCCACTGTGCCTGGCCNNNNNNNN
chrX	chrX	113	chrX	GTGAGCCACTGTGCCAGGCCAGGTTTGCTA	1	19171432	19171462	GTGAGCCACTGTGCCTGGCCNNNNNNNN
chr8	chr8	113	chr8	ATGAGCCACCGTGCCTGGCCAGGGCCTGAT	2	53911640	53911670	GTGAGCCACTGTGCCTGGCCNNNNNNNN
chr8	chr8	113	chr8	GTGAGCCACTGTGCCTGGCCAGGTTATTTC	0	28608570	28608600	GTGAGCCACTGTGCCTGGCCNNNNNNNN
chr5	chr5	113	chr5	GTGAGCCACCGTGCCTGGCCAGGGCTTAGC	1	157026429	157026459	GTGAGCCACTGTGCCTGGCCNNNNNNNN
chr4	chr4	113	chr4	GTGAGCCACTGTGCCTGGCATGGTTTGAAT	1	15750304	15750334	GTGAGCCACTGTGCCTGGCCNNNNNNNN
chr3	chr3	113	chr3	GTGAGCCACTGCGCCTGGCCCGGTTATGTC	1	49039064	49039094	GTGAGCCACTGTGCCTGGCCNNNNNNNN
chr2	chr2	113	chr2	GTGAGCCACTGTGCCCAGCCTGGCCCCCAT	2	54411044	54411074	GTGAGCCACTGTGCCTGGCCNNNNNNNN
chr22	chr22	113	chr22	GTGAGCCACTGCACCTGGCCAGAACAACTG	2	37965286	37965316	GTGAGCCACTGTGCCTGGCCNNNNNNNN
chr2	chr2	113	chr2	GTGAGCCACTGCGCCTGGCCTGGGTTGTTT	1	22475952	22475982	GTGAGCCACTGTGCCTGGCCNNNNNNNN
chr2	chr2	113	chr2	GTGAGCCACCATGCCTGGCCTGGATTCGGG	2	21054982	21055012	GTGAGCCACTGTGCCTGGCCNNNNNNNN
chr2	chr2	113	chr2	ATGAGCCACCATGCCTGGCCAGGTAGATAT	3	164203850	164203880	GTGAGCCACTGTGCCTGGCCNNNNNNNN
chr21	chr21	113	chr21	GTGAGCCACTGTGCCCAGCCAGGTTTTTTT	2	43890692	43890722	GTGAGCCACTGTGCCTGGCCNNNNNNNN
chr21	chr21	113	chr21	GTGAGCCACTGTGCCCGGCCAGGTTTCCAC	1	31953513	31953543	GTGAGCCACTGTGCCTGGCCNNNNNNNN
chr2	chr2	113	chr2	GTGAGCCACTGTGCCTGGCAGGGATAAAGA	1	119674255	119674285	GTGAGCCACTGTGCCTGGCCNNNNNNNN
chr19	chr19	113	chr19	GTGAGCCATTGCGCCTGGCCAGGAGGTGAC	2	45117192	45117222	GTGAGCCACTGTGCCTGGCCNNNNNNNN
chr19	chr19	113	chr19	ATGAGCCACTGCGCCTGGCCAGGTTTGATT	2	10090305	10090335	GTGAGCCACTGTGCCTGGCCNNNNNNNN
chr18	chr18	113	chr18	GTGAGCCACCGTGCCTGACCTGGATTTGGT	2	25403593	25403623	GTGAGCCACTGTGCCTGGCCNNNNNNNN
chr17	chr17	113	chr17	GTGAGCCACCATGCCTGGCCTGGAAACAAC	2	41882076	41882106	GTGAGCCACTGTGCCTGGCCNNNNNNNN
chr16	chr16	113	chr16	AAGAGCCACTGTGCCTGGCCAGGGTGTGGT	2	6944104	6944134	GTGAGCCACTGTGCCTGGCCNNNNNNNN
chr14	chr14	113	chr14	ATGAGCCACCATGCCTGGCCTGGTCTTCCC	3	77622124	77622154	GTGAGCCACTGTGCCTGGCCNNNNNNNN
chr14	chr14	113	chr14	GTGAGCCACCATGCCTGGCCTGGATCCACA	2	39375403	39375433	GTGAGCCACTGTGCCTGGCCNNNNNNNN
chr13	chr13	113	chr13	GTGAGCCACTGTGCCTGGCCTGGGTATAAT	0	32043902	32043932	GTGAGCCACTGTGCCTGGCCNNNNNNNN
chr12	chr12	113	chr12	GTGAGCCACCGTGCCTGGCCTGGTTGAGTG	1	57701555	57701585	GTGAGCCACTGTGCCTGGCCNNNNNNNN
chr11	chr11	113	chr11	GTGAGCCACCGTGCCTGGCCTGGAAGTGTG	1	85707817	85707847	GTGAGCCACTGTGCCTGGCCNNNNNNNN
chr11	chr11	113	chr11	GTGAGCCACTGTGCCTGGCCAGGTTCAGGT	0	65518168	65518198	GTGAGCCACTGTGCCTGGCCNNNNNNNN
chr11	chr11	113	chr11	GTGAGCCACCGTGCCTGGCCTGGAATGCAT	1	36108018	36108048	GTGAGCCACTGTGCCTGGCCNNNNNNNN
chr11	chr11	113	chr11	GTGAGCCACCATGCCTGGCCAGGGGTCAGT	2	32537960	32537990	GTGAGCCACTGTGCCTGGCCNNNNNNNN
chr11	chr11	113	chr11	GTGAGCCACCATGCCTGGCCTGGACTGGGC	2	102525162	102525192	GTGAGCCACTGTGCCTGGCCNNNNNNNN
chr10	chr10	113	chr10	GTGAGCCACTGTGCCTGGCTGGGATGTCCT	1	1076059	1076089	GTGAGCCACTGTGCCTGGCCNNNNNNNN
chr7	chr7	112	chr7	GTGAGCCACCGTGCCTGGCCAGGACTGCTA	1	66054885	66054915	GTGAGCCACTGTGCCTGGCCNNNNNNNN
chr7	chr7	112	chr7	GTGAGCCACTGCACCTGGCCTGGTTTTTAA	2	148915892	148915922	GTGAGCCACTGTGCCTGGCCNNNNNNNN
chr6	chr6	112	chr6	GTGAGCCACCATGCCTGGCCGGGAGCAGCA	2	42788501	42788531	GTGAGCCACTGTGCCTGGCCNNNNNNNN
chr6	chr6	112	chr6	GTGAGCCACTGTGCCCGGCCTGGAAAAAGT	1	111115488	111115518	GTGAGCCACTGTGCCTGGCCNNNNNNNN
chr4	chr4	112	chr4	GTGAGCCACCGTGCCTGGCCAGGATTTGTT	1	2140356	2140386	GTGAGCCACTGTGCCTGGCCNNNNNNNN
chr3	chr3	112	chr3	ATGAGCCACTGTGCCTGGCCAGGTTCACAT	1	184013533	184013563	GTGAGCCACTGTGCCTGGCCNNNNNNNN
chr2	chr2	112	chr2	GTGAGCCACCGTGCCTGGCCAGGGCTTCTG	1	46851757	46851787	GTGAGCCACTGTGCCTGGCCNNNNNNNN
chr22	chr22	112	chr22	ATGAGCCACTGCACCTGGCCAGGATTATTT	3	40916000	40916030	GTGAGCCACTGTGCCTGGCCNNNNNNNN
chr22	chr22	112	chr22	GTGAGCCACCATGCCTGGCCTGGTATTTTG	2	19092055	19092085	GTGAGCCACTGTGCCTGGCCNNNNNNNN
chr21	chr21	112	chr21	GTGAGCCACTGTGCCTGGCCTGGGGATTAC	0	44347529	44347559	GTGAGCCACTGTGCCTGGCCNNNNNNNN
chr21	chr21	112	chr21	ATGAGCCACCGCGCCTGGCCTGGAGCAGGT	3	25559670	25559700	GTGAGCCACTGTGCCTGGCCNNNNNNNN
chr20	chr20	112	chr20	ATGAACCACTGTGCCTGGCCAGGTTTTTTT	2	62290699	62290729	GTGAGCCACTGTGCCTGGCCNNNNNNNN
chr20	chr20	112	chr20	GTGAGCCACTGAGCCTGGCCAGGAGTTGTC	1	45281823	45281853	GTGAGCCACTGTGCCTGGCCNNNNNNNN
chr20	chr20	112	chr20	ATGAGCCACTGTGCCTGGCCAGGTCTTCTG	1	38984189	38984219	GTGAGCCACTGTGCCTGGCCNNNNNNNN
chr20	chr20	112	chr20	GTGAGCCACTGCACCTGGCCTGGAGTGTAT	2	32215168	32215198	GTGAGCCACTGTGCCTGGCCNNNNNNNN
chr19	chr19	112	chr19	GTGAGCCACCATGCCTGGCCGGGGCAGGGT	2	5653742	5653772	GTGAGCCACTGTGCCTGGCCNNNNNNNN
chr17	chr17	112	chr17	GTGAGCCACTGTGCCTGGCTGGGATTTGCT	1	4020616	4020646	GTGAGCCACTGTGCCTGGCCNNNNNNNN
chr17	chr17	112	chr17	GTGAGCCACCATGCCTGGCCAGGTTATGCA	2	3741784	3741814	GTGAGCCACTGTGCCTGGCCNNNNNNNN
chr16	chr16	112	chr16	GTGAGCCACTGTGCCCGGCCTGGACGAAAC	1	78815032	78815062	GTGAGCCACTGTGCCTGGCCNNNNNNNN
chr15	chr15	112	chr15	GTGAGCCACCGTGCCTGGCCAGGAAATGCA	1	98564756	98564786	GTGAGCCACTGTGCCTGGCCNNNNNNNN
chr1	chr1	112	chr1	GTGAGCCACTGCGCCTGGCCTGGTTAGTCT	1	50501372	50501402	GTGAGCCACTGTGCCTGGCCNNNNNNNN
chr14	chr14	112	chr14	TTGAGCCACTGTGCCTGGCCCGGACTCCTT	1	67660292	67660322	GTGAGCCACTGTGCCTGGCCNNNNNNNN
chr14	chr14	112	chr14	GTGAGCCACCGTGCCTGGCCGGGGTGGGCA	1	51141979	51142009	GTGAGCCACTGTGCCTGGCCNNNNNNNN
chr12	chr12	112	chr12	GTGAGCCACCGTGCCTGGCCTGGCCAGGCT	1	122432100	122432130	GTGAGCCACTGTGCCTGGCCNNNNNNNN
chr9	chr9	111	chr9	CTGAGCCACTGTGCCTGGCCTGGAAAGTTG	1	127708186	127708216	GTGAGCCACTGTGCCTGGCCNNNNNNNN
chr8	chr8	111	chr8	ATGAGCCACCGTGCCTGGCCTGGAATTACT	2	62356819	62356849	GTGAGCCACTGTGCCTGGCCNNNNNNNN
chr7	chr7	111	chr7	GTGAGCCACCATGCCTGGCCAGGTTTCTTC	2	27644173	27644203	GTGAGCCACTGTGCCTGGCCNNNNNNNN
chr5	chr5	111	chr5	GCGAGCCACTGTGCCTGGCCAGGGTCTTTA	1	78936403	78936433	GTGAGCCACTGTGCCTGGCCNNNNNNNN
chr5	chr5	111	chr5	ATGAGCCACTACGCCTGGCCTGGCTGGGGC	3	14495529	14495559	GTGAGCCACTGTGCCTGGCCNNNNNNNN
chr5	chr5	111	chr5	GTGAGCCACCGTGCCTGGCCTGGTGGAGAA	1	133689769	133689799	GTGAGCCACTGTGCCTGGCCNNNNNNNN
chr4	chr4	111	chr4	GTGAGCCACCATGCCTGGCCAGGCTTAAGT	2	71812826	71812856	GTGAGCCACTGTGCCTGGCCNNNNNNNN
chr4	chr4	111	chr4	GTGAGCCACTGTGCCTGGCCTGGGGTCTCT	0	54618683	54618713	GTGAGCCACTGTGCCTGGCCNNNNNNNN
chr4	chr4	111	chr4	GTGAGCCACTGTGCCTGACCAGGATTGTTT	1	151003103	151003133	GTGAGCCACTGTGCCTGGCCNNNNNNNN
chr4	chr4	111	chr4	ATGAGCCACAGTGCCTGGCCAGGATCATTT	2	139105592	139105622	GTGAGCCACTGTGCCTGGCCNNNNNNNN
chr2	chr2	111	chr2	GTGAGCCATTGTGCCTGGCCAGGCCATATT	1	200819099	200819129	GTGAGCCACTGTGCCTGGCCNNNNNNNN
chr20	chr20	111	chr20	GTGAGCCACTGTGCCCAGCCGGGTTTAATG	2	38468240	38468270	GTGAGCCACTGTGCCTGGCCNNNNNNNN
chr20	chr20	111	chr20	GTGAGCCACTGTGCCCAGCCAGGATCCAGG	2	32072832	32072862	GTGAGCCACTGTGCCTGGCCNNNNNNNN
chr19	chr19	111	chr19	ATGAGCCACCATGCCTGGCCTGGGTCTTAT	3	46596338	46596368	GTGAGCCACTGTGCCTGGCCNNNNNNNN
chr19	chr19	111	chr19	ATGAGCCACCATGCCTGGCCTGGAATGATG	3	45136062	45136092	GTGAGCCACTGTGCCTGGCCNNNNNNNN
chr19	chr19	111	chr19	ATGAGCCACTGCGCCTGGCCTGGTTTCTTC	2	18304109	18304139	GTGAGCCACTGTGCCTGGCCNNNNNNNN
chr18	chr18	111	chr18	GTGAGCCACCGTGCCTGGCCTGGAACAGTT	1	9488297	9488327	GTGAGCCACTGTGCCTGGCCNNNNNNNN
chr17	chr17	111	chr17	GTGAGCCACCATGCCTGGCCTGGCGGTCCT	2	50441454	50441484	GTGAGCCACTGTGCCTGGCCNNNNNNNN
chr17	chr17	111	chr17	ATGAGCCACTGCGCCTGGCCCGGATAAACC	2	19692840	19692870	GTGAGCCACTGTGCCTGGCCNNNNNNNN
chr17	chr17	111	chr17	GTGAGCCACTGTGCCTGGCCAGGTTGTTGT	0	17525702	17525732	GTGAGCCACTGTGCCTGGCCNNNNNNNN
chr16	chr16	111	chr16	GTGAGCCACTACGCCTGGCCTGGAGCTTGA	2	89814650	89814680	GTGAGCCACTGTGCCTGGCCNNNNNNNN
chr16	chr16	111	chr16	ATGAGCCACCATGCCTGGCCTGGATTGCAT	3	87156875	87156905	GTGAGCCACTGTGCCTGGCCNNNNNNNN
chr16	chr16	111	chr16	GTGAGCCATTGTGCCTGGCCTGGGATTTTC	1	67569463	67569493	GTGAGCCACTGTGCCTGGCCNNNNNNNN
chr16	chr16	111	chr16	GTGAGTCACTGTGCCTGGCCAGGTTACAGT	1	27578857	27578887	GTGAGCCACTGTGCCTGGCCNNNNNNNN
chr16	chr16	111	chr16	GTGAGCCACCATGCCTGGCCTGGGACTAGC	2	15568924	15568954	GTGAGCCACTGTGCCTGGCCNNNNNNNN
chr15	chr15	111	chr15	GTGAGCCACTGCGCCTGGCCTGGATTTCTC	1	96134562	96134592	GTGAGCCACTGTGCCTGGCCNNNNNNNN
chr15	chr15	111	chr15	ATGAGCCACTGTGCCTGGCCAGGTTTATCT	1	75240406	75240436	GTGAGCCACTGTGCCTGGCCNNNNNNNN
chr13	chr13	111	chr13	ATGAGCCACTGTGCCTGGCCAGGTTTTATT	1	95416026	95416056	GTGAGCCACTGTGCCTGGCCNNNNNNNN
chr13	chr13	111	chr13	GTGAGCCACTGCGCCTGGCCAAGAAGCCAG	1	92138228	92138258	GTGAGCCACTGTGCCTGGCCNNNNNNNN
chr1	chr1	111	chr1	GTGAGCCACTGTGCCTGGCCAGGAAGATTT	0	240197948	240197978	GTGAGCCACTGTGCCTGGCCNNNNNNNN
chr1	chr1	111	chr1	ATGAGCCACTGCACCTGGCCTGGTTTGCTT	3	235159577	235159607	GTGAGCCACTGTGCCTGGCCNNNNNNNN
chr1	chr1	111	chr1	ATGAGCCACCATGCCTGGCCAGGTCCCCTA	3	216948264	216948294	GTGAGCCACTGTGCCTGGCCNNNNNNNN
chr1	chr1	111	chr1	ATGAGCCACTGTGCCCGGCCCGGATCTGAC	2	206775331	206775361	GTGAGCCACTGTGCCTGGCCNNNNNNNN
chr11	chr11	111	chr11	ATGAGCCACTGTGCCTGCCCTGGCAGTTTA	2	33020782	33020812	GTGAGCCACTGTGCCTGGCCNNNNNNNN
chr8	chr8	110	chr8	GTGAGCCACCGTGCCTGGCCAGGAACAGCT	1	60263048	60263078	GTGAGCCACTGTGCCTGGCCNNNNNNNN
chr8	chr8	110	chr8	GTGAGCCACTGCGCCTGGCCTGGATTATTC	1	123164429	123164459	GTGAGCCACTGTGCCTGGCCNNNNNNNN
chr6	chr6	110	chr6	GTGAGCCACCATGCCTGGCCAGGTATTTCT	2	167511842	167511872	GTGAGCCACTGTGCCTGGCCNNNNNNNN
chr6	chr6	110	chr6	ATGAGCCACTGTGCCCGGCCTGGAAGGCTG	2	160978034	160978064	GTGAGCCACTGTGCCTGGCCNNNNNNNN
chr5	chr5	110	chr5	ATGAGCCACTGTGCCTGGCCCAGAACAGTA	1	176458683	176458713	GTGAGCCACTGTGCCTGGCCNNNNNNNN
chr3	chr3	110	chr3	GTGGGCCACTGTGCCTGGCCAGGCCTCCTA	1	67650464	67650494	GTGAGCCACTGTGCCTGGCCNNNNNNNN
chr3	chr3	110	chr3	ATGAGCCACCATGCCTGGCCAGGAGTGGCT	3	167464293	167464323	GTGAGCCACTGTGCCTGGCCNNNNNNNN
chr3	chr3	110	chr3	GTGAGCCACTGCGCCTGGCCAGGGACAATT	1	15811732	15811762	GTGAGCCACTGTGCCTGGCCNNNNNNNN
chr22	chr22	110	chr22	GTGAGCCACCGTGCCTGGCCTGGAACTTCT	1	24366472	24366502	GTGAGCCACTGTGCCTGGCCNNNNNNNN
chr21	chr21	110	chr21	ATGAGCCACTGTGCCCGGCCAGGAGTTTAT	2	33412834	33412864	GTGAGCCACTGTGCCTGGCCNNNNNNNN
chr21	chr21	110	chr21	GTGAGCCACCATGCCTGGCCAGGTATCAAT	2	31767611	31767641	GTGAGCCACTGTGCCTGGCCNNNNNNNN
chr19	chr19	110	chr19	GTGAACCACTGTGCCTGGCCTGGAATTATT	1	50593297	50593327	GTGAGCCACTGTGCCTGGCCNNNNNNNN
chr19	chr19	110	chr19	ATGAGCCACCATGCCTGGCCAGGGGTTTGC	3	39522424	39522454	GTGAGCCACTGTGCCTGGCCNNNNNNNN
chr18	chr18	110	chr18	GTGAGGCACCGTGCCTGGCCTGGCATGACA	2	33512409	33512439	GTGAGCCACTGTGCCTGGCCNNNNNNNN
chr17	chr17	110	chr17	GTGAGCCACTGTGCCCAGCCAGGGCAACAT	2	76929145	76929175	GTGAGCCACTGTGCCTGGCCNNNNNNNN
chr17	chr17	110	chr17	GTGAGCCACCGCGCCTGGCCAGGAGCATAA	2	72687522	72687552	GTGAGCCACTGTGCCTGGCCNNNNNNNN
chr17	chr17	110	chr17	GTGAGCCACTGTGCCTAGCCTGGAGCCTTC	1	45401049	45401079	GTGAGCCACTGTGCCTGGCCNNNNNNNN
chr17	chr17	110	chr17	GTGAGCCACCGTGCCTGGCCAGGAAGAACG	1	15930575	15930605	GTGAGCCACTGTGCCTGGCCNNNNNNNN
chr17	chr17	110	chr17	GTGAGCCACCATGCCTGGCCAGGCATCTTA	2	15549438	15549468	GTGAGCCACTGTGCCTGGCCNNNNNNNN
chr16	chr16	110	chr16	ATGAGCCACAGTGCCTGGCCTGGATATTAA	2	90069761	90069791	GTGAGCCACTGTGCCTGGCCNNNNNNNN
chr1	chr1	110	chr1	ATGAGCCACTATGTCTGGCCTGGTGTATTT	3	52850733	52850763	GTGAGCCACTGTGCCTGGCCNNNNNNNN
chr12	chr12	110	chr12	ATGAGCCACTGTGCCTGGCCAGGTTTTTGA	1	117844854	117844884	GTGAGCCACTGTGCCTGGCCNNNNNNNN
chr1	chr1	110	chr1	GTGAGCCACTGTGCCTGGCCAGGCCAGGCC	0	181502978	181503008	GTGAGCCACTGTGCCTGGCCNNNNNNNN
chr1	chr1	110	chr1	ATGAGCCACTGTGCCTGGCCTGGCGTCTGT	1	153205688	153205718	GTGAGCCACTGTGCCTGGCCNNNNNNNN
chr10	chr10	110	chr10	GTGAGCCACAATGCCTGGCCTGGCATCATG	2	80134543	80134573	GTGAGCCACTGTGCCTGGCCNNNNNNNN
chr10	chr10	110	chr10	GTGAGGCACTGTGCCTGGCCTGGTTGCAAA	1	73029117	73029147	GTGAGCCACTGTGCCTGGCCNNNNNNNN
chr10	chr10	110	chr10	GTGAGCCACCATGCCTGGCCGGGGATTTTC	2	70198065	70198095	GTGAGCCACTGTGCCTGGCCNNNNNNNN
chr10	chr10	110	chr10	GTGAGCCACTGTGCCTGGCTAGGTCTTGTG	1	64534283	64534313	GTGAGCCACTGTGCCTGGCCNNNNNNNN
chrX	chrX	109	chrX	GTGAGCCACTGTGCCTAGCCAGGATATTCT	1	134277566	134277596	GTGAGCCACTGTGCCTGGCCNNNNNNNN
chr9	chr9	109	chr9	ATGAGCCACTGTACCTGGCCTGGTGGTATA	2	96189460	96189490	GTGAGCCACTGTGCCTGGCCNNNNNNNN
chr9	chr9	109	chr9	ATGAGCCACTGTGCCTGGCCAGGAATATAT	1	84052840	84052870	GTGAGCCACTGTGCCTGGCCNNNNNNNN
chr9	chr9	109	chr9	GTGAGCCACTGTGCCCGGCCGGGACACTCA	1	34231910	34231940	GTGAGCCACTGTGCCTGGCCNNNNNNNN
chr8	chr8	109	chr8	ATGAGCCACTATGCCTGGCCCGGTTTTAAT	2	19125953	19125983	GTGAGCCACTGTGCCTGGCCNNNNNNNN
chr8	chr8	109	chr8	GTGAGCCACCGTGCCTAGCCAGGACTAACT	2	123092294	123092324	GTGAGCCACTGTGCCTGGCCNNNNNNNN
chr7	chr7	109	chr7	ATGAACCACTGTGCCTGGCCAGGTGTTTTT	2	100243922	100243952	GTGAGCCACTGTGCCTGGCCNNNNNNNN
chr6	chr6	109	chr6	ATGAGCCACTGCACCTGGCCAGGAGCAAAT	3	149607323	149607353	GTGAGCCACTGTGCCTGGCCNNNNNNNN
chr5	chr5	109	chr5	GTGAGCCACTGTGCCTGGCCAGGCCAGTGA	0	79727195	79727225	GTGAGCCACTGTGCCTGGCCNNNNNNNN
chr2	chr2	109	chr2	ATGAGCCACTGTGCCTGGCCTGGAATGATT	1	230592336	230592366	GTGAGCCACTGTGCCTGGCCNNNNNNNN
chr2	chr2	109	chr2	ATGAGCCACCGTGCCTGGCCTGGGCAAGGA	2	191750451	191750481	GTGAGCCACTGTGCCTGGCCNNNNNNNN
chr21	chr21	109	chr21	GTGAGCCACTGCGCCTGGCCAGGATCTTGT	1	36858067	36858097	GTGAGCCACTGTGCCTGGCCNNNNNNNN
chr19	chr19	109	chr19	GTGAGCCACCGCGCCTGGCCTGGCCCGCCT	2	48412495	48412525	GTGAGCCACTGTGCCTGGCCNNNNNNNN
chr19	chr19	109	chr19	GTGAGCCACCGTGCCTGGCCAGGGGAGGAT	1	38997821	38997851	GTGAGCCACTGTGCCTGGCCNNNNNNNN
chr17	chr17	109	chr17	GTGAGCCACTATGCCTGGCCTGGGTTACAT	1	76259838	76259868	GTGAGCCACTGTGCCTGGCCNNNNNNNN
chr17	chr17	109	chr17	ATGAGCCACTGTGCCCGGCCAGGAAAAGTT	2	49073539	49073569	GTGAGCCACTGTGCCTGGCCNNNNNNNN
chr16	chr16	109	chr16	GTGAGCCACTGTGCCTGGCCTGGAATTTAG	0	87087613	87087643	GTGAGCCACTGTGCCTGGCCNNNNNNNN
chr16	chr16	109	chr16	GTGAGCCACTGTGCCTGGCCAGGGGGATGG	0	85133081	85133111	GTGAGCCACTGTGCCTGGCCNNNNNNNN
chr16	chr16	109	chr16	GTGAGCCACCGTGCCTGGCCAGGTGTGAGG	1	3039566	3039596	GTGAGCCACTGTGCCTGGCCNNNNNNNN
chr15	chr15	109	chr15	ATGAGTCATTGTGCCTGGCCAGGAATCTCA	3	72106185	72106215	GTGAGCCACTGTGCCTGGCCNNNNNNNN
chr1	chr1	109	chr1	ATGAGCCACCCTGCCTGGCCTGGCACTTTT	3	55191769	55191799	GTGAGCCACTGTGCCTGGCCNNNNNNNN
chr1	chr1	109	chr1	GTGAGCCACTGTGCCCGGCCAGGACATTAT	1	32935418	32935448	GTGAGCCACTGTGCCTGGCCNNNNNNNN
chr1	chr1	109	chr1	GTGAGCCACTGCACCTGGCCAGGAGCCTTC	2	217494446	217494476	GTGAGCCACTGTGCCTGGCCNNNNNNNN
chr12	chr12	109	chr12	GTGAGCCACCGTGCCTGGCCTGGAGTTTTA	1	108379235	108379265	GTGAGCCACTGTGCCTGGCCNNNNNNNN
chr11	chr11	109	chr11	ATGAGCCACCATGCCTGGCCAGGTTACATT	3	78058694	78058724	GTGAGCCACTGTGCCTGGCCNNNNNNNN
chr11	chr11	109	chr11	GTGAGCCACTGTGCCTGGCCAGGCTGCGCT	0	65208487	65208517	GTGAGCCACTGTGCCTGGCCNNNNNNNN
chr1	chr1	109	chr1	GTGAGCCACTGCACCTGGCCAGGTTTTCTA	2	151348745	151348775	GTGAGCCACTGTGCCTGGCCNNNNNNNN
chr10	chr10	109	chr10	GTGAGCCACTGTGCCTGGCTGGGATTTGAA	1	101724499	101724529	GTGAGCCACTGTGCCTGGCCNNNNNNNN
chrX	chrX	108	chrX	GTGAGCCACTGCACCTGGCCTGGTCTATCT	2	67861626	67861656	GTGAGCCACTGTGCCTGGCCNNNNNNNN
chrX	chrX	108	chrX	ATGAGCCACCATGCCTGGCCTGGGATTGTT	3	123868437	123868467	GTGAGCCACTGTGCCTGGCCNNNNNNNN
chr7	chr7	108	chr7	GTGAGCCACTGTGCCCAGCCTGGCAGTAGA	2	92555043	92555073	GTGAGCCACTGTGCCTGGCCNNNNNNNN
chr7	chr7	108	chr7	GTGAGCCACTGCACCTGGCCAGGGTAACTT	2	74487316	74487346	GTGAGCCACTGTGCCTGGCCNNNNNNNN
chr7	chr7	108	chr7	ATGAGCCACTGCACCTGGCCAGGAAAGTTT	3	151979736	151979766	GTGAGCCACTGTGCCTGGCCNNNNNNNN
chr7	chr7	108	chr7	ATGAGCCACCGTGCCTGGCCCAGAGTGATA	2	135217131	135217161	GTGAGCCACTGTGCCTGGCCNNNNNNNN
chr7	chr7	108	chr7	ATAAGCCACTGTGCCTGGCCAGGAACTCAG	2	100086241	100086271	GTGAGCCACTGTGCCTGGCCNNNNNNNN
chr5	chr5	108	chr5	ATGAGCCACTGTGCCTGGCCAGGTATTTCT	1	29530787	29530817	GTGAGCCACTGTGCCTGGCCNNNNNNNN
chr5	chr5	108	chr5	GTGAGCCACCGTGCCTGGCCAGGAAATAAA	1	139937081	139937111	GTGAGCCACTGTGCCTGGCCNNNNNNNN
chr4	chr4	108	chr4	GTGAGCCACTGTGCCTGGCCTGGAACTAGG	0	55378049	55378079	GTGAGCCACTGTGCCTGGCCNNNNNNNN
chr3	chr3	108	chr3	ATGAGCCACCATGCCTGGCCTGGCATTGAT	3	104011784	104011814	GTGAGCCACTGTGCCTGGCCNNNNNNNN
chr2	chr2	108	chr2	GTGAGCCACTGTGCCTGGCCAGGATGAGAG	0	24455604	24455634	GTGAGCCACTGTGCCTGGCCNNNNNNNN
chr22	chr22	108	chr22	ATGAGCCACCGTGCCTGGCCAGGAGTTTAT	2	26566124	26566154	GTGAGCCACTGTGCCTGGCCNNNNNNNN
chr2	chr2	108	chr2	ATGAGCCACCGTGCCTGGCCAGGAGGAATG	2	172054229	172054259	GTGAGCCACTGTGCCTGGCCNNNNNNNN
chr2	chr2	108	chr2	ATGAGCCACTGCACCTGGCCAGGATATTAA	3	148410729	148410759	GTGAGCCACTGTGCCTGGCCNNNNNNNN
chr21	chr21	108	chr21	GTGAGCCACCGTGCCTGGCCAGGATAGGTT	1	28289011	28289041	GTGAGCCACTGTGCCTGGCCNNNNNNNN
chr20	chr20	108	chr20	GTGAGCCACTGTGCCTGGCCAGGAAAATTT	0	56869494	56869524	GTGAGCCACTGTGCCTGGCCNNNNNNNN
chr20	chr20	108	chr20	TTGAGCCACTGTGCCTGGCCAGGTATTTCT	1	52394335	52394365	GTGAGCCACTGTGCCTGGCCNNNNNNNN
chr19	chr19	108	chr19	GTGAGCCACTGTGCCTGGCCAGGAAGTAGA	0	41200653	41200683	GTGAGCCACTGTGCCTGGCCNNNNNNNN
chr18	chr18	108	chr18	ATGAGCCACCGTGCCTGGCCTGGTATGGTA	2	50710190	50710220	GTGAGCCACTGTGCCTGGCCNNNNNNNN
chr17	chr17	108	chr17	GTGAGCCACTGCACCTGGCCTGGACTGTTC	2	74929705	74929735	GTGAGCCACTGTGCCTGGCCNNNNNNNN
chr1	chr1	108	chr1	ATGAGCCACTATGCCTGGCCTGGAATTTTA	2	67183941	67183971	GTGAGCCACTGTGCCTGGCCNNNNNNNN
chr14	chr14	108	chr14	GTGAGCCACTGTGCCCGGCCCGGGGTCTGG	1	54485959	54485989	GTGAGCCACTGTGCCTGGCCNNNNNNNN
chr1	chr1	108	chr1	ATGAGCCACCGTGCCTGGCCTGGGGTATTA	2	45335564	45335594	GTGAGCCACTGTGCCTGGCCNNNNNNNN
chr13	chr13	108	chr13	GTGAGCCACCGTGCCTGGCCCAGGGGAAAA	1	79458985	79459015	GTGAGCCACTGTGCCTGGCCNNNNNNNN
chr13	chr13	108	chr13	GTGAGCCACTATGCCTGGCCGGGCATTTCT	1	44793359	44793389	GTGAGCCACTGTGCCTGGCCNNNNNNNN
chr12	chr12	108	chr12	ATGAGCCACCGTGCCTGGCCAGGTTTGCAT	2	6658393	6658423	GTGAGCCACTGTGCCTGGCCNNNNNNNN
chr12	chr12	108	chr12	GTGAACCACTGCGCCTGGCCAGGTGTGCTG	2	57790347	57790377	GTGAGCCACTGTGCCTGGCCNNNNNNNN
chr1	chr1	108	chr1	GTGAGCCACTGCGCCTGGCCTGGGATGTCT	1	212733146	212733176	GTGAGCCACTGTGCCTGGCCNNNNNNNN
chr11	chr11	108	chr11	ATGAGCCACTGCGCCTGGCCTGGAATTTTC	2	921130	921160	GTGAGCCACTGTGCCTGGCCNNNNNNNN
chr11	chr11	108	chr11	ATGAGCCGCTGTGCCTGGCCTGGGTTGAAT	2	87161177	87161207	GTGAGCCACTGTGCCTGGCCNNNNNNNN
chr1	chr1	108	chr1	ATGAGCCACCATGCCTGGCCAGGAAGCCTA	3	145731378	145731408	GTGAGCCACTGTGCCTGGCCNNNNNNNN
chr9	chr9	107	chr9	GTGAGCCACCGTGCCTGGCCAGGATTGTTT	1	111473674	111473704	GTGAGCCACTGTGCCTGGCCNNNNNNNN
chr6	chr6	107	chr6	ATGAGTCACTGTGCCTGGCCAGGGTAGCGA	2	43536122	43536152	GTGAGCCACTGTGCCTGGCCNNNNNNNN
chr4	chr4	107	chr4	GTGAGCCACTGCACCTGGCCTGGTATTGTA	2	155793356	155793386	GTGAGCCACTGTGCCTGGCCNNNNNNNN
chr3	chr3	107	chr3	GTGAGCCACCGTGCCTGGCCAGGGAGAGTG	1	48677096	48677126	GTGAGCCACTGTGCCTGGCCNNNNNNNN
chr3	chr3	107	chr3	GTGAGCCACTGCGCCTGGCCGGGAGTCTTA	1	47609204	47609234	GTGAGCCACTGTGCCTGGCCNNNNNNNN
chr3	chr3	107	chr3	ATGAGCCAATGTGCCTGGCCAGGTGATTCT	2	37219938	37219968	GTGAGCCACTGTGCCTGGCCNNNNNNNN
chr3	chr3	107	chr3	GTGAGCCACTGTGCCTGGCCAGGATCCTTT	0	172541399	172541429	GTGAGCCACTGTGCCTGGCCNNNNNNNN
chr22	chr22	107	chr22	GTGAGCCACCGTGCCTGGCCTGGACACTGA	1	47321751	47321781	GTGAGCCACTGTGCCTGGCCNNNNNNNN
chr22	chr22	107	chr22	GTGAGCCACAGCGCCTGGCCTGGAGTGCAT	2	35786627	35786657	GTGAGCCACTGTGCCTGGCCNNNNNNNN
chr2	chr2	107	chr2	GTGAGCCACTGTGCCTGGCCAAGCCTGAAA	0	218338168	218338198	GTGAGCCACTGTGCCTGGCCNNNNNNNN
chr2	chr2	107	chr2	ATGAGCCACTGCACCTGGCCTGGGATACAG	3	216049925	216049955	GTGAGCCACTGTGCCTGGCCNNNNNNNN
chr19	chr19	107	chr19	GTGAGCCAATGTGCCTGGCCAGGGTGAATG	1	16005375	16005405	GTGAGCCACTGTGCCTGGCCNNNNNNNN
chr19	chr19	107	chr19	GTGAGCCACCGTGCCTGGCCGGGTTTTATA	1	11574509	11574539	GTGAGCCACTGTGCCTGGCCNNNNNNNN
chr17	chr17	107	chr17	GTGAGCCACCGTGCCTGGCCTGGATCATAT	1	7997634	7997664	GTGAGCCACTGTGCCTGGCCNNNNNNNN
chr17	chr17	107	chr17	GTGAGCCACTGTGCCTGGCCGGGGAGACTT	0	10788898	10788928	GTGAGCCACTGTGCCTGGCCNNNNNNNN
chr16	chr16	107	chr16	GTGAGCCACTGTGCCTGGCCCGGAGTGTTA	0	89653328	89653358	GTGAGCCACTGTGCCTGGCCNNNNNNNN
chr16	chr16	107	chr16	GTGAGCCACTGTGCCTGGCCTGGTTTTATT	0	29081323	29081353	GTGAGCCACTGTGCCTGGCCNNNNNNNN
chr16	chr16	107	chr16	GTGAGCCACTGTGCCTGGCCTGGACTTCAA	0	21972809	21972839	GTGAGCCACTGTGCCTGGCCNNNNNNNN
chr14	chr14	107	chr14	GTGAGCCACTGCACCTGGCCAGGTTTGATA	2	77553439	77553469	GTGAGCCACTGTGCCTGGCCNNNNNNNN
chr14	chr14	107	chr14	GTGAGCCACTGTGCCCAGCCAGGAATATTT	2	52645712	52645742	GTGAGCCACTGTGCCTGGCCNNNNNNNN
chr1	chr1	107	chr1	ATGAGCCACTGTGCCTGGCCCAGCACTTAA	1	32030956	32030986	GTGAGCCACTGTGCCTGGCCNNNNNNNN
chr12	chr12	107	chr12	GTGAGCCACTGCGCCTGGCCTGGAGCATCT	1	92007545	92007575	GTGAGCCACTGTGCCTGGCCNNNNNNNN
chr12	chr12	107	chr12	ATGAGCCACCGTGCCTGGCCAGGTCAGTTT	2	76244859	76244889	GTGAGCCACTGTGCCTGGCCNNNNNNNN
chr1	chr1	107	chr1	GTGAGCCACTGCGCCTGGCCTGGTTATTTT	1	236375363	236375393	GTGAGCCACTGTGCCTGGCCNNNNNNNN
chr1	chr1	107	chr1	GTGAGCCACTGTACCTGGCCGGGTCTTTGT	1	215327774	215327804	GTGAGCCACTGTGCCTGGCCNNNNNNNN
chr11	chr11	107	chr11	GTGAGCCACTATGCCTAGCCTGGATTTGTA	2	74742416	74742446	GTGAGCCACTGTGCCTGGCCNNNNNNNN
chr1	chr1	107	chr1	ATGAGCCACCGTGCCTGGCCTGGACTCTCT	2	11171742	11171772	GTGAGCCACTGTGCCTGGCCNNNNNNNN
chr11	chr11	107	chr11	ATGAGCCACTGTGCCTGGTCTGGATGTCAG	2	106698401	106698431	GTGAGCCACTGTGCCTGGCCNNNNNNNN
chr10	chr10	107	chr10	ATGAGCCACTGCGCCTGGCCAGGAATACAT	2	68202140	68202170	GTGAGCCACTGTGCCTGGCCNNNNNNNN
chr10	chr10	107	chr10	GTGAGCCACTGTGCCTGACCGGGTCTCAAA	1	23048554	23048584	GTGAGCCACTGTGCCTGGCCNNNNNNNN
chr9	chr9	106	chr9	ATGAGCCACCGTGCCTGGCCAGGATCTCTA	2	37553613	37553643	GTGAGCCACTGTGCCTGGCCNNNNNNNN
chr7	chr7	106	chr7	ATGAGCCACCATGCCTGGCCGGGAAGGTAA	3	65053228	65053258	GTGAGCCACTGTGCCTGGCCNNNNNNNN
chr7	chr7	106	chr7	GTGAGCCACTGTGCCTGGCCAGGATTTCTG	0	56594535	56594565	GTGAGCCACTGTGCCTGGCCNNNNNNNN
chr7	chr7	106	chr7	GTGAGCCACCGTGCCTGGCCAGGAATGATC	1	30462017	30462047	GTGAGCCACTGTGCCTGGCCNNNNNNNN
chr5	chr5	106	chr5	ATGAGCCACCATGCCTGGCCTGGATCATTA	3	8788876	8788906	GTGAGCCACTGTGCCTGGCCNNNNNNNN
chr4	chr4	106	chr4	ATGAGCCACTGTGCCTGGCCTGGACTTCCA	1	25635525	25635555	GTGAGCCACTGTGCCTGGCCNNNNNNNN
chr2	chr2	106	chr2	ATGAGCCACCATGCCTGGCCAGGACTTCTA	3	86247850	86247880	GTGAGCCACTGTGCCTGGCCNNNNNNNN
chr22	chr22	106	chr22	GTGAGCCACCGTGCCTGGCCCGGGAAGTAA	1	33255217	33255247	GTGAGCCACTGTGCCTGGCCNNNNNNNN
chr20	chr20	106	chr20	ATGAGCCACTGCGCCTGGCCAGGATTTCAA	2	5655273	5655303	GTGAGCCACTGTGCCTGGCCNNNNNNNN
chr20	chr20	106	chr20	GTGAGCCACCATGCCTGGCCTGGCCTGGCC	2	32407733	32407763	GTGAGCCACTGTGCCTGGCCNNNNNNNN
chr19	chr19	106	chr19	GTGAGCCACCGTGCCTGGCCAGGGCTGCTG	1	8837956	8837986	GTGAGCCACTGTGCCTGGCCNNNNNNNN
chr19	chr19	106	chr19	ATGAGCCACTGTGCCTGACCAGGGACACAT	2	47121583	47121613	GTGAGCCACTGTGCCTGGCCNNNNNNNN
chr1	chr1	106	chr1	ATGAGCCACTGTGCCTGGCCAGGAGCCATT	1	92918428	92918458	GTGAGCCACTGTGCCTGGCCNNNNNNNN
chr17	chr17	106	chr17	GTGAGCCACCGCGCCTGGCCAGGTCAGTAA	2	57100293	57100323	GTGAGCCACTGTGCCTGGCCNNNNNNNN
chr17	chr17	106	chr17	ATGAGCCACTGTGCCCAGCCTGGCCCTTAC	3	42575716	42575746	GTGAGCCACTGTGCCTGGCCNNNNNNNN
chr14	chr14	106	chr14	AGGAGCCACTGTACCTGGCCTGGTTTTAAT	3	73248838	73248868	GTGAGCCACTGTGCCTGGCCNNNNNNNN
chr14	chr14	106	chr14	ATGAGCCATTGTGCCTGGCCTGGAAAAGCT	2	25487317	25487347	GTGAGCCACTGTGCCTGGCCNNNNNNNN
chr1	chr1	106	chr1	ATGAGCCACCGCGCCTGGCCAGGTTCACTT	3	39052731	39052761	GTGAGCCACTGTGCCTGGCCNNNNNNNN
chr12	chr12	106	chr12	GTGAGTCACTGTGCCTGGCCTGGTAAGTCT	1	85442226	85442256	GTGAGCCACTGTGCCTGGCCNNNNNNNN
chr1	chr1	106	chr1	GTGAGCCACTGTGCCCAGCCAGGTGCATTA	2	26976276	26976306	GTGAGCCACTGTGCCTGGCCNNNNNNNN
chr11	chr11	106	chr11	GTGAGCCACTGCGCCTAGCCTGGAGGATCA	2	47967322	47967352	GTGAGCCACTGTGCCTGGCCNNNNNNNN
chr1	chr1	106	chr1	GTGAGCCACCGTGCCTGGCCTGGCCCCACT	1	11270530	11270560	GTGAGCCACTGTGCCTGGCCNNNNNNNN
chr1	chr1	106	chr1	GTGAGCCACTGTGCCTGGCCTAGGATAAAT	0	112598761	112598791	GTGAGCCACTGTGCCTGGCCNNNNNNNN
chr10	chr10	106	chr10	ATGAGCCACTGTGCCTGGTCAGGCCAACAT	2	95566868	95566898	GTGAGCCACTGTGCCTGGCCNNNNNNNN
chr9	chr9	105	chr9	ATGAGCCACCGTGCCCGGCCCGGACACCAA	3	136809484	136809514	GTGAGCCACTGTGCCTGGCCNNNNNNNN
chr7	chr7	105	chr7	GTGAGCCACTGTGCCTGGCCAGGATTAGCT	0	50361585	50361615	GTGAGCCACTGTGCCTGGCCNNNNNNNN
chr6	chr6	105	chr6	ATGAGCCACTGCACCTGGCCTGGACATCTA	3	89033177	89033207	GTGAGCCACTGTGCCTGGCCNNNNNNNN
chr6	chr6	105	chr6	ATGAGCCACTGTGCCTGGCCTAGCTTCTTG	1	31153253	31153283	GTGAGCCACTGTGCCTGGCCNNNNNNNN
chr6	chr6	105	chr6	ATGAGCCACTGTGCCCAGCCTGGAATGCAA	3	150859144	150859174	GTGAGCCACTGTGCCTGGCCNNNNNNNN
chr4	chr4	105	chr4	ATGAGCCACCGTGCCTGGCCAGGACTATCA	2	56555218	56555248	GTGAGCCACTGTGCCTGGCCNNNNNNNN
chr4	chr4	105	chr4	GTGAGCCACCATGCCTGGCCTGGCCTTCAT	2	2452770	2452800	GTGAGCCACTGTGCCTGGCCNNNNNNNN
chr2	chr2	105	chr2	ATGAGCCACCGTGCCTGGCCCGGACACAAG	2	95080018	95080048	GTGAGCCACTGTGCCTGGCCNNNNNNNN
chr2	chr2	105	chr2	GTGAGCCACTGTGCCCAGCCGGGAGGATCC	2	85415996	85416026	GTGAGCCACTGTGCCTGGCCNNNNNNNN
chr22	chr22	105	chr22	GTGAGCCACTGCGCCTGGCCTGGTCTTGAA	1	28975211	28975241	GTGAGCCACTGTGCCTGGCCNNNNNNNN
chr2	chr2	105	chr2	ATGAGCCACTGTGCCTGGCCTGGTTTCTGC	1	224593153	224593183	GTGAGCCACTGTGCCTGGCCNNNNNNNN
chr19	chr19	105	chr19	GTGAGCCACTGTGCCAGGCCTGGAATTGTT	1	45715514	45715544	GTGAGCCACTGTGCCTGGCCNNNNNNNN
chr19	chr19	105	chr19	ATGAGCCACTGTGCCTGGCCGGGAGCACTT	1	35158834	35158864	GTGAGCCACTGTGCCTGGCCNNNNNNNN
chr17	chr17	105	chr17	ATGAGCCACTGCACCTGGCCTGGATTGTAT	3	1523938	1523968	GTGAGCCACTGTGCCTGGCCNNNNNNNN
chr17	chr17	105	chr17	ATGAGCCACTGTGCCTGGCTGGGCCCTTGA	2	14076354	14076384	GTGAGCCACTGTGCCTGGCCNNNNNNNN
chr16	chr16	105	chr16	GTGAGCCACTGTGCCCAGCCAGGTTCATTC	2	68112555	68112585	GTGAGCCACTGTGCCTGGCCNNNNNNNN
chr16	chr16	105	chr16	GTGAGCCACTGCGCCTGGCCAGGGACTTGG	1	53829169	53829199	GTGAGCCACTGTGCCTGGCCNNNNNNNN
chr16	chr16	105	chr16	GTGAGCCACTGTGCCTGGCCTGGCCTAATA	0	11866484	11866514	GTGAGCCACTGTGCCTGGCCNNNNNNNN
chr15	chr15	105	chr15	ATGAGCCACTGAGCCTGGCCTGGTTTAGTT	2	85139996	85140026	GTGAGCCACTGTGCCTGGCCNNNNNNNN
chr14	chr14	105	chr14	GTGAGCCACCGTGCCTGGCCGGGAAGCTAA	1	58165207	58165237	GTGAGCCACTGTGCCTGGCCNNNNNNNN
chr13	chr13	105	chr13	GTGGGCCACCATGCCTGGCCAGGCTTGATA	3	94750176	94750206	GTGAGCCACTGTGCCTGGCCNNNNNNNN
chr12	chr12	105	chr12	GTGAACCACCGTGCCTGGCCTGGTGTGTTA	2	50944355	50944385	GTGAGCCACTGTGCCTGGCCNNNNNNNN
chr12	chr12	105	chr12	GTGAGCCACTGCGCCTGGCCCGGAAGAGCC	1	48870306	48870336	GTGAGCCACTGTGCCTGGCCNNNNNNNN
chr12	chr12	105	chr12	GTGAGCCACTGCACCTGGCCAGGCTCTCTT	2	12228078	12228108	GTGAGCCACTGTGCCTGGCCNNNNNNNN
chr12	chr12	105	chr12	ATGAGCCATTGTGCCTGGCCAGGGGTGCAT	2	117833648	117833678	GTGAGCCACTGTGCCTGGCCNNNNNNNN
chr1	chr1	105	chr1	ATGAGCCACTGCGCCTGGCCAGGCACCTCC	2	202072872	202072902	GTGAGCCACTGTGCCTGGCCNNNNNNNN
chr1	chr1	105	chr1	GTGAGCCACCATGCCTGGCCTGGTACAGCA	2	199720096	199720126	GTGAGCCACTGTGCCTGGCCNNNNNNNN
chr1	chr1	105	chr1	GTGAGCCACCGCGCCTGGCCGGGAAGATAT	2	18624084	18624114	GTGAGCCACTGTGCCTGGCCNNNNNNNN
chr11	chr11	105	chr11	ATGAGCCACTGCGCCTGGCCTGGATGTCAG	2	73877593	73877623	GTGAGCCACTGTGCCTGGCCNNNNNNNN
chr1	chr1	105	chr1	GTGAGCCACTGTGCCTGGCTGGGATGAGTC	1	147802827	147802857	GTGAGCCACTGTGCCTGGCCNNNNNNNN
chr11	chr11	105	chr11	GTGAGCCACCGTGCCTGGCCTGGTTTAATA	1	25856311	25856341	GTGAGCCACTGTGCCTGGCCNNNNNNNN
chr10	chr10	105	chr10	ATGAGCCACCATGCCTGGCCAGGAATCAAT	3	44639844	44639874	GTGAGCCACTGTGCCTGGCCNNNNNNNN
chr10	chr10	105	chr10	ATGAGCCACAGTGCCTGGCCAGGATCTATT	2	15885047	15885077	GTGAGCCACTGTGCCTGGCCNNNNNNNN
chr9	chr9	104	chr9	GTGAGTCACTGCGCCTGGCCAGGAGCTTTG	2	71892240	71892270	GTGAGCCACTGTGCCTGGCCNNNNNNNN
chr9	chr9	104	chr9	GTGAGCCACTGTGCCTGGCCTGGAAGTTAA	0	100220704	100220734	GTGAGCCACTGTGCCTGGCCNNNNNNNN
chr8	chr8	104	chr8	ATGAGCCACTGCACCTGGCCTGGACAGGGA	3	42477750	42477780	GTGAGCCACTGTGCCTGGCCNNNNNNNN
chr8	chr8	104	chr8	ATGAGCCACTGTGCCTGTCCTGGAACCAAC	2	133644524	133644554	GTGAGCCACTGTGCCTGGCCNNNNNNNN
chr7	chr7	104	chr7	GTGAGCCACCGTGCCTGGCCTGGACTCATT	1	129128128	129128158	GTGAGCCACTGTGCCTGGCCNNNNNNNN
chr7	chr7	104	chr7	GTGAGCCACTGTGCCTGGCCAGGAACTAAC	0	1186803	1186833	GTGAGCCACTGTGCCTGGCCNNNNNNNN
chr7	chr7	104	chr7	GTGAGCCACCATGCCTGGCCTGGAGCCACT	2	101390704	101390734	GTGAGCCACTGTGCCTGGCCNNNNNNNN
chr6	chr6	104	chr6	ATGAGTCACTGTGCCTGGCCAGGAGGCTCT	2	56267464	56267494	GTGAGCCACTGTGCCTGGCCNNNNNNNN
chr6	chr6	104	chr6	GTGAGCCACTGCGCCTGGCCTGGAGCTGCC	1	134121207	134121237	GTGAGCCACTGTGCCTGGCCNNNNNNNN
chr5	chr5	104	chr5	ATGAGCCACTGTGCCTGGCCGGGAGATTCA	1	56002134	56002164	GTGAGCCACTGTGCCTGGCCNNNNNNNN
chr5	chr5	104	chr5	GTGAGCCACTGTGCCCGGCCAGGTCTGTTT	1	40796024	40796054	GTGAGCCACTGTGCCTGGCCNNNNNNNN
chr5	chr5	104	chr5	GTGAGCCACTGCGCCTGGCCGGGAAAACAT	1	133027861	133027891	GTGAGCCACTGTGCCTGGCCNNNNNNNN
chr4	chr4	104	chr4	ATGAGCCACTGCACCTGGCCAGGACTCGAT	3	154251798	154251828	GTGAGCCACTGTGCCTGGCCNNNNNNNN
chr3	chr3	104	chr3	GTGAGCCACCATGCCTGGCCTGGAGATAGG	2	185958125	185958155	GTGAGCCACTGTGCCTGGCCNNNNNNNN
chr2	chr2	104	chr2	GTGAGCCACCGTGCCTGGCCAGGACTCCTC	1	241656940	241656970	GTGAGCCACTGTGCCTGGCCNNNNNNNN
chr2	chr2	104	chr2	ATGAGCCACCGCACCTGGCCTGGATTGCCA	4	100837592	100837622	GTGAGCCACTGTGCCTGGCCNNNNNNNN
chr20	chr20	104	chr20	ATGAGCCACTGTGTCTGGCCAGGTGTGACT	2	38814076	38814106	GTGAGCCACTGTGCCTGGCCNNNNNNNN
chr19	chr19	104	chr19	GTGAGCCACTGCGCCTGGCCAGGGATTACA	1	49467300	49467330	GTGAGCCACTGTGCCTGGCCNNNNNNNN
chr17	chr17	104	chr17	GTGAGCCACTGTGCCTGGACTGGTATTATT	1	62329415	62329445	GTGAGCCACTGTGCCTGGCCNNNNNNNN
chr17	chr17	104	chr17	GTGAGCCACTGTGCCTGGCCTGGTATTATA	0	48669916	48669946	GTGAGCCACTGTGCCTGGCCNNNNNNNN
chr17	chr17	104	chr17	GTGACCCACTGCGCCTGGCCAGGATCCTAT	2	15954258	15954288	GTGAGCCACTGTGCCTGGCCNNNNNNNN
chr17	chr17	104	chr17	GTGAGCCACCATGCCTGGCCTGGACTTCTT	2	15074938	15074968	GTGAGCCACTGTGCCTGGCCNNNNNNNN
chr16	chr16	104	chr16	GTGAGCCACTGTCCCTGGCCTGGGAAACTT	1	68045997	68046027	GTGAGCCACTGTGCCTGGCCNNNNNNNN
chr1	chr1	104	chr1	GTGAGCCACCGTGCCTGGCCAGGAATGGGT	1	5925894	5925924	GTGAGCCACTGTGCCTGGCCNNNNNNNN
chr15	chr15	104	chr15	ATGAGCCACTGCACCTGGCCAGGAGGCAGT	3	71452894	71452924	GTGAGCCACTGTGCCTGGCCNNNNNNNN
chr14	chr14	104	chr14	ATGAGCCACTGCGCCTGGCCTGGTGTGGGG	2	91940812	91940842	GTGAGCCACTGTGCCTGGCCNNNNNNNN
chr14	chr14	104	chr14	GTGAGCCACTGTGCCCAGCCTGGCCTTCAT	2	22931064	22931094	GTGAGCCACTGTGCCTGGCCNNNNNNNN
chr12	chr12	104	chr12	ATGAGCCACTGTGCCTGGCCTGGAATGTGC	1	56302913	56302943	GTGAGCCACTGTGCCTGGCCNNNNNNNN
chr1	chr1	104	chr1	GTGAGCCACCGTGCCCGGCCCGGCAGGTGC	2	236487416	236487446	GTGAGCCACTGTGCCTGGCCNNNNNNNN
chr1	chr1	104	chr1	GTGAGCCACTGTGCCTGGCCAGGAATGTTT	0	184583118	184583148	GTGAGCCACTGTGCCTGGCCNNNNNNNN
chr11	chr11	104	chr11	ATGAGCCACTGCGCCTGACCAGGCTTCTAC	3	76401152	76401182	GTGAGCCACTGTGCCTGGCCNNNNNNNN
chr1	chr1	104	chr1	GTGAGCCACTGTGCCCGGCCAGGTCATATT	1	161276074	161276104	GTGAGCCACTGTGCCTGGCCNNNNNNNN
chr1	chr1	104	chr1	ATGAGCCACTGCACCTGGCCTGGACAATTA	3	152964122	152964152	GTGAGCCACTGTGCCTGGCCNNNNNNNN
chr1	chr1	104	chr1	GTGAGCCACTGTGCCTGGCCAAGCATGATT	0	114629558	114629588	GTGAGCCACTGTGCCTGGCCNNNNNNNN
chr10	chr10	104	chr10	ATGAGCCACTGTGCCCAGCCTGGCATGACA	3	35120220	35120250	GTGAGCCACTGTGCCTGGCCNNNNNNNN
chr10	chr10	104	chr10	GTGAGCCACTGTGCCTGGCCAAGGCTTCGT	0	15132146	15132176	GTGAGCCACTGTGCCTGGCCNNNNNNNN
chr10	chr10	104	chr10	GTGAGCCACCATGCCTGGCCCGGCATCTCA	2	13494126	13494156	GTGAGCCACTGTGCCTGGCCNNNNNNNN
chr10	chr10	104	chr10	GTGAGCCACTGAGCCTGGCCTGGGCACTTT	1	122077902	122077932	GTGAGCCACTGTGCCTGGCCNNNNNNNN
chrX	chrX	103	chrX	ATGAGCCACTGTGCCTGGCCTGGAATTTCC	1	69595089	69595119	GTGAGCCACTGTGCCTGGCCNNNNNNNN
chr9	chr9	103	chr9	GTGAGCCGCTGTGCCTGGCCAGGGTATTGT	1	120478479	120478509	GTGAGCCACTGTGCCTGGCCNNNNNNNN
chr7	chr7	103	chr7	GTGAGCCACTGTGCCCGGCCAGGCTTCCCA	1	73537595	73537625	GTGAGCCACTGTGCCTGGCCNNNNNNNN
chr7	chr7	103	chr7	ATGAGCCACCATGCCTGGCCTGGTTATTTG	3	71077422	71077452	GTGAGCCACTGTGCCTGGCCNNNNNNNN
chr7	chr7	103	chr7	GTGAGCCACCATGCCTGGCCTGGAGCTTTT	2	43375602	43375632	GTGAGCCACTGTGCCTGGCCNNNNNNNN
chr7	chr7	103	chr7	ATGAGCCACCGTGCCTGGCCGGGACACAAT	2	39512839	39512869	GTGAGCCACTGTGCCTGGCCNNNNNNNN
chr7	chr7	103	chr7	GTGAGCCACCATGCCTGGCCTGGTCATAAT	2	26287964	26287994	GTGAGCCACTGTGCCTGGCCNNNNNNNN
chr7	chr7	103	chr7	GTGAGTCACTGTGCCTGGCCAGGAATCATT	1	103797384	103797414	GTGAGCCACTGTGCCTGGCCNNNNNNNN
chr6	chr6	103	chr6	GTGGGCCACTGCGCCTGGCCTGGTTGGTTT	2	7149968	7149998	GTGAGCCACTGTGCCTGGCCNNNNNNNN
chr6	chr6	103	chr6	ATGAGCCACCGTGCCTGGCCAGGGCTACTT	2	38950718	38950748	GTGAGCCACTGTGCCTGGCCNNNNNNNN
chr6	chr6	103	chr6	GTGAGCCACTGTGCCTGGCCTGGGGGCACA	0	17209649	17209679	GTGAGCCACTGTGCCTGGCCNNNNNNNN
chr6	chr6	103	chr6	GTGAGCCACTGCGCCTGGCCAGGGGAAACA	1	162362836	162362866	GTGAGCCACTGTGCCTGGCCNNNNNNNN
chr6	chr6	103	chr6	GTGAGCCACCATGCCTGGCCAGGAAGTGTT	2	141032033	141032063	GTGAGCCACTGTGCCTGGCCNNNNNNNN
chr6	chr6	103	chr6	ATGAGCCACCGTGCCTGGCCTGGTTTTGTA	2	108502484	108502514	GTGAGCCACTGTGCCTGGCCNNNNNNNN
chr4	chr4	103	chr4	ATGAGCCACAGTGCCTGGCCTGGTAACCTT	2	70884148	70884178	GTGAGCCACTGTGCCTGGCCNNNNNNNN
chr3	chr3	103	chr3	ATGAGCCACCGTGCCTGGCCGAGTCAATCT	2	45058279	45058309	GTGAGCCACTGTGCCTGGCCNNNNNNNN
chr3	chr3	103	chr3	ATGAGCCACCATGCCTGGCCAGGCCTGAAT	3	133666744	133666774	GTGAGCCACTGTGCCTGGCCNNNNNNNN
chr2	chr2	103	chr2	ATGAGCCACTGCGCCTGGCCAGGAGTTTAT	2	24472361	24472391	GTGAGCCACTGTGCCTGGCCNNNNNNNN
chr22	chr22	103	chr22	GTGAGCCACTGTGCCTGGCCGAGAACTAGT	0	23351964	23351994	GTGAGCCACTGTGCCTGGCCNNNNNNNN
chr17	chr17	103	chr17	GTGAGCCACTGTGCCTGGCAAGGATGAGTC	1	62373320	62373350	GTGAGCCACTGTGCCTGGCCNNNNNNNN
chr17	chr17	103	chr17	GTGAGCCACCGTGCCTGGCCTGGATTCCAT	1	17324154	17324184	GTGAGCCACTGTGCCTGGCCNNNNNNNN
chr16	chr16	103	chr16	GTGAGCCACCATGCCTGGCCTGGCAGGCTG	2	80710206	80710236	GTGAGCCACTGTGCCTGGCCNNNNNNNN
chr16	chr16	103	chr16	GTGAGCCACTGCGCCTAGCCAGGAGTATTT	2	78100530	78100560	GTGAGCCACTGTGCCTGGCCNNNNNNNN
chr15	chr15	103	chr15	GTGAGCCATTGTGCCTGGCCTGGGTGCTTC	1	52608170	52608200	GTGAGCCACTGTGCCTGGCCNNNNNNNN
chr14	chr14	103	chr14	GTGAGCCACTGTGCCGGGCCTGGAAAGCAT	1	74330154	74330184	GTGAGCCACTGTGCCTGGCCNNNNNNNN
chr13	chr13	103	chr13	GTGAGCCACCATGCCTGGCCGGGAGTTATT	2	19892992	19893022	GTGAGCCACTGTGCCTGGCCNNNNNNNN
chr12	chr12	103	chr12	GTGAGCCACTGCACCTGGCCTGGATGCATT	2	53889583	53889613	GTGAGCCACTGTGCCTGGCCNNNNNNNN
chr1	chr1	103	chr1	GTGAGCCACTGTGCCCAGCCAGGCTGTTCT	2	205180744	205180774	GTGAGCCACTGTGCCTGGCCNNNNNNNN
chr1	chr1	103	chr1	ATGAGCCACTGTGCCCAGCCTGGAAAGCAG	3	180149254	180149284	GTGAGCCACTGTGCCTGGCCNNNNNNNN
chr11	chr11	103	chr11	GTGAGCCACTGCGCCTGGCCTGGCATAACT	1	125661055	125661085	GTGAGCCACTGTGCCTGGCCNNNNNNNN
chr9	chr9	102	chr9	ATGAGCCACTGCACCTGGCCGGGAACTTTC	3	112791688	112791718	GTGAGCCACTGTGCCTGGCCNNNNNNNN
chr6	chr6	102	chr6	ATGAGCCACTGTGCCTGACCAGGTGAACTA	2	31553318	31553348	GTGAGCCACTGTGCCTGGCCNNNNNNNN
chr6	chr6	102	chr6	ATGAGCCACTGTGCCCGGCCAGGGACATGA	2	133979926	133979956	GTGAGCCACTGTGCCTGGCCNNNNNNNN
chr5	chr5	102	chr5	GTGAGCCACCGTGCCTGGCCTGGAGACCGT	1	112229696	112229726	GTGAGCCACTGTGCCTGGCCNNNNNNNN
chr4	chr4	102	chr4	TTGAGCCACTGTGCCTGGCCTGGTTAACAC	1	174234875	174234905	GTGAGCCACTGTGCCTGGCCNNNNNNNN
chr4	chr4	102	chr4	GTGAGCCATTGTGCCTGGCCAGGAATTCCT	1	146831378	146831408	GTGAGCCACTGTGCCTGGCCNNNNNNNN
chr3	chr3	102	chr3	GTGAGCCACTGTGCCTGGCCTGGCATTGGC	0	195913805	195913835	GTGAGCCACTGTGCCTGGCCNNNNNNNN
chr3	chr3	102	chr3	GTGAGCCACTGTGCCTGGCCAGGATTTTAA	0	124657861	124657891	GTGAGCCACTGTGCCTGGCCNNNNNNNN
chr2	chr2	102	chr2	GTGAGCCACTATGCCTGGCCAGGCCACATT	1	70178314	70178344	GTGAGCCACTGTGCCTGGCCNNNNNNNN
chr22	chr22	102	chr22	GTGAGCCACCGCGCCTGGCCCGGGATTAAG	2	19293916	19293946	GTGAGCCACTGTGCCTGGCCNNNNNNNN
chr2	chr2	102	chr2	GTGAGCCACAGTGCCTGGCCGGGTTGCTAG	1	180703502	180703532	GTGAGCCACTGTGCCTGGCCNNNNNNNN
chr19	chr19	102	chr19	ATGAGCCACTGTGCCTGGCCTGGGTTTCGC	1	8040779	8040809	GTGAGCCACTGTGCCTGGCCNNNNNNNN
chr19	chr19	102	chr19	GTGAGCCACCGTGCCTGGCCCGGGCTTGGA	1	47049663	47049693	GTGAGCCACTGTGCCTGGCCNNNNNNNN
chr19	chr19	102	chr19	GTGAGCCACTGTGCCTGGTCAGGTTTTGTT	1	38744856	38744886	GTGAGCCACTGTGCCTGGCCNNNNNNNN
chr19	chr19	102	chr19	GTGAGCCACCGTGCCTGGCCTGGGAACAAT	1	2315695	2315725	GTGAGCCACTGTGCCTGGCCNNNNNNNN
chr17	chr17	102	chr17	ATGAGCCACCATGCCTGGCCTGGTTTTGTT	3	46825731	46825761	GTGAGCCACTGTGCCTGGCCNNNNNNNN
chr17	chr17	102	chr17	ATGAGCCACTGTGCCTGGCCGGGAAATGAC	1	32306131	32306161	GTGAGCCACTGTGCCTGGCCNNNNNNNN
chr16	chr16	102	chr16	ATGAGCCACTGCGCCTGGCCAGGTTTTGTT	2	73082891	73082921	GTGAGCCACTGTGCCTGGCCNNNNNNNN
chr15	chr15	102	chr15	ATGAGCCACTGTGCCTGGCCAGGAAAGTTT	1	85575701	85575731	GTGAGCCACTGTGCCTGGCCNNNNNNNN
chr14_GL000194v1_random	chr14_GL000194v1_random	102	chr14_GL000194v1_random	GTGAGCCACTGTGCCTGGCCTGGAATTTTT	0	93386	93416	GTGAGCCACTGTGCCTGGCCNNNNNNNN
chr1	chr1	102	chr1	ATGAGACACCGTGCCTGGCCAGGAGCGACA	3	45732067	45732097	GTGAGCCACTGTGCCTGGCCNNNNNNNN
chr14	chr14	102	chr14	GTGAGCCACTGCACCTGGCCAGGTATTTAT	2	48487802	48487832	GTGAGCCACTGTGCCTGGCCNNNNNNNN
chr1	chr1	102	chr1	GTGAGCCACCGTGCCCGGCCAGGTTCAAAT	2	231063070	231063100	GTGAGCCACTGTGCCTGGCCNNNNNNNN
chr1	chr1	102	chr1	GTGAGCCACCATGCCCGGCCGGGTTCCATA	3	225397753	225397783	GTGAGCCACTGTGCCTGGCCNNNNNNNN
chr1	chr1	102	chr1	ATGAGCCACTGCACCTGGCCAGGATTTGTT	3	187655792	187655822	GTGAGCCACTGTGCCTGGCCNNNNNNNN
chr11	chr11	102	chr11	GTGAGCCACCGCGCCTGGCCAGGAACACTT	2	65974743	65974773	GTGAGCCACTGTGCCTGGCCNNNNNNNN
chr11	chr11	102	chr11	GTGAGCCACTGTGCCTGGCCTGGCTTCCAG	0	61310961	61310991	GTGAGCCACTGTGCCTGGCCNNNNNNNN
chr1	chr1	102	chr1	GTGAGCCACTGTGCCTGGCCCAGAACACAT	0	145783142	145783172	GTGAGCCACTGTGCCTGGCCNNNNNNNN
chr11	chr11	102	chr11	ATGAGCCACCGTGCCTGGCCAGGTTCTTTT	2	14471625	14471655	GTGAGCCACTGTGCCTGGCCNNNNNNNN
chr11	chr11	102	chr11	GTGAGCCACTGTGCCCGGCCTGGTTGATTT	1	111953344	111953374	GTGAGCCACTGTGCCTGGCCNNNNNNNN
chr1	chr1	102	chr1	GTGAGCCACCGTGCCTGGTCCGGAATGTAT	2	109580277	109580307	GTGAGCCACTGTGCCTGGCCNNNNNNNN
chr1	chr1	102	chr1	GTGAGCCACTGCGCCTGGCCTGGCCAAGTT	1	10483594	10483624	GTGAGCCACTGTGCCTGGCCNNNNNNNN
chr10	chr10	102	chr10	GTGAGCCACTGTGCCTGGCCAGGTTGAATA	0	69525528	69525558	GTGAGCCACTGTGCCTGGCCNNNNNNNN
chr10	chr10	102	chr10	GTGAGCCACTGTGTCTGGCCAGGAAACCCC	1	12959861	12959891	GTGAGCCACTGTGCCTGGCCNNNNNNNN
chr10	chr10	102	chr10	ATGAGCCACTGTGCCTGGCCGAGTTTAAGA	1	11630601	11630631	GTGAGCCACTGTGCCTGGCCNNNNNNNN
chrX	chrX	101	chrX	GTGAGCCACTGCACCTGGCCTGGTTAGTGG	2	44991968	44991998	GTGAGCCACTGTGCCTGGCCNNNNNNNN
chrX	chrX	101	chrX	ATGAGCCACCATGCCTGGCCTGGAACATCT	3	140072486	140072516	GTGAGCCACTGTGCCTGGCCNNNNNNNN
chr9	chr9	101	chr9	ATGAGCCACTGTGCCTGGCCTGGACTGTTG	1	70365571	70365601	GTGAGCCACTGTGCCTGGCCNNNNNNNN
chr7	chr7	101	chr7	ATGAGCCACTGTGCCTGGCCTGGTGAAGGA	1	43166364	43166394	GTGAGCCACTGTGCCTGGCCNNNNNNNN
chr7	chr7	101	chr7	GTAAGCCACTGTGCCTGGCCAGGCTGTTAT	1	104970105	104970135	GTGAGCCACTGTGCCTGGCCNNNNNNNN
chr6	chr6	101	chr6	ATGAGCCACCATGCCTGGCCAGGATAAGAG	3	87784056	87784086	GTGAGCCACTGTGCCTGGCCNNNNNNNN
chr6	chr6	101	chr6	GTGAGCCACTGTGCCCAGCCAGGAAAGACA	2	70509141	70509171	GTGAGCCACTGTGCCTGGCCNNNNNNNN
chr6	chr6	101	chr6	GTGAGACACTGCGCCTGGCCTGGCCCTAAG	2	161440232	161440262	GTGAGCCACTGTGCCTGGCCNNNNNNNN
chr5	chr5	101	chr5	GTGAGCCACCATGCCTGGCCTGGATCTATT	2	180499070	180499100	GTGAGCCACTGTGCCTGGCCNNNNNNNN
chr5	chr5	101	chr5	GTGAGCCACCGTGCCTGGCCAGGAGTGATC	1	149437149	149437179	GTGAGCCACTGTGCCTGGCCNNNNNNNN
chr5	chr5	101	chr5	GTGAGCCAACATGCCTGGCCAGGTGTCACA	3	116689976	116690006	GTGAGCCACTGTGCCTGGCCNNNNNNNN
chr4	chr4	101	chr4	GTGAGCCACTGTGCCTGGCCAGGAAGATGG	0	42379418	42379448	GTGAGCCACTGTGCCTGGCCNNNNNNNN
chr3	chr3	101	chr3	GTGAGCCACCGTGCCTGGCCCGGCCTTTAG	1	136702777	136702807	GTGAGCCACTGTGCCTGGCCNNNNNNNN
chr2	chr2	101	chr2	ATGAGCCACTGTGCCTGGCCAGGCCATTAA	1	54017534	54017564	GTGAGCCACTGTGCCTGGCCNNNNNNNN
chr2	chr2	101	chr2	GTGAGCCACTGTGCCTGGCCTGGGATATAA	0	231179378	231179408	GTGAGCCACTGTGCCTGGCCNNNNNNNN
chr21	chr21	101	chr21	GTGAGCCACCGTGCCTGGCCAGGAAGGAAT	1	27885742	27885772	GTGAGCCACTGTGCCTGGCCNNNNNNNN
chr21	chr21	101	chr21	GTGAGCCACTGTGCCTGGCCTGGAAATTTT	0	15860434	15860464	GTGAGCCACTGTGCCTGGCCNNNNNNNN
chr20	chr20	101	chr20	ATGAGCCACTGTGCCTGCCCTGGATCGATC	2	32827564	32827594	GTGAGCCACTGTGCCTGGCCNNNNNNNN
chr1	chr1	101	chr1	ATGAGCCACTGTACCTGACCTGGTTTTCAT	3	92989524	92989554	GTGAGCCACTGTGCCTGGCCNNNNNNNN
chr19	chr19	101	chr19	GTGAGCCACCGTGCCTGGCCAGGACTTTGG	1	10268747	10268777	GTGAGCCACTGTGCCTGGCCNNNNNNNN
chr17	chr17	101	chr17	ATGAGCCACTGTGCCTGGCTAGGATTTCAG	2	72516189	72516219	GTGAGCCACTGTGCCTGGCCNNNNNNNN
chr17	chr17	101	chr17	GTGAGCCACTGTGTCTGGCCAGGGTTTTGG	1	40149155	40149185	GTGAGCCACTGTGCCTGGCCNNNNNNNN
chr16	chr16	101	chr16	GTGAGCCACTGCGCCTAGCCTGGTTAGCCT	2	20872825	20872855	GTGAGCCACTGTGCCTGGCCNNNNNNNN
chr15	chr15	101	chr15	GTGAGCCACTGTGCCTGGCCTGGAACTTCC	0	44532810	44532840	GTGAGCCACTGTGCCTGGCCNNNNNNNN
chr14	chr14	101	chr14	ATGAGCCACTGTGCCTGGCCAGGAGTTTCC	1	81712919	81712949	GTGAGCCACTGTGCCTGGCCNNNNNNNN
chr1	chr1	101	chr1	ATGAGCCACTGTGCCCGGCCAGGACTGCTG	2	35918835	35918865	GTGAGCCACTGTGCCTGGCCNNNNNNNN
chr1	chr1	101	chr1	ATGAGCCACTGCGCCTGGCCTGGATTTTCT	2	240327854	240327884	GTGAGCCACTGTGCCTGGCCNNNNNNNN
chr1	chr1	101	chr1	GTGAGCCACTGAGCCTGGCCTGGCCTGTAT	1	23413713	23413743	GTGAGCCACTGTGCCTGGCCNNNNNNNN
chr1	chr1	101	chr1	GTGAGCCACTGCACCTGGCCTGGTTTACTT	2	231322335	231322365	GTGAGCCACTGTGCCTGGCCNNNNNNNN
chr1	chr1	101	chr1	GTGACCCACTGCGCCTGGCCGGGCCCAGCT	2	224153628	224153658	GTGAGCCACTGTGCCTGGCCNNNNNNNN
chr12	chr12	101	chr12	GTGAGCCACTGCGCCTGGCCAGGAAGGAGG	1	1759734	1759764	GTGAGCCACTGTGCCTGGCCNNNNNNNN
chr12	chr12	101	chr12	GTGGGCCACTGCGCCTGGCCAGGCTTAGGG	2	14249779	14249809	GTGAGCCACTGTGCCTGGCCNNNNNNNN
chr1	chr1	101	chr1	ATGAGCCACTGTGCCCGGCCAGGGTTTCTA	2	205193578	205193608	GTGAGCCACTGTGCCTGGCCNNNNNNNN
chr11	chr11	101	chr11	GTGAGCCACTGTGCCTGGCTGGGACTGTGC	1	60375786	60375816	GTGAGCCACTGTGCCTGGCCNNNNNNNN
chr11	chr11	101	chr11	GTGAGCCACCATGCCTGGCCAGGCCAACTA	2	126299037	126299067	GTGAGCCACTGTGCCTGGCCNNNNNNNN
chr10	chr10	101	chr10	ATGAGTCACTGCACCTGGCCTGGCTTTGTA	4	122175234	122175264	GTGAGCCACTGTGCCTGGCCNNNNNNNN
chr10	chr10	101	chr10	ATGAGTCACTGTGCCTGGCCTGGCCTAACA	2	101052458	101052488	GTGAGCCACTGTGCCTGGCCNNNNNNNN
chrX	chrX	100	chrX	GTGAGCCATTGTGCCTGGCCAGGTGGTGTT	1	1048134	1048164	GTGAGCCACTGTGCCTGGCCNNNNNNNN
chr9	chr9	100	chr9	GTGAGCCACTGTGCCTGGCCTGGCAATTAT	0	103218195	103218225	GTGAGCCACTGTGCCTGGCCNNNNNNNN
chr8	chr8	100	chr8	GTGAGCCACTGTGCCTGGCCAGGTTTGAAA	0	94288312	94288342	GTGAGCCACTGTGCCTGGCCNNNNNNNN
chr7	chr7	100	chr7	GTGAGCCACTGTGCCCGGCCAGGCTGCTGA	1	91724152	91724182	GTGAGCCACTGTGCCTGGCCNNNNNNNN
chr7	chr7	100	chr7	GTGAGCCACTGTGCCCAGCCTGGTCTCACT	2	2293109	2293139	GTGAGCCACTGTGCCTGGCCNNNNNNNN
chr6	chr6	100	chr6	GTGAGCCACCGTGCCTGACCTGGCCTAGGG	2	73337458	73337488	GTGAGCCACTGTGCCTGGCCNNNNNNNN
chr6	chr6	100	chr6	ATGAGCCACCGTGCCTGGCCCGGTAGAAAT	2	27124121	27124151	GTGAGCCACTGTGCCTGGCCNNNNNNNN
chr6	chr6	100	chr6	ATGAGCCACCATGCCTGGCCAGGGAAATGG	3	134825032	134825062	GTGAGCCACTGTGCCTGGCCNNNNNNNN
chr6	chr6	100	chr6	GTGAGCCACTGTGCCCAGCCAGGAACTCTT	2	13155597	13155627	GTGAGCCACTGTGCCTGGCCNNNNNNNN
chr5	chr5	100	chr5	GTGAGCCACCATGCCTGGCCTGGCAGGCTT	2	6613804	6613834	GTGAGCCACTGTGCCTGGCCNNNNNNNN
chr5	chr5	100	chr5	GTGAGCCACTGTGCCTGGCCAGGAACACTT	0	55323699	55323729	GTGAGCCACTGTGCCTGGCCNNNNNNNN
chr5	chr5	100	chr5	GTGAGCCACTGTGCCTGGCCTGGTGCCTGT	0	172185981	172186011	GTGAGCCACTGTGCCTGGCCNNNNNNNN
chr5	chr5	100	chr5	GTGAGCCACTGTGCCTGGCCTGGTGTCAAA	0	132974804	132974834	GTGAGCCACTGTGCCTGGCCNNNNNNNN
chr5	chr5	100	chr5	GTGAGCCACCGTGCCTAGCCTGGAATTTTC	2	128127400	128127430	GTGAGCCACTGTGCCTGGCCNNNNNNNN
chr4	chr4	100	chr4	GTGAGCCACTATGCCTGGCCTGGGATACAA	1	11586981	11587011	GTGAGCCACTGTGCCTGGCCNNNNNNNN
chr21	chr21	100	chr21	GTGAGCCACGGTGCCTGGCCGGGTTATAGA	1	23878589	23878619	GTGAGCCACTGTGCCTGGCCNNNNNNNN
chr20	chr20	100	chr20	ATGAGCCACCATGCCTGGCCAGGCGTGAAC	3	49975178	49975208	GTGAGCCACTGTGCCTGGCCNNNNNNNN
chr20	chr20	100	chr20	GTGAGCCACCATGCCTGGCCTGGCCTGAGT	2	31509296	31509326	GTGAGCCACTGTGCCTGGCCNNNNNNNN
chr1	chr1	100	chr1	ATGAGCCACTGTGCCTGACCTGGTCCCTCT	2	9365396	9365426	GTGAGCCACTGTGCCTGGCCNNNNNNNN
chr19	chr19	100	chr19	GTGAGCCACTGTGCCTGGCCGGGTCTTTCT	0	32961278	32961308	GTGAGCCACTGTGCCTGGCCNNNNNNNN
chr17	chr17	100	chr17	GTGAGCCATCATGCCTGGCCTGGAGGCGAT	3	81255703	81255733	GTGAGCCACTGTGCCTGGCCNNNNNNNN
chr17	chr17	100	chr17	GTGAGCCACCGCGCCTGGCCTGGTTTCTTA	2	48085773	48085803	GTGAGCCACTGTGCCTGGCCNNNNNNNN
chr16	chr16	100	chr16	ATGAGCCACTGTGCCTGGCCAAGTTCTGAC	1	85009987	85010017	GTGAGCCACTGTGCCTGGCCNNNNNNNN
chr1	chr1	100	chr1	GTGAGCCACCGCGCCTGGCCTGGTTCATTG	2	64962775	64962805	GTGAGCCACTGTGCCTGGCCNNNNNNNN
chr16	chr16	100	chr16	GTGAGCCACTGCGCCTGGCCAGGAGTAAGA	1	25103080	25103110	GTGAGCCACTGTGCCTGGCCNNNNNNNN
chr14	chr14	100	chr14	ATGAGCCACCATGCCTGGCCTGGTATCAAG	3	70311945	70311975	GTGAGCCACTGTGCCTGGCCNNNNNNNN
chr12	chr12	100	chr12	ATGAGCCACTATGCCTGGCCTGGTTTGTAT	2	370100	370130	GTGAGCCACTGTGCCTGGCCNNNNNNNN
chr12	chr12	100	chr12	ATGAGCCACCGTGCCTGGCCGGGTCTGTTT	2	14582629	14582659	GTGAGCCACTGTGCCTGGCCNNNNNNNN
chr1	chr1	100	chr1	GTGAGCCACCGTGCCTAGCCTGGTGTCTCT	2	1768245	1768275	GTGAGCCACTGTGCCTGGCCNNNNNNNN
chr11	chr11	100	chr11	GTGAGGCACTGTACCTGGCCTGGATTTAGT	2	73906530	73906560	GTGAGCCACTGTGCCTGGCCNNNNNNNN
chr1	chr1	100	chr1	GTGAGCCACTGTGCCTGACCAGGTTATATA	1	111472791	111472821	GTGAGCCACTGTGCCTGGCCNNNNNNNN
chr11	chr11	100	chr11	GTGAGCCACCGTACCTGGCCAGGAGGAGAA	2	113892405	113892435	GTGAGCCACTGTGCCTGGCCNNNNNNNN
chr10	chr10	100	chr10	GTGAGCCACAGCGCCTGGCCGGGGGCTGTC	2	131965725	131965755	GTGAGCCACTGTGCCTGGCCNNNNNNNN
chrX	chrX	99	chrX	GTGAGCCACTGTGCCCAGCCTGGTTTCATT	2	24254847	24254877	GTGAGCCACTGTGCCTGGCCNNNNNNNN
chr9	chr9	99	chr9	GTGAGCCACTGTGCCTGGCCTAGGCTCTTC	0	19218065	19218095	GTGAGCCACTGTGCCTGGCCNNNNNNNN
chr9	chr9	99	chr9	ATGAGCCATTATGCCTGGCCGGGCCATCTT	3	134088998	134089028	GTGAGCCACTGTGCCTGGCCNNNNNNNN
chr9	chr9	99	chr9	GTGAGCCACCGTGCCTGGCCAGGTATTTCT	1	124823003	124823033	GTGAGCCACTGTGCCTGGCCNNNNNNNN
chr8	chr8	99	chr8	GTGAGCCACTGTGCCCGGCCTGGGGTCTCT	1	130370008	130370038	GTGAGCCACTGTGCCTGGCCNNNNNNNN
chr8	chr8	99	chr8	GTGAGCCACCATGCCTGGCCAGGGCAGAAC	2	121988893	121988923	GTGAGCCACTGTGCCTGGCCNNNNNNNN
chr7	chr7	99	chr7	GTGAGCCACCATGCCTGGCCAGGTACTTTA	2	101445120	101445150	GTGAGCCACTGTGCCTGGCCNNNNNNNN
chr6	chr6	99	chr6	GTGAGCCACTGCACCTGGCCTGGAACCTTT	2	150873950	150873980	GTGAGCCACTGTGCCTGGCCNNNNNNNN
chr6	chr6	99	chr6	ATGAGCCACTGTGCCCGGCCAGGTTTGTTT	2	148647103	148647133	GTGAGCCACTGTGCCTGGCCNNNNNNNN
chr6	chr6	99	chr6	GTGAGCCACCATGCCTGGCCTGGTATTCTA	2	126939737	126939767	GTGAGCCACTGTGCCTGGCCNNNNNNNN
chr6	chr6	99	chr6	GTGAGCCACTGTGCCTGGCCTGGATGTTGT	0	109473790	109473820	GTGAGCCACTGTGCCTGGCCNNNNNNNN
chr4	chr4	99	chr4	TTGAGCCACTGTGCCTGGCCAGGAAGTGAA	1	182432966	182432996	GTGAGCCACTGTGCCTGGCCNNNNNNNN
chr4	chr4	99	chr4	GTGAGCCACTGTGCCTAGCCGGGACTATAG	1	169614604	169614634	GTGAGCCACTGTGCCTGGCCNNNNNNNN
chr3	chr3	99	chr3	GTGAGCCACTGTGTCTGGCCAGGACTGGTA	1	88624860	88624890	GTGAGCCACTGTGCCTGGCCNNNNNNNN
chr22	chr22	99	chr22	GTGAGCCACTGCGCCTGGCCAGGATTCTTA	1	31679581	31679611	GTGAGCCACTGTGCCTGGCCNNNNNNNN
chr2	chr2	99	chr2	GTGAGCCACTGCGCCTGGCCAGGAAGAAGT	1	207744649	207744679	GTGAGCCACTGTGCCTGGCCNNNNNNNN
chr20	chr20	99	chr20	ATGAGCCACTGCGCCTGGCCTGGATAATAG	2	58588406	58588436	GTGAGCCACTGTGCCTGGCCNNNNNNNN
chr19	chr19	99	chr19	GTGAGCCACCGCGCCTGGCCAGGGTTTGTT	2	50151544	50151574	GTGAGCCACTGTGCCTGGCCNNNNNNNN
chr19	chr19	99	chr19	GTGAGCCACCGTGCCTGGCCTGGCTGTGAT	1	11462344	11462374	GTGAGCCACTGTGCCTGGCCNNNNNNNN
chr17	chr17	99	chr17	GTGAGCCACCATGCCTGGCCTGGCTAAGAG	2	67808786	67808816	GTGAGCCACTGTGCCTGGCCNNNNNNNN
chr17	chr17	99	chr17	GTGAGCCACTGTACCTGGCCTGGTAAAGCA	1	58430351	58430381	GTGAGCCACTGTGCCTGGCCNNNNNNNN
chr17	chr17	99	chr17	ATGAGCCACTATGCCTGGCCGGGATATTCT	2	47723827	47723857	GTGAGCCACTGTGCCTGGCCNNNNNNNN
chr17	chr17	99	chr17	GTGAGCCACAGTGCCTGGCCGGGATTTCTT	1	43606530	43606560	GTGAGCCACTGTGCCTGGCCNNNNNNNN
chr17	chr17	99	chr17	GTGAGCCACCATGCCTGGCCTGGCTTCCCC	2	39308041	39308071	GTGAGCCACTGTGCCTGGCCNNNNNNNN
chr16	chr16	99	chr16	GTGAGCCACTGGGCCTGGCCTGGTTGTATC	1	745707	745737	GTGAGCCACTGTGCCTGGCCNNNNNNNN
chr16	chr16	99	chr16	GTGAGCCACCGTGCCTGGCCTGGGCCCGGC	1	4255789	4255819	GTGAGCCACTGTGCCTGGCCNNNNNNNN
chr15	chr15	99	chr15	GTGAGCCACCATGCCTGGCCAGGAGCTAAA	2	75569412	75569442	GTGAGCCACTGTGCCTGGCCNNNNNNNN
chr14	chr14	99	chr14	ATGAGCCACTGAGCCTGGCCTGGAAAACCA	2	60635528	60635558	GTGAGCCACTGTGCCTGGCCNNNNNNNN
chr13	chr13	99	chr13	GTGAGCCACTGCACCTGGCCTGGGTTTTCT	2	74955764	74955794	GTGAGCCACTGTGCCTGGCCNNNNNNNN
chr13	chr13	99	chr13	ATGAGCCACCGTGCCTGGCCTGGTATCAAC	2	43419679	43419709	GTGAGCCACTGTGCCTGGCCNNNNNNNN
chr12	chr12	99	chr12	GTGAGCCACTGTGCCCAGCCCGGCCAATGT	2	73715773	73715803	GTGAGCCACTGTGCCTGGCCNNNNNNNN
chr12	chr12	99	chr12	ATGAGTCACTGTGCCTGGCCTGGTGGACAC	2	56695515	56695545	GTGAGCCACTGTGCCTGGCCNNNNNNNN
chr12	chr12	99	chr12	ATGAGCCACAGTGCCTGGCCTGGCATTGAC	2	107011898	107011928	GTGAGCCACTGTGCCTGGCCNNNNNNNN
chr11	chr11	99	chr11	GTGAGCCACTGTGCCTGGCCAGGAGCCGTT	0	65052591	65052621	GTGAGCCACTGTGCCTGGCCNNNNNNNN
chr1	chr1	99	chr1	ATGAGCCACCGTGCCTGGCCTGGTGAAATA	2	111741995	111742025	GTGAGCCACTGTGCCTGGCCNNNNNNNN
chr10	chr10	99	chr10	GTGAGCCACTGTGCCTGGCCCGGAGTTAAT	0	24676911	24676941	GTGAGCCACTGTGCCTGGCCNNNNNNNN
chr10	chr10	99	chr10	ATGAGCCACCGTGCCTGGCCTGGTTTGTCT	2	16945475	16945505	GTGAGCCACTGTGCCTGGCCNNNNNNNN
chr10	chr10	99	chr10	ATGAGCCACTGTGCCCGGCCAGGATGGTTT	2	123342548	123342578	GTGAGCCACTGTGCCTGGCCNNNNNNNN
chr10	chr10	99	chr10	GTGAGCCACCATGCCTGGCCTGGAGCTGTC	2	116354431	116354461	GTGAGCCACTGTGCCTGGCCNNNNNNNN
chr10	chr10	99	chr10	ATGAGCCACTGTATCTGGCCTGGTTGTAGT	3	110669701	110669731	GTGAGCCACTGTGCCTGGCCNNNNNNNN
chr10	chr10	99	chr10	GTGAGCCACTGTGCCTGGCCTGGTTAGGTT	0	102344759	102344789	GTGAGCCACTGTGCCTGGCCNNNNNNNN
chrX	chrX	98	chrX	GTGAGCCACTGCACCTGGCCAGGAACTACC	2	124559375	124559405	GTGAGCCACTGTGCCTGGCCNNNNNNNN
chrX	chrX	98	chrX	GTGAGCGACTGTGCCTGGCCTGGTTGTACT	1	123824281	123824311	GTGAGCCACTGTGCCTGGCCNNNNNNNN
chrX	chrX	98	chrX	ATGAGCCACTGTGCCCGGCCAGGAATATGT	2	119842291	119842321	GTGAGCCACTGTGCCTGGCCNNNNNNNN
chrX	chrX	98	chrX	ATGAGCCACAGTGCCTGGCCAGGTATAAAC	2	11005863	11005893	GTGAGCCACTGTGCCTGGCCNNNNNNNN
chr9	chr9	98	chr9	GTGAGCCACTGCGCCTGGCCAGGAGAAATC	1	93455940	93455970	GTGAGCCACTGTGCCTGGCCNNNNNNNN
chr9	chr9	98	chr9	GTGAGCCACTGTGCCTGGCCTGGTTATATA	0	91780099	91780129	GTGAGCCACTGTGCCTGGCCNNNNNNNN
chr9	chr9	98	chr9	GTGAGCAACTGTGCCTGGCCTGGAAATTTT	1	36915779	36915809	GTGAGCCACTGTGCCTGGCCNNNNNNNN
chr9	chr9	98	chr9	GTGAGCCACTGCACCTGGCCAGGAATGTAA	2	137133731	137133761	GTGAGCCACTGTGCCTGGCCNNNNNNNN
chr9	chr9	98	chr9	GTGAGCCACTGTGTCTGGCCAGGACACTTT	1	130622339	130622369	GTGAGCCACTGTGCCTGGCCNNNNNNNN
chr8	chr8	98	chr8	ATGAGCCACCGTGCCTGGCCTGGCAGTTTG	2	87027549	87027579	GTGAGCCACTGTGCCTGGCCNNNNNNNN
chr8	chr8	98	chr8	ACGAGCCACTGTGCCTGGCCAGGACATTAT	2	72920326	72920356	GTGAGCCACTGTGCCTGGCCNNNNNNNN
chr7	chr7	98	chr7	GTGAGCCACCGTGCCTGGCCTGGATTTGTC	1	139623218	139623248	GTGAGCCACTGTGCCTGGCCNNNNNNNN
chr6	chr6	98	chr6	GTGAGCCACAGTGCCTGGCCAGGTTTTGAG	1	68858212	68858242	GTGAGCCACTGTGCCTGGCCNNNNNNNN
chr6	chr6	98	chr6	ATGAGCCACTGTGCCTGGCCAGGCCTAGCA	1	30776483	30776513	GTGAGCCACTGTGCCTGGCCNNNNNNNN
chr6	chr6	98	chr6	ATGAGCCACTGTGCCCGGCCGGGACATTCT	2	149442804	149442834	GTGAGCCACTGTGCCTGGCCNNNNNNNN
chr5	chr5	98	chr5	ATGAGCCACTGCGCCTGGCCAGGTCTGTTA	2	179004397	179004427	GTGAGCCACTGTGCCTGGCCNNNNNNNN
chr4	chr4	98	chr4	ATGAGCCACCGTGCCTGGCCTGGATTTTCT	2	1977833	1977863	GTGAGCCACTGTGCCTGGCCNNNNNNNN
chr4	chr4	98	chr4	ATGAGCCACTGTGCCTGGCTGGGATCCAGT	2	155694250	155694280	GTGAGCCACTGTGCCTGGCCNNNNNNNN
chr3	chr3	98	chr3	GTGAGCCACCATGCCTGGCCAGGTCTTCTT	2	69125322	69125352	GTGAGCCACTGTGCCTGGCCNNNNNNNN
chr3	chr3	98	chr3	GTGAGCCACCATGCCTGGCCTGGCCAGAAT	2	49070714	49070744	GTGAGCCACTGTGCCTGGCCNNNNNNNN
chr22	chr22	98	chr22	ATGAGCCACTGTGCCTAGCCTGGTGTTTAC	2	43445849	43445879	GTGAGCCACTGTGCCTGGCCNNNNNNNN
chr2	chr2	98	chr2	GTGAGCCACCGTGCCTGGCCTAGAATTTGT	1	241488679	241488709	GTGAGCCACTGTGCCTGGCCNNNNNNNN
chr22	chr22	98	chr22	GTGAGCCAACGTGCCTGGCCAGGGTTGTTT	2	29624487	29624517	GTGAGCCACTGTGCCTGGCCNNNNNNNN
chr22	chr22	98	chr22	GTGAGCCACTGTGCCTGGCCAGGTGTATAT	0	17977731	17977761	GTGAGCCACTGTGCCTGGCCNNNNNNNN
chr2	chr2	98	chr2	GTGAGCCACAGTGCCTGGCCTGGAAGACTC	1	199859170	199859200	GTGAGCCACTGTGCCTGGCCNNNNNNNN
chr2	chr2	98	chr2	GTGAGCCACTGTGCCTGACCAGGTAACTAT	1	191542292	191542322	GTGAGCCACTGTGCCTGGCCNNNNNNNN
chr2	chr2	98	chr2	ATGAGCCACCATGCCTGGCCTGGTAATGCC	3	156756519	156756549	GTGAGCCACTGTGCCTGGCCNNNNNNNN
chr2	chr2	98	chr2	GTGAGCCACCGTGCCTGGCCTGGAACGTCT	1	128117828	128117858	GTGAGCCACTGTGCCTGGCCNNNNNNNN
chr20	chr20	98	chr20	GTGAGCCACCATGCCTGGCCAGGACCTGTT	2	53293725	53293755	GTGAGCCACTGTGCCTGGCCNNNNNNNN
chr20	chr20	98	chr20	GTGAGCCACTGTGCCTGGCCTGGTTTATTC	0	51626764	51626794	GTGAGCCACTGTGCCTGGCCNNNNNNNN
chr20	chr20	98	chr20	GTGAGCCACTGCGCCTGGCCTGGACTTAGA	1	3274422	3274452	GTGAGCCACTGTGCCTGGCCNNNNNNNN
chr19	chr19	98	chr19	GTGAGTCACCGTGCCTGGCCTGGACTTTTC	2	13190501	13190531	GTGAGCCACTGTGCCTGGCCNNNNNNNN
chr18	chr18	98	chr18	ATGAGCCACTGTGCCTGGCCTGGGGTATCC	1	25307909	25307939	GTGAGCCACTGTGCCTGGCCNNNNNNNN
chr16	chr16	98	chr16	ATGAGCCACCGTGCCTGGCCTGGCCCATTC	2	84018498	84018528	GTGAGCCACTGTGCCTGGCCNNNNNNNN
chr1	chr1	98	chr1	ATGAGCCACTGTGCCCAGCCTGGTTTTGTA	3	67507330	67507360	GTGAGCCACTGTGCCTGGCCNNNNNNNN
chr16	chr16	98	chr16	ATGAGCCACCGTGCCTGGCCAGGAATTTAT	2	72699195	72699225	GTGAGCCACTGTGCCTGGCCNNNNNNNN
chr15	chr15	98	chr15	ATGAGCCACCATGCCTGGCCAGGAAGTGTC	3	80554116	80554146	GTGAGCCACTGTGCCTGGCCNNNNNNNN
chr15	chr15	98	chr15	GTGAGCCACCATGCCTGGCCTGGATTAATA	2	44342546	44342576	GTGAGCCACTGTGCCTGGCCNNNNNNNN
chr14	chr14	98	chr14	GTGAGCCACTGCACCTGGCCTGGTTTTTTT	2	78954744	78954774	GTGAGCCACTGTGCCTGGCCNNNNNNNN
chr14	chr14	98	chr14	ATGAGCCACCGTGCCTGGCCAGGGAAGACT	2	76910054	76910084	GTGAGCCACTGTGCCTGGCCNNNNNNNN
chr1	chr1	98	chr1	GTGAGCCACTGCGCCTGGCCTGGTATATAG	1	242601609	242601639	GTGAGCCACTGTGCCTGGCCNNNNNNNN
chr12	chr12	98	chr12	GTGAGCCACTGTACCTGGCCGGGCCTCTGG	1	4214583	4214613	GTGAGCCACTGTGCCTGGCCNNNNNNNN
chr1	chr1	98	chr1	GTGAGCCACCGTGCCTGGCCGAGAGCAAGC	1	2211864	2211894	GTGAGCCACTGTGCCTGGCCNNNNNNNN
chr12	chr12	98	chr12	GTGAGCCACTGCGCCTGGCCTGGTTTCCAA	1	130125181	130125211	GTGAGCCACTGTGCCTGGCCNNNNNNNN
chr1	chr1	98	chr1	ATGAGCCACTGCACCTGGCCAGGGTTCCAC	3	171647233	171647263	GTGAGCCACTGTGCCTGGCCNNNNNNNN
chr11	chr11	98	chr11	GTGAGCCACTGTGCCCGGCCTGGACTTATC	1	63795706	63795736	GTGAGCCACTGTGCCTGGCCNNNNNNNN
chr1	chr1	98	chr1	GTGAGCCACTGTGCCTGGCCGGGGGATTAC	0	119258090	119258120	GTGAGCCACTGTGCCTGGCCNNNNNNNN
chr11	chr11	98	chr11	GTGAGCCACTGTGCCTGGCCAGGAAACTTT	0	14373482	14373512	GTGAGCCACTGTGCCTGGCCNNNNNNNN
chr11	chr11	98	chr11	GTGACCCACTGTGCCTGGCCAGGTTTTATT	1	117162971	117163001	GTGAGCCACTGTGCCTGGCCNNNNNNNN
chr10	chr10	98	chr10	GTGAGCCACTGCGCCTGGCCTGGCCCTACC	1	73764232	73764262	GTGAGCCACTGTGCCTGGCCNNNNNNNN
chr10	chr10	98	chr10	GTGAGCCACTGCGCCTGGCCTGGAAAGATT	1	5825825	5825855	GTGAGCCACTGTGCCTGGCCNNNNNNNN
chr10	chr10	98	chr10	GTGAGCCACTGCACCTAGCCAGGAGCTCTG	3	22516065	22516095	GTGAGCCACTGTGCCTGGCCNNNNNNNN
chr10	chr10	98	chr10	ATGAGCCACTGTGCCTGGCCTGGGAGTCAT	1	128002973	128003003	GTGAGCCACTGTGCCTGGCCNNNNNNNN
chrX	chrX	97	chrX	GTGAGCCACTGTGCCTGGCCGAGGTTTGAC	0	71165813	71165843	GTGAGCCACTGTGCCTGGCCNNNNNNNN
chrX	chrX	97	chrX	GTGAGCCACTGCGCCCGGCCGGGTTTAGAC	2	123795180	123795210	GTGAGCCACTGTGCCTGGCCNNNNNNNN
chr9	chr9	97	chr9	ATGAGCCACTGTGCCTGGCCAGGTATTACA	1	121041223	121041253	GTGAGCCACTGTGCCTGGCCNNNNNNNN
chr7	chr7	97	chr7	GTGAGCCACCGTGCCTGGCCTGGCTGAGCA	1	64311942	64311972	GTGAGCCACTGTGCCTGGCCNNNNNNNN
chr7	chr7	97	chr7	ATGAGCCACTGTGCCCAGCCTGGTACGTTA	3	143260312	143260342	GTGAGCCACTGTGCCTGGCCNNNNNNNN
chr7	chr7	97	chr7	ATGAGCCACTGCGCCTGGCCAGGGCACCAT	2	102223083	102223113	GTGAGCCACTGTGCCTGGCCNNNNNNNN
chr6	chr6	97	chr6	GTGAGTCACTGTGCCTGGCCAGGAACTACT	1	83416596	83416626	GTGAGCCACTGTGCCTGGCCNNNNNNNN
chr6	chr6	97	chr6	GTGAGCCACCATGCCTGGCCAGGAGTTATT	2	43295523	43295553	GTGAGCCACTGTGCCTGGCCNNNNNNNN
chr6	chr6	97	chr6	ATGAACCACTGTGCCTGGCCAGGCTTATTC	2	158747266	158747296	GTGAGCCACTGTGCCTGGCCNNNNNNNN
chr6	chr6	97	chr6	ATGAGCCACTGTGCCTGGCCAAGGGAGGAA	1	156757661	156757691	GTGAGCCACTGTGCCTGGCCNNNNNNNN
chr5	chr5	97	chr5	GTGAGCCACTGTGCCTGGCCGGGTTGCTGG	0	136264870	136264900	GTGAGCCACTGTGCCTGGCCNNNNNNNN
chr5	chr5	97	chr5	GTGAGCCACCATGCCTGGCCAGGTTGGAGT	2	104876463	104876493	GTGAGCCACTGTGCCTGGCCNNNNNNNN
chr4	chr4	97	chr4	ATGAGCCACTGAGCCTGGCCGGGATGTGAT	2	41195868	41195898	GTGAGCCACTGTGCCTGGCCNNNNNNNN
chr3	chr3	97	chr3	GTGAGCCACTGCGCCTGGCCTGGAGAGAAT	1	49190946	49190976	GTGAGCCACTGTGCCTGGCCNNNNNNNN
chr3	chr3	97	chr3	ATGAGCCATTGTGCCTGGCCTGGTAGAATT	2	129372566	129372596	GTGAGCCACTGTGCCTGGCCNNNNNNNN
chr2	chr2	97	chr2	GTGAGCCACCGTGCCTGGCCAGGTGTGAGT	1	51312022	51312052	GTGAGCCACTGTGCCTGGCCNNNNNNNN
chr2	chr2	97	chr2	GTGAGCCACTGTGCCTGGCCAAGGCAGCCA	0	28100157	28100187	GTGAGCCACTGTGCCTGGCCNNNNNNNN
chr2	chr2	97	chr2	ATGAGCCACTGCACCTGGCCAGGGACAGCA	3	234367790	234367820	GTGAGCCACTGTGCCTGGCCNNNNNNNN
chr2	chr2	97	chr2	GTGAGCCACTGTGCCCGGCCGGGTGTAATT	1	222710237	222710267	GTGAGCCACTGTGCCTGGCCNNNNNNNN
chr21	chr21	97	chr21	GTGAGCCACTGCGCCTGGCCTGGTGTGCTT	1	22606369	22606399	GTGAGCCACTGTGCCTGGCCNNNNNNNN
chr21	chr21	97	chr21	GTGAGCCACCGTGCCTGGCCAGGGTAATGT	1	19261946	19261976	GTGAGCCACTGTGCCTGGCCNNNNNNNN
chr19	chr19	97	chr19	GTGAGCCACTGTGCCTGGCCCGGCCTCTGC	0	46665066	46665096	GTGAGCCACTGTGCCTGGCCNNNNNNNN
chr19	chr19	97	chr19	GTGAACCACTGTGCCTGGCCTGGGAGGAGC	1	12290410	12290440	GTGAGCCACTGTGCCTGGCCNNNNNNNN
chr18	chr18	97	chr18	ATGAGCCACTGCGCCTGGCCTGGATTTATT	2	46227088	46227118	GTGAGCCACTGTGCCTGGCCNNNNNNNN
chr17	chr17	97	chr17	GTGAGCCACTGCACCTGGCCTGGACTCAAC	2	68802200	68802230	GTGAGCCACTGTGCCTGGCCNNNNNNNN
chr17	chr17	97	chr17	ATGAGCCACTGTGCCTGGCCTGGTCTTGAA	1	68355634	68355664	GTGAGCCACTGTGCCTGGCCNNNNNNNN
chr17	chr17	97	chr17	GTGAGCCACTGTGCCCGGCCAGGAACTGAA	1	21209474	21209504	GTGAGCCACTGTGCCTGGCCNNNNNNNN
chr14	chr14	97	chr14	GTGAGCCACCATGCCTGGCCAGGATGATGA	2	92682873	92682903	GTGAGCCACTGTGCCTGGCCNNNNNNNN
chr14	chr14	97	chr14	ATGAGCCACTGTGCCTGGCCTGGAACTAAT	1	89881727	89881757	GTGAGCCACTGTGCCTGGCCNNNNNNNN
chr14	chr14	97	chr14	GTGAGCCACTGTGCCCAGCCAGGTTTACTT	2	61601173	61601203	GTGAGCCACTGTGCCTGGCCNNNNNNNN
chr1	chr1	97	chr1	GTGAGCCACCGTGCCTGGCCAGGGATCTTT	1	40842135	40842165	GTGAGCCACTGTGCCTGGCCNNNNNNNN
chr1	chr1	97	chr1	GTGAGCCACTGCACCTGGCCAGGGTAGCTA	2	212902676	212902706	GTGAGCCACTGTGCCTGGCCNNNNNNNN
chr12	chr12	97	chr12	ATGAGCCAATGTGCCTGGCCAGGCATAGTC	2	11994285	11994315	GTGAGCCACTGTGCCTGGCCNNNNNNNN
chr1	chr1	97	chr1	ATGAGTCACTGCGCCTGGCCTGGTGGTCTG	3	187231151	187231181	GTGAGCCACTGTGCCTGGCCNNNNNNNN
chr11	chr11	97	chr11	GTGAGCCACCATGCCTGGCCAGGGTAGGAA	2	79217995	79218025	GTGAGCCACTGTGCCTGGCCNNNNNNNN
chr11	chr11	97	chr11	CTGAGCCACTGTGCCTGGCCAGGATGTTGT	1	62445561	62445591	GTGAGCCACTGTGCCTGGCCNNNNNNNN
chr11	chr11	97	chr11	GTGAGCCACTGTGCCCAGCCAGGAGGTTAT	2	130067215	130067245	GTGAGCCACTGTGCCTGGCCNNNNNNNN
chr11	chr11	97	chr11	ATGAGCCACTGTGCCTGGCCTGGGAATGAG	1	112184532	112184562	GTGAGCCACTGTGCCTGGCCNNNNNNNN
chr10	chr10	97	chr10	GTGAGCCACTGTGCCTGGCCTGGAATTTAT	0	78246313	78246343	GTGAGCCACTGTGCCTGGCCNNNNNNNN
chr10	chr10	97	chr10	ATGAGCCACCGTGCCTGGCCAGGTAAGGTT	2	63038153	63038183	GTGAGCCACTGTGCCTGGCCNNNNNNNN
chr10	chr10	97	chr10	GTGAGCCACTGTGCCTGGACTGGTTTTTCT	1	112760598	112760628	GTGAGCCACTGTGCCTGGCCNNNNNNNN
chrX	chrX	96	chrX	ATGAGCCACCGTGCCTGGCCTGGGGTCCCC	2	444927	444957	GTGAGCCACTGTGCCTGGCCNNNNNNNN
chrX	chrX	96	chrX	ATGAGCCACCGTGCCTGGCCAGGATGAAGG	2	42037339	42037369	GTGAGCCACTGTGCCTGGCCNNNNNNNN
chr9	chr9	96	chr9	GTGAGCCACCATGCCTGGCCTGGAGATTTT	2	80996125	80996155	GTGAGCCACTGTGCCTGGCCNNNNNNNN
chr9	chr9	96	chr9	ATGAGCCACTGCACCTGGCCTGGAGACTCA	3	134498191	134498221	GTGAGCCACTGTGCCTGGCCNNNNNNNN
chr9	chr9	96	chr9	GTGAGCCACTGTGCCTGGCAGGGTCTACAT	1	114696597	114696627	GTGAGCCACTGTGCCTGGCCNNNNNNNN
chr8	chr8	96	chr8	ATGAGCCACCATGCCTGGCCAGGATAAGGC	3	64414677	64414707	GTGAGCCACTGTGCCTGGCCNNNNNNNN
chr7	chr7	96	chr7	ATGAGCCACTGTGCCTGGCCTGGAAAAAGC	1	117274856	117274886	GTGAGCCACTGTGCCTGGCCNNNNNNNN
chr6	chr6	96	chr6	ATGAGCCACCATGCCTGGCCAGGACATGTG	3	73516322	73516352	GTGAGCCACTGTGCCTGGCCNNNNNNNN
chr6	chr6	96	chr6	ATGAGCCACCGTGCCTGGCCAGGGCTCTCA	2	138018264	138018294	GTGAGCCACTGTGCCTGGCCNNNNNNNN
chr5	chr5	96	chr5	GTGAGCCACTGTGCCTGGCCAGGCAAGAGA	0	164726464	164726494	GTGAGCCACTGTGCCTGGCCNNNNNNNN
chr5	chr5	96	chr5	GTGAGCCATTGTGCCTGGCCAGGTTATCTT	1	157573453	157573483	GTGAGCCACTGTGCCTGGCCNNNNNNNN
chr5	chr5	96	chr5	GTGAGCCACCGTGCCTGGCCTGGACTTTAC	1	156347076	156347106	GTGAGCCACTGTGCCTGGCCNNNNNNNN
chr4	chr4	96	chr4	GTGAGCCACTGCGCCTGGCCAGGATCATCT	1	6975490	6975520	GTGAGCCACTGTGCCTGGCCNNNNNNNN
chr4	chr4	96	chr4	ATGAGCCACTGTGCCTGGCCAGGAATTCCT	1	157125641	157125671	GTGAGCCACTGTGCCTGGCCNNNNNNNN
chr3	chr3	96	chr3	GTGAGCCACCGCGCCTGGCCAGGATGCCCA	2	9946115	9946145	GTGAGCCACTGTGCCTGGCCNNNNNNNN
chr3	chr3	96	chr3	GTGAGCCACTGTGCCTGACCTGGAATTAAT	1	81653171	81653201	GTGAGCCACTGTGCCTGGCCNNNNNNNN
chr3	chr3	96	chr3	ATGAGCCACTGCGCCTGGCCAGGCTGTTAT	2	56774609	56774639	GTGAGCCACTGTGCCTGGCCNNNNNNNN
chr3	chr3	96	chr3	ATGAGCCACTGTACCTGGCCAGGGATGGTT	2	152577133	152577163	GTGAGCCACTGTGCCTGGCCNNNNNNNN
chr2	chr2	96	chr2	ATGAACCACTGTGCCTGGCCAGGAGCATGT	2	76024216	76024246	GTGAGCCACTGTGCCTGGCCNNNNNNNN
chr2	chr2	96	chr2	ATGAGCCACCATGCCTGGCCAGGCCTGTTA	3	30464989	30465019	GTGAGCCACTGTGCCTGGCCNNNNNNNN
chr2	chr2	96	chr2	GTGAGCCACTGTGTCTGGCCAGGCTTATAC	1	195540562	195540592	GTGAGCCACTGTGCCTGGCCNNNNNNNN
chr2	chr2	96	chr2	ATGAGTCACTGTGCCTGGCCTGGAACTTCT	2	151344365	151344395	GTGAGCCACTGTGCCTGGCCNNNNNNNN
chr2	chr2	96	chr2	GTGAGCCACCGTACCTGGCCTGGACTTTGG	2	148640277	148640307	GTGAGCCACTGTGCCTGGCCNNNNNNNN
chr21	chr21	96	chr21	GTGAGCCACTGCGCCTGGCCTGGTAATTCT	1	42870495	42870525	GTGAGCCACTGTGCCTGGCCNNNNNNNN
chr2	chr2	96	chr2	ATGAGCCACTGTGCCTGGCCTGGTTCCTCA	1	106079566	106079596	GTGAGCCACTGTGCCTGGCCNNNNNNNN
chr19	chr19	96	chr19	GTGAGCCACTGCGCCTGGCCGGGTTTATGT	1	7795179	7795209	GTGAGCCACTGTGCCTGGCCNNNNNNNN
chr19	chr19	96	chr19	ATGAGCCACTGCGCCTGGCCAGGCTCAGCT	2	5317179	5317209	GTGAGCCACTGTGCCTGGCCNNNNNNNN
chr19	chr19	96	chr19	ATGAGCCACTGTGCCTGGCCTGGGAGGCAG	1	50240644	50240674	GTGAGCCACTGTGCCTGGCCNNNNNNNN
chr19	chr19	96	chr19	GTGAGCCACCGTGCCTGGCCTGGCTGGCTA	1	16317156	16317186	GTGAGCCACTGTGCCTGGCCNNNNNNNN
chr17	chr17	96	chr17	ATGAGTCACTGTGTCTGGCCTGGATACGTG	3	77581707	77581737	GTGAGCCACTGTGCCTGGCCNNNNNNNN
chr17	chr17	96	chr17	GTGAGCCACCGCGCCTGGCCTGGATGTGGA	2	5258508	5258538	GTGAGCCACTGTGCCTGGCCNNNNNNNN
chr16	chr16	96	chr16	GTGAGCCACTGCACCTGGCCAGGCAGTGAT	2	74263333	74263363	GTGAGCCACTGTGCCTGGCCNNNNNNNN
chr16	chr16	96	chr16	GTGAGCCACCATGCCTGGCCAGGGTTATCT	2	52874786	52874816	GTGAGCCACTGTGCCTGGCCNNNNNNNN
chr16	chr16	96	chr16	GTGAGCCACCGTGCCTGACCTGGCTTCTGC	2	27071733	27071763	GTGAGCCACTGTGCCTGGCCNNNNNNNN
chr14	chr14	96	chr14	GTGAGCCACTGTGCCCAGCCAGGGTTAAAA	2	34938788	34938818	GTGAGCCACTGTGCCTGGCCNNNNNNNN
chr14	chr14	96	chr14	GTGAGCCTCTGTGCCTGGCCTGGATTATTT	1	23557515	23557545	GTGAGCCACTGTGCCTGGCCNNNNNNNN
chr13	chr13	96	chr13	GTGAGCCACTGTGCCCAGCCAGGACCCCTT	2	84736917	84736947	GTGAGCCACTGTGCCTGGCCNNNNNNNN
chr1	chr1	96	chr1	ATGAGCCACCGTGCCTGGCCTGGAGTAGAA	2	37936846	37936876	GTGAGCCACTGTGCCTGGCCNNNNNNNN
chr13	chr13	96	chr13	ATGAGCCACTGCACCTGGCCTGGGAGAGGG	3	50602138	50602168	GTGAGCCACTGTGCCTGGCCNNNNNNNN
chr12	chr12	96	chr12	ATGAGCCACCATGCCTGGCCAGGATCAGCA	3	7025689	7025719	GTGAGCCACTGTGCCTGGCCNNNNNNNN
chr12	chr12	96	chr12	GTGAGCCACCGCGCCTGGCCTGGAGACTCC	2	55733345	55733375	GTGAGCCACTGTGCCTGGCCNNNNNNNN
chr11	chr11	96	chr11	GTGAGCCACCATGCCTGGCCAGGACTTTAG	2	46749108	46749138	GTGAGCCACTGTGCCTGGCCNNNNNNNN
chr10	chr10	96	chr10	ATGAGCCACCGTGCCTGGCCTGGGATCGTT	2	43368927	43368957	GTGAGCCACTGTGCCTGGCCNNNNNNNN
chr10	chr10	96	chr10	GTGAGCCACTGTGCCTGGCCTGGGCTAATT	0	12238727	12238757	GTGAGCCACTGTGCCTGGCCNNNNNNNN
chrX	chrX	95	chrX	GTGAGCCACTGTACCTGACCTGGGCTTTGT	2	3658567	3658597	GTGAGCCACTGTGCCTGGCCNNNNNNNN
chrX	chrX	95	chrX	GTGAGCCACTGTGCCTGGCCTGGTTTTAAG	0	153372044	153372074	GTGAGCCACTGTGCCTGGCCNNNNNNNN
chr9	chr9	95	chr9	GTGAGCCACTGTGCCCAGCCGGGTTATTTG	2	85866820	85866850	GTGAGCCACTGTGCCTGGCCNNNNNNNN
chr9	chr9	95	chr9	GTGAGCCACTGTGCCTGGCCTGGATTAGGC	0	36187308	36187338	GTGAGCCACTGTGCCTGGCCNNNNNNNN
chr8	chr8	95	chr8	GTGAGCCACTGTGCCTGGCCAGGATGTGTA	0	79795559	79795589	GTGAGCCACTGTGCCTGGCCNNNNNNNN
chr8	chr8	95	chr8	ATGAGCCACTGTGCCTGGCCTGGGTCCTTT	1	53745102	53745132	GTGAGCCACTGTGCCTGGCCNNNNNNNN
chr8	chr8	95	chr8	ATGAGCCACTGTTCCTGGCCAGGACTCCAT	2	116650909	116650939	GTGAGCCACTGTGCCTGGCCNNNNNNNN
chr7	chr7	95	chr7	GTGAGCCACTGTGCCTGGCTAGGGCTCTTA	1	120590296	120590326	GTGAGCCACTGTGCCTGGCCNNNNNNNN
chr6	chr6	95	chr6	GTGAGCCACTGCGCCTAGCCTGGCTGCATG	2	53174339	53174369	GTGAGCCACTGTGCCTGGCCNNNNNNNN
chr6	chr6	95	chr6	GTGAGCCACTGTGCCTGGCCTGGCCTGTGT	0	44414357	44414387	GTGAGCCACTGTGCCTGGCCNNNNNNNN
chr5	chr5	95	chr5	GTGAGCCACTGTGCCTGGCCAGGATTTTGT	0	61344174	61344204	GTGAGCCACTGTGCCTGGCCNNNNNNNN
chr5	chr5	95	chr5	GTGAGCCACTGCGCCTGGCCAGGAAAATTT	1	178552987	178553017	GTGAGCCACTGTGCCTGGCCNNNNNNNN
chr5	chr5	95	chr5	GTGAGCCACTGTGCCTGGTCAGGCCTTAGG	1	145763785	145763815	GTGAGCCACTGTGCCTGGCCNNNNNNNN
chr4	chr4	95	chr4	ATGAGCCACTGTGCCTGGCCTGGCATTTTT	1	172921503	172921533	GTGAGCCACTGTGCCTGGCCNNNNNNNN
chr3	chr3	95	chr3	GTGAGCCACCATGCCTGGCCAGGGGTAACA	2	87396681	87396711	GTGAGCCACTGTGCCTGGCCNNNNNNNN
chr3	chr3	95	chr3	GTGAGCCACTGTGCCTGGCCAGGCTCTCTT	0	194545664	194545694	GTGAGCCACTGTGCCTGGCCNNNNNNNN
chr3	chr3	95	chr3	ATGAGCCACAGTGCCTGGCCAGGAAGAGGA	2	119423335	119423365	GTGAGCCACTGTGCCTGGCCNNNNNNNN
chr2	chr2	95	chr2	ATGAGCCACTGCACCTGGCCAGGATCTATT	3	77285449	77285479	GTGAGCCACTGTGCCTGGCCNNNNNNNN
chr2	chr2	95	chr2	GTGAGCTACTGTGCCTGGCCAGGATACACT	1	62025973	62026003	GTGAGCCACTGTGCCTGGCCNNNNNNNN
chr2	chr2	95	chr2	GTGAGCCATTGTGCCTGGCCAGGTCCTGGG	1	153499130	153499160	GTGAGCCACTGTGCCTGGCCNNNNNNNN
chr20	chr20	95	chr20	ATGAGCCACTGTGCCCGGCCAGGATAAATA	2	32507717	32507747	GTGAGCCACTGTGCCTGGCCNNNNNNNN
chr19	chr19	95	chr19	ATGAGCCACTGTACCTGGCCTGGATGTTTA	2	8013671	8013701	GTGAGCCACTGTGCCTGGCCNNNNNNNN
chr17	chr17	95	chr17	ATGAGCCACCATGCCTGACCAGGGTTTAGT	4	72922675	72922705	GTGAGCCACTGTGCCTGGCCNNNNNNNN
chr17	chr17	95	chr17	GTGAGCCACCATGCCTGGCCTGGAGACATT	2	2813669	2813699	GTGAGCCACTGTGCCTGGCCNNNNNNNN
chr17	chr17	95	chr17	ATGAGCCACCATGCCTGGCCAGGGTTATTC	3	10214024	10214054	GTGAGCCACTGTGCCTGGCCNNNNNNNN
chr16	chr16	95	chr16	GTGAGCCACCATGCCTGGCCTGGCCTTACC	2	54839451	54839481	GTGAGCCACTGTGCCTGGCCNNNNNNNN
chr14	chr14	95	chr14	ATGAGCCACTGTACCTGGCCTGGCAGTTTA	2	84839498	84839528	GTGAGCCACTGTGCCTGGCCNNNNNNNN
chr14	chr14	95	chr14	ATGAGCCACTGTGCCTGGCCGGGAAGCTGT	1	69002515	69002545	GTGAGCCACTGTGCCTGGCCNNNNNNNN
chr14	chr14	95	chr14	GTGAGCCACTGTGCCTGTCCCGGTTTTTGA	1	65223109	65223139	GTGAGCCACTGTGCCTGGCCNNNNNNNN
chr14	chr14	95	chr14	GTGAGCCACTGCACCTGGTCTGGGAAGCAG	3	23258893	23258923	GTGAGCCACTGTGCCTGGCCNNNNNNNN
chr13	chr13	95	chr13	GTGAACCACAGTGCCTGGCCTGGTAGAGGT	2	80231806	80231836	GTGAGCCACTGTGCCTGGCCNNNNNNNN
chr1	chr1	95	chr1	ATGAGCCACCATGCCTGGCCAGGGTCTCAC	3	36501697	36501727	GTGAGCCACTGTGCCTGGCCNNNNNNNN
chr12	chr12	95	chr12	ATGAGCCACCGTGCCTGGCCAGGTCACTCC	2	69111021	69111051	GTGAGCCACTGTGCCTGGCCNNNNNNNN
chr1	chr1	95	chr1	GTGAGCCACTGCGCCTGGCCCGGTTGATTT	1	214652314	214652344	GTGAGCCACTGTGCCTGGCCNNNNNNNN
chr1	chr1	95	chr1	GTGAGCCACTGTGCCTAGCCAGGGTTTTAT	1	206546978	206547008	GTGAGCCACTGTGCCTGGCCNNNNNNNN
chr1	chr1	95	chr1	ATGAGCCACCGCGCCTGGCCTGGAGCATGT	3	190944211	190944241	GTGAGCCACTGTGCCTGGCCNNNNNNNN
chr1	chr1	95	chr1	ATGAGCCACTGCGCCTGGCCTGGATGTTAT	2	150202509	150202539	GTGAGCCACTGTGCCTGGCCNNNNNNNN
chr11	chr11	95	chr11	GTGAGCCACCATGCCTGGCCTGGATTCAGG	2	19195976	19196006	GTGAGCCACTGTGCCTGGCCNNNNNNNN
chr11	chr11	95	chr11	GTGAGACACTGCGCCTGGCCTGGAGTTTTT	2	123007751	123007781	GTGAGCCACTGTGCCTGGCCNNNNNNNN
chr11	chr11	95	chr11	GTGAGCCACTGTGCCTGGCCAGGCCTATTT	0	121150923	121150953	GTGAGCCACTGTGCCTGGCCNNNNNNNN
chr1	chr1	95	chr1	GTGAGCCACCGTGCCTAGCCAGGTCTTGTT	2	109499632	109499662	GTGAGCCACTGTGCCTGGCCNNNNNNNN
chrX	chrX	94	chrX	GTGAGCCACTGCACCTGGCCAGGCATGTCT	2	68400881	68400911	GTGAGCCACTGTGCCTGGCCNNNNNNNN
chrX	chrX	94	chrX	ATGAGCCACTGCACCTGGCCAGGAGTTGTA	3	5751080	5751110	GTGAGCCACTGTGCCTGGCCNNNNNNNN
chrX	chrX	94	chrX	GTGAGCCACTGTGCCTGGCCCGGAAGTTGG	0	48865305	48865335	GTGAGCCACTGTGCCTGGCCNNNNNNNN
chrX	chrX	94	chrX	ATGAGCCACTGCGCCTGGCCAGGAATTTTT	2	31932453	31932483	GTGAGCCACTGTGCCTGGCCNNNNNNNN
chrX	chrX	94	chrX	GTGAACCACTGTGCCTGGCCAGGGTTGCTT	1	118731284	118731314	GTGAGCCACTGTGCCTGGCCNNNNNNNN
chr9	chr9	94	chr9	GTGAGCCACCGTGCCTGGCCAGGAGTTACA	1	98227464	98227494	GTGAGCCACTGTGCCTGGCCNNNNNNNN
chr9	chr9	94	chr9	ATGAGCCACCATGCCTGGCCGGGTTATGCT	3	19016143	19016173	GTGAGCCACTGTGCCTGGCCNNNNNNNN
chr9	chr9	94	chr9	GTGAGCCACTGTGCCCGGCCTGGATGTCAG	1	18409091	18409121	GTGAGCCACTGTGCCTGGCCNNNNNNNN
chr9	chr9	94	chr9	GTGAGCCACTGTGCCTGGCCAGGAGGGTCT	0	127827724	127827754	GTGAGCCACTGTGCCTGGCCNNNNNNNN
chr9	chr9	94	chr9	GTGAGCCACTGTGCCTGGCCAGGTTTATAT	0	122879036	122879066	GTGAGCCACTGTGCCTGGCCNNNNNNNN
chr8	chr8	94	chr8	GTGAGCCACTGTGCCTAGCCAGGTTTAGGG	1	28921042	28921072	GTGAGCCACTGTGCCTGGCCNNNNNNNN
chr7	chr7	94	chr7	GTGAGCCACCGTGCCTGGCCTGGATACACA	1	13505460	13505490	GTGAGCCACTGTGCCTGGCCNNNNNNNN
chr6	chr6	94	chr6	ATGAGCTACTGTGCCTGGCCTGGGTTTTTT	2	60700781	60700811	GTGAGCCACTGTGCCTGGCCNNNNNNNN
chr6	chr6	94	chr6	ATGAGCCACTGTGCCTGGCCCAGGTTGCCA	1	167887737	167887767	GTGAGCCACTGTGCCTGGCCNNNNNNNN
chr6	chr6	94	chr6	GTGAACCACTGTGCCCGGCCAGGTTTTTAC	2	157386214	157386244	GTGAGCCACTGTGCCTGGCCNNNNNNNN
chr6	chr6	94	chr6	ATGAGCCACTGTGCCCAGCCTGGCTGCGTT	3	150729341	150729371	GTGAGCCACTGTGCCTGGCCNNNNNNNN
chr6	chr6	94	chr6	ATGAGCCACTGTGCCCGGCCTGGCATGTAT	2	111516223	111516253	GTGAGCCACTGTGCCTGGCCNNNNNNNN
chr5	chr5	94	chr5	GTGAGCCACCATGCCTGGCCTGGAATACAT	2	69223768	69223798	GTGAGCCACTGTGCCTGGCCNNNNNNNN
chr5	chr5	94	chr5	ATGAGCCACTGCGCCTGGCCTGGAGCATGC	2	3819984	3820014	GTGAGCCACTGTGCCTGGCCNNNNNNNN
chr4	chr4	94	chr4	GTGAGCCACTGCACCTGGCCTGGGTTCAAT	2	61875893	61875923	GTGAGCCACTGTGCCTGGCCNNNNNNNN
chr3	chr3	94	chr3	ATGAGCCACCATGCCTGGCCAGGAGGACAC	3	80501551	80501581	GTGAGCCACTGTGCCTGGCCNNNNNNNN
chr3	chr3	94	chr3	GTGAGCCACCGTGCCTGGCCGGGACTATGA	1	37201284	37201314	GTGAGCCACTGTGCCTGGCCNNNNNNNN
chr3	chr3	94	chr3	GTGAGCCACCATGCCTGGCCTGGATTTTTT	2	25440480	25440510	GTGAGCCACTGTGCCTGGCCNNNNNNNN
chr2	chr2	94	chr2	GTGAGCCACTGTGCCTGGCCAGGAATAACC	0	61822138	61822168	GTGAGCCACTGTGCCTGGCCNNNNNNNN
chr22	chr22	94	chr22	ATGAGCCACTGTGCCTGACCTAGCTAATTT	2	42121545	42121575	GTGAGCCACTGTGCCTGGCCNNNNNNNN
chr2	chr2	94	chr2	GTGAGCCACTGTGCCTGGCCCAGTGGGCAT	0	232621731	232621761	GTGAGCCACTGTGCCTGGCCNNNNNNNN
chr2	chr2	94	chr2	ATGAGCTACTGTGCCTGGCCTGGCCAACAT	2	165768073	165768103	GTGAGCCACTGTGCCTGGCCNNNNNNNN
chr21	chr21	94	chr21	GTGAGCCACTGTGCCCGGCCAGGGATACTT	1	46454015	46454045	GTGAGCCACTGTGCCTGGCCNNNNNNNN
chr21	chr21	94	chr21	GTGAGCCACTGCGCCTGGCCAGGTATGAGT	1	40653804	40653834	GTGAGCCACTGTGCCTGGCCNNNNNNNN
chr20	chr20	94	chr20	ATGAGCCACTGTGCCTGACCAGGATCCTTA	2	5643097	5643127	GTGAGCCACTGTGCCTGGCCNNNNNNNN
chr20	chr20	94	chr20	GTGAGCCACTGCGCCTGGCCTGGAATAGAT	1	44657134	44657164	GTGAGCCACTGTGCCTGGCCNNNNNNNN
chr20	chr20	94	chr20	GTGAGCCACCATGCCTGGCCAGGATCTCAA	2	41016312	41016342	GTGAGCCACTGTGCCTGGCCNNNNNNNN
chr19	chr19	94	chr19	GTGAGCCACTGTGCCTGGCCTGGATTCATT	0	2312375	2312405	GTGAGCCACTGTGCCTGGCCNNNNNNNN
chr19	chr19	94	chr19	ATGAGCCACTGTGCCCGGCCTGGAAGAAAA	2	19402337	19402367	GTGAGCCACTGTGCCTGGCCNNNNNNNN
chr19	chr19	94	chr19	GTGAGCCACTGTGCCCAGCCTGGATTATTA	2	18901888	18901918	GTGAGCCACTGTGCCTGGCCNNNNNNNN
chr18	chr18	94	chr18	GTGAGCCACCATGCCTGGCCTGGATGAACT	2	21475635	21475665	GTGAGCCACTGTGCCTGGCCNNNNNNNN
chr17	chr17	94	chr17	GTGAGCCACTGTGCCCGGCCTGGAAAAAAA	1	45358464	45358494	GTGAGCCACTGTGCCTGGCCNNNNNNNN
chr17	chr17	94	chr17	GTGAGTCACTGTGCCTGGCCTGGATGGAAC	1	43679320	43679350	GTGAGCCACTGTGCCTGGCCNNNNNNNN
chr17	chr17	94	chr17	GTGAGCCACTGTGCCTGGCCGAGGGTGTTC	0	28752741	28752771	GTGAGCCACTGTGCCTGGCCNNNNNNNN
chr16	chr16	94	chr16	ATGAGCCACTGTGCCCGGCCAGGTTTGGAA	2	73188140	73188170	GTGAGCCACTGTGCCTGGCCNNNNNNNN
chr1	chr1	94	chr1	GTGAGCCACTGTGCCCAGCCAGGTCTCCGT	2	63684983	63685013	GTGAGCCACTGTGCCTGGCCNNNNNNNN
chr15	chr15	94	chr15	ATGAGCCACTGTGCCTGGCCAAGGATTTTT	1	89265486	89265516	GTGAGCCACTGTGCCTGGCCNNNNNNNN
chr14	chr14	94	chr14	ATGAGCCACTGTGCCTGGCCTGGCATCTTG	1	105544945	105544975	GTGAGCCACTGTGCCTGGCCNNNNNNNN
chr1	chr1	94	chr1	ATGAGCCACTGTGCCTAGCCAAGACTTTTC	2	31933262	31933292	GTGAGCCACTGTGCCTGGCCNNNNNNNN
chr1	chr1	94	chr1	GTGAGCCACTGTGCCCGGCCAGGAACTCCC	1	232167941	232167971	GTGAGCCACTGTGCCTGGCCNNNNNNNN
chr1	chr1	94	chr1	GTGAGCCACTGTGCCCGGCCTGGGGCTGCT	1	228167636	228167666	GTGAGCCACTGTGCCTGGCCNNNNNNNN
chr12	chr12	94	chr12	GTGAGCCACTGCACCTGGCCAGGAATCTGT	2	22860449	22860479	GTGAGCCACTGTGCCTGGCCNNNNNNNN
chr12	chr12	94	chr12	GTGAGCCACTGTGCCCGGCCAGGATACCCT	1	116339698	116339728	GTGAGCCACTGTGCCTGGCCNNNNNNNN
chr12	chr12	94	chr12	ATGAGCCACCGTGCCTGGCCTGGGGCAATT	2	106142771	106142801	GTGAGCCACTGTGCCTGGCCNNNNNNNN
chr1	chr1	94	chr1	GTGAGCCACTGTGCCCGGCCAGGATGATTT	1	203567009	203567039	GTGAGCCACTGTGCCTGGCCNNNNNNNN
chr11	chr11	94	chr11	GTGAGCCACCGTGCCTGGCCAGGTCACAGA	1	108146789	108146819	GTGAGCCACTGTGCCTGGCCNNNNNNNN
chr11	chr11	94	chr11	GTGAGCCACTGTGCCTGGCCGGGGGTATGT	0	104900321	104900351	GTGAGCCACTGTGCCTGGCCNNNNNNNN
chr10	chr10	94	chr10	GTGAGCCACCGTGCCTGGCCAGGAACTCCT	1	74580283	74580313	GTGAGCCACTGTGCCTGGCCNNNNNNNN
chr10	chr10	94	chr10	GTGAGCCACTGCACCTGGCCCGGGAAGACT	2	30794906	30794936	GTGAGCCACTGTGCCTGGCCNNNNNNNN
chrX	chrX	93	chrX	ATGAGCCACCATGCCTGGCCAGGATGTGTG	3	98459738	98459768	GTGAGCCACTGTGCCTGGCCNNNNNNNN
chrX	chrX	93	chrX	ATGAGCCACCGTGCCTGGCCAGGGCCTTTT	2	33154104	33154134	GTGAGCCACTGTGCCTGGCCNNNNNNNN
chr9	chr9	93	chr9	ATGAGCCACCATGCCTGGCCAGGAATCTTA	3	35866789	35866819	GTGAGCCACTGTGCCTGGCCNNNNNNNN
chr9	chr9	93	chr9	ATGAGCCACCATGCCTGGCCTGGATTTCTC	3	31244040	31244070	GTGAGCCACTGTGCCTGGCCNNNNNNNN
chr9	chr9	93	chr9	ATGAGCCACAGTGCCTGGCCTGGAATTTTT	2	110648243	110648273	GTGAGCCACTGTGCCTGGCCNNNNNNNN
chr7	chr7	93	chr7	GTGAGCCACCGTGTCTGGCCAGGATGAGCA	2	39889923	39889953	GTGAGCCACTGTGCCTGGCCNNNNNNNN
chr6	chr6	93	chr6	CTGAGCCACTGTGCCTGGCCGGGAAATTTT	1	27961261	27961291	GTGAGCCACTGTGCCTGGCCNNNNNNNN
chr5	chr5	93	chr5	GTGAGCCACTGTGCCTGGCCAGGAAGTAAT	0	65668317	65668347	GTGAGCCACTGTGCCTGGCCNNNNNNNN
chr5	chr5	93	chr5	GTGAGCCACCGCGCCTGGCCAGGACTGCTT	2	172471801	172471831	GTGAGCCACTGTGCCTGGCCNNNNNNNN
chr5	chr5	93	chr5	ATGAGCCACTGCGCCTGGCCTGGATTCTTG	2	171719363	171719393	GTGAGCCACTGTGCCTGGCCNNNNNNNN
chr5	chr5	93	chr5	GTGAGCCACCATGCCTGGCCAGGTGGTGAA	2	153949835	153949865	GTGAGCCACTGTGCCTGGCCNNNNNNNN
chr5	chr5	93	chr5	GTGAGCCACCATGCCTGGCCTGGTTCTTCA	2	117371720	117371750	GTGAGCCACTGTGCCTGGCCNNNNNNNN
chr4	chr4	93	chr4	GTGAGCCACTGTGCCTGGCCGGGATATTTT	0	46566405	46566435	GTGAGCCACTGTGCCTGGCCNNNNNNNN
chr4	chr4	93	chr4	GTGAGCCACTGTGCCTGGCCGAGAGCACAT	0	166041578	166041608	GTGAGCCACTGTGCCTGGCCNNNNNNNN
chr4	chr4	93	chr4	ATGAGCCACTGTGCCTGGCCGGGAAAACGT	1	131191584	131191614	GTGAGCCACTGTGCCTGGCCNNNNNNNN
chr4	chr4	93	chr4	GTGAGCCACTGAGCCTGGCCTGGAAAACTG	1	112334140	112334170	GTGAGCCACTGTGCCTGGCCNNNNNNNN
chr3	chr3	93	chr3	ATGAGCCACTGTGCCTGGCCAGGAATGGCA	1	56393105	56393135	GTGAGCCACTGTGCCTGGCCNNNNNNNN
chr3	chr3	93	chr3	GTGAGCCACTGCACCTGGCCCGGTTTTTTC	2	43707086	43707116	GTGAGCCACTGTGCCTGGCCNNNNNNNN
chr3	chr3	93	chr3	GTGAGCCACTGTACCTGGCCGGGACTCACT	1	159668077	159668107	GTGAGCCACTGTGCCTGGCCNNNNNNNN
chr2	chr2	93	chr2	GTGAGCCACTGTGCCTGGCCAGGAGAATTG	0	32912539	32912569	GTGAGCCACTGTGCCTGGCCNNNNNNNN
chr22	chr22	93	chr22	GTGAGCCACCGTGCCTGGCCGAGGCTGGGT	1	41413138	41413168	GTGAGCCACTGTGCCTGGCCNNNNNNNN
chr22	chr22	93	chr22	GTGAGCCACCGTGCCTGGCCAGGGACTGAC	1	40969021	40969051	GTGAGCCACTGTGCCTGGCCNNNNNNNN
chr22	chr22	93	chr22	ATGAGCCACTGCGCCTGGCCTGGATCTTGG	2	24354988	24355018	GTGAGCCACTGTGCCTGGCCNNNNNNNN
chr21	chr21	93	chr21	GTGAGCCACCGTGCCTGGCCTGGTTACCAG	1	9028388	9028418	GTGAGCCACTGTGCCTGGCCNNNNNNNN
chr21	chr21	93	chr21	ATGAGCCACTGTGCCTGGCCCAGCCATAGA	1	44472798	44472828	GTGAGCCACTGTGCCTGGCCNNNNNNNN
chr20	chr20	93	chr20	GTGAGCCACCGTGCCTGGCCTGGTTCTCCT	1	32875028	32875058	GTGAGCCACTGTGCCTGGCCNNNNNNNN
chr19	chr19	93	chr19	ATGAGCCACTGTGCCTGGCCCAGTTAGACG	1	18712225	18712255	GTGAGCCACTGTGCCTGGCCNNNNNNNN
chr18	chr18	93	chr18	GTGAGCCACTGTGCCTGGCCAAGGAGAGGG	0	46893834	46893864	GTGAGCCACTGTGCCTGGCCNNNNNNNN
chr17	chr17	93	chr17	GTGAGCCACTGCGCCTGGCCAGGCTAACCT	1	9172167	9172197	GTGAGCCACTGTGCCTGGCCNNNNNNNN
chr17	chr17	93	chr17	GTGAGCCACCGCGCCTGGCCAGGTCTTGCT	2	31936280	31936310	GTGAGCCACTGTGCCTGGCCNNNNNNNN
chr16	chr16	93	chr16	GTGAGCCACCGTGCCTGGCCTGGATTTTCT	1	89019431	89019461	GTGAGCCACTGTGCCTGGCCNNNNNNNN
chr16	chr16	93	chr16	ATGAGCCACCGTGCCTGGCCAGGAATTTGC	2	87498097	87498127	GTGAGCCACTGTGCCTGGCCNNNNNNNN
chr16	chr16	93	chr16	GTGAGCCACCATGCCTGGCCGGGCTCTGCT	2	75588688	75588718	GTGAGCCACTGTGCCTGGCCNNNNNNNN
chr1	chr1	93	chr1	GTGAGCCACCGTGCCTGGCCTGGGCAGTGT	1	66146463	66146493	GTGAGCCACTGTGCCTGGCCNNNNNNNN
chr1	chr1	93	chr1	ATGAGCCACCGCGCCTGGCCAGGAATCACC	3	63064974	63065004	GTGAGCCACTGTGCCTGGCCNNNNNNNN
chr14	chr14	93	chr14	GTGAGCCACTGCGCCTGGCCAGGGATTTTT	1	50271848	50271878	GTGAGCCACTGTGCCTGGCCNNNNNNNN
chr14	chr14	93	chr14	ATGAGCCACCGTGCCTGGCCGAGTATACTA	2	45093503	45093533	GTGAGCCACTGTGCCTGGCCNNNNNNNN
chr14	chr14	93	chr14	ATGAGCCACTGTTCCTGGCCTGGGCACATA	2	35305808	35305838	GTGAGCCACTGTGCCTGGCCNNNNNNNN
chr12	chr12	93	chr12	GTGAGCCACTGCGCCTAGCCAGGACAAGAT	2	23816477	23816507	GTGAGCCACTGTGCCTGGCCNNNNNNNN
chr12	chr12	93	chr12	GTGAGCCACTGTACCTGGCCTGGCTGTATG	1	119346104	119346134	GTGAGCCACTGTGCCTGGCCNNNNNNNN
chr12	chr12	93	chr12	GTGAGCCACTGTGCCTAGCCAGGTATTTTA	1	109005017	109005047	GTGAGCCACTGTGCCTGGCCNNNNNNNN
chr1	chr1	93	chr1	GTGAGCCACAGTGCCTGGCCAGGTTTCTAG	1	19873096	19873126	GTGAGCCACTGTGCCTGGCCNNNNNNNN
chr11	chr11	93	chr11	GTGAGCCACTGTACCTGGCCTGGTTTTGCT	1	69710144	69710174	GTGAGCCACTGTGCCTGGCCNNNNNNNN
chr1	chr1	93	chr1	GTGAGCCACCGTGCCTGGCCAGGGGACTGA	1	15035555	15035585	GTGAGCCACTGTGCCTGGCCNNNNNNNN
chr11	chr11	93	chr11	GTGAGCCACTGTGCCTGGCAAGGTTGGGCT	1	33914460	33914490	GTGAGCCACTGTGCCTGGCCNNNNNNNN
chr1	chr1	93	chr1	ATAAGCCACTGTGCCTGGCCAGGTTTCTGA	2	117866562	117866592	GTGAGCCACTGTGCCTGGCCNNNNNNNN
chr10	chr10	93	chr10	ATGAGCCACTGTACCTGGCCCAGTTGAGTA	2	20470438	20470468	GTGAGCCACTGTGCCTGGCCNNNNNNNN
chr10	chr10	93	chr10	GTGAGCCACTGTGCCCAGCCAGGAATCTCC	2	114263294	114263324	GTGAGCCACTGTGCCTGGCCNNNNNNNN
chrX	chrX	92	chrX	GTGAGCCACTGTGCCCAGCCAGGAATAAAC	2	46823040	46823070	GTGAGCCACTGTGCCTGGCCNNNNNNNN
chrX	chrX	92	chrX	GTGAGCCACTGTGCCCAGCCTGGTTCTCTT	2	107617448	107617478	GTGAGCCACTGTGCCTGGCCNNNNNNNN
chr9	chr9	92	chr9	GTGAGCCACTGTGCCTGGCCCGGTTTAATA	0	88339805	88339835	GTGAGCCACTGTGCCTGGCCNNNNNNNN
chr9	chr9	92	chr9	GTGAACCACCGTGCCTGGCCGGGAGACAAC	2	85367649	85367679	GTGAGCCACTGTGCCTGGCCNNNNNNNN
chr7	chr7	92	chr7	GTGAGCCACCATGCCTGGCCGGGGGTTGCT	2	51264378	51264408	GTGAGCCACTGTGCCTGGCCNNNNNNNN
chr7	chr7	92	chr7	GTGAGCCACCATGCCTGGCCAGGGAAGCTC	2	22649097	22649127	GTGAGCCACTGTGCCTGGCCNNNNNNNN
chr6	chr6	92	chr6	ATGAGCCACTGTGCCTGGCCAGGGCTGCAG	1	43296184	43296214	GTGAGCCACTGTGCCTGGCCNNNNNNNN
chr6	chr6	92	chr6	GTGAGCCACTGTGCCCGGCCTGGGTTCATT	1	14228258	14228288	GTGAGCCACTGTGCCTGGCCNNNNNNNN
chr5	chr5	92	chr5	GTGAGCCACCGTGCCTGGCCGGGGTTTGAC	1	172952818	172952848	GTGAGCCACTGTGCCTGGCCNNNNNNNN
chr5	chr5	92	chr5	GTGAGCCACTGCGCCTGGCCTGGACAAGGA	1	116921064	116921094	GTGAGCCACTGTGCCTGGCCNNNNNNNN
chr4	chr4	92	chr4	GTGAGCCACTGCACCTGGCCAGGCTCTGTA	2	17560976	17561006	GTGAGCCACTGTGCCTGGCCNNNNNNNN
chr3	chr3	92	chr3	ATGAGCCACCATGCCTGGCCTGGATAGTAA	3	58054974	58055004	GTGAGCCACTGTGCCTGGCCNNNNNNNN
chr3	chr3	92	chr3	GTGAGCTACTGTGCCTGGCCTGGAAACTTT	1	57993535	57993565	GTGAGCCACTGTGCCTGGCCNNNNNNNN
chr3	chr3	92	chr3	ATGAGCCACTGTGCCTGGCCAGGTTTTCTT	1	57977451	57977481	GTGAGCCACTGTGCCTGGCCNNNNNNNN
chr3	chr3	92	chr3	ATGAGCCACTGCGCCTGGCCTGGTTCTTAC	2	141912540	141912570	GTGAGCCACTGTGCCTGGCCNNNNNNNN
chr3	chr3	92	chr3	GTGAGCCACCGTGCCTGGCCAGGCTGAGTT	1	117689259	117689289	GTGAGCCACTGTGCCTGGCCNNNNNNNN
chr2	chr2	92	chr2	ATGAGCCACTGTGCCGGGCCTGGCTTTCTC	2	9960146	9960176	GTGAGCCACTGTGCCTGGCCNNNNNNNN
chr2	chr2	92	chr2	ATGAGCCACCATGCCTGGCCTGGTTCCATA	3	63317187	63317217	GTGAGCCACTGTGCCTGGCCNNNNNNNN
chr2	chr2	92	chr2	ATGAGCCACTGGGCCTGGCCTGGCAATTAA	2	33817081	33817111	GTGAGCCACTGTGCCTGGCCNNNNNNNN
chr2	chr2	92	chr2	ATGAGCCACTGTGCCTGGCTGGGGTTTTCT	2	237868323	237868353	GTGAGCCACTGTGCCTGGCCNNNNNNNN
chr22	chr22	92	chr22	ATGAGCCACTGTGCCCGGCCTGGTCTATAA	2	30061610	30061640	GTGAGCCACTGTGCCTGGCCNNNNNNNN
chr22	chr22	92	chr22	GTGAGCCACTGTGCCTGGCCTGAGCTAATA	0	26550982	26551012	GTGAGCCACTGTGCCTGGCCNNNNNNNN
chr2	chr2	92	chr2	GTGAGCCACTGCGCCTGGCCAGGTTTCAGT	1	159056594	159056624	GTGAGCCACTGTGCCTGGCCNNNNNNNN
chr20	chr20	92	chr20	GTGAGGCACTGTGCCTGGCCAGGTATCCCC	1	45927112	45927142	GTGAGCCACTGTGCCTGGCCNNNNNNNN
chr1	chr1	92	chr1	ATGAGCCACCATGCCTGGCCAGGTCTCAAT	3	94381452	94381482	GTGAGCCACTGTGCCTGGCCNNNNNNNN
chr19	chr19	92	chr19	GTGAGCCACTGCGCCTGGCCCGGAGCTGAA	1	14947780	14947810	GTGAGCCACTGTGCCTGGCCNNNNNNNN
chr18	chr18	92	chr18	GTGAGCCACTGCGCCCGGCCAGGAGTCAAT	2	23364612	23364642	GTGAGCCACTGTGCCTGGCCNNNNNNNN
chr17	chr17	92	chr17	GTGAGTCACCATGCCTGGCCAGGCAGTCTT	3	76094890	76094920	GTGAGCCACTGTGCCTGGCCNNNNNNNN
chr17	chr17	92	chr17	GTGAGCCACTGTGCCTGGCTGGGGGAGCCT	1	45032492	45032522	GTGAGCCACTGTGCCTGGCCNNNNNNNN
chr17	chr17	92	chr17	GTGAGCCACTGTGCCTGGCCTGGCAATTTT	0	43506326	43506356	GTGAGCCACTGTGCCTGGCCNNNNNNNN
chr17	chr17	92	chr17	ATGAGCCACTGTGCCCAGCCTGGTGGAACA	3	17654740	17654770	GTGAGCCACTGTGCCTGGCCNNNNNNNN
chr1	chr1	92	chr1	GTGAGCCACCATGCCTGGCCAGGATTTTTT	2	66122985	66123015	GTGAGCCACTGTGCCTGGCCNNNNNNNN
chr16	chr16	92	chr16	GTGAGCCACTGTGCCTGGCCTGGTCTCAAC	0	30515104	30515134	GTGAGCCACTGTGCCTGGCCNNNNNNNN
chr16	chr16	92	chr16	ATGAGCCACTGTGCCTGGTCTGGAGATATT	2	14815835	14815865	GTGAGCCACTGTGCCTGGCCNNNNNNNN
chr1	chr1	92	chr1	ATGAACCACTGTGCCTGGCCAGGAAAGGTC	2	44737825	44737855	GTGAGCCACTGTGCCTGGCCNNNNNNNN
chr1	chr1	92	chr1	GTGAGCCACCGTGCCTGGCCTGGACTGGAT	1	36199423	36199453	GTGAGCCACTGTGCCTGGCCNNNNNNNN
chr12	chr12	92	chr12	ATGAGCCACTGTGCCCAGCCTGGCTCTTAT	3	95186477	95186507	GTGAGCCACTGTGCCTGGCCNNNNNNNN
chr1	chr1	92	chr1	ATGAGCCACTGTGCCTGGCCTGGATTTTTA	1	25951684	25951714	GTGAGCCACTGTGCCTGGCCNNNNNNNN
chr1	chr1	92	chr1	GTGAGCCACTGCGCCTGGCCTGGATGTTTA	1	23228318	23228348	GTGAGCCACTGTGCCTGGCCNNNNNNNN
chr12	chr12	92	chr12	GTGAGCCACTGCGCCTGGCCTGGGGATCAT	1	111471972	111472002	GTGAGCCACTGTGCCTGGCCNNNNNNNN
chr11	chr11	92	chr11	GTGAGCCACCGCGCCTGGCCAGGCTTGCTT	2	71073437	71073467	GTGAGCCACTGTGCCTGGCCNNNNNNNN
chr10	chr10	92	chr10	ATGAGCCACCATGCCTGGCCGGGCAGCCAC	3	13035853	13035883	GTGAGCCACTGTGCCTGGCCNNNNNNNN
chr9	chr9	91	chr9	ATGAGCCACCGTGCCTGGCCTGGAATTGGG	2	86210122	86210152	GTGAGCCACTGTGCCTGGCCNNNNNNNN
chr8	chr8	91	chr8	ATGAGCCACTGTGCCTGACCTGGACTTCTC	2	143831323	143831353	GTGAGCCACTGTGCCTGGCCNNNNNNNN
chr8	chr8	91	chr8	GTGAGCCACCGTGCCTGGCCCGGAAGACTC	1	124479004	124479034	GTGAGCCACTGTGCCTGGCCNNNNNNNN
chr7	chr7	91	chr7	GTGAGCCACTGTGCCTGGCTTGGCTTGGTT	1	66096263	66096293	GTGAGCCACTGTGCCTGGCCNNNNNNNN
chr7	chr7	91	chr7	GTGAGCCACCGCGCCTGGCCAGGAGTTATA	2	4105262	4105292	GTGAGCCACTGTGCCTGGCCNNNNNNNN
chr7	chr7	91	chr7	ATGAGCCACTGTACCTGGCCCAGATGCCAC	2	135589567	135589597	GTGAGCCACTGTGCCTGGCCNNNNNNNN
chr6	chr6	91	chr6	TTGAGCCACTGTGCCTGGCCTGGAACCAAC	1	35653068	35653098	GTGAGCCACTGTGCCTGGCCNNNNNNNN
chr5	chr5	91	chr5	ATGAGCCACTGTGCCCGGCCTGGACAAGAT	2	55892054	55892084	GTGAGCCACTGTGCCTGGCCNNNNNNNN
chr5	chr5	91	chr5	ATGAGCCACCATGCCTGGCCTGGTGCAAGC	3	169756633	169756663	GTGAGCCACTGTGCCTGGCCNNNNNNNN
chr5	chr5	91	chr5	ATGAGCCACCGTGCCTGGCCTGGAATCAAT	2	150440874	150440904	GTGAGCCACTGTGCCTGGCCNNNNNNNN
chr4	chr4	91	chr4	GTGAGCCACCATGCCTGGCCTGGTCACTAC	2	87158479	87158509	GTGAGCCACTGTGCCTGGCCNNNNNNNN
chr4	chr4	91	chr4	ATGAGCCATTGTGCCTGGCCTGGTTACTGC	2	56129981	56130011	GTGAGCCACTGTGCCTGGCCNNNNNNNN
chr3	chr3	91	chr3	GTGAGCCACCGTGCCTGGCCAGGTGCATGT	1	57337214	57337244	GTGAGCCACTGTGCCTGGCCNNNNNNNN
chr3	chr3	91	chr3	GTGAGCCACCGTGCCTGGCCAGGTAAGCTT	1	129225661	129225691	GTGAGCCACTGTGCCTGGCCNNNNNNNN
chr3	chr3	91	chr3	GTGAGCCACCATGCCTGGCCAGGAATATGT	2	10813237	10813267	GTGAGCCACTGTGCCTGGCCNNNNNNNN
chr2	chr2	91	chr2	GTGAGCCACTGTGCCTGGCAAGGAATGTCT	1	32020837	32020867	GTGAGCCACTGTGCCTGGCCNNNNNNNN
chr2	chr2	91	chr2	GTGAGCCACTGCGCCTGGCCCGGTTTTGCC	1	150497507	150497537	GTGAGCCACTGTGCCTGGCCNNNNNNNN
chr21	chr21	91	chr21	GTGAGCCACTGTGCCCGGCCAGGCAAGCAA	1	25681690	25681720	GTGAGCCACTGTGCCTGGCCNNNNNNNN
chr21	chr21	91	chr21	GTGAGCCACTGTGCCTGGCCAGGTAGTGTG	0	14744120	14744150	GTGAGCCACTGTGCCTGGCCNNNNNNNN
chr20	chr20	91	chr20	ATGAGCCACTGTACCTGGCCTGGGTTAAGT	2	44686891	44686921	GTGAGCCACTGTGCCTGGCCNNNNNNNN
chr19	chr19	91	chr19	GTGAGCCACTGTGCCTGGCCAGGATCCACA	0	40049905	40049935	GTGAGCCACTGTGCCTGGCCNNNNNNNN
chr19	chr19	91	chr19	ATGAGCCACTGCGCCTGGCCAGGAGCATGT	2	13172064	13172094	GTGAGCCACTGTGCCTGGCCNNNNNNNN
chr19	chr19	91	chr19	GTGAGCCACTGTGCCTGCCCTGGAGGGTTT	1	10525185	10525215	GTGAGCCACTGTGCCTGGCCNNNNNNNN
chr17	chr17	91	chr17	ATGAGCCACTGTGCCTGGCCTGGTTTTACA	1	80296958	80296988	GTGAGCCACTGTGCCTGGCCNNNNNNNN
chr17	chr17	91	chr17	ATGAGCCACTATGCCTGGCCTGGCCTTTTT	2	64397996	64398026	GTGAGCCACTGTGCCTGGCCNNNNNNNN
chr16	chr16	91	chr16	GTGAGCCACTGTGCCTGGCCAGGACAGGAT	0	87268630	87268660	GTGAGCCACTGTGCCTGGCCNNNNNNNN
chr16	chr16	91	chr16	ATGGGCCACTGTGCCTGGCCTGGATGTGAT	2	58751737	58751767	GTGAGCCACTGTGCCTGGCCNNNNNNNN
chr16	chr16	91	chr16	GTGAGCCACTGCACCTGGCCTGGATTTGAA	2	48429547	48429577	GTGAGCCACTGTGCCTGGCCNNNNNNNN
chr16	chr16	91	chr16	ATGAGCCACTGTGCCTGCCCAGGAACTGCC	2	25039321	25039351	GTGAGCCACTGTGCCTGGCCNNNNNNNN
chr15	chr15	91	chr15	ATGAGCCACTGTGCCTGGCCAGGGGACATT	1	96282330	96282360	GTGAGCCACTGTGCCTGGCCNNNNNNNN
chr14	chr14	91	chr14	GTGAGCCACTGTGCCCAGCCTGGACAACCA	2	60664423	60664453	GTGAGCCACTGTGCCTGGCCNNNNNNNN
chr1	chr1	91	chr1	GTGAGCCACTGTGCCTAGCCAGGGAAGTTT	1	43845262	43845292	GTGAGCCACTGTGCCTGGCCNNNNNNNN
chr14	chr14	91	chr14	GTGAGCCACTGTGCCTGACCAGGTATTTCT	1	25223006	25223036	GTGAGCCACTGTGCCTGGCCNNNNNNNN
chr13	chr13	91	chr13	ATGAGGCACTGCGCCTGGCCAGGAAAATAA	3	94740978	94741008	GTGAGCCACTGTGCCTGGCCNNNNNNNN
chr13	chr13	91	chr13	ATGAGCCACTGCGCCTGGCCTGGTCTTGAA	2	49796458	49796488	GTGAGCCACTGTGCCTGGCCNNNNNNNN
chr12	chr12	91	chr12	GTGAGCCACTGCGCCTAGCCTGGGAGTGGA	2	51276330	51276360	GTGAGCCACTGTGCCTGGCCNNNNNNNN
chr12	chr12	91	chr12	GTGAGCCACTGTGCCTGGCCAGGCAAAATA	0	100053112	100053142	GTGAGCCACTGTGCCTGGCCNNNNNNNN
chr11	chr11	91	chr11	GTGAGCCACTGTGCCTGACCTGGGTTCTTT	1	9698380	9698410	GTGAGCCACTGTGCCTGGCCNNNNNNNN
chr1	chr1	91	chr1	GTGAGCTACCGTGCCTGGCCAGGGCTAGAA	2	190457149	190457179	GTGAGCCACTGTGCCTGGCCNNNNNNNN
chr1	chr1	91	chr1	GTGAGCCACCATGCCTGGCCAGGTCCTCCA	2	182014967	182014997	GTGAGCCACTGTGCCTGGCCNNNNNNNN
chr1	chr1	91	chr1	GTGAGCCACTGCGCCTGGCCGGGGAATTTA	1	171493029	171493059	GTGAGCCACTGTGCCTGGCCNNNNNNNN
chr11	chr11	91	chr11	GTGAGCCACCGCGCCTGGCCTGGGGTCTTT	2	68459670	68459700	GTGAGCCACTGTGCCTGGCCNNNNNNNN
chr11	chr11	91	chr11	GTGAGCCACTGCGCCTGGCCAGGAATATGT	1	39654002	39654032	GTGAGCCACTGTGCCTGGCCNNNNNNNN
chr10	chr10	91	chr10	GTGAGCCACTGCACCTGGCCTGGTGTTGAT	2	21578174	21578204	GTGAGCCACTGTGCCTGGCCNNNNNNNN
chrX	chrX	90	chrX	GTGAGCCACTGTGCCCAGCCAGGATGTATG	2	39993185	39993215	GTGAGCCACTGTGCCTGGCCNNNNNNNN
chrX	chrX	90	chrX	ATGAGCCACTGTGCCCGGCCAGGTGAGATG	2	154474427	154474457	GTGAGCCACTGTGCCTGGCCNNNNNNNN
chr8	chr8	90	chr8	TTGAGCCACTGCACCTGGCCAGGAGAGGAT	3	70118967	70118997	GTGAGCCACTGTGCCTGGCCNNNNNNNN
chr8	chr8	90	chr8	ATGAGCCACTATGCCTGGCCAGGCTTCTCT	2	58441273	58441303	GTGAGCCACTGTGCCTGGCCNNNNNNNN
chr7	chr7	90	chr7	GTGAGCCACTGCACCTGGCCTGGGCCTTAT	2	92730023	92730053	GTGAGCCACTGTGCCTGGCCNNNNNNNN
chr7	chr7	90	chr7	GTGAGCCACCGTGCCTGGCCTGGTTTCTCC	1	45037697	45037727	GTGAGCCACTGTGCCTGGCCNNNNNNNN
chr7	chr7	90	chr7	GTGAGCAACTGTGCCTGGCCAGGAGGAGTA	1	16759966	16759996	GTGAGCCACTGTGCCTGGCCNNNNNNNN
chr7	chr7	90	chr7	GTGAGCCACCGCGCCTGGCCAGGAATAATC	2	111742701	111742731	GTGAGCCACTGTGCCTGGCCNNNNNNNN
chr6	chr6	90	chr6	GTGAGCCACTTTGCCTGGCCAGGAAGCAAA	1	48135180	48135210	GTGAGCCACTGTGCCTGGCCNNNNNNNN
chr6	chr6	90	chr6	GTGAGCCACCATGCCTGGCCTGGATATTCT	2	110552845	110552875	GTGAGCCACTGTGCCTGGCCNNNNNNNN
chr6	chr6	90	chr6	GTGAGCCACCGCGCCTGGCCTGGGGATAAT	2	104858408	104858438	GTGAGCCACTGTGCCTGGCCNNNNNNNN
chr4	chr4	90	chr4	GTGAGCCACTGTGCCTGGCCCGGGTTTTTA	0	103314515	103314545	GTGAGCCACTGTGCCTGGCCNNNNNNNN
chr22	chr22	90	chr22	GTGAGCCACCGTGCCTGGCCGAGACGCCAT	1	40475852	40475882	GTGAGCCACTGTGCCTGGCCNNNNNNNN
chr22	chr22	90	chr22	GTGAGCCACTGTGCCTGGCCTGGGTGGATC	0	39372748	39372778	GTGAGCCACTGTGCCTGGCCNNNNNNNN
chr20	chr20	90	chr20	ATGAGCCACCATGCCTGGCCAGGTTCCAGA	3	35555660	35555690	GTGAGCCACTGTGCCTGGCCNNNNNNNN
chr20	chr20	90	chr20	GTGAGCCACTGTGCCTGGCCAAGCAGCAAT	0	29318365	29318395	GTGAGCCACTGTGCCTGGCCNNNNNNNN
chr19	chr19	90	chr19	GTGAACCACCGCGCCTGGCCCGGTGTGGGT	3	49924969	49924999	GTGAGCCACTGTGCCTGGCCNNNNNNNN
chr19	chr19	90	chr19	GTGAGCCACTGCACCTGGCCAGGGTTTGTA	2	45840371	45840401	GTGAGCCACTGTGCCTGGCCNNNNNNNN
chr19	chr19	90	chr19	GTGAGTCACTGTACCTGGCCTGGAAGAAAA	2	16970294	16970324	GTGAGCCACTGTGCCTGGCCNNNNNNNN
chr19	chr19	90	chr19	ATGAGCCACCGCGCCTGGCCTGGCCCTGAG	3	1330418	1330448	GTGAGCCACTGTGCCTGGCCNNNNNNNN
chr18	chr18	90	chr18	ATGAGCCACTACGCCTGGCCAGGTTACTGT	3	35462976	35463006	GTGAGCCACTGTGCCTGGCCNNNNNNNN
chr17	chr17	90	chr17	ATGAGCCACCGCGCCTGGCCTGGAAGCTAT	3	79962641	79962671	GTGAGCCACTGTGCCTGGCCNNNNNNNN
chr1	chr1	90	chr1	GTGAGCCACCATGCCTGGCCCGGAAACAGT	2	7796594	7796624	GTGAGCCACTGTGCCTGGCCNNNNNNNN
chr17	chr17	90	chr17	GTGAGCCACCGTGCCTGGCCAGGATCATTG	1	65476981	65477011	GTGAGCCACTGTGCCTGGCCNNNNNNNN
chr17	chr17	90	chr17	ATGAGCCACGGTGCCTGGCCGGGATTGCTA	2	10285635	10285665	GTGAGCCACTGTGCCTGGCCNNNNNNNN
chr12	chr12	90	chr12	GTGAGCCACCGTGCCTGGCCAGGTTGCTTC	1	67416272	67416302	GTGAGCCACTGTGCCTGGCCNNNNNNNN
chr12	chr12	90	chr12	ATGAGCCACTGTGCCCGGCCTGGTTTCTTA	2	64675429	64675459	GTGAGCCACTGTGCCTGGCCNNNNNNNN
chr1	chr1	90	chr1	TTGAGCCACCGTGCCTGGCCAGGATTTAGC	2	218315735	218315765	GTGAGCCACTGTGCCTGGCCNNNNNNNN
chr11	chr11	90	chr11	GTGAGCCACTATGCCTGGCCTGGAACCTAC	1	93653005	93653035	GTGAGCCACTGTGCCTGGCCNNNNNNNN
chr1	chr1	90	chr1	GTCAGCCACTGTGCCTGGCCAGGTCTTACA	1	158342771	158342801	GTGAGCCACTGTGCCTGGCCNNNNNNNN
chr11	chr11	90	chr11	GTGAGCCACTGTGCCTGGCCAGGAACATTG	0	125510913	125510943	GTGAGCCACTGTGCCTGGCCNNNNNNNN
chr1	chr1	90	chr1	ATGAGCCACTGCGCCTGGCCGGGAACATCT	2	109369027	109369057	GTGAGCCACTGTGCCTGGCCNNNNNNNN
chr10	chr10	90	chr10	ATGAGCCACTGTGCCTGGCCTGGAATTGGT	1	68968432	68968462	GTGAGCCACTGTGCCTGGCCNNNNNNNN
chr10	chr10	90	chr10	ATGAGCCACTACGCCTGGCCAGGAAGATTT	3	32015849	32015879	GTGAGCCACTGTGCCTGGCCNNNNNNNN
chr10	chr10	90	chr10	GTGAGCCACCATGCCTGGCCTGGTATGATA	2	101390611	101390641	GTGAGCCACTGTGCCTGGCCNNNNNNNN
chrX	chrX	89	chrX	GTGAGCCACTGCGCCTGGCCTGGAACACTG	1	92810258	92810288	GTGAGCCACTGTGCCTGGCCNNNNNNNN
chrX	chrX	89	chrX	GTGAGCCACTGCACCCGGCCAGGCAAGTAT	3	130075555	130075585	GTGAGCCACTGTGCCTGGCCNNNNNNNN
chr9	chr9	89	chr9	GTGAGCCACTACGCCTGGCCAGGAGTCATT	2	125452378	125452408	GTGAGCCACTGTGCCTGGCCNNNNNNNN
chr8	chr8	89	chr8	GTGAGCCACTATGCCTGGCTGGGATTTTTA	2	99196718	99196748	GTGAGCCACTGTGCCTGGCCNNNNNNNN
chr8	chr8	89	chr8	ATGAGCCACTGTGCCTGGCCAAGTTCCAAG	1	94701724	94701754	GTGAGCCACTGTGCCTGGCCNNNNNNNN
chr8	chr8	89	chr8	GTGAGCCACCGTGCCTGGCCAGGGGCAGGC	1	79905636	79905666	GTGAGCCACTGTGCCTGGCCNNNNNNNN
chr7	chr7	89	chr7	GTGAGCCACTGTGCCTGGCCAGGGCTTACC	0	69302218	69302248	GTGAGCCACTGTGCCTGGCCNNNNNNNN
chr7	chr7	89	chr7	ATGAGCCACTGCGCCTGGCCAGGCAATTCT	2	152219249	152219279	GTGAGCCACTGTGCCTGGCCNNNNNNNN
chr7	chr7	89	chr7	GTGAGCCACCGTGCCTGGCCTGGAAGGGTA	1	133182103	133182133	GTGAGCCACTGTGCCTGGCCNNNNNNNN
chr7	chr7	89	chr7	GTGAGCCACTGTGCCTGGCCTGGATGGACT	0	101298644	101298674	GTGAGCCACTGTGCCTGGCCNNNNNNNN
chr6	chr6	89	chr6	GTGAGCCACTGCACCTGGCCAGGCTCCACT	2	43426171	43426201	GTGAGCCACTGTGCCTGGCCNNNNNNNN
chr6	chr6	89	chr6	GTGAGCCACCGTGCCTGGCCGGGAACATAT	1	41872606	41872636	GTGAGCCACTGTGCCTGGCCNNNNNNNN
chr6	chr6	89	chr6	ATGAGCCACTGTGCCTGGCTGGGCGGTTGG	2	169914887	169914917	GTGAGCCACTGTGCCTGGCCNNNNNNNN
chr6	chr6	89	chr6	GTGAGCCACCGTGCCTGGCCTGGACATTTG	1	129723655	129723685	GTGAGCCACTGTGCCTGGCCNNNNNNNN
chr6	chr6	89	chr6	GTGAGCCACTGTGCCTGGCCAAGCTCAAAT	0	121493482	121493512	GTGAGCCACTGTGCCTGGCCNNNNNNNN
chr6	chr6	89	chr6	GTGAGCCACTGCGCCTGGCCCAGCATGATT	1	109201163	109201193	GTGAGCCACTGTGCCTGGCCNNNNNNNN
chr5	chr5	89	chr5	ATGAGCCACTGCGCCTGGCCTGGTAAATTC	2	175499896	175499926	GTGAGCCACTGTGCCTGGCCNNNNNNNN
chr4	chr4	89	chr4	GTGAGCCACTGTGCCTGGCCGGGTATTCTT	0	128472165	128472195	GTGAGCCACTGTGCCTGGCCNNNNNNNN
chr3	chr3	89	chr3	GTGAGCTACTGTGCCTGGCCTGGAATATTT	1	127501071	127501101	GTGAGCCACTGTGCCTGGCCNNNNNNNN
chr3	chr3	89	chr3	GTGAGCCACTGTGCCCGGCCAGGTTTGGTC	1	118321234	118321264	GTGAGCCACTGTGCCTGGCCNNNNNNNN
chr3	chr3	89	chr3	GTGAGCCACTGCACCTGGCCAGGAGTAGCA	2	101401236	101401266	GTGAGCCACTGTGCCTGGCCNNNNNNNN
chr2	chr2	89	chr2	GTGAGCCACTGCGCCTGGCCAGGGTCTTTC	1	65585948	65585978	GTGAGCCACTGTGCCTGGCCNNNNNNNN
chr2	chr2	89	chr2	GTGAGCCACTGTGCCCGGCCTGGAACTGGT	1	44301448	44301478	GTGAGCCACTGTGCCTGGCCNNNNNNNN
chr22	chr22	89	chr22	GTGAGCCACCGCGCCTGGCCTGGGCCTTAT	2	40647337	40647367	GTGAGCCACTGTGCCTGGCCNNNNNNNN
chr22	chr22	89	chr22	ATGAGCCGCTGTGCCTGGCCAGGATTTGAA	2	40627697	40627727	GTGAGCCACTGTGCCTGGCCNNNNNNNN
chr22	chr22	89	chr22	ATGAGCCACTGTGCCTGGCTAGGTTCTATA	2	35787317	35787347	GTGAGCCACTGTGCCTGGCCNNNNNNNN
chr2	chr2	89	chr2	GTGAACCACCGTGCCTGGCCAGGGTTTTTA	2	224415299	224415329	GTGAGCCACTGTGCCTGGCCNNNNNNNN
chr2	chr2	89	chr2	ATGAGCCACTGCACCTGGCCAGGATTGATT	3	184415531	184415561	GTGAGCCACTGTGCCTGGCCNNNNNNNN
chr2	chr2	89	chr2	GTGAGACACCGTGCCTGGCCAGGAGGCATC	2	168768613	168768643	GTGAGCCACTGTGCCTGGCCNNNNNNNN
chr2	chr2	89	chr2	GTGAGCCACCGTGCCTGGCCAGGAGTGTCT	1	156491730	156491760	GTGAGCCACTGTGCCTGGCCNNNNNNNN
chr20	chr20	89	chr20	GTGAGCCACCGTGCCTGGCCAGGTAGCTTC	1	41020372	41020402	GTGAGCCACTGTGCCTGGCCNNNNNNNN
chr20	chr20	89	chr20	ATGAGCCACCGTGCCTGGCCAGGATGTACT	2	35113643	35113673	GTGAGCCACTGTGCCTGGCCNNNNNNNN
chr20	chr20	89	chr20	GTGAGCCACTGTGCCTGGCCAGGATCTCCT	0	3152615	3152645	GTGAGCCACTGTGCCTGGCCNNNNNNNN
chr19	chr19	89	chr19	GTGAGCCACCGCGCCTGGCCAGGGTGTAAT	2	1962037	1962067	GTGAGCCACTGTGCCTGGCCNNNNNNNN
chr18	chr18	89	chr18	GTGAGCCACTGCGCCTGGCCAGGATTTTCT	1	29935423	29935453	GTGAGCCACTGTGCCTGGCCNNNNNNNN
chr17	chr17	89	chr17	GTGAGCCACTGCGCCTGGCCAGGAAAGGGG	1	28856990	28857020	GTGAGCCACTGTGCCTGGCCNNNNNNNN
chr16	chr16	89	chr16	GTGAGCCACCGTGCCTGGCCTGGCTATTGC	1	14485967	14485997	GTGAGCCACTGTGCCTGGCCNNNNNNNN
chr15	chr15	89	chr15	ATGAGCCACTGTGCCCGGCCAGGACTGACT	2	85767268	85767298	GTGAGCCACTGTGCCTGGCCNNNNNNNN
chr15	chr15	89	chr15	ATAAGCCACTGTGCCCGGCCCGGATTTTTT	3	78862380	78862410	GTGAGCCACTGTGCCTGGCCNNNNNNNN
chr15	chr15	89	chr15	ATGAGCCACCGCGCCTGGCCAGGATGTGAC	3	66819994	66820024	GTGAGCCACTGTGCCTGGCCNNNNNNNN
chr1	chr1	89	chr1	ATGAGCCACAGTGCCTGGCCAGGATCCTCA	2	51379399	51379429	GTGAGCCACTGTGCCTGGCCNNNNNNNN
chr14	chr14	89	chr14	GTGAGCCACAGTGCCTGGCCAGGGCTGTCA	1	66621394	66621424	GTGAGCCACTGTGCCTGGCCNNNNNNNN
chr14	chr14	89	chr14	GTGAGCCACAGCGCCTGGCCTGGGCCAGGT	2	65406817	65406847	GTGAGCCACTGTGCCTGGCCNNNNNNNN
chr14	chr14	89	chr14	GTGAGCCACTGTGCCTGACCGGGACTCAAC	1	60627352	60627382	GTGAGCCACTGTGCCTGGCCNNNNNNNN
chr14	chr14	89	chr14	GTGAGCCACTGTGCCCAGCCTGGGGAAATA	2	50433116	50433146	GTGAGCCACTGTGCCTGGCCNNNNNNNN
chr14	chr14	89	chr14	GTGAGCCACCATGCCTGGCCAGGTGTTTTT	2	49590185	49590215	GTGAGCCACTGTGCCTGGCCNNNNNNNN
chr12	chr12	89	chr12	GTGAGCCACTGTGCCTGGCCTGGTTTTTTC	0	49095909	49095939	GTGAGCCACTGTGCCTGGCCNNNNNNNN
chr12	chr12	89	chr12	GTGAGCCACTGAGCCTGGCCAGGAAGTCCC	1	38700504	38700534	GTGAGCCACTGTGCCTGGCCNNNNNNNN
chr12	chr12	89	chr12	GTGAGCCACCATGCCTGGCCTGGAGTCTCT	2	32920187	32920217	GTGAGCCACTGTGCCTGGCCNNNNNNNN
chr12	chr12	89	chr12	GTGAGCCACTGCGCCTGGCCAGGGCTTGGT	1	32082073	32082103	GTGAGCCACTGTGCCTGGCCNNNNNNNN
chr12	chr12	89	chr12	ATGAGCCACCGTGCCTGGCCTGGCCAGTGG	2	26733039	26733069	GTGAGCCACTGTGCCTGGCCNNNNNNNN
chr12	chr12	89	chr12	GTGAGCCACTGCGCCTGGCCAGGAAAAGTG	1	101520038	101520068	GTGAGCCACTGTGCCTGGCCNNNNNNNN
chr1	chr1	89	chr1	ATGAGCCACTGCGCCTGGCCAGGAGTTGTT	2	201196624	201196654	GTGAGCCACTGTGCCTGGCCNNNNNNNN
chr11	chr11	89	chr11	ATGAGCCACTGTGCCCGGCCAGGTTAATTT	2	9870683	9870713	GTGAGCCACTGTGCCTGGCCNNNNNNNN
chr1	chr1	89	chr1	GTGAGCCACTATGCCTGACCAGGACGTCAT	2	19200430	19200460	GTGAGCCACTGTGCCTGGCCNNNNNNNN
chr1	chr1	89	chr1	GTGAGCCACTGTGCCCGGCCAGGACAGTGG	1	182337415	182337445	GTGAGCCACTGTGCCTGGCCNNNNNNNN
chr11	chr11	89	chr11	GTGAGCCACGGTGCCTGGCCAGGCCGTGTG	1	69533499	69533529	GTGAGCCACTGTGCCTGGCCNNNNNNNN
chr10	chr10	89	chr10	GTGAGCCACTGTGCCTGGCCAGGGTTGATT	0	77808802	77808832	GTGAGCCACTGTGCCTGGCCNNNNNNNN
chr10	chr10	89	chr10	GTGAGCCACTGCACCTGGCCTGGCTTTTTC	2	15144439	15144469	GTGAGCCACTGTGCCTGGCCNNNNNNNN
chr10	chr10	89	chr10	GTGAGCCACTGTGCCTGGCCGGGAAGTTCG	0	101363660	101363690	GTGAGCCACTGTGCCTGGCCNNNNNNNN
chr9	chr9	88	chr9	GTGAGCCACTGTGCCTGGCTAGGAATAAAT	1	96751397	96751427	GTGAGCCACTGTGCCTGGCCNNNNNNNN
chr9	chr9	88	chr9	GTGAGCCACTGTGCCCGGCCTGGGGATTAA	1	36489806	36489836	GTGAGCCACTGTGCCTGGCCNNNNNNNN
chr9	chr9	88	chr9	GTGAGCCACTGCGCCTGGCCTGGCTCATTG	1	115158754	115158784	GTGAGCCACTGTGCCTGGCCNNNNNNNN
chr8	chr8	88	chr8	GTGAGCCACTACGCCTGGCCCGGTTTTCAC	2	38924129	38924159	GTGAGCCACTGTGCCTGGCCNNNNNNNN
chr8	chr8	88	chr8	GTGAGCCACTGTGCCTGGCCTGGGGTTCTT	0	118545174	118545204	GTGAGCCACTGTGCCTGGCCNNNNNNNN
chr7	chr7	88	chr7	GTGAGCCACCGTGCCTGGCCTGGCTTTGAG	1	99194884	99194914	GTGAGCCACTGTGCCTGGCCNNNNNNNN
chr7	chr7	88	chr7	GTGAGCCACTGCACCTGGCCTGGAAATTTA	2	77575113	77575143	GTGAGCCACTGTGCCTGGCCNNNNNNNN
chr7	chr7	88	chr7	ATGAGCCACCGTGCCTGGCCAGGAAGAGTG	2	40420618	40420648	GTGAGCCACTGTGCCTGGCCNNNNNNNN
chr7	chr7	88	chr7	ATGAGCCACTGTGCCTGGCCTGGGAGCATC	1	27326933	27326963	GTGAGCCACTGTGCCTGGCCNNNNNNNN
chr7	chr7	88	chr7	ATGAGCCACCGCACCTGGCCGGGAATAGGA	4	157329979	157330009	GTGAGCCACTGTGCCTGGCCNNNNNNNN
chr6	chr6	88	chr6	GTGAGCCACTGTGCCTGGCCTGGAACAGTT	0	13319167	13319197	GTGAGCCACTGTGCCTGGCCNNNNNNNN
chr6	chr6	88	chr6	GTGAACCACTGCACCTGGCCTGGCATTAGA	3	124029929	124029959	GTGAGCCACTGTGCCTGGCCNNNNNNNN
chr5	chr5	88	chr5	ATGAGCCACCGCGCCTGGCCAGGTCACTGA	3	160305093	160305123	GTGAGCCACTGTGCCTGGCCNNNNNNNN
chr5	chr5	88	chr5	ATGAGCCACCGTGCCTGGCCAGGAGACAGC	2	156903771	156903801	GTGAGCCACTGTGCCTGGCCNNNNNNNN
chr4	chr4	88	chr4	GTGAGCCACTGTGCCTGACCCGGGCTAATT	1	185221312	185221342	GTGAGCCACTGTGCCTGGCCNNNNNNNN
chr4	chr4	88	chr4	GTGAGCCACTGCACCTGGCCTGGACTCATG	2	173647323	173647353	GTGAGCCACTGTGCCTGGCCNNNNNNNN
chr3	chr3	88	chr3	GTGAGCCACTGCACCTGGCCTGGCCTGCAT	2	73104910	73104940	GTGAGCCACTGTGCCTGGCCNNNNNNNN
chr3	chr3	88	chr3	ATGAGCTACTATGCCTGGCCTGGTTTGATT	3	12838114	12838144	GTGAGCCACTGTGCCTGGCCNNNNNNNN
chr3	chr3	88	chr3	ATGAGCCACCCTGCCTGGCCAGGCAGGCTA	3	119464616	119464646	GTGAGCCACTGTGCCTGGCCNNNNNNNN
chr2	chr2	88	chr2	ATGAGCCACTGTGCCTGGCCAGGAGGTCAT	1	20356537	20356567	GTGAGCCACTGTGCCTGGCCNNNNNNNN
chr2	chr2	88	chr2	GTGAGCCACTGTGCCTGGCCTGGTAGGAAT	0	201076808	201076838	GTGAGCCACTGTGCCTGGCCNNNNNNNN
chr2	chr2	88	chr2	GTGAGCCACTGCGCCTGGCCAGGTCTTTCA	1	131089440	131089470	GTGAGCCACTGTGCCTGGCCNNNNNNNN
chr20	chr20	88	chr20	GTGAGCCACTGTGCCTGTCCAGGAATGACT	1	47232078	47232108	GTGAGCCACTGTGCCTGGCCNNNNNNNN
chr20	chr20	88	chr20	GTGAGCCACTGTGCCCAGCCTGGTATATCT	2	34227340	34227370	GTGAGCCACTGTGCCTGGCCNNNNNNNN
chr1	chr1	88	chr1	ATGAGCCACTGTACCTGGCCTGGACAACTT	2	9933613	9933643	GTGAGCCACTGTGCCTGGCCNNNNNNNN
chr19	chr19	88	chr19	GTGAGCCACTGCACCTGGCCAGGGAGGTAA	2	16598042	16598072	GTGAGCCACTGTGCCTGGCCNNNNNNNN
chr1	chr1	88	chr1	GTGAGCCACCATGCCTGGCCAGGATAATTT	2	91409068	91409098	GTGAGCCACTGTGCCTGGCCNNNNNNNN
chr18	chr18	88	chr18	GTGAGCCACTATGCCTGGCCAGGATTTATT	1	60865703	60865733	GTGAGCCACTGTGCCTGGCCNNNNNNNN
chr17	chr17	88	chr17	GTGAGCCACCGTGCCTGGCCGGGATATCTT	1	66249591	66249621	GTGAGCCACTGTGCCTGGCCNNNNNNNN
chr17	chr17	88	chr17	GTGAGCCACCGTGCCTGGCCAGGAAACTAA	1	3797740	3797770	GTGAGCCACTGTGCCTGGCCNNNNNNNN
chr17	chr17	88	chr17	GTGAGCCACCGCGCCTGGCCAGGTTGCAGT	2	31545356	31545386	GTGAGCCACTGTGCCTGGCCNNNNNNNN
chr16	chr16	88	chr16	GTGAGCCACTGTGCCCGGCCTGGAATGGGT	1	84299058	84299088	GTGAGCCACTGTGCCTGGCCNNNNNNNN
chr16	chr16	88	chr16	ATGAGCCACCGTGCCTGGCCTGGAATGTTA	2	71608129	71608159	GTGAGCCACTGTGCCTGGCCNNNNNNNN
chr16	chr16	88	chr16	GTGAGCCACCGTGCCTGGCCAGGTGCAGAT	1	60766198	60766228	GTGAGCCACTGTGCCTGGCCNNNNNNNN
chr16	chr16	88	chr16	GTGAGCCACCGTGCCCGGCCAGGAGGGGAT	2	31454387	31454417	GTGAGCCACTGTGCCTGGCCNNNNNNNN
chr16	chr16	88	chr16	GTGAGCCACTGTGCCCAGCCTGGGGCAAGT	2	27849805	27849835	GTGAGCCACTGTGCCTGGCCNNNNNNNN
chr15	chr15	88	chr15	GTGAGCCACTGTGCCTGGCTTGGTTTGTTT	1	74879340	74879370	GTGAGCCACTGTGCCTGGCCNNNNNNNN
chr14	chr14	88	chr14	ATGAGCCAATGTGCCTGGCCTGGCTTGGTT	2	64451301	64451331	GTGAGCCACTGTGCCTGGCCNNNNNNNN
chr14	chr14	88	chr14	ATGAGCCACTGCGCCTGGCCAGGGGAAGTC	2	31343348	31343378	GTGAGCCACTGTGCCTGGCCNNNNNNNN
chr1	chr1	88	chr1	GTGAGCCACTGCGCCTGGCCAAGGCATGCT	1	41896853	41896883	GTGAGCCACTGTGCCTGGCCNNNNNNNN
chr1	chr1	88	chr1	ATAAGCCACTGTGCCTGGCCAGGAGGTTTT	2	26924830	26924860	GTGAGCCACTGTGCCTGGCCNNNNNNNN
chr1	chr1	88	chr1	ATGAGCCACTGTGCCCGGCCTGGAGCTACC	2	234314468	234314498	GTGAGCCACTGTGCCTGGCCNNNNNNNN
chr12	chr12	88	chr12	ATGAGCCACTGCGCCTGGCCTGGTTCATTG	2	118035913	118035943	GTGAGCCACTGTGCCTGGCCNNNNNNNN
chr11	chr11	88	chr11	GTGAGCCACTGTGCCTGGCCAGGATTGGAT	0	96344234	96344264	GTGAGCCACTGTGCCTGGCCNNNNNNNN
chr1	chr1	88	chr1	GTGAGCCACCATGCCTGGCCTGGAACTTCT	2	153814480	153814510	GTGAGCCACTGTGCCTGGCCNNNNNNNN
chr10	chr10	88	chr10	ATGAGCCACCATGCCTGGCCGAGACTGACT	3	72330671	72330701	GTGAGCCACTGTGCCTGGCCNNNNNNNN
chr10	chr10	88	chr10	GTGAGCCACTGTGCCCAGCCTGGTCCCTTT	2	68930012	68930042	GTGAGCCACTGTGCCTGGCCNNNNNNNN
chr10	chr10	88	chr10	GTGAGCCACCGTGCCTAGCCTGGACTCTTA	2	26305425	26305455	GTGAGCCACTGTGCCTGGCCNNNNNNNN
chr10	chr10	88	chr10	GTGAGCCACTGCACCTGGCCCGGAACAGGC	2	12743730	12743760	GTGAGCCACTGTGCCTGGCCNNNNNNNN
chrX	chrX	87	chrX	ATGAGCCACTGTGCCTGCCCAGGTTTAGAT	2	18917154	18917184	GTGAGCCACTGTGCCTGGCCNNNNNNNN
chr9	chr9	87	chr9	ATGAGCCACTGCACCTGGCCTGGACTTAAC	3	72555900	72555930	GTGAGCCACTGTGCCTGGCCNNNNNNNN
chr9	chr9	87	chr9	GTGAGCCATTGTGCCTGGCCAGGGAATTTT	1	69183076	69183106	GTGAGCCACTGTGCCTGGCCNNNNNNNN
chr8	chr8	87	chr8	GTAAGCCACTGTGCCTGGCCAGGTTTGTTC	1	42094533	42094563	GTGAGCCACTGTGCCTGGCCNNNNNNNN
chr7	chr7	87	chr7	ATGAGCCACTGCGCCTGGCCTGGTATGGTC	2	84034263	84034293	GTGAGCCACTGTGCCTGGCCNNNNNNNN
chr6	chr6	87	chr6	GTGAGCCACTGTGCCCAGCCTGGATTATGA	2	49689148	49689178	GTGAGCCACTGTGCCTGGCCNNNNNNNN
chr6	chr6	87	chr6	GTGAGCCACCGTGCCTGGCCTGGTAATATT	1	39539622	39539652	GTGAGCCACTGTGCCTGGCCNNNNNNNN
chr5	chr5	87	chr5	GTGAGCCACTGTGCCTGGCCCGGCTCACAC	0	97506224	97506254	GTGAGCCACTGTGCCTGGCCNNNNNNNN
chr5	chr5	87	chr5	GTGAGCCACCGTGCCTGGCCTGGAATTGTT	1	87857079	87857109	GTGAGCCACTGTGCCTGGCCNNNNNNNN
chr5	chr5	87	chr5	GTGAGCCACTGTGCCAGGCCAGGAGTGTGT	1	41905549	41905579	GTGAGCCACTGTGCCTGGCCNNNNNNNN
chr5	chr5	87	chr5	ATGAGCCACTGTGCCTGGCCAGGGCAAGGT	1	172949773	172949803	GTGAGCCACTGTGCCTGGCCNNNNNNNN
chr5	chr5	87	chr5	GTGAGCCACTGCGCCTGGCCAGGAACATGA	1	155628616	155628646	GTGAGCCACTGTGCCTGGCCNNNNNNNN
chr4	chr4	87	chr4	GTGAGCCACTGCGCCTGGCCAGGACCCCAT	1	82979646	82979676	GTGAGCCACTGTGCCTGGCCNNNNNNNN
chr22	chr22	87	chr22	GTGAGCCACTGTGCCCGGCCAGGACCCTGA	1	42640656	42640686	GTGAGCCACTGTGCCTGGCCNNNNNNNN
chr21	chr21	87	chr21	GTGAGCCACCGTGCCTGGCCTGGTTTTGCT	1	40887442	40887472	GTGAGCCACTGTGCCTGGCCNNNNNNNN
chr2	chr2	87	chr2	GTGAGCCACTGTGCCCAGCCCGGCTTTCTT	2	135679038	135679068	GTGAGCCACTGTGCCTGGCCNNNNNNNN
chr2	chr2	87	chr2	GTGAGCCACTGTACCAGGCCTGGCCCAAGT	2	128002831	128002861	GTGAGCCACTGTGCCTGGCCNNNNNNNN
chr2	chr2	87	chr2	GTGAGGCACTATGCCTGGCCAGGGTTACAG	2	109230283	109230313	GTGAGCCACTGTGCCTGGCCNNNNNNNN
chr19	chr19	87	chr19	GTGAGCCACCATGCCTGGCCAGGCCACCTT	2	49367685	49367715	GTGAGCCACTGTGCCTGGCCNNNNNNNN
chr19	chr19	87	chr19	GTGAGCCACTGTGCCTGGCCAAGGTTGCAG	0	4139497	4139527	GTGAGCCACTGTGCCTGGCCNNNNNNNN
chr17	chr17	87	chr17	ATGAGCCACCGTACCTGGCCAGGACATTTT	3	59637061	59637091	GTGAGCCACTGTGCCTGGCCNNNNNNNN
chr17	chr17	87	chr17	ATGAGCCACTGTGCCTGGCCAGGCCATGGA	1	35174090	35174120	GTGAGCCACTGTGCCTGGCCNNNNNNNN
chr17	chr17	87	chr17	ATGAGCCACTGTGCCCGGCCTGGCCCCTCC	2	28692340	28692370	GTGAGCCACTGTGCCTGGCCNNNNNNNN
chr16	chr16	87	chr16	GTGAGCCACCGCGCCTGGCCTGGATTATAT	2	14650030	14650060	GTGAGCCACTGTGCCTGGCCNNNNNNNN
chr15	chr15	87	chr15	GTGAGCCACCGTGCCTGGCCTGGAAGATGT	1	92851086	92851116	GTGAGCCACTGTGCCTGGCCNNNNNNNN
chr15	chr15	87	chr15	GTGAGCCACCATGCCTGGCCAGGAAGCATT	2	83398233	83398263	GTGAGCCACTGTGCCTGGCCNNNNNNNN
chr15	chr15	87	chr15	GTGAGCCACCGTGCCTGGCCAGGCTTGCAG	1	30950377	30950407	GTGAGCCACTGTGCCTGGCCNNNNNNNN
chr1	chr1	87	chr1	ATGAGCCACCATGCCTGGCCAGGCTATAAC	3	51339631	51339661	GTGAGCCACTGTGCCTGGCCNNNNNNNN
chr1	chr1	87	chr1	GTGAGCCACTGTGCCCGGCCTGGAATATCT	1	47337890	47337920	GTGAGCCACTGTGCCTGGCCNNNNNNNN
chr14	chr14	87	chr14	GTGAGTCACTGTGCCTGACCAGGATACTTT	2	36597271	36597301	GTGAGCCACTGTGCCTGGCCNNNNNNNN
chr13	chr13	87	chr13	GTGAGCCACTGTGCCTGGCCAGGAGCTCCA	0	100323595	100323625	GTGAGCCACTGTGCCTGGCCNNNNNNNN
chr1	chr1	87	chr1	GTGAGCCACTGCGCCTGGCCAGGATGGTTC	1	26896730	26896760	GTGAGCCACTGTGCCTGGCCNNNNNNNN
chr12	chr12	87	chr12	GTGAGCCACTGCGCCTGGCCTGGCAGTGGC	1	48742591	48742621	GTGAGCCACTGTGCCTGGCCNNNNNNNN
chr12	chr12	87	chr12	GTGAGCCACTGTGCCTGGCCCGGTTCAGCA	0	122759422	122759452	GTGAGCCACTGTGCCTGGCCNNNNNNNN
chr1	chr1	87	chr1	GTGAGCCACTGTGCCCAGCCGGGATGTTTC	2	211286586	211286616	GTGAGCCACTGTGCCTGGCCNNNNNNNN
chr12	chr12	87	chr12	GTGAGCCACCATGCCTGGCCAGGTCATCTT	2	107171673	107171703	GTGAGCCACTGTGCCTGGCCNNNNNNNN
chr11	chr11	87	chr11	GTGAGCCACTGTGCCTGGCCTGGCTGATTT	0	960657	960687	GTGAGCCACTGTGCCTGGCCNNNNNNNN
chr11	chr11	87	chr11	ATGAGCCACTGTACCTGGCCTGGCCAAGGT	2	68291946	68291976	GTGAGCCACTGTGCCTGGCCNNNNNNNN
chr11	chr11	87	chr11	GTGAGCCACTGCGCCTGGCCAGGTTATTGT	1	118039758	118039788	GTGAGCCACTGTGCCTGGCCNNNNNNNN
chr10	chr10	87	chr10	GTGAGCCACCGTGCCTGGCCGGGAGAATTC	1	84476722	84476752	GTGAGCCACTGTGCCTGGCCNNNNNNNN
chr10	chr10	87	chr10	GTGAACCACTGCGCCTGGCCTGGATCAGTG	2	118266680	118266710	GTGAGCCACTGTGCCTGGCCNNNNNNNN
chr10	chr10	87	chr10	GTGAGCCACTGTGCCTGGCCAGGAGAGGCT	0	103151171	103151201	GTGAGCCACTGTGCCTGGCCNNNNNNNN
chrX	chrX	86	chrX	ATGAGCCACTGTGCCTGGCCAGGATTTCAT	1	65708962	65708992	GTGAGCCACTGTGCCTGGCCNNNNNNNN
chrX	chrX	86	chrX	GTGAGCCACTGTGCCTGACCTGGTTTAGAG	1	50342986	50343016	GTGAGCCACTGTGCCTGGCCNNNNNNNN
chr9	chr9	86	chr9	GTGAGCCACTGTGCCTGGCCAGGAATTTTC	0	68914423	68914453	GTGAGCCACTGTGCCTGGCCNNNNNNNN
chr7	chr7	86	chr7	GTGAGCCACTGTGCCTAGCCTGGGTCTTTC	1	82247217	82247247	GTGAGCCACTGTGCCTGGCCNNNNNNNN
chr7	chr7	86	chr7	ATGAGCCACTGTGCCTGGCAAGGCTGGGTA	2	75702523	75702553	GTGAGCCACTGTGCCTGGCCNNNNNNNN
chr7	chr7	86	chr7	ATGAGCCACTGTGCCCAGCCAGGCTTTTCT	3	43696832	43696862	GTGAGCCACTGTGCCTGGCCNNNNNNNN
chr7	chr7	86	chr7	GTGAGCCACTATGCCTGGCCAGGAATTCAA	1	157149335	157149365	GTGAGCCACTGTGCCTGGCCNNNNNNNN
chr6	chr6	86	chr6	GTGAGCCACTGTGCCTGGCAGGGTTAATTG	1	108334284	108334314	GTGAGCCACTGTGCCTGGCCNNNNNNNN
chr5	chr5	86	chr5	ATGAGCCACTGTGCCTGGCCCGACAAAACC	1	173226945	173226975	GTGAGCCACTGTGCCTGGCCNNNNNNNN
chr4	chr4	86	chr4	GTGAGCCACCATGCCTGGCCGGGAATACAG	2	159181818	159181848	GTGAGCCACTGTGCCTGGCCNNNNNNNN
chr3	chr3	86	chr3	ATGAGCCACTGTGCCTGGCCAGGAGTTAAC	1	6091643	6091673	GTGAGCCACTGTGCCTGGCCNNNNNNNN
chr3	chr3	86	chr3	GTGAGCCACTGTGCCTGGCCAAGTTCTACA	0	12678489	12678519	GTGAGCCACTGTGCCTGGCCNNNNNNNN
chr2	chr2	86	chr2	GTGAGCCACCGTGCCTGGCCTGGCAACATA	1	71200459	71200489	GTGAGCCACTGTGCCTGGCCNNNNNNNN
chr22	chr22	86	chr22	GTGAGCCACTGCACCTGGCCAGGCTCCACT	2	41393048	41393078	GTGAGCCACTGTGCCTGGCCNNNNNNNN
chr22	chr22	86	chr22	ATGAGCCACTGTGCCTGGCCCAGGAGGGCT	1	38307969	38307999	GTGAGCCACTGTGCCTGGCCNNNNNNNN
chr2	chr2	86	chr2	GTGAGCCACTGCACCTGGCCAGGGTTATAT	2	195600783	195600813	GTGAGCCACTGTGCCTGGCCNNNNNNNN
chr2	chr2	86	chr2	GTGAGCCACCATGCCTGGCCGGGACTGATT	2	107353157	107353187	GTGAGCCACTGTGCCTGGCCNNNNNNNN
chr18	chr18	86	chr18	ATGAGCCACTGCACCTGGCCTGGGAACATT	3	21563627	21563657	GTGAGCCACTGTGCCTGGCCNNNNNNNN
chr1	chr1	86	chr1	GTGAGCCACAGCGCCTGGCCAGGAAGCTTA	2	77996966	77996996	GTGAGCCACTGTGCCTGGCCNNNNNNNN
chr17	chr17	86	chr17	GTGAGCCACTGCGCCTGGCCAGGATGGACC	1	4039175	4039205	GTGAGCCACTGTGCCTGGCCNNNNNNNN
chr17	chr17	86	chr17	GTGAGCCACTGTACCTGGCCTGGATAAGCA	1	12135513	12135543	GTGAGCCACTGTGCCTGGCCNNNNNNNN
chr16	chr16	86	chr16	GTGAGCCACTGTGCCCAGCCAGGTTTTGTA	2	87616529	87616559	GTGAGCCACTGTGCCTGGCCNNNNNNNN
chr16	chr16	86	chr16	GTGAGCCACTGAGCCTGGCCAGGTGCTGAT	1	75147566	75147596	GTGAGCCACTGTGCCTGGCCNNNNNNNN
chr16	chr16	86	chr16	GTGAGCCACTGTGCCTGGCCAGGGACAACT	0	67813442	67813472	GTGAGCCACTGTGCCTGGCCNNNNNNNN
chr16	chr16	86	chr16	GTGAGCCACCGTGCCTGGCCAGGATAGCAA	1	65575129	65575159	GTGAGCCACTGTGCCTGGCCNNNNNNNN
chr16	chr16	86	chr16	ATGAGCCACCATGCCTGGCCTGGCACCACT	3	61422205	61422235	GTGAGCCACTGTGCCTGGCCNNNNNNNN
chr15	chr15	86	chr15	GTGAGCCACTGTGCCCGGCCTGGGCAAGGT	1	83089629	83089659	GTGAGCCACTGTGCCTGGCCNNNNNNNN
chr14	chr14	86	chr14	GTGAGCCACCGTGCCTGGCCAGGGCACAGG	1	94295019	94295049	GTGAGCCACTGTGCCTGGCCNNNNNNNN
chr13	chr13	86	chr13	GTGAACCACTGTGCCTGGCCAGGCATGGAC	1	20507948	20507978	GTGAGCCACTGTGCCTGGCCNNNNNNNN
chr1	chr1	86	chr1	ATGAGCCACTGCGCCTGGCCAAGCATGTGT	2	28604184	28604214	GTGAGCCACTGTGCCTGGCCNNNNNNNN
chr12	chr12	86	chr12	GTGAGCCACTGTGCCTGGCCTGGTCCTCTT	0	13779323	13779353	GTGAGCCACTGTGCCTGGCCNNNNNNNN
chr12	chr12	86	chr12	GTGAGCCACCGTGCCTGGCCAAGTACAAAG	1	132093842	132093872	GTGAGCCACTGTGCCTGGCCNNNNNNNN
chr1	chr1	86	chr1	GTGAGCCACTGCGCCTGGCCTAGCATGCAT	1	207753377	207753407	GTGAGCCACTGTGCCTGGCCNNNNNNNN
chr1	chr1	86	chr1	GTGAGCCACCATGCCTGACCAGGGGCTAAT	3	185246908	185246938	GTGAGCCACTGTGCCTGGCCNNNNNNNN
chr11	chr11	86	chr11	ATGAGCCACCGTGTCTGGCCAGGAATTCTT	3	75739386	75739416	GTGAGCCACTGTGCCTGGCCNNNNNNNN
chr11	chr11	86	chr11	ATGAGCCACTGTGCCTGACCTGGTATATTT	2	73694721	73694751	GTGAGCCACTGTGCCTGGCCNNNNNNNN
chr11	chr11	86	chr11	GTGAGCCACTGTGCCTGGCCTGGAACTCAT	0	57507035	57507065	GTGAGCCACTGTGCCTGGCCNNNNNNNN
chr1	chr1	86	chr1	GTGAGCCACCATGCCTGGCCTGGTGCTGGC	2	15716960	15716990	GTGAGCCACTGTGCCTGGCCNNNNNNNN
chr11	chr11	86	chr11	GTGAGCCACTGTGCCTGGCCAAGGTTAAAC	0	118740763	118740793	GTGAGCCACTGTGCCTGGCCNNNNNNNN
chr11	chr11	86	chr11	ATAAGCCACTGTGCCTGGCCTGGAAAAAGT	2	108174898	108174928	GTGAGCCACTGTGCCTGGCCNNNNNNNN
chr10	chr10	86	chr10	GTGAGCCACCATGCCTGGCCCGGACCATCA	2	61950285	61950315	GTGAGCCACTGTGCCTGGCCNNNNNNNN
[truncated: 11,903 more rows]

## Sheet: Tab_S2_SaCas9_Rep-1_PAM
#BED_Chromosome	WindowChromosome	bi.sum.mi	Site_SubstitutionsOnly.Sequence	Site_SubstitutionsOnly.NumSubstitutions	Site_SubstitutionsOnly.Start	Site_SubstitutionsOnly.End	TargetSequence
chr22	chr22	103	GTGAGCCACTGTGCCTGGCCCGGAGTTG	0	19855336	19855364	GTGAGCCACTGTGCCTGGCCNNNNNNNN
chr22	chr22	101	GTGAGCCACTGTGCCTGGCCTGGGGTGA	0	29861100	29861128	GTGAGCCACTGTGCCTGGCCNNNNNNNN
chr9	chr9	84	GTGAGCCACTGTGCCTGGCCGAGAGTTG	0	81805509	81805537	GTGAGCCACTGTGCCTGGCCNNNNNNNN
chr1	chr1	80	GTGAGCCACTGTGCCTGGCCGGGAGATG	0	31302278	31302306	GTGAGCCACTGTGCCTGGCCNNNNNNNN
chr5	chr5	74	GTGAGCCACTGTGCCTGGCCTGGAGTCA	0	125823950	125823978	GTGAGCCACTGTGCCTGGCCNNNNNNNN
chr6	chr6	73	GTGAGCCACTGTGCCTGGCCTTGGGTCA	0	89750547	89750575	GTGAGCCACTGTGCCTGGCCNNNNNNNN
chr6	chr6	72	ATGAGCCACTGCGCCTGGCCAGGAGTTT	2	126310540	126310568	GTGAGCCACTGTGCCTGGCCNNNNNNNN
chr6	chr6	71	GTGAGCCACCGTGCCTGGCCTGGAGTAA	1	7094751	7094779	GTGAGCCACTGTGCCTGGCCNNNNNNNN
chr1	chr1	67	ATGAGCCACTGTGCCTGGCCTGGAGTTA	1	22353047	22353075	GTGAGCCACTGTGCCTGGCCNNNNNNNN
chr16	chr16	65	ATGAGCCACTGTGCCTGGCCCAGAGTCT	1	16290828	16290856	GTGAGCCACTGTGCCTGGCCNNNNNNNN
chr6	chr6	64	GTGAACCACTGTGCCTGGCCAAGAGTTG	1	119032344	119032372	GTGAGCCACTGTGCCTGGCCNNNNNNNN
chr1	chr1	62	GAGAGCCACTGTGCCTGGCCAAGAGTCT	1	38254611	38254639	GTGAGCCACTGTGCCTGGCCNNNNNNNN
chr12	chr12	62	GTGAGCCACTGTGCCTGGACAGGAATGC	1	111329164	111329192	GTGAGCCACTGTGCCTGGCCNNNNNNNN
chr1	chr1	61	GTGAGCCACTGTGCCTGGCCAAGAATGC	0	192103620	192103648	GTGAGCCACTGTGCCTGGCCNNNNNNNN
chr2	chr2	59	GTGAGCCACTATGCCTGGCCAAGAGTTT	1	166317643	166317671	GTGAGCCACTGTGCCTGGCCNNNNNNNN
chr10	chr10	58	GTGAGCCACTGTGCCTGGCCAGGGGTTG	0	94556369	94556397	GTGAGCCACTGTGCCTGGCCNNNNNNNN
chr19	chr19	57	GTGAGCCACTGTGCCCGGCCTGGAGTTT	1	17005562	17005590	GTGAGCCACTGTGCCTGGCCNNNNNNNN
chr12	chr12	57	GTGAGCCACTGTGCCTGGCCAGGGATAC	0	62376243	62376271	GTGAGCCACTGTGCCTGGCCNNNNNNNN
chr10	chr10	57	GTGAGCCACTGTGCCCGGCCAAGAGTCT	1	119241215	119241243	GTGAGCCACTGTGCCTGGCCNNNNNNNN
chr7	chr7	56	GTGAGCCACTGTGCCTGGCCCAGAGTTC	0	4764106	4764134	GTGAGCCACTGTGCCTGGCCNNNNNNNN
chr7	chr7	56	GTGAGCCACTGTGCCTGGCCGAGAATAC	0	154093755	154093783	GTGAGCCACTGTGCCTGGCCNNNNNNNN
chr7	chr7	55	GTGAGCCACTGTGCCTGGCCGAGGATGA	0	99606951	99606979	GTGAGCCACTGTGCCTGGCCNNNNNNNN
chr7	chr7	55	GTGAGCCACTGTGCCTGGTCTGGAGTAG	1	17966218	17966246	GTGAGCCACTGTGCCTGGCCNNNNNNNN
chr13	chr13	55	GTGAGCCACTGTGCCTGGCCCAGGATTT	0	83015469	83015497	GTGAGCCACTGTGCCTGGCCNNNNNNNN
chr22	chr22	54	GTGAGCCACTGTGCCTGGCCTCGGGTAG	0	38700838	38700866	GTGAGCCACTGTGCCTGGCCNNNNNNNN
chr19	chr19	54	GTGAGCCACTGTGCCCAGCCACGAGTTT	2	39065385	39065413	GTGAGCCACTGTGCCTGGCCNNNNNNNN
chr17	chr17	54	GTGAGCCACTGTGCCTGGCCAGGAATTT	0	59957823	59957851	GTGAGCCACTGTGCCTGGCCNNNNNNNN
chr3	chr3	53	GTGAGCCACTGTGCCTGGCCAGGAGTTT	0	153734735	153734763	GTGAGCCACTGTGCCTGGCCNNNNNNNN
chr21	chr21	53	ATGAGCCACTGTGCCCGGCCAGGAGTTT	2	34785140	34785168	GTGAGCCACTGTGCCTGGCCNNNNNNNN
chr1	chr1	53	GTGAGCCACTGTGCCTGGCCAGGAATGC	0	109787744	109787772	GTGAGCCACTGTGCCTGGCCNNNNNNNN
chrX	chrX	52	GTGAGCCACTGTGCCTGGCCAAGGGTAT	0	1737998	1738026	GTGAGCCACTGTGCCTGGCCNNNNNNNN
chr5	chr5	52	GTGAGCCACTGTGCCTGGCCAAGAGTGC	0	37819834	37819862	GTGAGCCACTGTGCCTGGCCNNNNNNNN
chr1	chr1	52	ATGAGCCACCGTGCCTGGCCAGGAGTAG	2	67593597	67593625	GTGAGCCACTGTGCCTGGCCNNNNNNNN
chr11	chr11	52	GTGAGCCACTGTGCCTGGCCCTGGGTTT	0	14437761	14437789	GTGAGCCACTGTGCCTGGCCNNNNNNNN
chr8	chr8	50	GTGAGCCATTGTGCCTGGCCAAGAGTTT	1	13312341	13312369	GTGAGCCACTGTGCCTGGCCNNNNNNNN
chr18	chr18	49	ATGAGCCACTGTGCCTGGCCAAGAATTA	1	32350966	32350994	GTGAGCCACTGTGCCTGGCCNNNNNNNN
chrX	chrX	48	GTGAGCCACTGTGCCCGGCCAGGAGTAA	1	50147684	50147712	GTGAGCCACTGTGCCTGGCCNNNNNNNN
chr7	chr7	48	GTGAGCCACTGTGCCTGGCCAAGAGTAT	0	12844222	12844250	GTGAGCCACTGTGCCTGGCCNNNNNNNN
chr21	chr21	48	GTGAGCCACTGTGCCTGGCCTGGGGATT	0	45767412	45767440	GTGAGCCACTGTGCCTGGCCNNNNNNNN
chr14	chr14	48	GTGAGCCACTGTGCCTGGCCAGGAATGA	0	39574452	39574480	GTGAGCCACTGTGCCTGGCCNNNNNNNN
chr12	chr12	48	GTGAGCCACTGTGCCTGGCCTGGGGTCT	0	120641355	120641383	GTGAGCCACTGTGCCTGGCCNNNNNNNN
chr8	chr8	47	GTGAGCCACTGTGCCTGGCCGAGGGTAG	0	67919392	67919420	GTGAGCCACTGTGCCTGGCCNNNNNNNN
chr7	chr7	47	GTGAGCCACTATGCCTGGCCAGGAATTC	1	156942029	156942057	GTGAGCCACTGTGCCTGGCCNNNNNNNN
chr6	chr6	47	GTGAACCACTGTGCCTGGCCAAGAGTTA	1	111261915	111261943	GTGAGCCACTGTGCCTGGCCNNNNNNNN
chr17	chr17	47	GTGAGCCACTGTGCCTGGCCAAGAGTAT	0	2581891	2581919	GTGAGCCACTGTGCCTGGCCNNNNNNNN
chr15	chr15	47	ATGAGCCACTGTGCCTGGCCAAGAATCA	1	92949935	92949963	GTGAGCCACTGTGCCTGGCCNNNNNNNN
chr1	chr1	47	ATGAGCCACTGTGCCCAGCCTAGAGTTG	3	150503680	150503708	GTGAGCCACTGTGCCTGGCCNNNNNNNN
chrX	chrX	46	GTGAGCCACTGTGCCTGGCCCAGAATGT	0	117899352	117899380	GTGAGCCACTGTGCCTGGCCNNNNNNNN
chr8	chr8	46	GTGAGCCACTGCGCCTGGCCTTGAGTTG	1	12403158	12403186	GTGAGCCACTGTGCCTGGCCNNNNNNNN
chr19	chr19	46	GTGAGCCACTGTGCCCAGCCTGGAGTTG	2	49640589	49640617	GTGAGCCACTGTGCCTGGCCNNNNNNNN
chr16	chr16	46	ATGAGCCACTGTGCCTGGCCTTGGGTTC	1	4053967	4053995	GTGAGCCACTGTGCCTGGCCNNNNNNNN
chr15	chr15	46	GTGAGCCACCGTGCCTGGCCAAGAATCA	1	89021932	89021960	GTGAGCCACTGTGCCTGGCCNNNNNNNN
chr1	chr1	46	GTGAGCCACCGTGCCTGGCCAAGAATTG	1	200366538	200366566	GTGAGCCACTGTGCCTGGCCNNNNNNNN
chrUn_GL000224	chrUn_GL000224	45	GTGAGCCACTGTGCCTGGCCTGGAATTT	0	28613	28641	GTGAGCCACTGTGCCTGGCCNNNNNNNN
chr9	chr9	45	GTGAGCCACTGTGCCCGGCCTAGAGTTT	1	86969472	86969500	GTGAGCCACTGTGCCTGGCCNNNNNNNN
chr4	chr4	45	GTGAGCCACTGTGCCTGGCCAGGAATAC	0	144444459	144444487	GTGAGCCACTGTGCCTGGCCNNNNNNNN
chr22	chr22	45	ATGAGCCGTTGTGCCTGGCCGAGGGTTC	3	43589077	43589105	GTGAGCCACTGTGCCTGGCCNNNNNNNN
chr17	chr17	45	GTGAGCCACTGTGCCTGGTCAAGGGTTT	1	47323417	47323445	GTGAGCCACTGTGCCTGGCCNNNNNNNN
chr12	chr12	45	GTGAGCCACTGTGCCTAGCCTGGAGTTT	1	1228324	1228352	GTGAGCCACTGTGCCTGGCCNNNNNNNN
chr5	chr5	44	GTGAGCCACTGTGCCCAGCCAAGAGTGA	2	140915576	140915604	GTGAGCCACTGTGCCTGGCCNNNNNNNN
chr22	chr22	44	GTGAGCCACTGTGCCTGGCCGGGAGTCA	0	41195644	41195672	GTGAGCCACTGTGCCTGGCCNNNNNNNN
chr1	chr1	44	GTGAACCACTGTGCCTGGCCAAGAGTTT	1	78305697	78305725	GTGAGCCACTGTGCCTGGCCNNNNNNNN
chr16	chr16	44	GTGAGCCACTGTGCCCAGCCATGAATGT	2	28512230	28512258	GTGAGCCACTGTGCCTGGCCNNNNNNNN
chr13	chr13	44	GTGAGCCACTGTGCCTGGCCGAGAGTGA	0	99207545	99207573	GTGAGCCACTGTGCCTGGCCNNNNNNNN
chr1	chr1	44	GTGAGCCACTGTGCCAGGCCGAGAGTGC	1	31248766	31248794	GTGAGCCACTGTGCCTGGCCNNNNNNNN
chr11	chr11	44	GTGAGCCACTGTGCCCGGCCGAGAGTTG	1	72233907	72233935	GTGAGCCACTGTGCCTGGCCNNNNNNNN
chr1	chr1	44	GTGAGCCACTGCGCCTGGCCAAGAGTCT	1	155356138	155356166	GTGAGCCACTGTGCCTGGCCNNNNNNNN
chrX	chrX	43	GTGAGCCACCATGCCTGGCCAAGAGTAG	2	112320314	112320342	GTGAGCCACTGTGCCTGGCCNNNNNNNN
chr9	chr9	43	GTGAGCCACTGTGCCTGGCCTGGAGTCT	0	99490310	99490338	GTGAGCCACTGTGCCTGGCCNNNNNNNN
chr9	chr9	43	GTGAGCCACTGTGCCTGGCCGAGAATTT	0	110579675	110579703	GTGAGCCACTGTGCCTGGCCNNNNNNNN
chr6	chr6	43	ATGAGCCACTGTGCCTGGCCAAGAGTTT	1	134786867	134786895	GTGAGCCACTGTGCCTGGCCNNNNNNNN
chr5	chr5	43	GTGAGCCACTGTGCCTGGCCAGGAATTC	0	166690799	166690827	GTGAGCCACTGTGCCTGGCCNNNNNNNN
chr13	chr13	43	GTGAGCCACTGTGCCTGGCCCAGAGTAG	0	57046324	57046352	GTGAGCCACTGTGCCTGGCCNNNNNNNN
chr10	chr10	43	GTGAGCCACTGTGCCCAGCCTAGGGTTC	2	114764711	114764739	GTGAGCCACTGTGCCTGGCCNNNNNNNN
chr2	chr2	42	GTGAGCCACTGTGCCTGGCCAAGGGTCA	0	23061774	23061802	GTGAGCCACTGTGCCTGGCCNNNNNNNN
chr17	chr17	42	GTGAGCCACTGTGCCTGGCCGAGGGTGT	0	27079761	27079789	GTGAGCCACTGTGCCTGGCCNNNNNNNN
chr1	chr1	42	GTGAGCCACTGTGCCTGGCCATGAATTA	0	243463444	243463472	GTGAGCCACTGTGCCTGGCCNNNNNNNN
chr10	chr10	42	GTGAGCCACTGTGCCTGGCCTGGAATTT	0	80006070	80006098	GTGAGCCACTGTGCCTGGCCNNNNNNNN
chrX	chrX	41	GTGAGCCACTGTGCCTGGCCTAGGATTG	0	113328116	113328144	GTGAGCCACTGTGCCTGGCCNNNNNNNN
chr9	chr9	41	GTGAGCCACTGTGCCCAGCCCAGAGTTT	2	116026313	116026341	GTGAGCCACTGTGCCTGGCCNNNNNNNN
chr5	chr5	41	GTGAGCCACTGTGCCTGGCCTGGAATTG	0	13842198	13842226	GTGAGCCACTGTGCCTGGCCNNNNNNNN
chr12	chr12	41	GTGAGCCACTGTGCCCGGCCAAGAGTTG	1	77401258	77401286	GTGAGCCACTGTGCCTGGCCNNNNNNNN
chr1	chr1	41	GTGAGCCACTGTGCCTGGCCAGGAAATG	0	236255741	236255769	GTGAGCCACTGTGCCTGGCCNNNNNNNN
chr12	chr12	41	ATGAGCCACTGTGCCTGGCCTAGAGTTA	1	10304086	10304114	GTGAGCCACTGTGCCTGGCCNNNNNNNN
chr10	chr10	41	GTGAGCCACTGTGCCTGGCCCGGAGTTA	0	24965842	24965870	GTGAGCCACTGTGCCTGGCCNNNNNNNN
chr7	chr7	40	GTGAGCCACTGTGCCCGGCCCAGGGTTT	1	100724106	100724134	GTGAGCCACTGTGCCTGGCCNNNNNNNN
chr2	chr2	40	GTGAGCCACAGTGCCCAGCCAAGAGTTT	3	146978188	146978216	GTGAGCCACTGTGCCTGGCCNNNNNNNN
chr18	chr18	40	GTGAGCCACTGTGCCCGGCCTGGAGTGT	1	37479429	37479457	GTGAGCCACTGTGCCTGGCCNNNNNNNN
chr15	chr15	40	GAGAGCCACTGTGCCTGGCCTTGAATGG	1	90689123	90689151	GTGAGCCACTGTGCCTGGCCNNNNNNNN
chr13	chr13	40	GTGAGCCACTGTGCCTGGCCAGGGGTTG	0	32930486	32930514	GTGAGCCACTGTGCCTGGCCNNNNNNNN
chr1	chr1	40	ATGAGCCACTGTGCCTGGCCTAGAGTAT	1	212880705	212880733	GTGAGCCACTGTGCCTGGCCNNNNNNNN
chr11	chr11	40	GTGAGCCACTGTGCCTGGCCTTGGGTAT	0	38985508	38985536	GTGAGCCACTGTGCCTGGCCNNNNNNNN
chr10	chr10	40	GTGAGCCACTGTGCCTGGCCAGGAATTA	0	75345490	75345518	GTGAGCCACTGTGCCTGGCCNNNNNNNN
chr21	chr21	39	GTGAGCCACTGTGCCTGGCCCAGAGTTT	0	44381809	44381837	GTGAGCCACTGTGCCTGGCCNNNNNNNN
chr21	chr21	39	GTGAGCCACCGTGCCTGGCCTTGAATCA	1	38150859	38150887	GTGAGCCACTGTGCCTGGCCNNNNNNNN
chr17	chr17	39	GTGAGCCACTGTGCCTGGCCAGGAAATT	0	45718704	45718732	GTGAGCCACTGTGCCTGGCCNNNNNNNN
chr1	chr1	39	GTGAGCCACTGTGCCCAGCCCAGAGTAG	2	46005795	46005823	GTGAGCCACTGTGCCTGGCCNNNNNNNN
chr13	chr13	39	GTGAGCCACTGTGTCTGGCCGAGAAACA	1	63994616	63994644	GTGAGCCACTGTGCCTGGCCNNNNNNNN
chr11	chr11	39	GTGAGCCACTGTGCCTGGCCAAGAACTT	0	75537161	75537189	GTGAGCCACTGTGCCTGGCCNNNNNNNN
chr6	chr6	38	GTGAGCCACTGTGCCTGGCCATGAATTT	0	4309228	4309256	GTGAGCCACTGTGCCTGGCCNNNNNNNN
chr4	chr4	38	GTGAGCCACTGTGCCTGGCCTAGAGTGG	0	62966111	62966139	GTGAGCCACTGTGCCTGGCCNNNNNNNN
chr3	chr3	38	GTGAGCCACTGTGCCTGGCCAGGAATCT	0	138517284	138517312	GTGAGCCACTGTGCCTGGCCNNNNNNNN
chr3	chr3	38	GTGAGCCACTGTGCCCAGCCAAGAGTGT	2	127955097	127955125	GTGAGCCACTGTGCCTGGCCNNNNNNNN
chr2	chr2	38	GTGAGCCACTGTGCCCAGCCTCGAGTTA	2	27635762	27635790	GTGAGCCACTGTGCCTGGCCNNNNNNNN
chr22	chr22	38	GTGAGCCACCGTGCCTGGCCATGAGTCT	1	34339142	34339170	GTGAGCCACTGTGCCTGGCCNNNNNNNN
chr17	chr17	38	ATGAGCCACTGTGCCTGGCCATGAATAC	1	34220375	34220403	GTGAGCCACTGTGCCTGGCCNNNNNNNN
chr10	chr10	38	GTGAGCCACTGTGCCTGGCCAAGAATGC	0	75845904	75845932	GTGAGCCACTGTGCCTGGCCNNNNNNNN
chrX	chrX	37	GTGAGTCACTGTGCCCAGCCAAGAGTCC	3	24497610	24497638	GTGAGCCACTGTGCCTGGCCNNNNNNNN
chr7	chr7	37	ATGAGCCACTGTGCCTGGCCATGAGTCT	1	6606244	6606272	GTGAGCCACTGTGCCTGGCCNNNNNNNN
chr6	chr6	37	ATGAGCCACTGTGCCTAGCCAGGAGTAC	2	154624765	154624793	GTGAGCCACTGTGCCTGGCCNNNNNNNN
chr1	chr1	37	GTGAGCCACTGTGCCTGGCCAGGGATCT	0	76438569	76438597	GTGAGCCACTGTGCCTGGCCNNNNNNNN
chr17	chr17	37	ATGAGCCACTGTGCCTGGCCAGGAATGT	1	16476342	16476370	GTGAGCCACTGTGCCTGGCCNNNNNNNN
chr1	chr1	37	GTGAGCCACTGTGCCCAGCCAAGAGTGA	2	238179639	238179667	GTGAGCCACTGTGCCTGGCCNNNNNNNN
chr1	chr1	37	GTGAGCCACTGTGCCTAGCCAGGAGTAT	1	10381441	10381469	GTGAGCCACTGTGCCTGGCCNNNNNNNN
chr10	chr10	37	GTGAGCCACCGTGCCTGGCCAAGAGTCA	1	43131979	43132007	GTGAGCCACTGTGCCTGGCCNNNNNNNN
chr10	chr10	37	GTGAGCCACTGTGCCTGGCCAAGAATGA	0	15390257	15390285	GTGAGCCACTGTGCCTGGCCNNNNNNNN
chr6	chr6	36	GTGAGCCACTGCGCCTGGCCAGGAGTCT	1	113736589	113736617	GTGAGCCACTGTGCCTGGCCNNNNNNNN
chr5	chr5	36	ATGAGCCACTGTGCCTGGCCAAGAGTGA	1	6781527	6781555	GTGAGCCACTGTGCCTGGCCNNNNNNNN
chr5	chr5	36	ATGAGCCACTGTGCCTGGCCTAGAGTGA	1	166091423	166091451	GTGAGCCACTGTGCCTGGCCNNNNNNNN
chr3	chr3	36	GTGAGCCACTGTGCCTGGCCAGGAGTCT	0	17857583	17857611	GTGAGCCACTGTGCCTGGCCNNNNNNNN
chr2	chr2	36	GTGAGCCACTGTGCCTGGCCAAGAGTTT	0	70542777	70542805	GTGAGCCACTGTGCCTGGCCNNNNNNNN
chr22	chr22	36	GTGAGCCATTATGCCTGGCCTGGAGTAG	2	25395474	25395502	GTGAGCCACTGTGCCTGGCCNNNNNNNN
chr22	chr22	36	GTGAGCCACTGTGCCCAGCCGGGAGTGC	2	24138259	24138287	GTGAGCCACTGTGCCTGGCCNNNNNNNN
chr20	chr20	36	GTGAGCCACTGTGCCTGGCCTGGAATTT	0	35196044	35196072	GTGAGCCACTGTGCCTGGCCNNNNNNNN
chr15	chr15	36	GTGAGCCACTGTGCCTGGCCCAGAGTCA	0	44200118	44200146	GTGAGCCACTGTGCCTGGCCNNNNNNNN
chr13	chr13	36	GTGAGCCACTGTGCCCGGCCCTGAATTT	1	71853787	71853815	GTGAGCCACTGTGCCTGGCCNNNNNNNN
chr13	chr13	36	GTGAGCCACTGTGCCTGGACCCGAGTCC	1	21593064	21593092	GTGAGCCACTGTGCCTGGCCNNNNNNNN
chr12	chr12	36	ATGAGCCACTGTGCCTGGCCTGGAGTAT	1	65070827	65070855	GTGAGCCACTGTGCCTGGCCNNNNNNNN
chr12	chr12	36	GTGAGCCACTGTGCCTGGCCTTGGGTCT	0	112737829	112737857	GTGAGCCACTGTGCCTGGCCNNNNNNNN
chrX	chrX	35	GTGAGCCACTGTGCCTGGCCCAGAATAT	0	118764526	118764554	GTGAGCCACTGTGCCTGGCCNNNNNNNN
chr7	chr7	35	GTGAGCCACTGTGCCTGGCCCTGAATGT	0	150461006	150461034	GTGAGCCACTGTGCCTGGCCNNNNNNNN
chr6	chr6	35	ATGAGCCACTGTGCCCAGCCAAGAGTAG	3	136520675	136520703	GTGAGCCACTGTGCCTGGCCNNNNNNNN
chr6	chr6	35	ATGAGCCACTGTGCCTGGCCAAGAAATC	1	135289666	135289694	GTGAGCCACTGTGCCTGGCCNNNNNNNN
chr4	chr4	35	ATGAGCCACTGTGCCTGGCCAAGGGTCT	1	72820240	72820268	GTGAGCCACTGTGCCTGGCCNNNNNNNN
chr2	chr2	35	GTGAGCCACTGTGCCTGGCCAAGAACCC	0	217272525	217272553	GTGAGCCACTGTGCCTGGCCNNNNNNNN
chr2	chr2	35	GTGAGCCACCGTGCCTGGCCTTGAGTTA	1	131590566	131590594	GTGAGCCACTGTGCCTGGCCNNNNNNNN
chr1	chr1	35	GTGAGCCACTGTGCCTGGCCCAGAGTCT	0	95470057	95470085	GTGAGCCACTGTGCCTGGCCNNNNNNNN
chr1	chr1	35	ATGAGCCACTGCGCCTGGCCAAGGGTGA	2	90232759	90232787	GTGAGCCACTGTGCCTGGCCNNNNNNNN
chr17	chr17	35	GTGAGCCACTGTGCCCAGCCATGAATCT	2	58844987	58845015	GTGAGCCACTGTGCCTGGCCNNNNNNNN
chr17	chr17	35	GTGAGCCACCGTGCCTGGCCCCGAGTGT	1	46483139	46483167	GTGAGCCACTGTGCCTGGCCNNNNNNNN
chr16	chr16	35	GTGAGCCACTGTGCCTGGCCAAGGATGT	0	66482756	66482784	GTGAGCCACTGTGCCTGGCCNNNNNNNN
chr16	chr16	35	GTGAGCCACTGTGCCTGGCCCAGAGTCT	0	19539926	19539954	GTGAGCCACTGTGCCTGGCCNNNNNNNN
chr12	chr12	35	ATGAGCCACTGTGCCTGGCCAGGAGTAC	1	95741253	95741281	GTGAGCCACTGTGCCTGGCCNNNNNNNN
chr10	chr10	35	GTGAGCCACTGCGCCTGGCCTAGAATCT	1	34643973	34644001	GTGAGCCACTGTGCCTGGCCNNNNNNNN
chr10	chr10	35	GTGAGCCACCGTGCCTGGCCTCGAGTTT	1	13028080	13028108	GTGAGCCACTGTGCCTGGCCNNNNNNNN
chr10	chr10	35	GTGAGCCACTGTGCCTGGCCAGGAGTCC	0	103918561	103918589	GTGAGCCACTGTGCCTGGCCNNNNNNNN
chr9	chr9	34	GTGAGCCACTGTGCCTGGCCAAGGGTTC	0	95668753	95668781	GTGAGCCACTGTGCCTGGCCNNNNNNNN
chr8	chr8	34	ATGAGCCACTGTGCCTGGCCATGGGTGT	1	41171798	41171826	GTGAGCCACTGTGCCTGGCCNNNNNNNN
chr8	chr8	34	GTGAGCCACTATGCCTGGCCTAGAGTTA	1	103975343	103975371	GTGAGCCACTGTGCCTGGCCNNNNNNNN
chr7	chr7	34	GTGAGCCACCGCGCCTGGCCAGGAGTTA	2	4144894	4144922	GTGAGCCACTGTGCCTGGCCNNNNNNNN
chr7	chr7	34	GTGAGCCACTGTGCCTGGCCAAGGGTGA	0	106053134	106053162	GTGAGCCACTGTGCCTGGCCNNNNNNNN
chr6	chr6	34	GTGAGCCACTGTGCCTGGCCAAGAGTGG	0	167889767	167889795	GTGAGCCACTGTGCCTGGCCNNNNNNNN
chr2	chr2	34	GTGAGCCACTGTGCCCGGCCTGGAGTCT	1	152179504	152179532	GTGAGCCACTGTGCCTGGCCNNNNNNNN
chr18	chr18	34	ATGAGCCACTGTGCCTGGCCTGGGGTAT	1	22887875	22887903	GTGAGCCACTGTGCCTGGCCNNNNNNNN
chr17	chr17	34	GTGAGCCACTGTGCCCGGCCCAGAGTCT	1	79511904	79511932	GTGAGCCACTGTGCCTGGCCNNNNNNNN
chr17	chr17	34	GTGAGCCACTGTGCCTGGCCTAGGATCA	0	65404349	65404377	GTGAGCCACTGTGCCTGGCCNNNNNNNN
chr16	chr16	34	GTGAGCCACTGCGCCTGGCCAAGAGCTG	1	68836653	68836681	GTGAGCCACTGTGCCTGGCCNNNNNNNN
chr15	chr15	34	ATGAGCCACTGTGCCTGGCCAAGGATTT	1	89808717	89808745	GTGAGCCACTGTGCCTGGCCNNNNNNNN
chr1	chr1	34	ATGAGCCACTGTGCCTGGCCAAGAGTTT	1	171696081	171696109	GTGAGCCACTGTGCCTGGCCNNNNNNNN
chr11	chr11	34	GTGAGCCACTGTGCCTGGCCGGGGGTAT	0	104771050	104771078	GTGAGCCACTGTGCCTGGCCNNNNNNNN
chr10	chr10	34	ATGAGCCACTGTGCCTGGCCAAGAGTGT	1	98358093	98358121	GTGAGCCACTGTGCCTGGCCNNNNNNNN
chr10	chr10	34	GTGAGCCACTGCGCCTGGCCCAGAGTTT	1	3069026	3069054	GTGAGCCACTGTGCCTGGCCNNNNNNNN
chrX	chrX	33	GTGAGCCACTGTGCCTGGCCCTGAATTT	0	46928581	46928609	GTGAGCCACTGTGCCTGGCCNNNNNNNN
chr9	chr9	33	GTGAGCCACTGTGCCTGGCCGAGAGTTT	0	94412174	94412202	GTGAGCCACTGTGCCTGGCCNNNNNNNN
chr6	chr6	33	GTGAGCCACTGTGCCCAGCCGGGAGTTT	2	83458715	83458743	GTGAGCCACTGTGCCTGGCCNNNNNNNN
chr5	chr5	33	GTGAGCCCCTGTGCCTGGCCAGGGGTCA	1	68092766	68092794	GTGAGCCACTGTGCCTGGCCNNNNNNNN
chr5	chr5	33	GTGAGCCACTGTGCCTGGCCAAGAAAGA	0	10351053	10351081	GTGAGCCACTGTGCCTGGCCNNNNNNNN
chr21	chr21	33	GTGAGCCACTGTGCCTGGCCAGGAATGG	0	40767569	40767597	GTGAGCCACTGTGCCTGGCCNNNNNNNN
chr21	chr21	33	GTGAGCCACTGCGCCTGGCCAGGGGTTG	1	17854475	17854503	GTGAGCCACTGTGCCTGGCCNNNNNNNN
chr19	chr19	33	GTGAGCCACTGCGCCTGGCCAGGAGTGG	1	29323909	29323937	GTGAGCCACTGTGCCTGGCCNNNNNNNN
chr1	chr1	33	GTGAGCCACTGTGCCCAGCCTAGGATTT	2	78475587	78475615	GTGAGCCACTGTGCCTGGCCNNNNNNNN
chr1	chr1	33	GTGAGCCACTGCGCCCAGCCTAGAGTGT	3	73661459	73661487	GTGAGCCACTGTGCCTGGCCNNNNNNNN
chr16	chr16	33	ATGAGCCACTGTGCCTGGCCAGGAGTTC	1	26627926	26627954	GTGAGCCACTGTGCCTGGCCNNNNNNNN
chr1	chr1	33	ATGAGCCACTGTGCCCAGCCGAGAGTTA	3	62558694	62558722	GTGAGCCACTGTGCCTGGCCNNNNNNNN
chr14	chr14	33	ATGAGCCACTGTGCCTGGCCAGGGATTC	1	89834696	89834724	GTGAGCCACTGTGCCTGGCCNNNNNNNN
chr13	chr13	33	ATGAGCCACTGTGCCTGGCCTGGAATAA	1	96074489	96074517	GTGAGCCACTGTGCCTGGCCNNNNNNNN
chr12	chr12	33	GAGAGCCACTGTGCCTGGCCAAGAATAG	1	111942376	111942404	GTGAGCCACTGTGCCTGGCCNNNNNNNN
chr1	chr1	33	GTGAGCCACTGTGCCTGGCCAGGAATGT	0	184552252	184552280	GTGAGCCACTGTGCCTGGCCNNNNNNNN
chr11	chr11	33	GTGAGCCACCGTGCCTGGCCAAGGGTTC	1	47755165	47755193	GTGAGCCACTGTGCCTGGCCNNNNNNNN
chr7	chr7	32	GTGAGCCACTGTGCCCGGCCGGGAGTTT	1	68914992	68915020	GTGAGCCACTGTGCCTGGCCNNNNNNNN
chr5	chr5	32	GTGAGCCACTGCGCCTGGCCAGGAGTTC	1	17034661	17034689	GTGAGCCACTGTGCCTGGCCNNNNNNNN
chr3	chr3	32	GTGAGCCACTGTGCCTAGCCAAGGGTTA	1	53337575	53337603	GTGAGCCACTGTGCCTGGCCNNNNNNNN
chr3	chr3	32	GTGAGCCACTGTGCCCAGCCTAGGGTGC	2	53113459	53113487	GTGAGCCACTGTGCCTGGCCNNNNNNNN
chr22	chr22	32	GTGAGCCATTGCGCCCGGCCAGGAGTCT	3	38872502	38872530	GTGAGCCACTGTGCCTGGCCNNNNNNNN
chr2	chr2	32	GTGAGCCACTGTGCCTGGCCAGGAAGCA	0	223589816	223589844	GTGAGCCACTGTGCCTGGCCNNNNNNNN
chr2	chr2	32	GTGAGCCACTGTGCCTGGCCAAGAATTT	0	20576687	20576715	GTGAGCCACTGTGCCTGGCCNNNNNNNN
chr20	chr20	32	GTGAGCCACCGTGCCTGGCCTGGAATGA	1	2381529	2381557	GTGAGCCACTGTGCCTGGCCNNNNNNNN
chr19	chr19	32	GTGAGCCACTGCGCCTGGCCCAGGATCA	1	19143248	19143276	GTGAGCCACTGTGCCTGGCCNNNNNNNN
chr19	chr19	32	GTGAGTCACTGTGCCCAGCCAGGAGTTG	3	14233451	14233479	GTGAGCCACTGTGCCTGGCCNNNNNNNN
chr17	chr17	32	GTGAGCCACTGTGCCTGGCCCAGAATCT	0	74688141	74688169	GTGAGCCACTGTGCCTGGCCNNNNNNNN
chr16	chr16	32	GTGAGCCACTGTGCCTGGCCTGGAATTT	0	87121221	87121249	GTGAGCCACTGTGCCTGGCCNNNNNNNN
chr16	chr16	32	GTGAGCCACTGTGTCTGGCCATGAGTGC	1	30151958	30151986	GTGAGCCACTGTGCCTGGCCNNNNNNNN
chr15	chr15	32	GTGAGCCACTGTGCCTGGCCTTGAAACA	0	79325872	79325900	GTGAGCCACTGTGCCTGGCCNNNNNNNN
chr13	chr13	32	GTGAGCCACTGTGCCTGGCCCTGAAATC	0	95170206	95170234	GTGAGCCACTGTGCCTGGCCNNNNNNNN
chr12	chr12	32	GTGAGCCACTGTGCCTGGCCAAGGATGT	0	56585497	56585525	GTGAGCCACTGTGCCTGGCCNNNNNNNN
chr1	chr1	32	GTGAGCCACTGTGCCCAGCCAAGAGTTG	2	113203715	113203743	GTGAGCCACTGTGCCTGGCCNNNNNNNN
chr1	chr1	32	GTGAGCCATTGTGCCTGGCCTAGAGTAC	1	103357140	103357168	GTGAGCCACTGTGCCTGGCCNNNNNNNN
chr6	chr6	31	GTGAGCCACCGTGCCTGGCCAGGAGTTT	1	26316413	26316441	GTGAGCCACTGTGCCTGGCCNNNNNNNN
chr6	chr6	31	GTGAGCCACTGTGCCCAGCCATGAGTAT	2	144290631	144290659	GTGAGCCACTGTGCCTGGCCNNNNNNNN
chr5	chr5	31	GTGAGCCACCGTGCCCAGCCAAGGGTTC	3	56362014	56362042	GTGAGCCACTGTGCCTGGCCNNNNNNNN
chr5	chr5	31	GTGAGCCACCGTGCCTGGCCTAGGGTTG	1	179963278	179963306	GTGAGCCACTGTGCCTGGCCNNNNNNNN
chr3	chr3	31	GTGAGCCACTGCGCCTGGTCTCGGGGCT	2	42232404	42232432	GTGAGCCACTGTGCCTGGCCNNNNNNNN
chr22	chr22	31	GTGAGCCACCGTGCCCAGCCATGAGTTA	3	30010142	30010170	GTGAGCCACTGTGCCTGGCCNNNNNNNN
chr2	chr2	31	GTGAGCCACCGTGCCTGGCCAAGAGTTT	1	176798735	176798763	GTGAGCCACTGTGCCTGGCCNNNNNNNN
chr17	chr17	31	GTGAGCCACTGCGCCTGGCCTGGAGTTC	1	65807747	65807775	GTGAGCCACTGTGCCTGGCCNNNNNNNN
chr14	chr14	31	GTGAGCCACTGTGCCTGGCCCTGGATCT	0	68373805	68373833	GTGAGCCACTGTGCCTGGCCNNNNNNNN
chr12	chr12	31	GTGAGCCACCGTGCCTGGCCCTGAGTTA	1	69280122	69280150	GTGAGCCACTGTGCCTGGCCNNNNNNNN
chr12	chr12	31	GTGAGCCACTGTGCCTGGCCTGGAAACC	0	22815611	22815639	GTGAGCCACTGTGCCTGGCCNNNNNNNN
chr11	chr11	31	GTGAGCCACCGTGCCTGGCCAAGAATTG	1	85314669	85314697	GTGAGCCACTGTGCCTGGCCNNNNNNNN
chr11	chr11	31	GTGAGCCACTGTGCCCGGCCTGGAATCA	1	57723960	57723988	GTGAGCCACTGTGCCTGGCCNNNNNNNN
chrX	chrX	30	GTGAGCCACCGTGCCTGGCCAAGAGTAC	1	6316567	6316595	GTGAGCCACTGTGCCTGGCCNNNNNNNN
chrX	chrX	30	GTGAGCCACTGTGCCCAGCCTGGGGTTT	2	19822000	19822028	GTGAGCCACTGTGCCTGGCCNNNNNNNN
chr7	chr7	30	GTGAGCCACTGTGCCTGGCCTAGAATGG	0	100717380	100717408	GTGAGCCACTGTGCCTGGCCNNNNNNNN
chr6	chr6	30	GTGAGCCACTGTGCCTGGCCGAGAATCA	0	17314047	17314075	GTGAGCCACTGTGCCTGGCCNNNNNNNN
chr6	chr6	30	GTGAGCCACTGTGCCTGGCCAAGAATGT	0	133213193	133213221	GTGAGCCACTGTGCCTGGCCNNNNNNNN
chr3	chr3	30	GTGAGCCACTGCGCCTGGCCAGGAATAT	1	42064360	42064388	GTGAGCCACTGTGCCTGGCCNNNNNNNN
chr3	chr3	30	GTGAGCCACTGTGCCTGGCCTGGGATTT	0	141717157	141717185	GTGAGCCACTGTGCCTGGCCNNNNNNNN
chr3	chr3	30	GTGAGCCACTGCGCCTGGCCTGGAGTCG	1	125538648	125538676	GTGAGCCACTGTGCCTGGCCNNNNNNNN
chr2	chr2	30	GTGAGCCACTGTGCCTGGCCAGGAATAA	0	62049275	62049303	GTGAGCCACTGTGCCTGGCCNNNNNNNN
chr2	chr2	30	GTGAGCCACTGTGCCTGGCCCAGAGTGA	0	62038920	62038948	GTGAGCCACTGTGCCTGGCCNNNNNNNN
chr2	chr2	30	GTGAGCCACTGTGCCTGGCCATGAATCC	0	47488534	47488562	GTGAGCCACTGTGCCTGGCCNNNNNNNN
chr2	chr2	30	ATGAGCCACTGTGCCTGGCCTAGGATTT	1	130083350	130083378	GTGAGCCACTGTGCCTGGCCNNNNNNNN
chr21	chr21	30	ATGAGCCACTGTGCCTGGCCCTGAATTT	1	24323067	24323095	GTGAGCCACTGTGCCTGGCCNNNNNNNN
chr20	chr20	30	GTGAGCCACCGCGCCTGGCCAAGGGTCT	2	37051446	37051474	GTGAGCCACTGTGCCTGGCCNNNNNNNN
chr19	chr19	30	GTGAGCCACTGTGCCCAGCCAAGAGTAT	2	46412523	46412551	GTGAGCCACTGTGCCTGGCCNNNNNNNN
chr18	chr18	30	ATGAGCCACTGTGCCTGGCCAGGAATCA	1	61958597	61958625	GTGAGCCACTGTGCCTGGCCNNNNNNNN
chr17	chr17	30	GTGAGCCACTGTGCCCGGCCTAGAGTTA	1	74451217	74451245	GTGAGCCACTGTGCCTGGCCNNNNNNNN
chr16	chr16	30	GTGAGCCACTGTGCCTGGCCTTGGGATT	0	74637898	74637926	GTGAGCCACTGTGCCTGGCCNNNNNNNN
chr16	chr16	30	GTGAGCCACTGCGCCTGGCCAAGGGTTT	1	74613329	74613357	GTGAGCCACTGTGCCTGGCCNNNNNNNN
chr1	chr1	30	GTGAGCCACCGTGCCTGGCCTTGAATAT	1	61499486	61499514	GTGAGCCACTGTGCCTGGCCNNNNNNNN
chr9	chr9	29	GTGAGCCACTGTGCCTGGCCGAGAGATT	0	81822105	81822133	GTGAGCCACTGTGCCTGGCCNNNNNNNN
chr7	chr7	29	GTGAGCCACTGCACCTGGCCAGGAATGT	2	148894840	148894868	GTGAGCCACTGTGCCTGGCCNNNNNNNN
chr7	chr7	29	GTGAGCCACTGTGCCTGGCCAGGGATAG	0	138285052	138285080	GTGAGCCACTGTGCCTGGCCNNNNNNNN
chr6	chr6	29	GTGAGCCACTGTGCCTGGCCATGAGTGA	0	107418704	107418732	GTGAGCCACTGTGCCTGGCCNNNNNNNN
chr5	chr5	29	GTGAGCCACTGTGCCTGGCCTGGGGTGT	0	133770516	133770544	GTGAGCCACTGTGCCTGGCCNNNNNNNN
chr4	chr4	29	GTGAGCCACTGTGCCTGGCCTGGGGTCT	0	55484852	55484880	GTGAGCCACTGTGCCTGGCCNNNNNNNN
chr4	chr4	29	GTGAGCCACTGCGCCTGGCCGAGAGTGC	1	185507482	185507510	GTGAGCCACTGTGCCTGGCCNNNNNNNN
chr2	chr2	29	GTGAGCCACTGTGCCCGGCCTGGAATTT	1	49422934	49422962	GTGAGCCACTGTGCCTGGCCNNNNNNNN
chr2	chr2	29	ATGAGCCACTGTGCCTGGCCATGAGATC	1	197507747	197507775	GTGAGCCACTGTGCCTGGCCNNNNNNNN
chr2	chr2	29	GTGAGCCACTGTGCCCAGCCCAGGGTGG	2	114458551	114458579	GTGAGCCACTGTGCCTGGCCNNNNNNNN
chr2	chr2	29	GTGAGCCACTGTGCCTGGCCTAGGAACT	0	110475200	110475228	GTGAGCCACTGTGCCTGGCCNNNNNNNN
chr19	chr19	29	ATGAGCCACTGTGCCTGGCCTCGAATTC	1	7163798	7163826	GTGAGCCACTGTGCCTGGCCNNNNNNNN
chr19	chr19	29	GTGAGCCACTGTGCCCAGCCTCGAGTCA	2	40879603	40879631	GTGAGCCACTGTGCCTGGCCNNNNNNNN
chr19	chr19	29	GTGAGCCACTATGCCTGGCCCAGAGTCC	1	15431754	15431782	GTGAGCCACTGTGCCTGGCCNNNNNNNN
chr17	chr17	29	GTGAGCCACTGTGCCTGGCCACAGGTCA	0	60805665	60805693	GTGAGCCACTGTGCCTGGCCNNNNNNNN
chr17	chr17	29	GTGAGCCACTGCGCCTGGCCAAGGATTT	1	53076056	53076084	GTGAGCCACTGTGCCTGGCCNNNNNNNN
chr1	chr1	29	GTGAGCCACTGTGCCCAGCCAGGGATTT	2	60206812	60206840	GTGAGCCACTGTGCCTGGCCNNNNNNNN
chr14	chr14	29	GTGAGCCACTGTGCCTGGCCAACAGTTT	0	36166832	36166860	GTGAGCCACTGTGCCTGGCCNNNNNNNN
chr13	chr13	29	GTGAGCCACTGTGCCTGGCCCAGAACAG	0	70414635	70414663	GTGAGCCACTGTGCCTGGCCNNNNNNNN
chr12	chr12	29	GTGAGCCACCGTGCCTGGCCAGGAGTAT	1	57827575	57827603	GTGAGCCACTGTGCCTGGCCNNNNNNNN
chr1	chr1	29	GTGAGCCACTGTGCCCGGCCGTGGGATT	1	213320047	213320075	GTGAGCCACTGTGCCTGGCCNNNNNNNN
chr12	chr12	29	ATGAGCCACTGTGCCTGGCCGAGAGTTT	1	122182109	122182137	GTGAGCCACTGTGCCTGGCCNNNNNNNN
chr1	chr1	29	GTGAGCCACTGTGCCCAGCCATGAGTCT	2	117528030	117528058	GTGAGCCACTGTGCCTGGCCNNNNNNNN
chr10	chr10	29	ATGAGCCACTGTGCCTGGCCCAGGGTGA	1	91488547	91488575	GTGAGCCACTGTGCCTGGCCNNNNNNNN
chr10	chr10	29	ATGAGCCACTGTGCCTGGCCAAGGATTA	1	70902229	70902257	GTGAGCCACTGTGCCTGGCCNNNNNNNN
chr10	chr10	29	GTGAGCCACTGTGCCTGGTCAAGAGTTG	1	100813772	100813800	GTGAGCCACTGTGCCTGGCCNNNNNNNN
chr9	chr9	28	GTGAGCCACTGTGCCTGGCCAGGAATTT	0	71529341	71529369	GTGAGCCACTGTGCCTGGCCNNNNNNNN
chr9	chr9	28	GTGAGCCACTGTGCCTGGCCTAGAAACA	0	128117662	128117690	GTGAGCCACTGTGCCTGGCCNNNNNNNN
chr8	chr8	28	GTGAGCCACTGTGCCTGGCCTGGGGTTC	0	119557415	119557443	GTGAGCCACTGTGCCTGGCCNNNNNNNN
chr7	chr7	28	GTGAGCCACTGTGCCTGGCCTGGAAATG	0	5624851	5624879	GTGAGCCACTGTGCCTGGCCNNNNNNNN
chr7	chr7	28	GTGAGCCACTGTGCCTGGCCTAGAGCCA	0	36332395	36332423	GTGAGCCACTGTGCCTGGCCNNNNNNNN
chr6	chr6	28	GTGAGCCACAGTGCCCAGCCAAGAGTCA	3	121837912	121837940	GTGAGCCACTGTGCCTGGCCNNNNNNNN
chr6	chr6	28	GTGAGCCACTGTGCCCGGCCTAGAGTCT	1	113859337	113859365	GTGAGCCACTGTGCCTGGCCNNNNNNNN
chr5	chr5	28	ATGAGCCACTGTGCCCGGCCGAGAATTG	2	138412529	138412557	GTGAGCCACTGTGCCTGGCCNNNNNNNN
chr4	chr4	28	GTGAGCCACTGTGCCTGGCCTTGAGTTT	0	91197776	91197804	GTGAGCCACTGTGCCTGGCCNNNNNNNN
chr4	chr4	28	GTGAGCCACTGTGCCTGGCCATGAATCA	0	184008278	184008306	GTGAGCCACTGTGCCTGGCCNNNNNNNN
chr4	chr4	28	GTGAGCCACTGTGCCTGGCCGAGGGTGG	0	101536011	101536039	GTGAGCCACTGTGCCTGGCCNNNNNNNN
chr3	chr3	28	GTGAGCCACCATGCCTGGCCAAGAGTTC	2	106777097	106777125	GTGAGCCACTGTGCCTGGCCNNNNNNNN
chr2	chr2	28	GTGAGCCACTGTGCCTGGCCTGGGGAGC	0	71440160	71440188	GTGAGCCACTGTGCCTGGCCNNNNNNNN
chr2	chr2	28	GTGAGCCACTGTGCCTGGCCCAGAGCTC	0	54230676	54230704	GTGAGCCACTGTGCCTGGCCNNNNNNNN
chr2	chr2	28	GTGAGCCACTGTGCCCAGCCAAGAGTGA	2	233484299	233484327	GTGAGCCACTGTGCCTGGCCNNNNNNNN
chr22	chr22	28	GTGAGCCACTGTGCCTGGCCGGGAGGTC	0	31548412	31548440	GTGAGCCACTGTGCCTGGCCNNNNNNNN
chr21	chr21	28	GTGAGCCACTGCGCCTGGCCTAGAGTTT	1	47158447	47158475	GTGAGCCACTGTGCCTGGCCNNNNNNNN
chr19	chr19	28	GTGAGCCATTGTGCCTGGCCCAGGGTGC	1	23768637	23768665	GTGAGCCACTGTGCCTGGCCNNNNNNNN
chr19	chr19	28	GTGAGCCACCATGCCCAGCCAAGAGTTC	4	10478011	10478039	GTGAGCCACTGTGCCTGGCCNNNNNNNN
chr17	chr17	28	GTGAGCCACTGTGCCTGGCCAGGAAGCC	0	72158526	72158554	GTGAGCCACTGTGCCTGGCCNNNNNNNN
chr17	chr17	28	GTGAGCCACCATGCCTGGCCCAGAATCA	2	64344339	64344367	GTGAGCCACTGTGCCTGGCCNNNNNNNN
chr17	chr17	28	GTGAGCCACTGCGCCTGGCCTAGAGTGG	1	62697747	62697775	GTGAGCCACTGTGCCTGGCCNNNNNNNN
chr17	chr17	28	GTGAGCCACTGTGCCTGGCCCAGAAATG	0	45074426	45074454	GTGAGCCACTGTGCCTGGCCNNNNNNNN
chr15	chr15	28	GTGAGCCACTGTGCCCAGCCTGGAATTT	2	81477910	81477938	GTGAGCCACTGTGCCTGGCCNNNNNNNN
chr15	chr15	28	GTGAGCCATTGTGCCTGGCCATGAATCC	1	22506712	22506740	GTGAGCCACTGTGCCTGGCCNNNNNNNN
chr14	chr14	28	ATGAGCCACTGTGCCTGGCCAGGAGTTT	1	82179263	82179291	GTGAGCCACTGTGCCTGGCCNNNNNNNN
chr14	chr14	28	GTGAGCCACTGCGCCTGGCCGGGAATTT	1	100821837	100821865	GTGAGCCACTGTGCCTGGCCNNNNNNNN
chr11	chr11	28	GTGAGCCACTGTGCCTGGCCCAGGGTGG	0	78472563	78472591	GTGAGCCACTGTGCCTGGCCNNNNNNNN
chr1	chr1	28	GTGAGCCACTGTGCCTGGCCGGGGGATT	0	119800715	119800743	GTGAGCCACTGTGCCTGGCCNNNNNNNN
chr10	chr10	28	ATGAGCCACTGTGCCTGGCCTCGGATCT	1	111225496	111225524	GTGAGCCACTGTGCCTGGCCNNNNNNNN
chrX	chrX	27	GTGAGCCACTGTGCCTGGCCTGGGGGTC	0	40770281	40770309	GTGAGCCACTGTGCCTGGCCNNNNNNNN
chrX	chrX	27	ATGAGCCACTGTGCCTGGCCTGGAATGG	1	151225328	151225356	GTGAGCCACTGTGCCTGGCCNNNNNNNN
chr8	chr8	27	GTGAGCCACTGCGCCTGGCCTGGAATTT	1	103977504	103977532	GTGAGCCACTGTGCCTGGCCNNNNNNNN
chr7	chr7	27	GTGAGCCACTGTGCCTGGTCTGGAGTTT	1	23646403	23646431	GTGAGCCACTGTGCCTGGCCNNNNNNNN
chr6	chr6	27	GTGAGCCACTGCGCCTGGCCAAGGATGG	1	57172315	57172343	GTGAGCCACTGTGCCTGGCCNNNNNNNN
chr5	chr5	27	ATGAGCCACTGTGCCTGGCCAAGAGTAG	1	65084372	65084400	GTGAGCCACTGTGCCTGGCCNNNNNNNN
chr5	chr5	27	GTGAGCCACTGTGCCTGGCCTAGAATTT	0	60033664	60033692	GTGAGCCACTGTGCCTGGCCNNNNNNNN
chr4_GL000194_random	chr4_GL000194_random	27	GTGAGCCACTGTGCCTGGCCTGGAATTT	0	93386	93414	GTGAGCCACTGTGCCTGGCCNNNNNNNN
chr4	chr4	27	GTAAGCCACTGTGCCTGGCCTGGAGTTT	1	87471561	87471589	GTGAGCCACTGTGCCTGGCCNNNNNNNN
chr2	chr2	27	GTGAACCACTGTGCCTGGCCAGGAGTTG	1	224686816	224686844	GTGAGCCACTGTGCCTGGCCNNNNNNNN
chr20	chr20	27	GTGAGTCACTGTGCCTGGCCAAGAATAA	1	57535660	57535688	GTGAGCCACTGTGCCTGGCCNNNNNNNN
chr19	chr19	27	GTGAGCCACTGTGCCTGGCCTGGATTCA	0	2312374	2312402	GTGAGCCACTGTGCCTGGCCNNNNNNNN
chr19	chr19	27	GTGAGCCACTGTGTCTGGCCTGGAGTAG	1	17704158	17704186	GTGAGCCACTGTGCCTGGCCNNNNNNNN
chr17	chr17	27	GTGAGCCACTGTGTTTGGCCGTGAGTTA	2	78149938	78149966	GTGAGCCACTGTGCCTGGCCNNNNNNNN
chr16	chr16	27	GTGAGCCACTGTGCCTGGCCAGGGGGAT	0	85166687	85166715	GTGAGCCACTGTGCCTGGCCNNNNNNNN
chr16	chr16	27	GTGAGCCACTGCGCCTAGCCAGGAGTAT	2	78134427	78134455	GTGAGCCACTGTGCCTGGCCNNNNNNNN
chr15	chr15	27	ATGAGCCACTGTGCCTGGCCAGGAAGCA	1	66040090	66040118	GTGAGCCACTGTGCCTGGCCNNNNNNNN
chr14	chr14	27	GTGAGCCACTGTGCCTGGCCGAGAATAG	0	93843719	93843747	GTGAGCCACTGTGCCTGGCCNNNNNNNN
chr13	chr13	27	GTGAGCCACTGTGCCTGGCCAGGAGCTC	0	100975849	100975877	GTGAGCCACTGTGCCTGGCCNNNNNNNN
chr1	chr1	27	ATGAGCCACTGTGCCCAGCCAAGAGTGA	3	27452361	27452389	GTGAGCCACTGTGCCTGGCCNNNNNNNN
chr12	chr12	27	GTGAGCCACTGTGCCTGGCCAGGGATAA	0	24797292	24797320	GTGAGCCACTGTGCCTGGCCNNNNNNNN
chr1	chr1	27	GTGAGCCACTGTGCCTGGCCTAGAGTAA	0	160559899	160559927	GTGAGCCACTGTGCCTGGCCNNNNNNNN
chrX	chrX	26	GTGAGCCACTGTGCCTGGCCAAGAATTA	0	70554857	70554885	GTGAGCCACTGTGCCTGGCCNNNNNNNN
chrX	chrX	26	GTGAGCCACTGTGCCTGGCCTGGAATTG	0	62641944	62641972	GTGAGCCACTGTGCCTGGCCNNNNNNNN
chr8	chr8	26	GTGAGCCACCGCGCCTGGCCAGGGGTGG	2	87583171	87583199	GTGAGCCACTGTGCCTGGCCNNNNNNNN
chr7	chr7	26	GTGAGCTACTGTGCCTGGCCAAGAGTAA	1	107730387	107730415	GTGAGCCACTGTGCCTGGCCNNNNNNNN
chr7	chr7	26	GTGAGCCACTGTGCCTGGCCCAGAATTT	0	100897761	100897789	GTGAGCCACTGTGCCTGGCCNNNNNNNN
chr6	chr6	26	GTGAGCCATTGTGCCTGGCCTAGAACCT	1	20141897	20141925	GTGAGCCACTGTGCCTGGCCNNNNNNNN
chr6	chr6	26	ATGAGCCACTGCGCCTGGCCAGGAGTCG	2	134229121	134229149	GTGAGCCACTGTGCCTGGCCNNNNNNNN
chr5	chr5	26	ATGAGCCACTGCGCCTGGCCGAGAGTTA	2	179274447	179274475	GTGAGCCACTGTGCCTGGCCNNNNNNNN
chr4	chr4	26	GTGAGCCACCGTGCCTGGCCCAGAGTTT	1	151931742	151931770	GTGAGCCACTGTGCCTGGCCNNNNNNNN
chr4	chr4	26	GTAAGCCACTGTGCCTGGCCTAGAGTTT	1	122725448	122725476	GTGAGCCACTGTGCCTGGCCNNNNNNNN
chr4	chr4	26	GTGAGCCACCGTGCCTGGCCTAGAATGC	1	114156871	114156899	GTGAGCCACTGTGCCTGGCCNNNNNNNN
chr20	chr20	26	GTGAGCCACTGTGCCTGGCCTAGAGTCA	0	19815441	19815469	GTGAGCCACTGTGCCTGGCCNNNNNNNN
chr1	chr1	26	GTGAGCCACAGTGCCTGGCCAAGAGTAA	1	96982399	96982427	GTGAGCCACTGTGCCTGGCCNNNNNNNN
chr19	chr19	26	GTGAGCCACTGTGCCCAGCCTAGAGTTG	2	4136229	4136257	GTGAGCCACTGTGCCTGGCCNNNNNNNN
chr19	chr19	26	GTGAGCCACTGCGCCTGGCCAGGAGTTT	1	36187711	36187739	GTGAGCCACTGTGCCTGGCCNNNNNNNN
chr1	chr1	26	GTGAGCCACTGTGCCTGGCCAGGGGTCG	0	9001789	9001817	GTGAGCCACTGTGCCTGGCCNNNNNNNN
chr17	chr17	26	GTGAGCCACTGTGCCTGGCCTTGAGTAG	0	80386140	80386168	GTGAGCCACTGTGCCTGGCCNNNNNNNN
chr17	chr17	26	GTGAGCCACTGTGCCTGGCCAGGAGCAG	0	74756891	74756919	GTGAGCCACTGTGCCTGGCCNNNNNNNN
chr14	chr14	26	GTGAGCCACTGTGCCTGGCCTAGAATTC	0	49309562	49309590	GTGAGCCACTGTGCCTGGCCNNNNNNNN
chr1	chr1	26	GTGAGCCACTGTGCCTGGCCTAGAATAG	0	229608180	229608208	GTGAGCCACTGTGCCTGGCCNNNNNNNN
chr12	chr12	26	GTGAGCCACTATGCCTGGCCTAGAATCT	1	112644619	112644647	GTGAGCCACTGTGCCTGGCCNNNNNNNN
chr11	chr11	26	GTGAGCCACCGTGCCTGGCCAAGAGTCA	1	75099357	75099385	GTGAGCCACTGTGCCTGGCCNNNNNNNN
chr11	chr11	26	GTGAGCCACTGTGCCTGGCCCAGAGTAT	0	18661334	18661362	GTGAGCCACTGTGCCTGGCCNNNNNNNN
chr1	chr1	26	GTGAGCCACTGCGCCTGGCCAAGAATCT	1	112675747	112675775	GTGAGCCACTGTGCCTGGCCNNNNNNNN
chr10	chr10	26	ATGAGCCACTGTGCCTGGCCTGGAGAGG	1	23122253	23122281	GTGAGCCACTGTGCCTGGCCNNNNNNNN
chrX	chrX	25	GTGAGCCACTGTGCCTGGCCCAGAGGCA	0	106511951	106511979	GTGAGCCACTGTGCCTGGCCNNNNNNNN
chr9	chr9	25	GTGAGCCACCGTGCCCAGCCAAGAGTTC	3	79683614	79683642	GTGAGCCACTGTGCCTGGCCNNNNNNNN
chr9	chr9	25	GTGAGCCACTGTGCCTGGCCATGAATAT	0	78603611	78603639	GTGAGCCACTGTGCCTGGCCNNNNNNNN
chr9	chr9	25	GTGAGCCACTGCACCTGGCCAGGAGTCA	2	117153838	117153866	GTGAGCCACTGTGCCTGGCCNNNNNNNN
chr8	chr8	25	GTGAGCCACTGTGCCTGGCCATGAGTTT	0	64503889	64503917	GTGAGCCACTGTGCCTGGCCNNNNNNNN
chr7	chr7	25	GTGAGCCACTGTGCCTGGCCAGGATTAT	0	150119548	150119576	GTGAGCCACTGTGCCTGGCCNNNNNNNN
chr6	chr6	25	GTGAGCCACCGTGCCCGGCCGAGAGTCA	2	53453197	53453225	GTGAGCCACTGTGCCTGGCCNNNNNNNN
chr6	chr6	25	GTGAGCCACTGTGCCTGGCCCCGAGATG	0	41251158	41251186	GTGAGCCACTGTGCCTGGCCNNNNNNNN
chr5	chr5	25	GTGAGCCACCGTGCCTGGCCAAGAGTGT	1	177599157	177599185	GTGAGCCACTGTGCCTGGCCNNNNNNNN
chr5	chr5	25	ATGAGCCACTGTGCCCGGCCAAGAGTTC	2	145469806	145469834	GTGAGCCACTGTGCCTGGCCNNNNNNNN
chr3	chr3	25	GTGAGCCACTGTGCCTGGCCGGGGATCC	0	86393880	86393908	GTGAGCCACTGTGCCTGGCCNNNNNNNN
chr3	chr3	25	GTGAGCCACTGTGCCTGGCCGAGGATCA	0	71421452	71421480	GTGAGCCACTGTGCCTGGCCNNNNNNNN
chr3	chr3	25	ATGAGCCACTGTGCCTGGCCAGGAGTTA	1	6133332	6133360	GTGAGCCACTGTGCCTGGCCNNNNNNNN
chr3	chr3	25	GTGAGCCACTGCGCCTGGCCGGGAGTCT	1	47650696	47650724	GTGAGCCACTGTGCCTGGCCNNNNNNNN
chr3	chr3	25	GTGAGCCACTGTGCCCAGCCTAGAGTAG	2	15809078	15809106	GTGAGCCACTGTGCCTGGCCNNNNNNNN
chr2	chr2	25	GTGAGCCACTGCGCCTGGCCGTGAGTGT	1	74713104	74713132	GTGAGCCACTGTGCCTGGCCNNNNNNNN
chr2	chr2	25	GTGAGCCACTGCGCCTGGCCAGGAATTC	1	239900977	239901005	GTGAGCCACTGTGCCTGGCCNNNNNNNN
chr2	chr2	25	GTGAGCCACTGTGCCTGGCCAAGAACTA	0	198588859	198588887	GTGAGCCACTGTGCCTGGCCNNNNNNNN
chr20	chr20	25	GTGAGCCACTGCGCCTGGCCCTGAATTA	1	30189437	30189465	GTGAGCCACTGTGCCTGGCCNNNNNNNN
chr19	chr19	25	GTGAGCCACTGCGCCTGGCCTGGAGTAC	1	5276513	5276541	GTGAGCCACTGTGCCTGGCCNNNNNNNN
chr1	chr1	25	GTGAGCCACCGTGCCTGGCCAAGGATCA	1	85985033	85985061	GTGAGCCACTGTGCCTGGCCNNNNNNNN
chr17	chr17	25	GTGAGCCACTGTGCCTGGCCTAGAAACA	0	48957540	48957568	GTGAGCCACTGTGCCTGGCCNNNNNNNN
chr17	chr17	25	ATGAGCCACTGTGCCTGGCCTGGAGTTT	1	3312542	3312570	GTGAGCCACTGTGCCTGGCCNNNNNNNN
chr16	chr16	25	GTGAGCCACTGTGCCCGGCCTAGGGTGA	1	87643149	87643177	GTGAGCCACTGTGCCTGGCCNNNNNNNN
chr16	chr16	25	ATGAGCCACCGTGCCTGGCCTGGAGTCT	2	85017906	85017934	GTGAGCCACTGTGCCTGGCCNNNNNNNN
chr16	chr16	25	GTGAGCCACTGTGCCTGGCCCAGAATTG	0	78108427	78108455	GTGAGCCACTGTGCCTGGCCNNNNNNNN
chr16	chr16	25	GTGAGCCACTGTGCCCAGCCTGGAGTGT	2	57337239	57337267	GTGAGCCACTGTGCCTGGCCNNNNNNNN
chr16	chr16	25	ATGAGCCACTGTGCCCAGCCTGGAGTTT	3	46684830	46684858	GTGAGCCACTGTGCCTGGCCNNNNNNNN
chr16	chr16	25	GTGAGCCACTGTGCCTGGCCCCGGGTTG	0	15165334	15165362	GTGAGCCACTGTGCCTGGCCNNNNNNNN
chr15	chr15	25	GTGAGCCACCGTGCCCGGCCTGGAATTG	2	78862054	78862082	GTGAGCCACTGTGCCTGGCCNNNNNNNN
chr15	chr15	25	GTGAGCCACTGCGCCTGGCCAAGAGTTC	1	65927532	65927560	GTGAGCCACTGTGCCTGGCCNNNNNNNN
chr14	chr14	25	GTGAGCCACTGTGCCTGGCCCAGAGTCT	0	55412536	55412564	GTGAGCCACTGTGCCTGGCCNNNNNNNN
chr12	chr12	25	GTGAGCCACTGTGCCTGGCCAAGAAACA	0	72827874	72827902	GTGAGCCACTGTGCCTGGCCNNNNNNNN
chr1	chr1	25	GTGAGCCACTGTGCCCGGCCATGAGTAA	1	234641981	234642009	GTGAGCCACTGTGCCTGGCCNNNNNNNN
chr12	chr12	25	GTGAGCCATTGTGCCTGGCTAGGAGTTG	2	118527829	118527857	GTGAGCCACTGTGCCTGGCCNNNNNNNN
chr1	chr1	25	GTGAGCCACTGCGCCCAGCCTGGGGTGA	3	150289336	150289364	GTGAGCCACTGTGCCTGGCCNNNNNNNN
chr11	chr11	25	ATGAGCCACTGTGCCTGGCCGTGGATTG	1	133986966	133986994	GTGAGCCACTGTGCCTGGCCNNNNNNNN
chr10	chr10	25	GTGAGCCACTGCGCCTGGCCTGGAGTTC	1	112088884	112088912	GTGAGCCACTGTGCCTGGCCNNNNNNNN
chr9	chr9	24	GTGAGCCACTGTGCCCAGCCGAGAATCA	2	18108477	18108505	GTGAGCCACTGTGCCTGGCCNNNNNNNN
chr8	chr8	24	GTGAGCCACTGTGCCTGGCCAGGAATTT	0	100002476	100002504	GTGAGCCACTGTGCCTGGCCNNNNNNNN
chr6	chr6	24	GTGAGCCACTGTGCCTGGCCAAGGATTA	0	87886755	87886783	GTGAGCCACTGTGCCTGGCCNNNNNNNN
chr5	chr5	24	GTGAGCCACTGCGCCTGGCCTGGAATCA	1	89913404	89913432	GTGAGCCACTGTGCCTGGCCNNNNNNNN
chr4	chr4	24	GTGAGCCACCGTGCCTGGCCTAGAGTGG	1	71663271	71663299	GTGAGCCACTGTGCCTGGCCNNNNNNNN
chr3	chr3	24	GTGAGCCACTGTGCCTGGCCAAGAAATT	0	72800271	72800299	GTGAGCCACTGTGCCTGGCCNNNNNNNN
chr3	chr3	24	ATGAGCCACTGTGCCTGGCCTAGAGTTA	1	11437630	11437658	GTGAGCCACTGTGCCTGGCCNNNNNNNN
chr2	chr2	24	ATGAGCCACTGTGCCCAGCCAAGAGTTA	3	62068064	62068092	GTGAGCCACTGTGCCTGGCCNNNNNNNN
chr2	chr2	24	GTGAGCCACTGTGCCTGGCCCCGAGTAG	0	32257638	32257666	GTGAGCCACTGTGCCTGGCCNNNNNNNN
chr2	chr2	24	GTGAGCCACTGTGCCCAGCCATGGGTGA	2	235310863	235310891	GTGAGCCACTGTGCCTGGCCNNNNNNNN
chr22	chr22	24	GTGAGCCACCGTGCCCAGCCAAGAGTTC	3	19604676	19604704	GTGAGCCACTGTGCCTGGCCNNNNNNNN
chr2	chr2	24	GTGAGCCACTGCGCCTGGCCGAGAATAG	1	116895055	116895083	GTGAGCCACTGTGCCTGGCCNNNNNNNN
chr17	chr17	24	ATGAGCCACTGTGCCTGGCCCAGAATTA	1	40400005	40400033	GTGAGCCACTGTGCCTGGCCNNNNNNNN
chr16	chr16	24	GTGAGCCACTGTGCCCGGCCTGGAATGG	1	84332666	84332694	GTGAGCCACTGTGCCTGGCCNNNNNNNN
chr15	chr15	24	GTGAGCCACCGTGCCTGGCCTAGGGTTT	1	83838263	83838291	GTGAGCCACTGTGCCTGGCCNNNNNNNN
chr15	chr15	24	GTGGGCCACTGTGCCTGGCCTAGGGTCA	1	49485126	49485154	GTGAGCCACTGTGCCTGGCCNNNNNNNN
chr14	chr14	24	GTGAGCCACTGTGCCTGGCCAAGAATAT	0	67813311	67813339	GTGAGCCACTGTGCCTGGCCNNNNNNNN
chr1	chr1	24	ATGAGCCACCGTGCCTGGCCTGGAGTAG	2	38402518	38402546	GTGAGCCACTGTGCCTGGCCNNNNNNNN
chr13	chr13	24	GTGAGCCACTGTGCCTGGCCAAGGACCC	0	70032995	70033023	GTGAGCCACTGTGCCTGGCCNNNNNNNN
chr13	chr13	24	GTGAGCCACTGTGCCTGGCCAAGAAGAC	0	61761409	61761437	GTGAGCCACTGTGCCTGGCCNNNNNNNN
chr12	chr12	24	ATGAGCCACTGTGCCTGGCCTGGAATGT	1	56696697	56696725	GTGAGCCACTGTGCCTGGCCNNNNNNNN
chr1	chr1	24	ATGAGCCACTGTGCCCAGCCAGGAGTTC	3	22068742	22068770	GTGAGCCACTGTGCCTGGCCNNNNNNNN
chr12	chr12	24	GTGAGCCACTGTGCCCGGCCTGGAATGT	1	100942826	100942854	GTGAGCCACTGTGCCTGGCCNNNNNNNN
chr1	chr1	24	GTGAACCACTGTGCCTGGCCAGGAATTG	1	178551894	178551922	GTGAGCCACTGTGCCTGGCCNNNNNNNN
chr1	chr1	24	ATGAGCCACTGTGCCTGGCCGAGAGTTT	1	16614288	16614316	GTGAGCCACTGTGCCTGGCCNNNNNNNN
chr11	chr11	24	GTGAGCCACTGTGCCTGGTCATGGATCT	1	64259761	64259789	GTGAGCCACTGTGCCTGGCCNNNNNNNN
chr11	chr11	24	GTGAGCCACTGTGCCCGGCCAAGAATCA	1	43445923	43445951	GTGAGCCACTGTGCCTGGCCNNNNNNNN
chr11	chr11	24	GTGAGCCACTGTGCCCGGCCAAGAGTTT	1	129918837	129918865	GTGAGCCACTGTGCCTGGCCNNNNNNNN
chrX	chrX	23	GTGAGCCACTGCGCCTGGCCAGGAATCT	1	92950922	92950950	GTGAGCCACTGTGCCTGGCCNNNNNNNN
chrX	chrX	23	GTGAGCCACTGTGCCTGGCCGAGAATGA	0	55052044	55052072	GTGAGCCACTGTGCCTGGCCNNNNNNNN
chr8	chr8	23	GTGAGCCACTGCGCCTGGCCAAGAGTAT	1	95769917	95769945	GTGAGCCACTGTGCCTGGCCNNNNNNNN
chr8	chr8	23	GTGAGCCACTGTGCCCGGCCCTGGGTTT	1	48507265	48507293	GTGAGCCACTGTGCCTGGCCNNNNNNNN
chr8	chr8	23	GTGAGCCACTGTGCCTGGCCATGAATTA	0	33464038	33464066	GTGAGCCACTGTGCCTGGCCNNNNNNNN
chr8	chr8	23	ATGAGCCACTGTGCCTGGCCAAGAGACA	1	121047266	121047294	GTGAGCCACTGTGCCTGGCCNNNNNNNN
chr6	chr6	23	GTGAACCACTGTGCCTGGCCTTGAATTG	1	49554283	49554311	GTGAGCCACTGTGCCTGGCCNNNNNNNN
chr6	chr6	23	GTGAGCCACTGTGCCCAGCCAAGAATCT	2	147386748	147386776	GTGAGCCACTGTGCCTGGCCNNNNNNNN
chr5	chr5	23	GTGAGCCACTGCGCCCGGCCAGGAGTTG	2	126016846	126016874	GTGAGCCACTGTGCCTGGCCNNNNNNNN
chr4	chr4	23	GTGAGCCACTGCGCCTGGCCTAGAGTTG	1	9057266	9057294	GTGAGCCACTGTGCCTGGCCNNNNNNNN
chr4	chr4	23	TTGAGCCACTGTACCTGGCCGTGAATTT	2	69247617	69247645	GTGAGCCACTGTGCCTGGCCNNNNNNNN
chr4	chr4	23	ATGAGCCACTGTGCCTGGCCAAGAAATT	1	152324471	152324499	GTGAGCCACTGTGCCTGGCCNNNNNNNN
chr3	chr3	23	GTGAGCCACTGTGCCTGGCCAGGAATAA	0	72841646	72841674	GTGAGCCACTGTGCCTGGCCNNNNNNNN
chr2	chr2	23	GTGAGCCACCATGCCTGGCCAAGGGTGT	2	74103289	74103317	GTGAGCCACTGTGCCTGGCCNNNNNNNN
chr2	chr2	23	GTGAGCCACTGTGCCTGGCCTGGGGTTA	0	48761187	48761215	GTGAGCCACTGTGCCTGGCCNNNNNNNN
chr2	chr2	23	GTGAGCCACCGTGCCTGGCCAGGAGTGT	1	157348244	157348272	GTGAGCCACTGTGCCTGGCCNNNNNNNN
chr20	chr20	23	GTGAGCCACTGTGCCTGGCCTGGAATGG	0	19954142	19954170	GTGAGCCACTGTGCCTGGCCNNNNNNNN
chr19	chr19	23	GTGAGCCACTGTGCCTGGCCTAGAAGGA	0	9940136	9940164	GTGAGCCACTGTGCCTGGCCNNNNNNNN
chr19	chr19	23	GTGAGCCACCGTGCCTGGCCAAGGATTT	1	7903898	7903926	GTGAGCCACTGTGCCTGGCCNNNNNNNN
chr19	chr19	23	GTGAGCCCCTGTGCCTGGCCAAGGGTTG	1	34585126	34585154	GTGAGCCACTGTGCCTGGCCNNNNNNNN
chr19	chr19	23	GTAAGCCACTGTGCCTGGCCCAGAGTGC	1	30846913	30846941	GTGAGCCACTGTGCCTGGCCNNNNNNNN
chr1	chr1	23	ATGAGCCACTGTGCCTGGCCTAGAGATC	1	92238946	92238974	GTGAGCCACTGTGCCTGGCCNNNNNNNN
chr1	chr1	23	GTGAGCCACTGTGCCCAGCCCAGGGTTT	2	88375773	88375801	GTGAGCCACTGTGCCTGGCCNNNNNNNN
chr18	chr18	23	GTGAGCCACCGTGCCTGGCCACGAATTT	1	33564811	33564839	GTGAGCCACTGTGCCTGGCCNNNNNNNN
chr18	chr18	23	GTGAGCCACCGTGCCTGGCCATGGGCTC	1	29457595	29457623	GTGAGCCACTGTGCCTGGCCNNNNNNNN
chr17	chr17	23	ATGAGCCACTGTGCCTGGCCCAGAATTC	1	38376999	38377027	GTGAGCCACTGTGCCTGGCCNNNNNNNN
chr17	chr17	23	GTGAGCCACTGTGCCCGGCCAAGAATCT	1	2445322	2445350	GTGAGCCACTGTGCCTGGCCNNNNNNNN
chr16	chr16	23	TTGAGCCACTGTGCCCAGCCAAGAGTTT	3	69214405	69214433	GTGAGCCACTGTGCCTGGCCNNNNNNNN
chr16	chr16	23	GTGAGCCACTGTGCCTGGCCGGGAATCC	0	11179728	11179756	GTGAGCCACTGTGCCTGGCCNNNNNNNN
chr15	chr15	23	GTAAGCCACTGTGCCTGGCCAGGAATGC	1	63590688	63590716	GTGAGCCACTGTGCCTGGCCNNNNNNNN
chr14	chr14	23	GTGAGCCACTGTGCCTAGCCAGGAGCTA	1	90795753	90795781	GTGAGCCACTGTGCCTGGCCNNNNNNNN
chr14	chr14	23	ATGAGCCACTGTGCCCAGCCGAGAGTTT	3	103841625	103841653	GTGAGCCACTGTGCCTGGCCNNNNNNNN
chr12	chr12	23	GTGAGCCACTGTGCCTGGCCTGGGATCA	0	76959684	76959712	GTGAGCCACTGTGCCTGGCCNNNNNNNN
chr12	chr12	23	GTGAGCCACTGCGCCTGGCCTAGAAACA	1	50332812	50332840	GTGAGCCACTGTGCCTGGCCNNNNNNNN
chr1	chr1	23	ATGAGCCACTGTGCCTGGCCTAGAACTT	1	224506014	224506042	GTGAGCCACTGTGCCTGGCCNNNNNNNN
chr12	chr12	23	ATGAGCCATTGTGCCTGGCCAGGGGTGC	2	118271453	118271481	GTGAGCCACTGTGCCTGGCCNNNNNNNN
chr12	chr12	23	ATGAGCCACTGCGCCTGGCCAAGGGTTG	2	111750214	111750242	GTGAGCCACTGTGCCTGGCCNNNNNNNN
chr12	chr12	23	GTGAGTCACTGTGCCTGGCCTGGAATGT	1	104545091	104545119	GTGAGCCACTGTGCCTGGCCNNNNNNNN
chr1	chr1	23	GTGAGCCACTGTGCCTGGCCTAGGATAA	0	113141385	113141413	GTGAGCCACTGTGCCTGGCCNNNNNNNN
chr11	chr11	23	GTGAGCCACTGCGCCCGGCCAAGAGTTA	2	105069432	105069460	GTGAGCCACTGTGCCTGGCCNNNNNNNN
chr9	chr9	22	GTGAGCCACCGTGCCCGGCCGGGAGTGG	2	136284239	136284267	GTGAGCCACTGTGCCTGGCCNNNNNNNN
chr9	chr9	22	GTGAGCCACTGTGCCTGGCCTAGGATTT	0	133571530	133571558	GTGAGCCACTGTGCCTGGCCNNNNNNNN
chr8	chr8	22	GTAAGCCACTGTGCCTGGCCAAGAAATG	1	81293846	81293874	GTGAGCCACTGTGCCTGGCCNNNNNNNN
chr7	chr7	22	GTGAGCCACTGTGCCTGGCCTGGAATTC	0	98270580	98270608	GTGAGCCACTGTGCCTGGCCNNNNNNNN
chr7	chr7	22	GTGAGCCACTGTGCCTGGCCCGGAGTTT	0	130778456	130778484	GTGAGCCACTGTGCCTGGCCNNNNNNNN
chr5	chr5	22	GTGAGCCACTGTGCCTGGCCTAGAATAT	0	157278406	157278434	GTGAGCCACTGTGCCTGGCCNNNNNNNN
chr4	chr4	22	ATGAGCCACTGTGCCTGGCCTAGGATCT	1	74342433	74342461	GTGAGCCACTGTGCCTGGCCNNNNNNNN
chr3	chr3	22	GTGAGCCACTGCGCCTGGCCAAGAATTT	1	51215131	51215159	GTGAGCCACTGTGCCTGGCCNNNNNNNN
chr3	chr3	22	GTGAGCCACTGTGCCTGGCCGAGAGTAG	0	49869635	49869663	GTGAGCCACTGTGCCTGGCCNNNNNNNN
chr3	chr3	22	GTGAGCCACTGTGCCCGGCCCAGAGTTG	1	32013590	32013618	GTGAGCCACTGTGCCTGGCCNNNNNNNN
chr3	chr3	22	GTGAGCCACTGTGCCTGGCCGAGGATTA	0	179334040	179334068	GTGAGCCACTGTGCCTGGCCNNNNNNNN
chr3	chr3	22	GTGAGCCACTGTGCCTGGCCAAGAACAG	0	129391150	129391178	GTGAGCCACTGTGCCTGGCCNNNNNNNN
chr3	chr3	22	GTGAGCCACTGTGCCTGGCCTTGGGTTA	0	128768538	128768566	GTGAGCCACTGTGCCTGGCCNNNNNNNN
chr2	chr2	22	GTGAGCCGCTGTGCCTGGCCCAGAGTTT	1	39316977	39317005	GTGAGCCACTGTGCCTGGCCNNNNNNNN
chr22	chr22	22	ATGAACCACTGTGCCTGGCCAAGAATGA	2	30426953	30426981	GTGAGCCACTGTGCCTGGCCNNNNNNNN
chr22	chr22	22	GTGAGCCACTGTGCCCAGCCTGGAGGCA	2	26975100	26975128	GTGAGCCACTGTGCCTGGCCNNNNNNNN
chr2	chr2	22	ATGAGCCACTGTGCCTGGCCTAGAATTT	1	225529974	225530002	GTGAGCCACTGTGCCTGGCCNNNNNNNN
chr20	chr20	22	GTGAGCCACCGTGCCTGGCCAGGAATTT	1	48373405	48373433	GTGAGCCACTGTGCCTGGCCNNNNNNNN
chr19	chr19	22	GTGAGCCACTGTGCCCGGCCACGGATCC	1	7220579	7220607	GTGAGCCACTGTGCCTGGCCNNNNNNNN
chr19	chr19	22	GTGAGCCACTGTGCCCGGCCTAGAGTAG	1	33024301	33024329	GTGAGCCACTGTGCCTGGCCNNNNNNNN
chr19	chr19	22	GTGAGCCACCGTGCCCGGCCAAGAATCG	2	21225303	21225331	GTGAGCCACTGTGCCTGGCCNNNNNNNN
chr1	chr1	22	ATGAGCCACTGTGCCTGGCCCAGAGGGG	1	85397418	85397446	GTGAGCCACTGTGCCTGGCCNNNNNNNN
chr1	chr1	22	ATGAGCCACTGTGCCTGGCCTTGAGGTA	1	79555018	79555046	GTGAGCCACTGTGCCTGGCCNNNNNNNN
chr17	chr17	22	GTGAGCCACTGCGCCCAGCCAGGAGTCA	3	48428707	48428735	GTGAGCCACTGTGCCTGGCCNNNNNNNN
chr17	chr17	22	GTGAGCCACTGTGCCTGGCCCTGAATTT	0	11152166	11152194	GTGAGCCACTGTGCCTGGCCNNNNNNNN
chr1	chr1	22	ATGAGCCACTATGCCTGGCCCAGAGTTA	2	70742850	70742878	GTGAGCCACTGTGCCTGGCCNNNNNNNN
chr16	chr16	22	GTGAGCCACTGCGCCTGGCCTGGAATTT	1	89523716	89523744	GTGAGCCACTGTGCCTGGCCNNNNNNNN
chr16	chr16	22	GTGAGCCACTGTGCCCGGCCATGAGTCT	1	7931139	7931167	GTGAGCCACTGTGCCTGGCCNNNNNNNN
chr16	chr16	22	GTGAGCCATTGTGCCTGGCCTGGGATTT	1	67603366	67603394	GTGAGCCACTGTGCCTGGCCNNNNNNNN
chr16	chr16	22	GTGAGCCACTGTGCCTGGCCAGGAGGCT	0	53762955	53762983	GTGAGCCACTGTGCCTGGCCNNNNNNNN
chr14	chr14	22	ATGAGCCACTGTGCCTGGCCAGGAAGTC	1	90831112	90831140	GTGAGCCACTGTGCCTGGCCNNNNNNNN
chr14	chr14	22	GTGAGCCACCGTGCCTGGCCAAGAGTGC	1	53326814	53326842	GTGAGCCACTGTGCCTGGCCNNNNNNNN
chr14	chr14	22	GTGAGCCACCGTGCCTGGCCCAGAGTTT	1	42273343	42273371	GTGAGCCACTGTGCCTGGCCNNNNNNNN
chr1	chr1	22	GTGAGCCACTGTGCCCAGCCCAGAGTCC	2	27199512	27199540	GTGAGCCACTGTGCCTGGCCNNNNNNNN
chr1	chr1	22	GTGAGCCACTGTGCCTGGCCAGGAAGAT	0	240361248	240361276	GTGAGCCACTGTGCCTGGCCNNNNNNNN
chr1	chr1	22	ATGAGCCACTGTGCCTGGCCTAGAGCTT	1	201248935	201248963	GTGAGCCACTGTGCCTGGCCNNNNNNNN
chr11	chr11	22	GTGAGCCACTGCGCCTGGCCGGGAGTTT	1	82476573	82476601	GTGAGCCACTGTGCCTGGCCNNNNNNNN
chr1	chr1	22	GTGAGCCACTGTGCCTGGCCGGGAGAAA	0	174744730	174744758	GTGAGCCACTGTGCCTGGCCNNNNNNNN
chr11	chr11	22	ATGAGCCACCGTGCCTGGCCTGGAGTTG	2	128594119	128594147	GTGAGCCACTGTGCCTGGCCNNNNNNNN
chr10	chr10	22	GTGAGCCACTGTGCCCGGCCAGGAGTTA	1	20981069	20981097	GTGAGCCACTGTGCCTGGCCNNNNNNNN
chr10	chr10	22	GTGAGCCACTGTGCCCGGCCTTGAATTT	1	12316891	12316919	GTGAGCCACTGTGCCTGGCCNNNNNNNN
chr10	chr10	22	ATGAGCCACTGTGCCTGGCCGGGAGTGT	1	109786629	109786657	GTGAGCCACTGTGCCTGGCCNNNNNNNN
chr10	chr10	22	GTGAGCCACTGTGCCCAGCCCAGAGTGT	2	103927454	103927482	GTGAGCCACTGTGCCTGGCCNNNNNNNN
chr9	chr9	21	GTGAGACACTGTGCCTGGCCTTGAGTTC	1	33005712	33005740	GTGAGCCACTGTGCCTGGCCNNNNNNNN
chr9	chr9	21	GTGAGCCACTGTGCCCAGCCTAGAGTTA	2	100141544	100141572	GTGAGCCACTGTGCCTGGCCNNNNNNNN
chr8	chr8	21	GTGAGCCACTGTGCCCGGCCTGGGGTCT	1	131382256	131382284	GTGAGCCACTGTGCCTGGCCNNNNNNNN
chr7	chr7	21	GTGAGCCACTGTGCCCGGCCAGGAATAT	1	72255241	72255269	GTGAGCCACTGTGCCTGGCCNNNNNNNN
chr7	chr7	21	GTGAGCCACTGTGCCTGGCCCTGAATTC	0	121805995	121806023	GTGAGCCACTGTGCCTGGCCNNNNNNNN
chr6	chr6	21	GTGAGCCACTGTGCCCGGCCAAGAATCT	1	99622244	99622272	GTGAGCCACTGTGCCTGGCCNNNNNNNN
chr6	chr6	21	GTGAGCCACTGTGCCCAGCCAAGAGTCT	2	18898428	18898456	GTGAGCCACTGTGCCTGGCCNNNNNNNN
chr6	chr6	21	GTGAGCCACTGTGCCCGGCCAGGAGTAT	1	154805549	154805577	GTGAGCCACTGTGCCTGGCCNNNNNNNN
chr6	chr6	21	ATGAGCCACTGTGCCTGGCCATGAATAT	1	121931740	121931768	GTGAGCCACTGTGCCTGGCCNNNNNNNN
chr5	chr5	21	ATGAGCCACTGTGCCTGGACAAGGGTTG	2	40845248	40845276	GTGAGCCACTGTGCCTGGCCNNNNNNNN
chr5	chr5	21	GTGAGCCACTGCGCCCGGCCAAGAGTCA	2	141857036	141857064	GTGAGCCACTGTGCCTGGCCNNNNNNNN
chr4	chr4	21	GTGAGCCACTGCGCCTGGCCAGGAGCAG	1	90885270	90885298	GTGAGCCACTGTGCCTGGCCNNNNNNNN
chr4	chr4	21	GTGAGCCACTGCGCCCGGCCCAGAGTTG	2	140100124	140100152	GTGAGCCACTGTGCCTGGCCNNNNNNNN
chr4	chr4	21	GTGAGCCACTATGCCTGGCCTGGGATAC	1	11588607	11588635	GTGAGCCACTGTGCCTGGCCNNNNNNNN
chr3	chr3	21	GTGAGCCACTGTGCCTGGCCCTGAGATG	0	65928960	65928988	GTGAGCCACTGTGCCTGGCCNNNNNNNN
chr2	chr2	21	GTGAGCCACTGTGCCTGGCCAAGAATAA	0	74137051	74137079	GTGAGCCACTGTGCCTGGCCNNNNNNNN
chr22	chr22	21	GTGAGCCACTGCGCCTGGCCGTGAGTGA	1	38553752	38553780	GTGAGCCACTGTGCCTGGCCNNNNNNNN
chr2	chr2	21	GTGAGCCACCATGCCTGGCCAGGAGTTT	2	232561162	232561190	GTGAGCCACTGTGCCTGGCCNNNNNNNN
chr2	chr2	21	GTGAGCCACTGTGCCCAGCCTAGAGTTT	2	204685224	204685252	GTGAGCCACTGTGCCTGGCCNNNNNNNN
chr2	chr2	21	GTGAGCCACTGTGCCTGGTCAAGAGTGT	1	173047767	173047795	GTGAGCCACTGTGCCTGGCCNNNNNNNN
chr2	chr2	21	GTGAGCCACCGTGCCTGGCCAAGAGTGG	1	122023339	122023367	GTGAGCCACTGTGCCTGGCCNNNNNNNN
chr2	chr2	21	ATGAGCCACTGTGCCTGGCCAGGAATAC	1	119722173	119722201	GTGAGCCACTGTGCCTGGCCNNNNNNNN
chr20	chr20	21	ATGAGCCACTGTGCCTGGCCAAGAATTT	1	43077118	43077146	GTGAGCCACTGTGCCTGGCCNNNNNNNN
chr20	chr20	21	GTGAGCCACTGCGCCTGGCCCAGAATTT	1	25407440	25407468	GTGAGCCACTGTGCCTGGCCNNNNNNNN
chr19	chr19	21	GTGAGCCACTGTGCCAGGCCTGGAATTG	1	46218774	46218802	GTGAGCCACTGTGCCTGGCCNNNNNNNN
chr19	chr19	21	GTGAGCCACTGTGCCTGGCCTGGAATGA	0	41885095	41885123	GTGAGCCACTGTGCCTGGCCNNNNNNNN
chr19	chr19	21	GTGAGCCACTGTGCCTAGCCAGGAGCTG	1	38890894	38890922	GTGAGCCACTGTGCCTGGCCNNNNNNNN
chr1	chr1	21	GTGAGCCACCGTGCCTGGCCGAGAATTT	1	8841126	8841154	GTGAGCCACTGTGCCTGGCCNNNNNNNN
chr18	chr18	21	GTGAGCCACTGTGCCTGGCCAAGGAGAG	0	44473799	44473827	GTGAGCCACTGTGCCTGGCCNNNNNNNN
chr1	chr1	21	GTGAGCCACGGTGCCTGGCCAAGAGTTT	1	78185247	78185275	GTGAGCCACTGTGCCTGGCCNNNNNNNN
chr17	chr17	21	GTGAGCCACCGTGCCTGGCCGAGAAATC	1	75152366	75152394	GTGAGCCACTGTGCCTGGCCNNNNNNNN
chr17	chr17	21	ATGAGCCACTGTGCCTGGCCTTGAATTG	1	70834648	70834676	GTGAGCCACTGTGCCTGGCCNNNNNNNN
chr17	chr17	21	GTGAGCCACCGTGCCCAGCCAGGAATAA	3	26810355	26810383	GTGAGCCACTGTGCCTGGCCNNNNNNNN
chr16	chr16	21	GTGAGCCACTGTGCCCAGCCTGGAGTTT	2	5342903	5342931	GTGAGCCACTGTGCCTGGCCNNNNNNNN
chr14	chr14	21	ATGAGCCACTGTGCCCGGCCTTGGGTGC	2	75319272	75319300	GTGAGCCACTGTGCCTGGCCNNNNNNNN
chr14	chr14	21	GTGAGCCACTGTGCCTGGCCAAGAAACT	0	71672649	71672677	GTGAGCCACTGTGCCTGGCCNNNNNNNN
chr1	chr1	21	GTGAGCCACTGTGCCTGGCCTAGAATAT	0	35637067	35637095	GTGAGCCACTGTGCCTGGCCNNNNNNNN
chr1	chr1	21	GTGAGCCACTGTGCCTGGCCAGGATGAC	0	245131694	245131722	GTGAGCCACTGTGCCTGGCCNNNNNNNN
chr1	chr1	21	ATGAGCCACTGTGCCTGGCCATGGATGG	1	244843459	244843487	GTGAGCCACTGTGCCTGGCCNNNNNNNN
chr1	chr1	21	GTGAGCCACTGTGCCCAGCCAGGAATTA	2	214542035	214542063	GTGAGCCACTGTGCCTGGCCNNNNNNNN
chr1	chr1	21	ATGAGCCACTGTGCCTAGCCTTGAGTCT	2	214533143	214533171	GTGAGCCACTGTGCCTGGCCNNNNNNNN
chr12	chr12	21	GTGAGCCACTGTGCCTGGCCCAGAATTT	0	112051315	112051343	GTGAGCCACTGTGCCTGGCCNNNNNNNN
chr12	chr12	21	GTGAGCCACTGTGCCCAGCCAGGGGTGT	2	100589939	100589967	GTGAGCCACTGTGCCTGGCCNNNNNNNN
chr11	chr11	21	GTGAGCCACCGTGCCTGGCCAAGAGTCT	1	67151905	67151933	GTGAGCCACTGTGCCTGGCCNNNNNNNN
chr1	chr1	21	GTGAGCCACTGCGCCTGGCCTAGGATTT	1	15929195	15929223	GTGAGCCACTGTGCCTGGCCNNNNNNNN
chr11	chr11	21	ATGAGCCACTGTGCCTGGCCAAGAAGCA	1	35654780	35654808	GTGAGCCACTGTGCCTGGCCNNNNNNNN
chr10	chr10	21	ATGAGCCACTGTGCCCAGCCTGGAATAT	3	76062260	76062288	GTGAGCCACTGTGCCTGGCCNNNNNNNN
chr10	chr10	21	ATGAGCCACTGTGCCTGGCCGAGGGTGC	1	30532954	30532982	GTGAGCCACTGTGCCTGGCCNNNNNNNN
chr10	chr10	21	GTGAGCCACTGTGCCTGGCCAAGAAGTG	0	28517404	28517432	GTGAGCCACTGTGCCTGGCCNNNNNNNN
chr10	chr10	21	ATGAGCCACTGTGCCTGGCCTCGAATAC	1	101528033	101528061	GTGAGCCACTGTGCCTGGCCNNNNNNNN
chrX	chrX	20	ATGAGCCACTGTGCCTGGCCTTGAATAT	1	71268683	71268711	GTGAGCCACTGTGCCTGGCCNNNNNNNN
chrX	chrX	20	GTGAGCCACTGTGCCCGGCCCAGAGTCT	1	119026830	119026858	GTGAGCCACTGTGCCTGGCCNNNNNNNN
chr9	chr9	20	GTGAGCCACTGTGCCTGGCCAAGAAACT	0	99126307	99126335	GTGAGCCACTGTGCCTGGCCNNNNNNNN
chr9	chr9	20	GTGAGCCACTGTGCCTGGCCCTGGATAA	0	83920403	83920431	GTGAGCCACTGTGCCTGGCCNNNNNNNN
chr9	chr9	20	ATGAGCCACTGTGCCTGGCCTGGAGGCA	1	32638809	32638837	GTGAGCCACTGTGCCTGGCCNNNNNNNN
chr9	chr9	20	GTGAGCCACTGCGCCTGGCCCTGAATGT	1	140429916	140429944	GTGAGCCACTGTGCCTGGCCNNNNNNNN
chr9	chr9	20	ATGAGCCACTGTGCCCAGCCAAGAGTGT	3	135558270	135558298	GTGAGCCACTGTGCCTGGCCNNNNNNNN
chr8	chr8	20	ATGAGCCACTGTGCCTGGCCAGGGGACA	1	98914370	98914398	GTGAGCCACTGTGCCTGGCCNNNNNNNN
chr8	chr8	20	GTGAGCCACTGCGCCCAGCCAGGAGTAC	3	59368083	59368111	GTGAGCCACTGTGCCTGGCCNNNNNNNN
chr8	chr8	20	GTGAGCCACTGTGCCTGGCCATGAGCCA	0	101226920	101226948	GTGAGCCACTGTGCCTGGCCNNNNNNNN
chr7	chr7	20	ATGAGCCACTGTGCCCAGCCAAGAGTTA	3	128855259	128855287	GTGAGCCACTGTGCCTGGCCNNNNNNNN
chr6	chr6	20	GTGAGCCACTGTGCCTGGCCTTGAGCAT	0	86247376	86247404	GTGAGCCACTGTGCCTGGCCNNNNNNNN
chr6	chr6	20	GTGAGCCACTGTGCCCAGCCAGGAATCT	2	8040802	8040830	GTGAGCCACTGTGCCTGGCCNNNNNNNN
chr6	chr6	20	GTGAGCCACTGTGCCTGGCCCTGGATGA	0	30931383	30931411	GTGAGCCACTGTGCCTGGCCNNNNNNNN
chr6	chr6	20	GTGAGCCACCGTGCCTGGCCAAGAGTGA	1	24798624	24798652	GTGAGCCACTGTGCCTGGCCNNNNNNNN
chr6	chr6	20	GTGAGCCACAGTGCCTGGCCTGGAGTGT	1	137081817	137081845	GTGAGCCACTGTGCCTGGCCNNNNNNNN
chr6	chr6	20	ATGAGCCACTGTGCCTGGCCCAGGGTAT	1	107578452	107578480	GTGAGCCACTGTGCCTGGCCNNNNNNNN
chr5	chr5	20	ATGAGCCACTGTGCCTGGCCCAGAGTTT	1	74626760	74626788	GTGAGCCACTGTGCCTGGCCNNNNNNNN
chr4	chr4	20	GTGAGCCACTGTGCCCAGCCCGGGGTCT	2	54950327	54950355	GTGAGCCACTGTGCCTGGCCNNNNNNNN
chr4	chr4	20	GTGAGCCACTGTGCCTGGCCGAGAGCAC	0	166962730	166962758	GTGAGCCACTGTGCCTGGCCNNNNNNNN
chr4	chr4	20	ATGAGCCACTGTGCCTGGCCTTGAGTCA	1	149189370	149189398	GTGAGCCACTGTGCCTGGCCNNNNNNNN
chr4	chr4	20	GTGAGCCACCGTGCCTGGCCAAGGGTAT	1	140273542	140273570	GTGAGCCACTGTGCCTGGCCNNNNNNNN
chr3	chr3	20	GTGAGCCACTGTGCCTGGCCCAGAATTT	0	18690413	18690441	GTGAGCCACTGTGCCTGGCCNNNNNNNN
chr3	chr3	20	GTGAGCCACTGTGCCTGGCCTGGAAATT	0	182685976	182686004	GTGAGCCACTGTGCCTGGCCNNNNNNNN
chr2	chr2	20	ATGAGCCACTGTGCCTGGCCCAGAGTTC	1	82794906	82794934	GTGAGCCACTGTGCCTGGCCNNNNNNNN
chr2	chr2	20	GTGAGCCACTGTGCCTGGCCTTGAGCTG	0	47463127	47463155	GTGAGCCACTGTGCCTGGCCNNNNNNNN
chr2	chr2	20	GTGAGCCACTGTGCCTGGCCTAGAATTT	0	43945388	43945416	GTGAGCCACTGTGCCTGGCCNNNNNNNN
chr2	chr2	20	GTGAGCCACCGTGCCTGGCCAAGAATTT	1	42385396	42385424	GTGAGCCACTGTGCCTGGCCNNNNNNNN
chr22	chr22	20	GTGAGCCACCGTGCCCAGCCAAGAGTGA	3	33308410	33308438	GTGAGCCACTGTGCCTGGCCNNNNNNNN
chr2	chr2	20	ATGAGCCACTGTGCCTGGCCTAGGAATC	1	177048474	177048502	GTGAGCCACTGTGCCTGGCCNNNNNNNN
chr21	chr21	20	GTGAGCCACTGTGCCCGGCCAAGGGTAA	1	35247230	35247258	GTGAGCCACTGTGCCTGGCCNNNNNNNN
chr21	chr21	20	GTGAGCCACTGTGCCCAGCCCAGAATGC	2	18881989	18882017	GTGAGCCACTGTGCCTGGCCNNNNNNNN
chr20	chr20	20	GTGAGCCACCGTGCCTGGCCAGGAATGG	1	58483011	58483039	GTGAGCCACTGTGCCTGGCCNNNNNNNN
chr20	chr20	20	ATGAGCCACTGTGCCTGGCCTAGGATGG	1	46073680	46073708	GTGAGCCACTGTGCCTGGCCNNNNNNNN
chr20	chr20	20	GTGAGCCACTGTGCCTGGCCAGGAATAT	0	22369838	22369866	GTGAGCCACTGTGCCTGGCCNNNNNNNN
chr20	chr20	20	GTGAGCCACTGTGCCTGGCCATGAATGG	0	17090985	17091013	GTGAGCCACTGTGCCTGGCCNNNNNNNN
chr19	chr19	20	GTGAGCCACTGTGCCTGGCCAGGAAGTA	0	41706558	41706586	GTGAGCCACTGTGCCTGGCCNNNNNNNN
chr19	chr19	20	GTGAGCCACTGTGCCCAGCCTGGGATGT	2	13720484	13720512	GTGAGCCACTGTGCCTGGCCNNNNNNNN
chr17	chr17	20	GTGAGCCACTGCGCCCGGCCAAGGATGA	2	19429509	19429537	GTGAGCCACTGTGCCTGGCCNNNNNNNN
chr16	chr16	20	GTGAGCCACTGCGCCTGGCCTGGAAATG	1	66724719	66724747	GTGAGCCACTGTGCCTGGCCNNNNNNNN
chr16	chr16	20	GTGAGCCACTGCGCCTGGCCGAGGGTCT	1	58089208	58089236	GTGAGCCACTGTGCCTGGCCNNNNNNNN
chr16	chr16	20	ATGAGCCACTGTGCCTGGCCTGGAGTGA	1	21156148	21156176	GTGAGCCACTGTGCCTGGCCNNNNNNNN
chr15	chr15	20	GTGAGCCACCGTGCCTGGCCAGGAAATG	1	99107987	99108015	GTGAGCCACTGTGCCTGGCCNNNNNNNN
chr15	chr15	20	GTGAGCCACTGTGCCCGGCCAAGAGTAG	1	70990099	70990127	GTGAGCCACTGTGCCTGGCCNNNNNNNN
chr15	chr15	20	ATGAGCCACTGTGCCTGGCCGTGGATTT	1	33293193	33293221	GTGAGCCACTGTGCCTGGCCNNNNNNNN
chr14	chr14	20	GTGAGCCACTGTGCCTGGCCTTGGGTAT	0	70686677	70686705	GTGAGCCACTGTGCCTGGCCNNNNNNNN
chr14	chr14	20	GTGGGCCACTGTGCCTGGCCATGAGTCA	1	40656234	40656262	GTGAGCCACTGTGCCTGGCCNNNNNNNN
chr14	chr14	20	GTGAGCCACTGTGCCTAGCCAGGGGTAG	1	34760430	34760458	GTGAGCCACTGTGCCTGGCCNNNNNNNN
chr14	chr14	20	GTGAGCCACTGCGCCTGGCCCAGAGTCA	1	21762666	21762694	GTGAGCCACTGTGCCTGGCCNNNNNNNN
chr1	chr1	20	ATGAGCCACTGTGCCTGGCCTAGAATCT	1	33452421	33452449	GTGAGCCACTGTGCCTGGCCNNNNNNNN
chr12	chr12	20	GTGAGCCACTGCGCCTGGCCGAGAGTAT	1	92678228	92678256	GTGAGCCACTGTGCCTGGCCNNNNNNNN
chr1	chr1	20	ATGAGCCACTGTGCCTGGCCGAGGGTAC	1	26340402	26340430	GTGAGCCACTGTGCCTGGCCNNNNNNNN
chr12	chr12	20	GTGAGCCACTGTGCCTGGCCAAGAAGGA	0	112139169	112139197	GTGAGCCACTGTGCCTGGCCNNNNNNNN
chr11	chr11	20	GTGAGCCACTGTGCCTGGCCAGGAAACT	0	14395028	14395056	GTGAGCCACTGTGCCTGGCCNNNNNNNN
chr11	chr11	20	GTGAGCCACCGTGCCTGGCCAAGAGTAG	1	120507260	120507288	GTGAGCCACTGTGCCTGGCCNNNNNNNN
chr10	chr10	20	GTGAGCCACTGTGCCTGGCCTTGAAGTT	0	5718348	5718376	GTGAGCCACTGTGCCTGGCCNNNNNNNN
chr10	chr10	20	GTGAGCCACTGTGCCTGGCCAAGAATGT	0	133818173	133818201	GTGAGCCACTGTGCCTGGCCNNNNNNNN
chr10	chr10	20	GTGAGCCACTGTGCCCAGCCAGGAATCT	2	116023053	116023081	GTGAGCCACTGTGCCTGGCCNNNNNNNN
chr10	chr10	20	GTGAGCCACTGTGCCTGGCCGGGAAGTT	0	103123417	103123445	GTGAGCCACTGTGCCTGGCCNNNNNNNN
chrX	chrX	19	GTGAGCCACCGTGCCCGGCCAAGAGTGT	2	110944098	110944126	GTGAGCCACTGTGCCTGGCCNNNNNNNN
chr9	chr9	19	GTGAGCCACTGTGCCTGGCCAGGAAACA	0	97536315	97536343	GTGAGCCACTGTGCCTGGCCNNNNNNNN
chr9	chr9	19	GTGAGCCACTGTGCCTGGCCAAGAAATA	0	87123713	87123741	GTGAGCCACTGTGCCTGGCCNNNNNNNN
chr9	chr9	19	GTGAGCCACCGTGCCTGGCCAAGATATA	1	82434298	82434326	GTGAGCCACTGTGCCTGGCCNNNNNNNN
chr9	chr9	19	GTGAGCCACCGTGCCTGGCCAGGGATTA	1	132336975	132337003	GTGAGCCACTGTGCCTGGCCNNNNNNNN
chr8	chr8	19	GTGAACCACTGTGCCTGGCCTAGAGTAG	1	95708000	95708028	GTGAGCCACTGTGCCTGGCCNNNNNNNN
chr7	chr7	19	GTGAGCCACTGCGCCTGGCCGAGAATGT	1	75951037	75951065	GTGAGCCACTGTGCCTGGCCNNNNNNNN
chr7	chr7	19	ATGAGCCACTGTGCCTGGCTAGGGGTCA	2	68646373	68646401	GTGAGCCACTGTGCCTGGCCNNNNNNNN
chr7	chr7	19	GTGAGCCACTGTGCCTGGCCTAGAAACA	0	149592996	149593024	GTGAGCCACTGTGCCTGGCCNNNNNNNN
chr6	chr6	19	ATGAGCCACTGTGCCTGGCCTGGAATAT	1	31672772	31672800	GTGAGCCACTGTGCCTGGCCNNNNNNNN
chr6	chr6	19	GTGAACCACTGTGCCCAGCCCAGAATCA	3	17678296	17678324	GTGAGCCACTGTGCCTGGCCNNNNNNNN
chr6	chr6	19	GTGAGCCACTGCGCCCAGCCTCGAGTTC	3	155399459	155399487	GTGAGCCACTGTGCCTGGCCNNNNNNNN
chr6	chr6	19	ATGAGCCACTGTGCCCAGCCTGGAATGC	3	151180280	151180308	GTGAGCCACTGTGCCTGGCCNNNNNNNN
chr6	chr6	19	ATGAGCCACCGTGCCTGGCCTAGAATTT	2	149971185	149971213	GTGAGCCACTGTGCCTGGCCNNNNNNNN
chr6	chr6	19	GTGAGCCACCGTGCCTGGCCAGGAGTCT	1	14591693	14591721	GTGAGCCACTGTGCCTGGCCNNNNNNNN
chr6	chr6	19	ATGAGCCACTGTGCCTGGCCAGGAACTG	1	116642661	116642689	GTGAGCCACTGTGCCTGGCCNNNNNNNN
chr6	chr6	19	GTGAGCCACTGTGCCTGACCAAGAGTTT	1	109251020	109251048	GTGAGCCACTGTGCCTGGCCNNNNNNNN
chr5	chr5	19	GTGAGCCACTGTGCCTGGCCTTGGATTA	0	79714412	79714440	GTGAGCCACTGTGCCTGGCCNNNNNNNN
chr5	chr5	19	ATGAGCCACTGTGCCTGGCCTGGAATTC	1	54870114	54870142	GTGAGCCACTGTGCCTGGCCNNNNNNNN
chr5	chr5	19	GTGAGCCACTGTGCCCAGCCAAGGGTCT	2	32340459	32340487	GTGAGCCACTGTGCCTGGCCNNNNNNNN
chr5	chr5	19	GTGAGCCACTGTGCCTGGCCAAGAAAGT	0	179123556	179123584	GTGAGCCACTGTGCCTGGCCNNNNNNNN
chr5	chr5	19	GTGAGCCACTGCGCCTGGCCAGGAATGG	1	158265163	158265191	GTGAGCCACTGTGCCTGGCCNNNNNNNN
chr5	chr5	19	GTGAGCCACCGTGCCTGGCCAGGAGTGA	1	148816714	148816742	GTGAGCCACTGTGCCTGGCCNNNNNNNN
chr5	chr5	19	ATGAGCCACTGTGTCTGGCCATGAGTTT	2	139627233	139627261	GTGAGCCACTGTGCCTGGCCNNNNNNNN
chr5	chr5	19	ATGAGCCACTGTGCCCGGCCTAGAGTCA	2	130205666	130205694	GTGAGCCACTGTGCCTGGCCNNNNNNNN
chr4	chr4	19	GTGAGCCACTGTGCCCAGCCGAGAATAC	2	5770293	5770321	GTGAGCCACTGTGCCTGGCCNNNNNNNN
chr4	chr4	19	ATGAGCCACTGTGCCCGGCCAGGAGTCT	2	186895719	186895747	GTGAGCCACTGTGCCTGGCCNNNNNNNN
chr4	chr4	19	GTGAGCCACTGTGCCTGGCCTGGGGTGA	0	160840268	160840296	GTGAGCCACTGTGCCTGGCCNNNNNNNN
chr2	chr2	19	GTGAGCCACTGTGCCCGGCCAAGAATCA	1	80406778	80406806	GTGAGCCACTGTGCCTGGCCNNNNNNNN
chr22	chr22	19	ATGAGCCACTGTGCCCAGCCAAGAATCA	3	40664369	40664397	GTGAGCCACTGTGCCTGGCCNNNNNNNN
chr2	chr2	19	GTGAGCCACTGTGCCTGGCCTGGGGGCA	0	236240209	236240237	GTGAGCCACTGTGCCTGGCCNNNNNNNN
chr2	chr2	19	ATGAGCCACTGTGCCCAGCCTAGAGTAA	3	231214433	231214461	GTGAGCCACTGTGCCTGGCCNNNNNNNN
chr22	chr22	19	ATGAGCCACCGTGCCTGGCCAGGAGTTT	2	26962092	26962120	GTGAGCCACTGTGCCTGGCCNNNNNNNN
chr2	chr2	19	GTGAGCCACTGCGCCTGGCCTTGAGTGT	1	218865584	218865612	GTGAGCCACTGTGCCTGGCCNNNNNNNN
chr2	chr2	19	GTGAGCCACTATGCCTGGCCAAGAATTT	1	170489359	170489387	GTGAGCCACTGTGCCTGGCCNNNNNNNN
chr2	chr2	19	GTGAGCCACTGCGCCTGGCCGAGAATTC	1	149620434	149620462	GTGAGCCACTGTGCCTGGCCNNNNNNNN
chr19	chr19	19	GTGAGCCACTGTGCCTGGCCATGAATGG	0	33822852	33822880	GTGAGCCACTGTGCCTGGCCNNNNNNNN
chr19	chr19	19	GTGAGCCACTGTGCCCGGCCAAGAATTT	1	2071888	2071916	GTGAGCCACTGTGCCTGGCCNNNNNNNN
chr19	chr19	19	GTGAGCCACCATGCCTGGCCTGGAATTT	2	12439010	12439038	GTGAGCCACTGTGCCTGGCCNNNNNNNN
chr1	chr1	19	ATGAGCCACTGTGCCTGGCCAAGAATAT	1	8216475	8216503	GTGAGCCACTGTGCCTGGCCNNNNNNNN
chr18	chr18	19	GTGAGCCACTGCGCCCGGCCAGGAGTCA	2	20944578	20944606	GTGAGCCACTGTGCCTGGCCNNNNNNNN
chr1	chr1	19	GTAAGCCACTGTGCCTGGCCAAGAACAC	1	78018432	78018460	GTGAGCCACTGTGCCTGGCCNNNNNNNN
chr17	chr17	19	GTGAGCCACTGTGCCCGGCCAGGAATTC	1	71813493	71813521	GTGAGCCACTGTGCCTGGCCNNNNNNNN
chr17	chr17	19	ATGAGCCACTGTGCCTGGCCTGGGGTTT	1	61887730	61887758	GTGAGCCACTGTGCCTGGCCNNNNNNNN
chr17	chr17	19	GTGAGCCACCGTGCCTGGCCTGGAATTT	1	43395369	43395397	GTGAGCCACTGTGCCTGGCCNNNNNNNN
chr17	chr17	19	GTGAGCCATCGTGCCTGGCCAGGAATAC	2	20975059	20975087	GTGAGCCACTGTGCCTGGCCNNNNNNNN
chr16	chr16	19	GTGAGCCACTGTGCCTGGCCTGGAAGAC	0	30508290	30508318	GTGAGCCACTGTGCCTGGCCNNNNNNNN
chr16	chr16	19	GTGAGCCACTGCGCCTGGCCTGGAATAC	1	30156935	30156963	GTGAGCCACTGTGCCTGGCCNNNNNNNN
chr16	chr16	19	GTGAGCCATTGTGCCTGGCCCAGAGACA	1	11843107	11843135	GTGAGCCACTGTGCCTGGCCNNNNNNNN
chr15	chr15	19	GTGAGCCACTGTGCCTGGCCCAGAAAGA	0	94321143	94321171	GTGAGCCACTGTGCCTGGCCNNNNNNNN
chr1	chr1	19	GTGAGCCACTGTGCCTGGCCTGGAACTG	0	54430638	54430666	GTGAGCCACTGTGCCTGGCCNNNNNNNN
chr15	chr15	19	ATGAGCCACTGTGCCCGGCCATGGGTCT	2	26174141	26174169	GTGAGCCACTGTGCCTGGCCNNNNNNNN
chr1	chr1	19	GTGAGCCACCGTGCCCGGCCGGGAGTCT	2	52604239	52604267	GTGAGCCACTGTGCCTGGCCNNNNNNNN
chr14	chr14	19	GTGAGCCACCGTGCCTGGCCGGGAAGCT	1	58631927	58631955	GTGAGCCACTGTGCCTGGCCNNNNNNNN
chr14	chr14	19	GTGAGCCACTGTGCCCAGCCAGGAATAT	2	53112432	53112460	GTGAGCCACTGTGCCTGGCCNNNNNNNN
chr14	chr14	19	GTGAGCCACTGTGCCTGGCCTGGAATTC	0	39625398	39625426	GTGAGCCACTGTGCCTGGCCNNNNNNNN
chr1	chr1	19	GTGAGCCACTGTGCCTGGCCAAGAGTTC	0	40334024	40334052	GTGAGCCACTGTGCCTGGCCNNNNNNNN
chr13	chr13	19	GTGAGCCACTGCGCCTGGCCAAGAAGCC	1	92790483	92790511	GTGAGCCACTGTGCCTGGCCNNNNNNNN
chr1	chr1	19	GTGAGCCACTGTGCCTGGCCAAGAATGT	0	37849772	37849800	GTGAGCCACTGTGCCTGGCCNNNNNNNN
chr12	chr12	19	GTGAGCCACTGCGCCTGGCCTGGAATAA	1	73194556	73194584	GTGAGCCACTGTGCCTGGCCNNNNNNNN
chr1	chr1	19	GTGAGCCACTGGGCCTGGCCTAGAGTTC	1	238300844	238300872	GTGAGCCACTGTGCCTGGCCNNNNNNNN
chr11	chr11	19	GTGAGCCACTGTGCCTGGCCTAGAATAC	0	82777873	82777901	GTGAGCCACTGTGCCTGGCCNNNNNNNN
chr1	chr1	19	GTGAGCCACTGCGCCTGGCCTGGAATGT	1	179239973	179240001	GTGAGCCACTGTGCCTGGCCNNNNNNNN
chr1	chr1	19	GTGAGCCACTGTGCCTGGCCAGGAAGAA	0	153454467	153454495	GTGAGCCACTGTGCCTGGCCNNNNNNNN
chr1	chr1	19	GTGAGCCACTGTGCCCAGCCGTGGGTGT	2	116513457	116513485	GTGAGCCACTGTGCCTGGCCNNNNNNNN
chr10	chr10	19	GTGAGCCACTGTGCCCAGCCTGGAATTC	2	62625869	62625897	GTGAGCCACTGTGCCTGGCCNNNNNNNN
chr10	chr10	19	GTGAACCACTGTGCCTGGCCAAGAAAGA	1	51550552	51550580	GTGAGCCACTGTGCCTGGCCNNNNNNNN
chr10	chr10	19	GTAAGCCACTGTGCCTGGCCCAGAATTT	1	21312332	21312360	GTGAGCCACTGTGCCTGGCCNNNNNNNN
chr10	chr10	19	GTGAGCCACTGTGCCCAGCCAAGAGTAT	2	119641127	119641155	GTGAGCCACTGTGCCTGGCCNNNNNNNN
chr10	chr10	19	GTGAGCCACTGTGCCTGGCCTAGAAAAT	0	111600840	111600868	GTGAGCCACTGTGCCTGGCCNNNNNNNN
chr10	chr10	19	GTGAGCCACTGTGCCTGGCCCAGAATTC	0	105867279	105867307	GTGAGCCACTGTGCCTGGCCNNNNNNNN
chrX	chrX	18	ATGAGCCACTGTGCCCGGCCAAGAGTCT	2	95977064	95977092	GTGAGCCACTGTGCCTGGCCNNNNNNNN
chrX	chrX	18	ATGAGCCACTGTGCCTGGTCTAGAATTG	2	9477805	9477833	GTGAGCCACTGTGCCTGGCCNNNNNNNN
chrX	chrX	18	GTGAGCCACTGTGCCTGGCCAAGAGTGC	0	563335	563363	GTGAGCCACTGTGCCTGGCCNNNNNNNN
chrX	chrX	18	GTGAGCCACCGTGCCTGGCCTCGGGTAT	1	18920905	18920933	GTGAGCCACTGTGCCTGGCCNNNNNNNN
chrX	chrX	18	GTGAGCCACTGCGCCTGGCCTTGAGTGC	1	144922336	144922364	GTGAGCCACTGTGCCTGGCCNNNNNNNN
chr9	chr9	18	GTGAGCCACCATGCCTGGCCTGGAGTCA	2	97068191	97068219	GTGAGCCACTGTGCCTGGCCNNNNNNNN
chr8	chr8	18	GTGAGCCACCGTGCCCAGCCTTGAGTTG	3	91791813	91791841	GTGAGCCACTGTGCCTGGCCNNNNNNNN
chr8	chr8	18	ATGAGCCACTGTGCCCAGCCAGGAATGG	3	69987248	69987276	GTGAGCCACTGTGCCTGGCCNNNNNNNN
chr8	chr8	18	GTGAGCCACTGTGCCTGGCCAGGAATTT	0	55341617	55341645	GTGAGCCACTGTGCCTGGCCNNNNNNNN
chr8	chr8	18	GTGAGCCACTGTGCCCAGCCAAGAATTG	2	37740967	37740995	GTGAGCCACTGTGCCTGGCCNNNNNNNN
chr8	chr8	18	GTGAGCCACTGTGCCTAGCCCAGAGTTG	1	28526133	28526161	GTGAGCCACTGTGCCTGGCCNNNNNNNN
chr7	chr7	18	GTGAGCCACTGTGCCCAGCCTGGAGTGA	2	87846233	87846261	GTGAGCCACTGTGCCTGGCCNNNNNNNN
chr7	chr7	18	ATGAGCCACTGTGCCTGGCCCAGAATGT	1	71700938	71700966	GTGAGCCACTGTGCCTGGCCNNNNNNNN
chr7	chr7	18	GTAAGCCACTGTGCCTGGCCATGAATCT	1	71276471	71276499	GTGAGCCACTGTGCCTGGCCNNNNNNNN
chr7	chr7	18	GTGAGCCACTGTGCCTGGCCTAGGAGAC	0	147749849	147749877	GTGAGCCACTGTGCCTGGCCNNNNNNNN
chr7	chr7	18	GTGAGCCACTGCGCCTGGCCTGGAGTCT	1	106487029	106487057	GTGAGCCACTGTGCCTGGCCNNNNNNNN
chr5	chr5	18	GTGAGCCACTGCGCCTGGCCAGGAGTTG	1	74009939	74009967	GTGAGCCACTGTGCCTGGCCNNNNNNNN
chr5	chr5	18	GTGAGCCACTGTGCCTGGCCAGGAACAC	0	54619527	54619555	GTGAGCCACTGTGCCTGGCCNNNNNNNN
chr5	chr5	18	GTGAGCCACTGTGCCCGGCCAAGAGTAT	1	26851356	26851384	GTGAGCCACTGTGCCTGGCCNNNNNNNN
chr5	chr5	18	GTGAGCCACCGTGCCTGGCCAAGAGCTA	1	173456819	173456847	GTGAGCCACTGTGCCTGGCCNNNNNNNN
chr5	chr5	18	GTGAGCCACTGTGCCCAGCCAGGAATTT	2	132034709	132034737	GTGAGCCACTGTGCCTGGCCNNNNNNNN
chr5	chr5	18	GTGAGCCACTGTGCCCGGCCCTGGGTCA	1	112127652	112127680	GTGAGCCACTGTGCCTGGCCNNNNNNNN
chr4	chr4	18	ATGAGCCACTGTGCCTGGCCTTGAGTTG	1	91205923	91205951	GTGAGCCACTGTGCCTGGCCNNNNNNNN
chr4	chr4	18	GTGAGCCACCGTGCCCAGCCTAGAGTTG	3	83369784	83369812	GTGAGCCACTGTGCCTGGCCNNNNNNNN
chr4	chr4	18	GTGAGCCACCGTGCCCGGCCAAGAGTTT	2	56581231	56581259	GTGAGCCACTGTGCCTGGCCNNNNNNNN
chr4	chr4	18	GTGAGCCACTGCGCCTGGACAGGAGTTT	2	44460	44488	GTGAGCCACTGTGCCTGGCCNNNNNNNN
chr4	chr4	18	GTGAGCCACTGCGCCTGGCCTGGAGTTG	1	4057423	4057451	GTGAGCCACTGTGCCTGGCCNNNNNNNN
chr4	chr4	18	GTGAGCCACTGCGCCTGGCCTAGAGTCT	1	176159513	176159541	GTGAGCCACTGTGCCTGGCCNNNNNNNN
chr4	chr4	18	GTGAGCCACTGTGCCTGGCCCAGGATGT	0	15930387	15930415	GTGAGCCACTGTGCCTGGCCNNNNNNNN
chr4	chr4	18	ATGAGCCACTGTGCCTGGCCAGGAATTC	1	158046795	158046823	GTGAGCCACTGTGCCTGGCCNNNNNNNN
chr3	chr3	18	ATGAGCCACTGTGCCTGGCCAGGAATGG	1	56427135	56427163	GTGAGCCACTGTGCCTGGCCNNNNNNNN
chr3	chr3	18	GTGAGCCACTGTGCCTGGCCTTGAACAA	0	40543300	40543328	GTGAGCCACTGTGCCTGGCCNNNNNNNN
chr3	chr3	18	GTGAGCCACTGCGCCCAGCCCAGAGTGT	3	18656605	18656633	GTGAGCCACTGTGCCTGGCCNNNNNNNN
chr3	chr3	18	GTGAGCCACCGTGCCTGGCCTGGAGTTT	1	180670025	180670053	GTGAGCCACTGTGCCTGGCCNNNNNNNN
chr3	chr3	18	GTGAGCCACTGTGCCTAGCCAAGAGTAT	1	164091199	164091227	GTGAGCCACTGTGCCTGGCCNNNNNNNN
chr3	chr3	18	GTGAGCCACTGTGCCTGGCCTGAAGTTT	0	133377017	133377045	GTGAGCCACTGTGCCTGGCCNNNNNNNN
chr2	chr2	18	GTGAGCCACTGTGCCTGGCCTAGAATAC	0	68369670	68369698	GTGAGCCACTGTGCCTGGCCNNNNNNNN
chr2	chr2	18	ATGAGCCACTGTGCCTGGCCTAGAATAG	1	42709970	42709998	GTGAGCCACTGTGCCTGGCCNNNNNNNN
chr2	chr2	18	GTGAGCCACTGTGCCCGGCCGAGAATTG	1	23480711	23480739	GTGAGCCACTGTGCCTGGCCNNNNNNNN
chr2	chr2	18	GTAAGCCACTGTGCCCGGCCAAGAGTAG	2	229369104	229369132	GTGAGCCACTGTGCCTGGCCNNNNNNNN
chr22	chr22	18	GTGAGCCACTGTGCCCAGCCTGGGATGG	2	21005785	21005813	GTGAGCCACTGTGCCTGGCCNNNNNNNN
chr22	chr22	18	GTGAGCCACTGTGCCTGGCCCTGAGACA	0	20873419	20873447	GTGAGCCACTGTGCCTGGCCNNNNNNNN
chr22	chr22	18	ATGAGCCACTGTGCCCGGCCAAGAGTTC	2	17742599	17742627	GTGAGCCACTGTGCCTGGCCNNNNNNNN
chr2	chr2	18	GTGAGCCACTGTGCCTGGCCTAGAAGCC	0	182640087	182640115	GTGAGCCACTGTGCCTGGCCNNNNNNNN
chr19	chr19	18	ATGAGCCACTGTGCCTGGCCCAGAATTC	1	9756000	9756028	GTGAGCCACTGTGCCTGGCCNNNNNNNN
chr19	chr19	18	GTGAGCCACTGTGCCTGGCCAAGGGGTA	0	55074251	55074279	GTGAGCCACTGTGCCTGGCCNNNNNNNN
chr19	chr19	18	GTGAGCCACTGCGCCTGGCCAAGAATCC	1	37252051	37252079	GTGAGCCACTGTGCCTGGCCNNNNNNNN
chr19	chr19	18	GTGAACCACTGTGCCCAGCCAAGGGTTT	3	23551823	23551851	GTGAGCCACTGTGCCTGGCCNNNNNNNN
chr19	chr19	18	GTGAGCCACTGTGCCTGGCCATGAGGGA	0	11328142	11328170	GTGAGCCACTGTGCCTGGCCNNNNNNNN
chr1	chr1	18	GTGAGCCACTGTGCCTGGCCAAGAAGCA	0	89010738	89010766	GTGAGCCACTGTGCCTGGCCNNNNNNNN
chr18	chr18	18	GTGAGCCACTGTGCCTGGCCTGGACATT	0	24323349	24323377	GTGAGCCACTGTGCCTGGCCNNNNNNNN
chr17	chr17	18	GTGAGCCACTGTGCCCAGCCATGAGATG	2	49834115	49834143	GTGAGCCACTGTGCCTGGCCNNNNNNNN
chr17	chr17	18	ATGAGCCACTGTGCCCGGCCTTGAGTTT	2	47743899	47743927	GTGAGCCACTGTGCCTGGCCNNNNNNNN
chr17	chr17	18	ATGAGCCACTATGCCTGGCCTAGAGTAT	2	10853066	10853094	GTGAGCCACTGTGCCTGGCCNNNNNNNN
chr16	chr16	18	GTGAGCCACCGTGCCTGGCCAAGAAACT	1	87726989	87727017	GTGAGCCACTGTGCCTGGCCNNNNNNNN
chr16	chr16	18	ATGAGCCACTGTGCCCAGCCAGGGGTCT	3	71561895	71561923	GTGAGCCACTGTGCCTGGCCNNNNNNNN
chr16	chr16	18	GTGAGCCACTACGCCTGGCCAAGAATTG	2	58730952	58730980	GTGAGCCACTGTGCCTGGCCNNNNNNNN
chr16	chr16	18	GTGAGCCACTGTGCCCGGCCAAGAATAG	1	29174436	29174464	GTGAGCCACTGTGCCTGGCCNNNNNNNN
chr16	chr16	18	GTGAGCCACCATGCCTGGCCCAGAGTGT	2	26946202	26946230	GTGAGCCACTGTGCCTGGCCNNNNNNNN
chr1	chr1	18	GTGAGCCACCGTGCCTGGCCAGGAATGG	1	5985954	5985982	GTGAGCCACTGTGCCTGGCCNNNNNNNN
chr1	chr1	18	GTGAGCCACTGTGCCCGGCCAAGGAACA	1	59018047	59018075	GTGAGCCACTGTGCCTGGCCNNNNNNNN
chr15	chr15	18	GTGAGCCACTGTGCCCAGCCTAGGGTTT	2	89508094	89508122	GTGAGCCACTGTGCCTGGCCNNNNNNNN
chr15	chr15	18	GTGAGCCACTGTACCTGGCCTTGAATCT	1	76065257	76065285	GTGAGCCACTGTGCCTGGCCNNNNNNNN
chr1	chr1	18	ATGAGCCACTATGCCCAGCCTAGAGTTC	4	41814628	41814656	GTGAGCCACTGTGCCTGGCCNNNNNNNN
chr13	chr13	18	GTGAGCCACCGTGCCCAGCCTCGAATAC	3	50620578	50620606	GTGAGCCACTGTGCCTGGCCNNNNNNNN
chr12	chr12	18	ATGAGCCACTGTGCCCAGCCCAGAGTTT	3	70547857	70547885	GTGAGCCACTGTGCCTGGCCNNNNNNNN
chr1	chr1	18	ATGAGCCACCGTGCCTGGCCAAGAGTTC	2	25684717	25684745	GTGAGCCACTGTGCCTGGCCNNNNNNNN
chr12	chr12	18	GTGAGCCACTGTGCCTGGCCCTGAATTG	0	51528919	51528947	GTGAGCCACTGTGCCTGGCCNNNNNNNN
chr12	chr12	18	GTGAGCCACTGTGCCCAGCCCAGAATTC	2	46868535	46868563	GTGAGCCACTGTGCCTGGCCNNNNNNNN
chr1	chr1	18	ATGAGCCACTGTGCCTGGCCTAGAGATG	1	235538514	235538542	GTGAGCCACTGTGCCTGGCCNNNNNNNN
chr1	chr1	18	ATGAGCCACTGTGCCTGGCCAAGAACCT	1	233108452	233108480	GTGAGCCACTGTGCCTGGCCNNNNNNNN
chr12	chr12	18	GTGAGCCACCATGCCTGGCCTGGAGTCT	2	33073121	33073149	GTGAGCCACTGTGCCTGGCCNNNNNNNN
chr1	chr1	18	GTGAGCCACCGCGCCTGGCCGAGGGTTT	2	226376195	226376223	GTGAGCCACTGTGCCTGGCCNNNNNNNN
chr12	chr12	18	GTGAGCCACTGTGACTGGCCTGGAGTTT	1	129924276	129924304	GTGAGCCACTGTGCCTGGCCNNNNNNNN
chr12	chr12	18	GTGAGCCACTGCGCTTGGCCCAGAATTT	2	121558706	121558734	GTGAGCCACTGTGCCTGGCCNNNNNNNN
chr12	chr12	18	GTGAGCCACTGCGCCTGGCCTGGGGTTT	1	110703152	110703180	GTGAGCCACTGTGCCTGGCCNNNNNNNN
chr1	chr1	18	GTGAGCCACCGTGCCTGGCCTAGAATTT	1	174803274	174803302	GTGAGCCACTGTGCCTGGCCNNNNNNNN
chr11	chr11	18	GTGAGCCACCGTGCCTGGCCTGGGGTAT	1	68208825	68208853	GTGAGCCACTGTGCCTGGCCNNNNNNNN
chr1	chr1	18	GTGAGCCACCGTGCCTGGCCAGGAATGT	1	16411195	16411223	GTGAGCCACTGTGCCTGGCCNNNNNNNN
chr11	chr11	18	GTGAGCCACCGTGCCCGGCCTTGAGTTG	2	107721257	107721285	GTGAGCCACTGTGCCTGGCCNNNNNNNN
chr10	chr10	18	TTGAGCCACTGTGCCTGGCCAGGAATAA	1	30132355	30132383	GTGAGCCACTGTGCCTGGCCNNNNNNNN
chr10	chr10	18	ATGAGCCACTGTGCCTGGCCCAGAGATT	1	21681755	21681783	GTGAGCCACTGTGCCTGGCCNNNNNNNN
chr10	chr10	18	ATGAGCCACTGTGCCTGGCCTGGAAATT	1	121496620	121496648	GTGAGCCACTGTGCCTGGCCNNNNNNNN
chr10	chr10	18	GTGAGCCACTGCGCCTGGCCCCGAGTGC	1	103413589	103413617	GTGAGCCACTGTGCCTGGCCNNNNNNNN
chrX	chrX	17	GTGAGCCACTGCGCCCGGCCAGGAATCT	2	46241696	46241724	GTGAGCCACTGTGCCTGGCCNNNNNNNN
chrX	chrX	17	ATGAGCCACTGTGCCTGGCCCAGGATTT	1	14118544	14118572	GTGAGCCACTGTGCCTGGCCNNNNNNNN
chrX	chrX	17	GTGAGCCACTGTGCCCGGCCATGAGGCC	1	122794965	122794993	GTGAGCCACTGTGCCTGGCCNNNNNNNN
chrX	chrX	17	GTGAGCCACTGGGCCCAGCCATGAATGT	3	106445935	106445963	GTGAGCCACTGTGCCTGGCCNNNNNNNN
chr9	chr9	17	GTGAGCCACCATGCCTGGCCATGAATGA	2	19125260	19125288	GTGAGCCACTGTGCCTGGCCNNNNNNNN
chr8	chr8	17	GTGAGCCACCGTGCCCAGCCAGGAGTAT	3	30208457	30208485	GTGAGCCACTGTGCCTGGCCNNNNNNNN
chr8	chr8	17	GTGAGCCACTGTGCCTGGCCCAGAGAAA	0	102011891	102011919	GTGAGCCACTGTGCCTGGCCNNNNNNNN
chr7	chr7	17	GTGAGCCACTGTGCCTGGCCAAGAAGAT	0	72976572	72976600	GTGAGCCACTGTGCCTGGCCNNNNNNNN
chr7	chr7	17	GTGAGCCACTGCGCCTGGCCAAGAATAT	1	68164825	68164853	GTGAGCCACTGTGCCTGGCCNNNNNNNN
chr7	chr7	17	ATGAGCCACTGTGCCTGGCCAGGAGTTC	1	67015410	67015438	GTGAGCCACTGTGCCTGGCCNNNNNNNN
chr7	chr7	17	GTGAGCCACTGTGCCTGGCCAAGAAACA	0	6627360	6627388	GTGAGCCACTGTGCCTGGCCNNNNNNNN
chr7	chr7	17	GTGAGCCACTGTGCCCGGCCAAGAGTTC	1	30073904	30073932	GTGAGCCACTGTGCCTGGCCNNNNNNNN
chr7	chr7	17	GTGAGCCACCGTGCCTGGCCGGGAATAG	1	140547092	140547120	GTGAGCCACTGTGCCTGGCCNNNNNNNN
chr7	chr7	17	GTAAGCCACTGTGCCCAGCCAGGAGTTT	3	128966077	128966105	GTGAGCCACTGTGCCTGGCCNNNNNNNN
chr7	chr7	17	ATGAGCCACTATGCCTGGCCAAGAGTTA	2	107630764	107630792	GTGAGCCACTGTGCCTGGCCNNNNNNNN
chr6	chr6	17	GTGAGCCACTGCGCCTGGCCAGGAATTA	1	51739436	51739464	GTGAGCCACTGTGCCTGGCCNNNNNNNN
chr6	chr6	17	GTGAGCCACTGTGCCCAGCCAAGAGTTT	2	43561328	43561356	GTGAGCCACTGTGCCTGGCCNNNNNNNN
chr6	chr6	17	GTGAGCCACTGTGCCTGGCCAGGAAACA	0	36972665	36972693	GTGAGCCACTGTGCCTGGCCNNNNNNNN
chr6	chr6	17	GTGAGCCACTGTGCCTGGCCTAGAGTGA	0	30162342	30162370	GTGAGCCACTGTGCCTGGCCNNNNNNNN
chr6	chr6	17	GTGAGCTACTGTGCCTGGCCTAGAATAA	1	163860961	163860989	GTGAGCCACTGTGCCTGGCCNNNNNNNN
chr6	chr6	17	GTGAGCCACCGTGCCTGGCCGTGAATTG	1	151424288	151424316	GTGAGCCACTGTGCCTGGCCNNNNNNNN
chr6	chr6	17	GTGAGCCACTGTGCCTGGCCCAGGGCCC	0	13118987	13119015	GTGAGCCACTGTGCCTGGCCNNNNNNNN
chr5	chr5	17	GTGAGCCACTGTGCCTGGCCATGAAATG	0	80995944	80995972	GTGAGCCACTGTGCCTGGCCNNNNNNNN
chr5	chr5	17	GTGAGCCACTGTGCCTGGCCATGAGACT	0	76093430	76093458	GTGAGCCACTGTGCCTGGCCNNNNNNNN
chr5	chr5	17	GTGAGCCACTGCGCCTGGCCATGGGTGC	1	72378990	72379018	GTGAGCCACTGTGCCTGGCCNNNNNNNN
chr5	chr5	17	ATGAGCCACTGTGCCTGGCCTTGAATTC	1	138562120	138562148	GTGAGCCACTGTGCCTGGCCNNNNNNNN
chr5	chr5	17	GTGAGCCACCGTGCCCGGCCAGGAGTTA	2	137292940	137292968	GTGAGCCACTGTGCCTGGCCNNNNNNNN
chr4	chr4	17	GTGAGCCACTGTGCCTGGCCATGATTAT	0	84640531	84640559	GTGAGCCACTGTGCCTGGCCNNNNNNNN
chr4	chr4	17	GTGAGCCACAGCGCCTGGCCAAGAGTTT	2	25255661	25255689	GTGAGCCACTGTGCCTGGCCNNNNNNNN
chr4	chr4	17	GTGAGCCACCGTGCCCAGCCAGGAGTCA	3	17620442	17620470	GTGAGCCACTGTGCCTGGCCNNNNNNNN
chr4	chr4	17	GTGAGCCACTGTGCCTGGCCTGGGAGAT	0	17353134	17353162	GTGAGCCACTGTGCCTGGCCNNNNNNNN
chr4	chr4	17	GTGAGCCACCGTGCCCAGCCTGGAGTGG	3	152062557	152062585	GTGAGCCACTGTGCCTGGCCNNNNNNNN
chr4	chr4	17	GTGAGCCACCGTGCCCAGCCCAGAGTAC	3	108938984	108939012	GTGAGCCACTGTGCCTGGCCNNNNNNNN
chr3	chr3	17	GTGAGCCACTGTGCCTGGCCAAAAGTCA	0	69189689	69189717	GTGAGCCACTGTGCCTGGCCNNNNNNNN
chr3	chr3	17	GTGAGCCACCGTGCCTGGCCAAGGATTG	1	52453100	52453128	GTGAGCCACTGTGCCTGGCCNNNNNNNN
chr3	chr3	17	GTGAGCCACTGTGCCCGGCCAAGAATGG	1	49784134	49784162	GTGAGCCACTGTGCCTGGCCNNNNNNNN
chr3	chr3	17	GTGAGCCACTATGCCTGGCCAAGAGACC	1	149950331	149950359	GTGAGCCACTGTGCCTGGCCNNNNNNNN
chr3	chr3	17	GTGAGCCACTGTGCCCAGCCTAGAGTTA	2	128658260	128658288	GTGAGCCACTGTGCCTGGCCNNNNNNNN
chr2	chr2	17	ATGAGCCACTGTGCCCAGCCAGGAATCA	3	39255228	39255256	GTGAGCCACTGTGCCTGGCCNNNNNNNN
chr20	chr20	17	GTGAGCCACTGTGCCTGGCCAGGAAAAT	0	55444552	55444580	GTGAGCCACTGTGCCTGGCCNNNNNNNN
chr20	chr20	17	GTGAGCCACCGTGCCTGGCCGGGAGTTG	1	48326018	48326046	GTGAGCCACTGTGCCTGGCCNNNNNNNN
chr19	chr19	17	GTGAGCCACCATGCCTGGCCAGGAGTCA	2	55704306	55704334	GTGAGCCACTGTGCCTGGCCNNNNNNNN
chr19	chr19	17	GTGAGCCACTGTGCCTGGCCAAGGACAG	0	49603773	49603801	GTGAGCCACTGTGCCTGGCCNNNNNNNN
chr19	chr19	17	GTGAGCCACTGTGCCTGGCCAAGAAATT	0	45679424	45679452	GTGAGCCACTGTGCCTGGCCNNNNNNNN
chr19	chr19	17	GTGAGCCACTGTGCCTGGCCCTGAGTTG	0	33431946	33431974	GTGAGCCACTGTGCCTGGCCNNNNNNNN
chr19	chr19	17	ATGAGCCACTGTGCCTGGCCATGGGTCC	1	18490732	18490760	GTGAGCCACTGTGCCTGGCCNNNNNNNN
chr19	chr19	17	GTGAGCCACTGCGCCTGGCCAAGAATTC	1	15980964	15980992	GTGAGCCACTGTGCCTGGCCNNNNNNNN
chr17	chr17	17	GTGAGTCACTGTGCCCAGCCAGGAATAA	3	80610218	80610246	GTGAGCCACTGTGCCTGGCCNNNNNNNN
chr17	chr17	17	GTGAGCCACTGTGCCTGGCCTTGAAATC	0	66763945	66763973	GTGAGCCACTGTGCCTGGCCNNNNNNNN
chr17	chr17	17	GTGAGCCACTGTGCCTGGACAAGATACA	1	49472419	49472447	GTGAGCCACTGTGCCTGGCCNNNNNNNN
chr17	chr17	17	GTGAGCCACTGTGCCTGGCCCTGAGTTT	0	38686310	38686338	GTGAGCCACTGTGCCTGGCCNNNNNNNN
chr17	chr17	17	GTGAGCCACTGCGCCCGGCCTGGAGTAG	2	35034026	35034054	GTGAGCCACTGTGCCTGGCCNNNNNNNN
chr17	chr17	17	GTGAGCCACTGTGCCTGGCCATGAAATG	0	30926950	30926978	GTGAGCCACTGTGCCTGGCCNNNNNNNN
chr16	chr16	17	GTGAGCCACTGTGCCTGGCCCAGAATTC	0	2996603	2996631	GTGAGCCACTGTGCCTGGCCNNNNNNNN
chr1	chr1	17	GTGAGCCACCGTGCCTGACCATGAGTAC	2	52352688	52352716	GTGAGCCACTGTGCCTGGCCNNNNNNNN
chr15	chr15	17	GTGAGCCACTGTGCCTGGCCAAGGATTT	0	101801656	101801684	GTGAGCCACTGTGCCTGGCCNNNNNNNN
chr14	chr14	17	GTGAGCCACTGTGCCCGGCCCAGAAATT	1	73497273	73497301	GTGAGCCACTGTGCCTGGCCNNNNNNNN
chr14	chr14	17	ATGAGCCACTGTGCCTGGCCCAGAGTTA	1	64273751	64273779	GTGAGCCACTGTGCCTGGCCNNNNNNNN
chr1	chr1	17	GAGAGCCACTGTGCCTGGCCAAGAGACA	1	45827519	45827547	GTGAGCCACTGTGCCTGGCCNNNNNNNN
chr14	chr14	17	GTGAGCCACTGTGCCTGGCCCTGGACCC	0	31873822	31873850	GTGAGCCACTGTGCCTGGCCNNNNNNNN
chr1	chr1	17	GTGAGCCACTGCGCCTGGCCAAGAGAAC	1	36146163	36146191	GTGAGCCACTGTGCCTGGCCNNNNNNNN
chr12	chr12	17	GTGAGCCACTGTGCCTGGCCCTGAACAA	0	98805631	98805659	GTGAGCCACTGTGCCTGGCCNNNNNNNN
chr12	chr12	17	GTGAGCCACCGTGCCTGGCCTAGAGTGT	1	64677957	64677985	GTGAGCCACTGTGCCTGGCCNNNNNNNN
chr12	chr12	17	GTGAGCCACTGTGCCTGGCCCCGGCTCC	0	49703251	49703279	GTGAGCCACTGTGCCTGGCCNNNNNNNN
chr1	chr1	17	GTGAGCCACTGTGCCTGGCCATGAGCCA	0	236605705	236605733	GTGAGCCACTGTGCCTGGCCNNNNNNNN
chr1	chr1	17	GTGAGCCACTGTGCCCAGCCTGGAGTTT	2	23368213	23368241	GTGAGCCACTGTGCCTGGCCNNNNNNNN
chr12	chr12	17	GTGAGCCACTGTACCCAGCCTGGGGTGC	3	132206816	132206844	GTGAGCCACTGTGCCTGGCCNNNNNNNN
chr12	chr12	17	GTGAGCCACTGTGCCCGGCCAGGAATGT	1	12963006	12963034	GTGAGCCACTGTGCCTGGCCNNNNNNNN
chr12	chr12	17	GTGAGCCACTGTGCCCGGCCTTGGGTTT	1	112331799	112331827	GTGAGCCACTGTGCCTGGCCNNNNNNNN
chr1	chr1	17	GTGAGCCACTGTGCCCGGCCAAGGGTCC	1	1879589	1879617	GTGAGCCACTGTGCCTGGCCNNNNNNNN
chr1	chr1	17	ATGAGCCACCGTGCCTGGCCTGGAGTTT	2	173758719	173758747	GTGAGCCACTGTGCCTGGCCNNNNNNNN
chr1	chr1	17	GTAAGCCACTGTGTCTAGCCAGGAGTTT	3	161721167	161721195	GTGAGCCACTGTGCCTGGCCNNNNNNNN
chr1	chr1	17	GTGAGCCACCATGCCTGGCCATGAGTTA	2	160761039	160761067	GTGAGCCACTGTGCCTGGCCNNNNNNNN
chr11	chr11	17	GTGAGCCACTGTGCCCGGCCAAGAGTTT	1	15065513	15065541	GTGAGCCACTGTGCCTGGCCNNNNNNNN
chr10	chr10	17	ATGAGCCACTGTGCCTGGCCTGGAATTG	1	70728188	70728216	GTGAGCCACTGTGCCTGGCCNNNNNNNN
chr10	chr10	17	GTGAGCCACTGTGCCCAGCCAGGGATAA	2	50356045	50356073	GTGAGCCACTGTGCCTGGCCNNNNNNNN
chr10	chr10	17	GTGAGCCACTGTGCCCAGCCAAGAATAA	2	28863652	28863680	GTGAGCCACTGTGCCTGGCCNNNNNNNN
chr10	chr10	17	ATGAGCCACTGTGCCCAGCCCAGAGTCT	3	17440035	17440063	GTGAGCCACTGTGCCTGGCCNNNNNNNN
chr10	chr10	17	GTGAGCCACTGTGCCAGGCCTTGGGTTT	1	115638567	115638595	GTGAGCCACTGTGCCTGGCCNNNNNNNN
chrX	chrX	16	GTGAGCCACCGTGCCTGGCCGAGAGTGT	1	13430808	13430836	GTGAGCCACTGTGCCTGGCCNNNNNNNN
chrX	chrX	16	GTGAGCCACTGTGCCTGGCTAAGAATCA	1	119798891	119798919	GTGAGCCACTGTGCCTGGCCNNNNNNNN
chrX	chrX	16	ATGAGCCACTGTGCCCAGCCTTGAGTGG	3	112015817	112015845	GTGAGCCACTGTGCCTGGCCNNNNNNNN
chrX	chrX	16	TTGAGCCACTGTGCCTGGCCCTGAATGC	1	108353021	108353049	GTGAGCCACTGTGCCTGGCCNNNNNNNN
chrX	chrX	16	GTGAGCCACGGTGCCTGGCCAGGAGTAG	1	100585105	100585133	GTGAGCCACTGTGCCTGGCCNNNNNNNN
chr9	chr9	16	GTGAGCCACTGTGCCTGGCCTGGAAAAC	0	89078332	89078360	GTGAGCCACTGTGCCTGGCCNNNNNNNN
chr9	chr9	16	ATGAGCCACTGTGCCTGGCCAGGAATAT	1	86667755	86667783	GTGAGCCACTGTGCCTGGCCNNNNNNNN
chr9	chr9	16	ATGAGCCACTGCACCTGGCCAAGAGTGT	3	130950871	130950899	GTGAGCCACTGTGCCTGGCCNNNNNNNN
chr8	chr8	16	GTGAGCCACTGTGCCTGGCCAAGAAGCA	0	96375921	96375949	GTGAGCCACTGTGCCTGGCCNNNNNNNN
chr8	chr8	16	GTGAGCCACTGCGCCCGGCCTGGGGTCT	2	125468783	125468811	GTGAGCCACTGTGCCTGGCCNNNNNNNN
chr7	chr7	16	GTGAGCCACTGTGCCCAGCCAAGAGTTG	2	96873227	96873255	GTGAGCCACTGTGCCTGGCCNNNNNNNN
chr7	chr7	16	GTGAGCCACTGTGCCTGGCCATGATTTT	0	152043921	152043949	GTGAGCCACTGTGCCTGGCCNNNNNNNN
chr7	chr7	16	GTGAGCCACTGTGCCTGGCCAAGACTAC	0	151337106	151337134	GTGAGCCACTGTGCCTGGCCNNNNNNNN
chr6	chr6	16	GTGAGCCACTGTGCCTGGCCTTGAATAG	0	51661891	51661919	GTGAGCCACTGTGCCTGGCCNNNNNNNN
chr6	chr6	16	GTGAGCCACTGTGCCTGGCCAGGAATAA	0	37658264	37658292	GTGAGCCACTGTGCCTGGCCNNNNNNNN
chr6	chr6	16	GTGAGCCACTGTGCCTGGCCATGATTGG	0	34862138	34862166	GTGAGCCACTGTGCCTGGCCNNNNNNNN
chr6	chr6	16	TTGAGCCACTGTGCCTGGCCAAGAAATT	1	153329005	153329033	GTGAGCCACTGTGCCTGGCCNNNNNNNN
chr6	chr6	16	GTGAGCCACTGTGCCTGGCCTGGAACAG	0	13319401	13319429	GTGAGCCACTGTGCCTGGCCNNNNNNNN
chr5	chr5	16	GTAAGCCACTGTGCCTGGCCAAGAATAT	1	92987121	92987149	GTGAGCCACTGTGCCTGGCCNNNNNNNN
chr5	chr5	16	GTGAGCCACTGTGCCTGGCCTAGGAGGT	0	88077995	88078023	GTGAGCCACTGTGCCTGGCCNNNNNNNN
chr5	chr5	16	ATGAGCCACTGTGCCCAGCCAGGAGTTC	3	153650264	153650292	GTGAGCCACTGTGCCTGGCCNNNNNNNN
chr5	chr5	16	ATGAGCCACTGTGCCTGGCCTGGGGCCT	1	139108156	139108184	GTGAGCCACTGTGCCTGGCCNNNNNNNN
chr5	chr5	16	GTGAGCCACTGTGCCCAGCCGAGAGATG	2	137405578	137405606	GTGAGCCACTGTGCCTGGCCNNNNNNNN
chr5	chr5	16	GTGAGCTACTGTGCCTGGCCTAGAGTTT	1	135317068	135317096	GTGAGCCACTGTGCCTGGCCNNNNNNNN
chr5	chr5	16	GTGAGCCACCATGCCTGGCCCAGAGTTT	2	132512752	132512780	GTGAGCCACTGTGCCTGGCCNNNNNNNN
chr5	chr5	16	GTGAGCCACCATGCCTGGCCAGGAATGC	2	132008699	132008727	GTGAGCCACTGTGCCTGGCCNNNNNNNN
chr4	chr4	16	GTGAGCCACTGCGCCTGGCCAAGAGCTT	1	83171873	83171901	GTGAGCCACTGTGCCTGGCCNNNNNNNN
chr4	chr4	16	GTGAGCCACTGTGCCTGGCCTTGAGATG	0	58008754	58008782	GTGAGCCACTGTGCCTGGCCNNNNNNNN
chr4	chr4	16	GTGAGCCACTGTGCCTAGCCTTGAATAA	1	13099598	13099626	GTGAGCCACTGTGCCTGGCCNNNNNNNN
chr3	chr3	16	ATGAGCCACTGTGCCCAGCCCAGAGTAT	3	38303775	38303803	GTGAGCCACTGTGCCTGGCCNNNNNNNN
chr3	chr3	16	GTAAGCCACTGTGCCTGGCCTAGAATTT	1	32311693	32311721	GTGAGCCACTGTGCCTGGCCNNNNNNNN
chr2	chr2	16	GTGAGCCATTGTGCCTGGCCCAGAGGAC	1	89889621	89889649	GTGAGCCACTGTGCCTGGCCNNNNNNNN
chr2	chr2	16	GTGAGCCACTGTGCCTGGCCGAGACTCA	0	35617989	35618017	GTGAGCCACTGTGCCTGGCCNNNNNNNN
chr22	chr22	16	GTGAGCCACTGTGCCCAGCCATGAGTCC	2	41970548	41970576	GTGAGCCACTGTGCCTGGCCNNNNNNNN
chr22	chr22	16	GTGAGCCACCGTGCCCGGCCAAGAATTC	2	36909629	36909657	GTGAGCCACTGTGCCTGGCCNNNNNNNN
chr22	chr22	16	GTGAGCCACTGCGCCCAGCCAAGAGTTT	3	34383766	34383794	GTGAGCCACTGTGCCTGGCCNNNNNNNN
chr2	chr2	16	GTGAGCCACTGTGCCCGGCCCTGAGTTA	1	184359293	184359321	GTGAGCCACTGTGCCTGGCCNNNNNNNN
chr2	chr2	16	GTGAGCCACCGTGCCTGGCCCAGAGTTT	1	109713471	109713499	GTGAGCCACTGTGCCTGGCCNNNNNNNN
chr20	chr20	16	GTGAGCCACTGTGCCCAGCCCAGGGTGT	2	32771606	32771634	GTGAGCCACTGTGCCTGGCCNNNNNNNN
chr20	chr20	16	GTGAGCCACTGTGCCTGGCCAGGATCTC	0	3133263	3133291	GTGAGCCACTGTGCCTGGCCNNNNNNNN
chr20	chr20	16	GTGAGCCACTGTGCCCAGCCCAGAAACA	2	30248863	30248891	GTGAGCCACTGTGCCTGGCCNNNNNNNN
chr19	chr19	16	GTGAGCCACCATGCCTGGCCTGGAGTGT	2	38020674	38020702	GTGAGCCACTGTGCCTGGCCNNNNNNNN
chr19	chr19	16	GTGAGCTACTGTGCCCAGCCAAGAGTCA	3	10916905	10916933	GTGAGCCACTGTGCCTGGCCNNNNNNNN
chr18	chr18	16	GTGAGCCACTGTGCCTGGCCTAGATATG	0	36126002	36126030	GTGAGCCACTGTGCCTGGCCNNNNNNNN
chr18	chr18	16	GTGAGCCACCGTGCCTGACCAGGAGTAG	2	19739917	19739945	GTGAGCCACTGTGCCTGGCCNNNNNNNN
chr18	chr18	16	GTGAGCCACTGTGCCTGGCCTGGAACTT	0	18703178	18703206	GTGAGCCACTGTGCCTGGCCNNNNNNNN
chr1	chr1	16	GTGAGCCACTGTGCCTGGCCGAGAGAGA	0	8172143	8172171	GTGAGCCACTGTGCCTGGCCNNNNNNNN
chr17	chr17	16	GTGAGCCACTGTGCCCAGCCAAGAGTTC	2	9984750	9984778	GTGAGCCACTGTGCCTGGCCNNNNNNNN
chr17	chr17	16	GTGAGCCACTGCGCCTGGCCTGGATTCC	1	75515119	75515147	GTGAGCCACTGTGCCTGGCCNNNNNNNN
chr17	chr17	16	GTGAGCCACCGTGCCTGGCCCAGAAATG	1	49075670	49075698	GTGAGCCACTGTGCCTGGCCNNNNNNNN
chr17	chr17	16	GTGAGCCACTGTGCCCAGCCAAGAATCT	2	1432858	1432886	GTGAGCCACTGTGCCTGGCCNNNNNNNN
chr17	chr17	16	GTGAGCCACCGTGCCTGGCCAAGAGGTA	1	13051752	13051780	GTGAGCCACTGTGCCTGGCCNNNNNNNN
chr16	chr16	16	GTGAGCCACTGCGCCTGGCCATGAGTCT	1	9198239	9198267	GTGAGCCACTGTGCCTGGCCNNNNNNNN
chr16	chr16	16	GTGAGCCACTGTGCCTGGCCCGGAGTGT	0	89719738	89719766	GTGAGCCACTGTGCCTGGCCNNNNNNNN
chr16	chr16	16	ATGAGCCACCGTGCCTGGCCAGGAATTT	2	87531703	87531731	GTGAGCCACTGTGCCTGGCCNNNNNNNN
chr16	chr16	16	GTGAGCCACTGTGCCTGGCCTGGAATGT	0	71370920	71370948	GTGAGCCACTGTGCCTGGCCNNNNNNNN
chr16	chr16	16	GTGAGCCACCGTGCCTGGCCGTGAGTAT	1	2765046	2765074	GTGAGCCACTGTGCCTGGCCNNNNNNNN
chr16	chr16	16	GTGAGCCACTGCGCCTGGCCAGGAGTAA	1	25114401	25114429	GTGAGCCACTGTGCCTGGCCNNNNNNNN
chr16	chr16	16	ATGAGCCACTGTGCCTGGCCAGGAATGA	1	13656196	13656224	GTGAGCCACTGTGCCTGGCCNNNNNNNN
chr14	chr14	16	GTGAACCACTGTGCCCAGCCAGGAATTT	3	71228189	71228217	GTGAGCCACTGTGCCTGGCCNNNNNNNN
chr1	chr1	16	GTGAGCCACTGTGCCTGGACGAGGATAA	1	41173185	41173213	GTGAGCCACTGTGCCTGGCCNNNNNNNN
chr14	chr14	16	ATGAGCCACTGTGCCCGGCCAAGGGTTT	2	105301922	105301950	GTGAGCCACTGTGCCTGGCCNNNNNNNN
chr13	chr13	16	GTGAGCCACCGTGCCTGGCCAAGAAACA	1	50238097	50238125	GTGAGCCACTGTGCCTGGCCNNNNNNNN
chr13	chr13	16	GTGAGCCACTGTGCCTGGCCATGGGGCT	0	48719065	48719093	GTGAGCCACTGTGCCTGGCCNNNNNNNN
chr1	chr1	16	GTGAGCCACTGTGCCCGGCCCAGAGTAA	1	33851677	33851705	GTGAGCCACTGTGCCTGGCCNNNNNNNN
chr13	chr13	16	ATGAGCCACTGTGCCTGGCCATGAGGCA	1	25167535	25167563	GTGAGCCACTGTGCCTGGCCNNNNNNNN
chr12	chr12	16	ATGAGCCACTGTGCCTGGCCAAGAGCTC	1	80761034	80761062	GTGAGCCACTGTGCCTGGCCNNNNNNNN
chr12	chr12	16	GTGAGCCACTGTGCCCAGCCATGAGTTC	2	64962769	64962797	GTGAGCCACTGTGCCTGGCCNNNNNNNN
chr1	chr1	16	GTGAGCCACTGTGCCCGGCCCTGAATTC	1	235485093	235485121	GTGAGCCACTGTGCCTGGCCNNNNNNNN
chr1	chr1	16	ATGAGCCACTGTGCCTGGCCCAGAGCCT	1	235463440	235463468	GTGAGCCACTGTGCCTGGCCNNNNNNNN
chr1	chr1	16	GTGAGCCACTGTGCCTGGCCCAGAAATT	0	225764546	225764574	GTGAGCCACTGTGCCTGGCCNNNNNNNN
chr1	chr1	16	ATGAGCCACTGTGCCTGGCCAAGAGCTG	1	223391283	223391311	GTGAGCCACTGTGCCTGGCCNNNNNNNN
chr12	chr12	16	ATGAGCCACTGTGCCTGGCCACGAAATT	1	118900371	118900399	GTGAGCCACTGTGCCTGGCCNNNNNNNN
chr12	chr12	16	GTGAGCCACCATGCCTGGCCTGGAGTAA	2	118804604	118804632	GTGAGCCACTGTGCCTGGCCNNNNNNNN
chr12	chr12	16	GTGAGCCACTGTGCCCGGCCATGAATGT	1	102026792	102026820	GTGAGCCACTGTGCCTGGCCNNNNNNNN
chr1	chr1	16	GTGAGCCACTGTGCCCAGCCAAGAATGT	2	204996475	204996503	GTGAGCCACTGTGCCTGGCCNNNNNNNN
chr11	chr11	16	GTGAGCCACTATGCCTGGCCTGGAACCT	1	93386171	93386199	GTGAGCCACTGTGCCTGGCCNNNNNNNN
chr1	chr1	16	GTGAGCCACTGTGCCCAGCCAGGAATAT	2	172690132	172690160	GTGAGCCACTGTGCCTGGCCNNNNNNNN
chr11	chr11	16	GTGAGCCACCGTGCCTGGCCTGGAATGC	1	36129570	36129598	GTGAGCCACTGTGCCTGGCCNNNNNNNN
chr10	chr10	16	GTGAGCTACTGTGCCTGGCCTAGAGTTT	1	30051920	30051948	GTGAGCCACTGTGCCTGGCCNNNNNNNN
chr10	chr10	16	GTGAGCCACTGCGCCCGGCCTGGAGTGC	2	15213798	15213826	GTGAGCCACTGTGCCTGGCCNNNNNNNN
chr10	chr10	16	GTGAGCCACTGTGCCTGGCCAGGGGCAT	0	110432932	110432960	GTGAGCCACTGTGCCTGGCCNNNNNNNN
chr10	chr10	16	GTGAGCCACTGTGCCTGGCCAGGAGAGG	0	104910930	104910958	GTGAGCCACTGTGCCTGGCCNNNNNNNN
chrX	chrX	15	ATGAGCCACTGTGCCTGGCCTGGAATTT	1	68814935	68814963	GTGAGCCACTGTGCCTGGCCNNNNNNNN
chr9	chr9	15	GTGAGCCACTGTGCCTGGCCTGGGATAT	0	96369844	96369872	GTGAGCCACTGTGCCTGGCCNNNNNNNN
chr9	chr9	15	ATGAGCCACTGTGCCTGGCTCAGAGTTT	2	36628159	36628187	GTGAGCCACTGTGCCTGGCCNNNNNNNN
chr9	chr9	15	GTGAGCCATTGTGCCTGGCCAAGGATAG	1	33181127	33181155	GTGAGCCACTGTGCCTGGCCNNNNNNNN
chr9	chr9	15	GTGAGCCACTGTGCCCGGCCTTGAATTT	1	20525204	20525232	GTGAGCCACTGTGCCTGGCCNNNNNNNN
chr9	chr9	15	GTGAGCCACTGTGCCTGGCCTTGAAATT	0	127506215	127506243	GTGAGCCACTGTGCCTGGCCNNNNNNNN
chr9	chr9	15	GTGAGCCACTGTGCCTGGCCAGGAGAGC	0	124623635	124623663	GTGAGCCACTGTGCCTGGCCNNNNNNNN
chr9	chr9	15	GTGAGCCACCATGCCTGGCCTAGAGTTG	2	101038073	101038101	GTGAGCCACTGTGCCTGGCCNNNNNNNN
chr8	chr8	15	ATGAGCCACTGTGCCTGGCCCTGAGTCA	1	9100218	9100246	GTGAGCCACTGTGCCTGGCCNNNNNNNN
chr8	chr8	15	GTGAGCCACTGCGCCTGGCCCAGAATCA	1	144705771	144705799	GTGAGCCACTGTGCCTGGCCNNNNNNNN
chr8	chr8	15	ATGAGCCACTGTGCCTGGCCTCGAATTA	1	121099336	121099364	GTGAGCCACTGTGCCTGGCCNNNNNNNN
chr8	chr8	15	GTGAGCCACTGTGCCTGGCCTAGAAGCT	0	107776591	107776619	GTGAGCCACTGTGCCTGGCCNNNNNNNN
chr7	chr7	15	GTGAGCCACTGTGCCTGGCCGGGATTCA	0	99789857	99789885	GTGAGCCACTGTGCCTGGCCNNNNNNNN
chr7	chr7	15	GTGAGCCACTGCGCCCAGCCAAGGGTCA	3	75668673	75668701	GTGAGCCACTGTGCCTGGCCNNNNNNNN
chr7	chr7	15	ATGAGCCACTGTGCCCGGCCCTGGGTTG	2	70977270	70977298	GTGAGCCACTGTGCCTGGCCNNNNNNNN
chr7	chr7	15	ATGAGCCACTGTGCCTGGCCTGGAGCAT	1	5543309	5543337	GTGAGCCACTGTGCCTGGCCNNNNNNNN
chr7	chr7	15	GTGAGCCACCGTGCCTGGCCAAGAAATT	1	128861213	128861241	GTGAGCCACTGTGCCTGGCCNNNNNNNN
chr7	chr7	15	GTGAGCCACTGCGCCTGGCCCTGAGTTT	1	116415467	116415495	GTGAGCCACTGTGCCTGGCCNNNNNNNN
chr7	chr7	15	GTGAGCCACTGTGCCTGGCCAGGACTCT	0	107590386	107590414	GTGAGCCACTGTGCCTGGCCNNNNNNNN
chr6	chr6	15	GTGAGCCACTATACCTGGCCTTGAGTTA	2	97311838	97311866	GTGAGCCACTGTGCCTGGCCNNNNNNNN
chr6	chr6	15	GTGAGCCACTGTGCCCGGCCAAGAGTGT	1	34322209	34322237	GTGAGCCACTGTGCCTGGCCNNNNNNNN
chr6	chr6	15	GTGAGCCACTGCGCCCAGCCTCGAATGT	3	28842676	28842704	GTGAGCCACTGTGCCTGGCCNNNNNNNN
chr6	chr6	15	GTGAGCCACCGTGCCTGGCCTTGAGTGT	1	21776928	21776956	GTGAGCCACTGTGCCTGGCCNNNNNNNN
chr6	chr6	15	GTGAGCCACCATGCCTGGCCTGGAGTTT	2	18535136	18535164	GTGAGCCACTGTGCCTGGCCNNNNNNNN
chr6	chr6	15	GTGAGCCACTGTGCCTGGCCTAGGAGCT	0	144422139	144422167	GTGAGCCACTGTGCCTGGCCNNNNNNNN
chr6	chr6	15	GTGAACCACTGTGCCCGGCCGAGAGATA	2	142490185	142490213	GTGAGCCACTGTGCCTGGCCNNNNNNNN
chr6	chr6	15	ATGAGCCACCGTGCCTGGCCAAGAGTTT	2	118820538	118820566	GTGAGCCACTGTGCCTGGCCNNNNNNNN
chr5	chr5	15	GTGAGCCACTGTGCCTGGCCCTGGGTTT	0	80749554	80749582	GTGAGCCACTGTGCCTGGCCNNNNNNNN
chr5	chr5	15	GTGAGCCACTGTGCCAGGCCAGGAGTGT	1	41905651	41905679	GTGAGCCACTGTGCCTGGCCNNNNNNNN
chr4	chr4	15	GTGAGCCACTATGCCTGGCCCTGAATTA	1	99281932	99281960	GTGAGCCACTGTGCCTGGCCNNNNNNNN
chr4	chr4	15	GTGAGCCACTGTGCCCGGCCCAGAGTTT	1	40622234	40622262	GTGAGCCACTGTGCCTGGCCNNNNNNNN
chr4	chr4	15	GTGAACCATTGTGCCTGGCCATGAATTT	2	136625658	136625686	GTGAGCCACTGTGCCTGGCCNNNNNNNN
chr4	chr4	15	ATGAGCCACTGTGCCTGGCCAAGAATAC	1	110879794	110879822	GTGAGCCACTGTGCCTGGCCNNNNNNNN
chr4	chr4	15	GTGAGCCACCGCGCCTGGCCAAGAATTC	2	110339028	110339056	GTGAGCCACTGTGCCTGGCCNNNNNNNN
chr3	chr3	15	GTGAGCCACTGCGCCTGGCCTGGAGTTG	1	75568760	75568788	GTGAGCCACTGTGCCTGGCCNNNNNNNN
chr3	chr3	15	GTGAGCCACCGTGCCTGGCCGGGGATTA	1	71184119	71184147	GTGAGCCACTGTGCCTGGCCNNNNNNNN
chr3	chr3	15	GTGAGCCACAGTGCCTGGCCTAGAATAG	1	49402855	49402883	GTGAGCCACTGTGCCTGGCCNNNNNNNN
chr3	chr3	15	ATGAGCCACCGTGCCTGGCCCAGAGTCC	2	47263843	47263871	GTGAGCCACTGTGCCTGGCCNNNNNNNN
chr3	chr3	15	GTGAGCCACCGTGCCTGGCCTAGAATAT	1	172410434	172410462	GTGAGCCACTGTGCCTGGCCNNNNNNNN
chr2	chr2	15	GTGAGCCACTGCGCCTGGCCAAGAACAT	1	97488019	97488047	GTGAGCCACTGTGCCTGGCCNNNNNNNN
chr2	chr2	15	ATGAGCCACTGTGCCCGGCCAGGGATCA	2	85928400	85928428	GTGAGCCACTGTGCCTGGCCNNNNNNNN
chr2	chr2	15	GTGAGCCACTGTGCCCAGCCTGGAAATC	2	25220431	25220459	GTGAGCCACTGTGCCTGGCCNNNNNNNN
chr2	chr2	15	ATGAGCCACTGTGCCTGGCCTGGAATGA	1	231457053	231457081	GTGAGCCACTGTGCCTGGCCNNNNNNNN
chr22	chr22	15	GTGAGCCACTGTGCCTGGCCGAGAACTA	0	23694153	23694181	GTGAGCCACTGTGCCTGGCCNNNNNNNN
chr2	chr2	15	ATGAGCCACTGTGCCTGGCCCAGAATAT	1	128582012	128582040	GTGAGCCACTGTGCCTGGCCNNNNNNNN
chr21	chr21	15	GTGAGCCACTGCGCCTGGCCTGGAATAC	1	22908990	22909018	GTGAGCCACTGTGCCTGGCCNNNNNNNN
chr20	chr20	15	ATGAGCCACTGCGCCTGGCCAAGAGTGT	2	54930564	54930592	GTGAGCCACTGTGCCTGGCCNNNNNNNN
chr20	chr20	15	GTGAGCCACTGAGCCTGGCCAGGAGTTG	1	43910465	43910493	GTGAGCCACTGTGCCTGGCCNNNNNNNN
chr20	chr20	15	GTGAGCCACTGCGCCTGGCCTGGAATAG	1	43285777	43285805	GTGAGCCACTGTGCCTGGCCNNNNNNNN
chr20	chr20	15	GTGAGCCACTGTGCCTGGCCATGAACTC	0	30187254	30187282	GTGAGCCACTGTGCCTGGCCNNNNNNNN
chr20	chr20	15	GTGAGCCACCGTGCCTGGCCAAGAGCCT	1	2800501	2800529	GTGAGCCACTGTGCCTGGCCNNNNNNNN
chr19	chr19	15	GTGAGCCATTGTGCCTGGCCTAGAATGC	1	58617478	58617506	GTGAGCCACTGTGCCTGGCCNNNNNNNN
chr19	chr19	15	GTGAGCCACTGTGCCTGGCCATGAGCCT	0	30025331	30025359	GTGAGCCACTGTGCCTGGCCNNNNNNNN
chr19	chr19	15	GTGAGCCACTGTGCCTGGCCGGGGAACT	0	16663423	16663451	GTGAGCCACTGTGCCTGGCCNNNNNNNN
chr19	chr19	15	GTGAGCCACCATGCCTGGCCATGAGTTC	2	14541133	14541161	GTGAGCCACTGTGCCTGGCCNNNNNNNN
chr18	chr18	15	GTGAGCCACTGCGCCTGGCCCAGAGTTC	1	41503392	41503420	GTGAGCCACTGTGCCTGGCCNNNNNNNN
chr18	chr18	15	ATGAGCCACTGCGCCTGGCCAAGAATGA	2	28617577	28617605	GTGAGCCACTGTGCCTGGCCNNNNNNNN
chr18	chr18	15	GTGAGCCACTGCGCCCAGCCCAGAGTTG	3	19196225	19196253	GTGAGCCACTGTGCCTGGCCNNNNNNNN
chr17	chr17	15	ATGAGCCACCGTGCCTGGCCTCGAGTGC	2	75829080	75829108	GTGAGCCACTGTGCCTGGCCNNNNNNNN
chr17	chr17	15	GTGAGCCACTGTGCCCGGCCAAGAAGTG	1	66660287	66660315	GTGAGCCACTGTGCCTGGCCNNNNNNNN
chr17	chr17	15	GTGAGCCACCGTGCCTGGCCAGGAAACT	1	57068245	57068273	GTGAGCCACTGTGCCTGGCCNNNNNNNN
chr17	chr17	15	ATGAGCCACTGCGCCTGGCCAAGGGTGT	2	47017862	47017890	GTGAGCCACTGTGCCTGGCCNNNNNNNN
chr17	chr17	15	GTGAGCCACTGTGCCTGGCCAAAGGTGA	0	46038023	46038051	GTGAGCCACTGTGCCTGGCCNNNNNNNN
chr17	chr17	15	GTGAGCCACTGCGCCTGGCCAAGAATTT	1	40516780	40516808	GTGAGCCACTGTGCCTGGCCNNNNNNNN
chr17	chr17	15	GTGAGCCACCGTGCCCGGCCTAGAGTTA	2	29863222	29863250	GTGAGCCACTGTGCCTGGCCNNNNNNNN
chr1	chr1	15	GTGAGCCACTGCGCCTGGCCAAGAAATC	1	72986167	72986195	GTGAGCCACTGTGCCTGGCCNNNNNNNN
chr17	chr17	15	GTGAGCCACTGTGCCCAGCCAAGAAGCC	2	17906508	17906536	GTGAGCCACTGTGCCTGGCCNNNNNNNN
chr16	chr16	15	GTGAGCCACTGTGCCTGGCCCAGAGTGG	0	90137816	90137844	GTGAGCCACTGTGCCTGGCCNNNNNNNN
chr1	chr1	15	GTGAGCCACTGTACCCGGCCGGGAGTCC	2	68801670	68801698	GTGAGCCACTGTGCCTGGCCNNNNNNNN
chr16	chr16	15	TTGAGCCACTGTGCCTGGCCTTGGGTAA	1	70612634	70612662	GTGAGCCACTGTGCCTGGCCNNNNNNNN
chr16	chr16	15	GTGAGCCACTGTGCCCGGCCAGGAGTCT	1	1456848	1456876	GTGAGCCACTGTGCCTGGCCNNNNNNNN
chr16	chr16	15	GTGAGCCACTGCGCCTGGCCCAGAGTGG	1	14415308	14415336	GTGAGCCACTGTGCCTGGCCNNNNNNNN
chr16	chr16	15	GTGAGCCACTGTGCCCGGCCTAGGGTGA	1	11868938	11868966	GTGAGCCACTGTGCCTGGCCNNNNNNNN
chr15	chr15	15	GTGAGCCACCATGCCTGGCCATGAGTTT	2	84186237	84186265	GTGAGCCACTGTGCCTGGCCNNNNNNNN
chr15	chr15	15	GTGAGCCACTGTGCCTGGCCAGGAATAG	0	81067380	81067408	GTGAGCCACTGTGCCTGGCCNNNNNNNN
chr14	chr14	15	GTGAGCCACTGTGCCCGGCCTGGGATTC	1	89834382	89834410	GTGAGCCACTGTGCCTGGCCNNNNNNNN
chr14	chr14	15	GTGAGCCACTGTGCCCGGCCTAGAATGT	1	64013663	64013691	GTGAGCCACTGTGCCTGGCCNNNNNNNN
chr14	chr14	15	GTGAGCCACTGTGCCCGGCCCGGGGTCT	1	54952679	54952707	GTGAGCCACTGTGCCTGGCCNNNNNNNN
chr1	chr1	15	GTGAGCCACTGTGCCTGGCCCAGAACCC	0	44836321	44836349	GTGAGCCACTGTGCCTGGCCNNNNNNNN
chr14	chr14	15	GTGAACCACAGTGCCTGGCCCTGAATTT	2	38903907	38903935	GTGAGCCACTGTGCCTGGCCNNNNNNNN
chr14	chr14	15	GTGAGCCACCGTGCCTGGCCATGAATTA	1	33521244	33521272	GTGAGCCACTGTGCCTGGCCNNNNNNNN
chr14	chr14	15	GTGAGCCACTGTGCCTGGCCCTGAATGT	0	23418448	23418476	GTGAGCCACTGTGCCTGGCCNNNNNNNN
chr13	chr13	15	ATGAACCACTGTGCCCAGCCTGGAGTTT	4	57854860	57854888	GTGAGCCACTGTGCCTGGCCNNNNNNNN
chr13	chr13	15	GTGAGCCACTGCGCCTGGCCCAGAGTGA	1	28183572	28183600	GTGAGCCACTGTGCCTGGCCNNNNNNNN
chr12	chr12	15	GTGAGCCACCGTGCCTGGCCTGGGGTGT	1	93778222	93778250	GTGAGCCACTGTGCCTGGCCNNNNNNNN
chr12	chr12	15	ATGAGCCACTGTGCCTGGCCTGGAGTAA	1	89098592	89098620	GTGAGCCACTGTGCCTGGCCNNNNNNNN
chr1	chr1	15	GTGAGCCACCGTGCCTGGCCGTGATATG	1	28723483	28723511	GTGAGCCACTGTGCCTGGCCNNNNNNNN
chr12	chr12	15	GTGAGCCACTGCGCCCAGCCATGAATTT	3	7251850	7251878	GTGAGCCACTGTGCCTGGCCNNNNNNNN
chr12	chr12	15	ATGAGCCACCGTGCCTGGCCAAGAAATG	2	53635300	53635328	GTGAGCCACTGTGCCTGGCCNNNNNNNN
chr12	chr12	15	ATGAGCCACTGTGCCTGGCCTAGAATTT	1	49823518	49823546	GTGAGCCACTGTGCCTGGCCNNNNNNNN
chr12	chr12	15	GTGAGCCACCATGCCTGGCCTAGAGTGA	2	110420730	110420758	GTGAGCCACTGTGCCTGGCCNNNNNNNN
chr1	chr1	15	GTGAACCACTGTGCCCAGCCTTGAGTTT	3	205141722	205141750	GTGAGCCACTGTGCCTGGCCNNNNNNNN
chr1	chr1	15	GTGAGCCACTGTGCCCAGCCCTGAATAC	2	183322420	183322448	GTGAGCCACTGTGCCTGGCCNNNNNNNN
chr1	chr1	15	GTGAGCCACTGTGCCCAGCCAAGAGATG	2	180504174	180504202	GTGAGCCACTGTGCCTGGCCNNNNNNNN
chr1	chr1	15	GTGAGCCACTGCGCCCGGCCGAGGGTGT	2	166266745	166266773	GTGAGCCACTGTGCCTGGCCNNNNNNNN
chr11	chr11	15	GTGAGCCACCGTGCCTGGCCAAGAATGG	1	63913521	63913549	GTGAGCCACTGTGCCTGGCCNNNNNNNN
chr11	chr11	15	GTGAGCCACCGTGCCTGGCCCAGGATCT	1	61398459	61398487	GTGAGCCACTGTGCCTGGCCNNNNNNNN
chr11	chr11	15	GTGAGCCACTGTGCCTGGCCTGGAACTC	0	57274510	57274538	GTGAGCCACTGTGCCTGGCCNNNNNNNN
chr11	chr11	15	GTGAGCCACTGTGCCTGGCCAGGAATGT	0	4157729	4157757	GTGAGCCACTGTGCCTGGCCNNNNNNNN
chr1	chr1	15	GTGAGCCACCGTGCCTGGCCCGGGATTA	1	13869855	13869883	GTGAGCCACTGTGCCTGGCCNNNNNNNN
chr11	chr11	15	ATGAGCCACTGTGCCCGGCCTAGAGTGG	2	36152666	36152694	GTGAGCCACTGTGCCTGGCCNNNNNNNN
chr11	chr11	15	ATGAGCCACTGTGCCCAGCCAGGAATCT	3	16914297	16914325	GTGAGCCACTGTGCCTGGCCNNNNNNNN
chr11	chr11	15	GTGAGCCACTGTGCCTGGCCCTGAGTTT	0	102295126	102295154	GTGAGCCACTGTGCCTGGCCNNNNNNNN
chr11	chr11	15	GTGAGCCATCGTGCCTGGCCTTGAATTC	2	102230976	102231004	GTGAGCCACTGTGCCTGGCCNNNNNNNN
chr1	chr1	15	GTGAGCCACCGTGCCTGGCCTGGAGGGA	1	108693532	108693560	GTGAGCCACTGTGCCTGGCCNNNNNNNN
chr10	chr10	15	GTGAGCCACTGTGCCCAGCCTAGAATCA	2	81916539	81916567	GTGAGCCACTGTGCCTGGCCNNNNNNNN
chr10	chr10	15	GTGAGCCACCGTGCCTGGCCTGGAGGAG	1	75818838	75818866	GTGAGCCACTGTGCCTGGCCNNNNNNNN
chr10	chr10	15	GTGAGCCACTGTGCCTGGCCAAGAATTT	0	70345170	70345198	GTGAGCCACTGTGCCTGGCCNNNNNNNN
chr10	chr10	15	GTGAGCCACTGTGCCTGGCCCAGAGAAT	0	66098124	66098152	GTGAGCCACTGTGCCTGGCCNNNNNNNN
chr10	chr10	15	GTGAGCCACTGCGCCTGGCCAGGGATTT	1	61101157	61101185	GTGAGCCACTGTGCCTGGCCNNNNNNNN
chr10	chr10	15	ATGAGCCACTGTGCCTGGCCAAGAATTA	1	18818037	18818065	GTGAGCCACTGTGCCTGGCCNNNNNNNN
chr10	chr10	15	ATGAGCCACTGTGCCTGGCCCAGAGCTT	1	16594835	16594863	GTGAGCCACTGTGCCTGGCCNNNNNNNN
chrX	chrX	14	GTGAGCCACTGTGCCTGGCCAGGACTAC	0	70500777	70500805	GTGAGCCACTGTGCCTGGCCNNNNNNNN
chrX	chrX	14	GTGAGCCACCGTGCCCGGCCAAGAGTTC	2	134016944	134016972	GTGAGCCACTGTGCCTGGCCNNNNNNNN
chr9	chr9	14	GTGAGCCACTGTGCCTGGCCAAGAGAGT	0	90618032	90618060	GTGAGCCACTGTGCCTGGCCNNNNNNNN
chr9	chr9	14	GTGAGCCACCGTGCCTGGCCAGGAGTAT	1	36526660	36526688	GTGAGCCACTGTGCCTGGCCNNNNNNNN
chr9	chr9	14	GTGAGCCACTGTGCCCAGCCTGGGGTTA	2	108377444	108377472	GTGAGCCACTGTGCCTGGCCNNNNNNNN
chr8	chr8	14	GTGAGCCACTGTGCCCAGCCATGGGTAT	2	67367861	67367889	GTGAGCCACTGTGCCTGGCCNNNNNNNN
chr8	chr8	14	GTGAGCCACTGTGCCTGGCCGTGAAATT	0	30268534	30268562	GTGAGCCACTGTGCCTGGCCNNNNNNNN
chr8	chr8	14	GTGAGCCACTGTGCCTGGCCCAGGAGTC	0	105488003	105488031	GTGAGCCACTGTGCCTGGCCNNNNNNNN
chr8	chr8	14	GTGAGCCACTGTGCCTGGCCAGGAAATC	0	101726668	101726696	GTGAGCCACTGTGCCTGGCCNNNNNNNN
chr7	chr7	14	GTGAGCCACCGTGCCTGGCCATGAAGCT	1	99731233	99731261	GTGAGCCACTGTGCCTGGCCNNNNNNNN
chr7	chr7	14	GTGAGCCACTGTGCCTGGCTGAGAATTC	1	44793124	44793152	GTGAGCCACTGTGCCTGGCCNNNNNNNN
chr7	chr7	14	GTGAGCCACCGTGCCTGGCCAGGAATGA	1	30501633	30501661	GTGAGCCACTGTGCCTGGCCNNNNNNNN
chr7	chr7	14	ATGAGCCACTGTGCCTGGCCCTGAAATA	1	116703472	116703500	GTGAGCCACTGTGCCTGGCCNNNNNNNN
chr7	chr7	14	GTGAGCCACTGCGCCTGGCCTAGAGCTG	1	105422559	105422587	GTGAGCCACTGTGCCTGGCCNNNNNNNN
chr7	chr7	14	GTGAGTCACTGTGCCTGGCCAGGAATCA	1	103437831	103437859	GTGAGCCACTGTGCCTGGCCNNNNNNNN
chr7	chr7	14	GTGAGCCACTGCGCCTGGCCCTGGGTAC	1	102726341	102726369	GTGAGCCACTGTGCCTGGCCNNNNNNNN
chr7	chr7	14	GTGAGCCACTGTGCCTGGCCCTGAATAA	0	100114288	100114316	GTGAGCCACTGTGCCTGGCCNNNNNNNN
chr6	chr6	14	GTGAGCCACCGTGCCCGGCCAGGAATGC	2	7835611	7835639	GTGAGCCACTGTGCCTGGCCNNNNNNNN
chr6	chr6	14	GTGAGCCACCATGCCTGGCCTAGAGTCA	2	121910684	121910712	GTGAGCCACTGTGCCTGGCCNNNNNNNN
chr5	chr5	14	GTGAGCCACTGTGCCCAGCCAGGAATTT	2	93308944	93308972	GTGAGCCACTGTGCCTGGCCNNNNNNNN
chr5	chr5	14	GTGAGCCACTGTGCCTGGCCAGGAAGTA	0	64964146	64964174	GTGAGCCACTGTGCCTGGCCNNNNNNNN
chr5	chr5	14	GTGAGCCACTGTGCCTGGCCAGGATTTT	0	60640001	60640029	GTGAGCCACTGTGCCTGGCCNNNNNNNN
chr5	chr5	14	ATGAGCCACTGTGCCTGGCCTGGAGTAA	1	54974767	54974795	GTGAGCCACTGTGCCTGGCCNNNNNNNN
chr5	chr5	14	GTGAGCCACTGCGCCTGGCCAGGAGTCT	1	146813306	146813334	GTGAGCCACTGTGCCTGGCCNNNNNNNN
chr4	chr4	14	GTGAGCCACTGCGCCCGGCCAGGAGTAT	2	95127227	95127255	GTGAGCCACTGTGCCTGGCCNNNNNNNN
chr4	chr4	14	ATGAGCCACTGTGCCCAGCCAAGAAACA	3	84392640	84392668	GTGAGCCACTGTGCCTGGCCNNNNNNNN
chr4	chr4	14	GTGAGCCACTGTGCCTGGCTGAGAGTTA	1	47910154	47910182	GTGAGCCACTGTGCCTGGCCNNNNNNNN
chr4	chr4	14	GTGAGCCACTGTGCCTGGCCCAGATATT	0	41329486	41329514	GTGAGCCACTGTGCCTGGCCNNNNNNNN
chr4	chr4	14	GTGAGCCACTGCGCCTGGCCAGGAATAA	1	181486711	181486739	GTGAGCCACTGTGCCTGGCCNNNNNNNN
chr3	chr3	14	GTGAGCCACCGTGCCTGGCCCAGGGTTT	1	46265797	46265825	GTGAGCCACTGTGCCTGGCCNNNNNNNN
chr3	chr3	14	GTGAGCCACTGTGCCTGGCCAAGAGTTG	0	192511928	192511956	GTGAGCCACTGTGCCTGGCCNNNNNNNN
chr3	chr3	14	GTGAGCCACCGTGCCCAGCCGGGAGTTA	3	152728537	152728565	GTGAGCCACTGTGCCTGGCCNNNNNNNN
chr3	chr3	14	ATGAGCCACTGTGCCTGGCCTGGGGCTT	1	142618846	142618874	GTGAGCCACTGTGCCTGGCCNNNNNNNN
chr3	chr3	14	ATGAGTCACTGTGCCTGGCCAGGAATTT	2	136460589	136460617	GTGAGCCACTGTGCCTGGCCNNNNNNNN
chr3	chr3	14	GTGAGCCACCGTGCCCGGCCGAGGGTCT	2	134729683	134729711	GTGAGCCACTGTGCCTGGCCNNNNNNNN
chr3	chr3	14	ATGAGCCACTGTGCCTGGCCAGGAATTG	1	132043764	132043792	GTGAGCCACTGTGCCTGGCCNNNNNNNN
chr3	chr3	14	GTGAGCCACTATGCCTGGCCAAGAAATG	1	119393351	119393379	GTGAGCCACTGTGCCTGGCCNNNNNNNN
chr2	chr2	14	GTGAGCCACCGTGCCTGGCCAGGAGTCA	1	82302878	82302906	GTGAGCCACTGTGCCTGGCCNNNNNNNN
chr2	chr2	14	GTGAGCCACCATGCCTGGCCAGGGGTAA	2	71524650	71524678	GTGAGCCACTGTGCCTGGCCNNNNNNNN
chr2	chr2	14	GTGAGCCACTGTGCCTGGCCTAGAAATG	0	58340155	58340183	GTGAGCCACTGTGCCTGGCCNNNNNNNN
chr2	chr2	14	GTGAGGCACTGTGCCTGGCCTAGGGTAG	1	54947735	54947763	GTGAGCCACTGTGCCTGGCCNNNNNNNN
chr2	chr2	14	GTGAGCCACTGTGCCTGGCCATGACATG	0	233493050	233493078	GTGAGCCACTGTGCCTGGCCNNNNNNNN
chr22	chr22	14	GTGAGCCACTGTGCCTGGCCTAGAAGTG	0	30614628	30614656	GTGAGCCACTGTGCCTGGCCNNNNNNNN
chr22	chr22	14	ATGAGCCACTGTGCCTGGCCAAGAAATA	1	30075565	30075593	GTGAGCCACTGTGCCTGGCCNNNNNNNN
chr2	chr2	14	GTGAGCCACTGTGCCTGGCCGAGAGGTA	0	209069769	209069797	GTGAGCCACTGTGCCTGGCCNNNNNNNN
chr2	chr2	14	ATGAGCCACTGTGCCTGGCCTAGAAATT	1	184245885	184245913	GTGAGCCACTGTGCCTGGCCNNNNNNNN
chr2	chr2	14	GTGAGCCACCGTGCCTGGCCTAGAATCT	1	131900408	131900436	GTGAGCCACTGTGCCTGGCCNNNNNNNN
chr2	chr2	14	GTGAGCCACTGTGCCCAGCCAAGGATAT	2	113036175	113036203	GTGAGCCACTGTGCCTGGCCNNNNNNNN
chr20	chr20	14	GTGAGCCACTGTGCCCGGCCCAGAGTTT	1	42096759	42096787	GTGAGCCACTGTGCCTGGCCNNNNNNNN
chr20	chr20	14	GTGAGCCACTGCGCCTGGCCCAGGATTG	1	33170193	33170221	GTGAGCCACTGTGCCTGGCCNNNNNNNN
chr20	chr20	14	GTGAGCCACTGTGCCTGGCCCAGAAATC	0	30081492	30081520	GTGAGCCACTGTGCCTGGCCNNNNNNNN
chr20	chr20	14	GTGAGCCACTGCGCCTGGCCAAGGATTC	1	22901336	22901364	GTGAGCCACTGTGCCTGGCCNNNNNNNN
chr20	chr20	14	GTGAGCCACTGCGCCTGGCCAAGAGTTA	1	2028825	2028853	GTGAGCCACTGTGCCTGGCCNNNNNNNN
chr19	chr19	14	GTGAGCCACCATGCCTGGCCATGAGTAT	2	8797307	8797335	GTGAGCCACTGTGCCTGGCCNNNNNNNN
chr19	chr19	14	GTGAGCCACTGTGCCCAGCCGAGGATAT	2	56184564	56184592	GTGAGCCACTGTGCCTGGCCNNNNNNNN
chr19	chr19	14	GTGAGCCACTGTGCCCGGCCCTGAGTCT	1	5458237	5458265	GTGAGCCACTGTGCCTGGCCNNNNNNNN
chr19	chr19	14	GTGAACCACTGTGCCTGGCCTGGAATTA	1	51096554	51096582	GTGAGCCACTGTGCCTGGCCNNNNNNNN
chr19	chr19	14	GTGAGCCACCGTGCCTGGCCCAGAATCA	1	47210428	47210456	GTGAGCCACTGTGCCTGGCCNNNNNNNN
chr19	chr19	14	GTGAGCCACCGTGCCTGGCCTGGGAACA	1	2315694	2315722	GTGAGCCACTGTGCCTGGCCNNNNNNNN
chr19	chr19	14	ATGAGCCACTGTGCCTGGCCTTGAATAA	1	11705474	11705502	GTGAGCCACTGTGCCTGGCCNNNNNNNN
chr17	chr17	14	GTGAGCCACTGTGCCCAGCCAAGAGAAA	2	64741508	64741536	GTGAGCCACTGTGCCTGGCCNNNNNNNN
chr17	chr17	14	GTGAGCCACTGTGCCCGGCCAAGAGATT	1	4311997	4312025	GTGAGCCACTGTGCCTGGCCNNNNNNNN
chr17	chr17	14	GTGAGCCACTGTGCCCAGCCTCAGGTTG	2	42016839	42016867	GTGAGCCACTGTGCCTGGCCNNNNNNNN
chr17	chr17	14	GTGAGCCACCGTGCCTGGCCCTGGGTAG	1	41351671	41351699	GTGAGCCACTGTGCCTGGCCNNNNNNNN
chr17	chr17	14	GTGAGCCACTGCACCCGGCCTGGAGTTC	3	41304447	41304475	GTGAGCCACTGTGCCTGGCCNNNNNNNN
chr17	chr17	14	ATGAGCCACTGTGCCTGGCCAAGAAAGC	1	37518562	37518590	GTGAGCCACTGTGCCTGGCCNNNNNNNN
chr16	chr16	14	ATGAGCCACTGTGCCTGGCCAAGGGCCA	1	71904662	71904690	GTGAGCCACTGTGCCTGGCCNNNNNNNN
chr16	chr16	14	GTGAGCCACTGTGCCCGGCCCAGAGTGG	1	13965188	13965216	GTGAGCCACTGTGCCTGGCCNNNNNNNN
chr15	chr15	14	GTGAGCCACTGTGCCTGGCCCAGAGGAT	0	41543309	41543337	GTGAGCCACTGTGCCTGGCCNNNNNNNN
chr14	chr14	14	GTGAGCCATTGTGCCTGGTCGAGGGTAT	2	78309172	78309200	GTGAGCCACTGTGCCTGGCCNNNNNNNN
chr14	chr14	14	GTGAGCCACTGTGCCTGGCCTAAAGTAG	0	73907970	73907998	GTGAGCCACTGTGCCTGGCCNNNNNNNN
chr14	chr14	14	GTGAGACACTGTGCCTGGCCTGGGGTCT	1	58607008	58607036	GTGAGCCACTGTGCCTGGCCNNNNNNNN
chr1	chr1	14	GTGAGCCACTGTGCCCGGCCTAGAATTC	1	40896423	40896451	GTGAGCCACTGTGCCTGGCCNNNNNNNN
chr13	chr13	14	GTGAGCCACCATGCCTGGCCAGGAGTTG	2	90556619	90556647	GTGAGCCACTGTGCCTGGCCNNNNNNNN
chr13	chr13	14	GTGAGCCACTGTGCCTGGCCAGGATTCT	0	87072794	87072822	GTGAGCCACTGTGCCTGGCCNNNNNNNN
chr1	chr1	14	ATGAGCCACTGTGCCTGGCCAAGAGCGG	1	37987872	37987900	GTGAGCCACTGTGCCTGGCCNNNNNNNN
chr13	chr13	14	ATGAGCCACTGTGCCTAGCCAAGAGTTA	2	32966532	32966560	GTGAGCCACTGTGCCTGGCCNNNNNNNN
chr13	chr13	14	GTGAGCCACTGTGCCCAGCCAAGAAACT	2	30352183	30352211	GTGAGCCACTGTGCCTGGCCNNNNNNNN
chr13	chr13	14	GTGAGCCACTGTGCCTGGCCTGGAGTCA	0	20677649	20677677	GTGAGCCACTGTGCCTGGCCNNNNNNNN
chr12	chr12	14	GTGAGCCACTGTGCCCGGCCGAGAATTA	1	93912393	93912421	GTGAGCCACTGTGCCTGGCCNNNNNNNN
chr12	chr12	14	GTGAGCCACCGTGCCTGGCCGAGAATAT	1	93193272	93193300	GTGAGCCACTGTGCCTGGCCNNNNNNNN
chr12	chr12	14	GTGAGCCACTGTGCCCGGCCAAGAATAC	1	61927637	61927665	GTGAGCCACTGTGCCTGGCCNNNNNNNN
chr12	chr12	14	GTGAGCCACTGTGCCCAGCCATGAGATC	2	25654204	25654232	GTGAGCCACTGTGCCTGGCCNNNNNNNN
chr1	chr1	14	GTGAGCCACCGTGCCTGGCCGAGAGCAA	1	2143303	2143331	GTGAGCCACTGTGCCTGGCCNNNNNNNN
chr1	chr1	14	GTGAGCCACTGCGCCTGGCCTGGGATGT	1	212906490	212906518	GTGAGCCACTGTGCCTGGCCNNNNNNNN
chr1	chr1	14	GTGAGCCACCGTGCCTGGCCAGGAATTA	1	212112619	212112647	GTGAGCCACTGTGCCTGGCCNNNNNNNN
chr12	chr12	14	GTAAGCCACTGTGCCTGGCCCGGGGGTG	1	110306814	110306842	GTGAGCCACTGTGCCTGGCCNNNNNNNN
chr1	chr1	14	ATGAGCCACTGCGCCTGGCCAAGAGTGG	2	19963103	19963131	GTGAGCCACTGTGCCTGGCCNNNNNNNN
chr1	chr1	14	GTGAGCCACTGTGCCCAACCGTGAGTCC	3	178916291	178916319	GTGAGCCACTGTGCCTGGCCNNNNNNNN
chr11	chr11	14	GTGAGCCACCATGCCTGGCCAAGAGTGA	2	78270060	78270088	GTGAGCCACTGTGCCTGGCCNNNNNNNN
chr11	chr11	14	GTGAGCCACTGTGCCTGGCCAGGAGCCG	0	64820063	64820091	GTGAGCCACTGTGCCTGGCCNNNNNNNN
chr11	chr11	14	GTGAGCCACCATGCCTGGCCTTGAGTCT	2	62449227	62449255	GTGAGCCACTGTGCCTGGCCNNNNNNNN
chr1	chr1	14	GTGAGCCACCATGCCTGGCCAGGAATCT	2	155492995	155493023	GTGAGCCACTGTGCCTGGCCNNNNNNNN
chr11	chr11	14	GTGAGCCACTGTGCCCAGCCATGAATTT	2	24952469	24952497	GTGAGCCACTGTGCCTGGCCNNNNNNNN
chr10	chr10	14	GTGAGCCACTGTGCCCAGCCCAGAATAA	2	75959951	75959979	GTGAGCCACTGTGCCTGGCCNNNNNNNN
chr10	chr10	14	GTGAGCCACTGTGCCTGGCCAGGGGTCT	0	29600938	29600966	GTGAGCCACTGTGCCTGGCCNNNNNNNN
chr10	chr10	14	GTGAGCCACTATGCCTGGCCAAGAAAAG	1	126456264	126456292	GTGAGCCACTGTGCCTGGCCNNNNNNNN
chr10	chr10	14	GTGAGCCACTGTGCCCGGCCTGGAGTAT	1	10794363	10794391	GTGAGCCACTGTGCCTGGCCNNNNNNNN
chrX	chrX	13	GTAAGCCACTGTGCCTGGCCTAGAATAG	1	96347893	96347921	GTGAGCCACTGTGCCTGGCCNNNNNNNN
chrX	chrX	13	GTGAGCCACGGTGCCCAGCCAAGAGTTC	3	7030983	7031011	GTGAGCCACTGTGCCTGGCCNNNNNNNN
chrX	chrX	13	GTGAGCCACAGTGCCTGGCCATGAATGG	1	6839135	6839163	GTGAGCCACTGTGCCTGGCCNNNNNNNN
chrX	chrX	13	GTGAGCCACTGCGCCCGGCCGAGAGTTG	2	45696209	45696237	GTGAGCCACTGTGCCTGGCCNNNNNNNN
chrX	chrX	13	GTGAGCCACTGCGCCCAGCCCAGAGTTT	3	41350028	41350056	GTGAGCCACTGTGCCTGGCCNNNNNNNN
chrX	chrX	13	TTGAGCCACTGTGCCTGGCCATGGGCAG	1	23824999	23825027	GTGAGCCACTGTGCCTGGCCNNNNNNNN
chrX	chrX	13	GTGAGCCACCGTGCCTGGCCATGGATGA	1	110969739	110969767	GTGAGCCACTGTGCCTGGCCNNNNNNNN
chr9	chr9	13	ATGAGCCACTGTGCCTGGCCTAGAATTC	1	81141815	81141843	GTGAGCCACTGTGCCTGGCCNNNNNNNN
chr9	chr9	13	GTGAGCCACTGTGCCCGGCCTGGGGATT	1	36489805	36489833	GTGAGCCACTGTGCCTGGCCNNNNNNNN
chr9	chr9	13	GTGAGCCACTGCGCCTGGCCAAGAAATT	1	34135936	34135964	GTGAGCCACTGTGCCTGGCCNNNNNNNN
chr8	chr8	13	ATGAGCCACTGTGCCTGGCCAAGAAATA	1	86141745	86141773	GTGAGCCACTGTGCCTGGCCNNNNNNNN
chr8	chr8	13	GTGAGCCACCGTGCCTGGCCTGGAGTTT	1	23073966	23073994	GTGAGCCACTGTGCCTGGCCNNNNNNNN
chr8	chr8	13	ATGAGCCACTGTGCCTGGCCTAGAATAT	1	139098019	139098047	GTGAGCCACTGTGCCTGGCCNNNNNNNN
chr8	chr8	13	GTGAGCCACTGTGCCCAGCCCTGAGTGG	2	133753320	133753348	GTGAGCCACTGTGCCTGGCCNNNNNNNN
chr8	chr8	13	GTGAGCCACTGTGCCTGGCCAAGAATTT	0	119165017	119165045	GTGAGCCACTGTGCCTGGCCNNNNNNNN
chr7	chr7	13	GTGAGCCACTGAGCCTGGCCCAGAGTAG	1	9421582	9421610	GTGAGCCACTGTGCCTGGCCNNNNNNNN
chr7	chr7	13	ATGAGCCACTGTGCCCAGCCAGGAATTG	3	75215411	75215439	GTGAGCCACTGTGCCTGGCCNNNNNNNN
chr7	chr7	13	GTGAGCCACTGCACCTGGCCAAGAGTTA	2	72949673	72949701	GTGAGCCACTGTGCCTGGCCNNNNNNNN
chr7	chr7	13	GTGAGCCACTGTGCCTGGCCATGAAATT	0	64811050	64811078	GTGAGCCACTGTGCCTGGCCNNNNNNNN
chr7	chr7	13	GTGAGCCACTGCGCCTGGCCAAGGAACT	1	44527645	44527673	GTGAGCCACTGTGCCTGGCCNNNNNNNN
chr7	chr7	13	GTGAGCCACTGTGCCCGGCCTAGAGATA	1	157117292	157117320	GTGAGCCACTGTGCCTGGCCNNNNNNNN
chr7	chr7	13	GTGAGCCACTGTGCCCGGCCATGAAAAG	1	152560006	152560034	GTGAGCCACTGTGCCTGGCCNNNNNNNN
chr7	chr7	13	ATGAGCCACTGTGCCTGGCCAAGGGAGA	1	100708219	100708247	GTGAGCCACTGTGCCTGGCCNNNNNNNN
chr6	chr6	13	ATGAGCCACTGCGCCTGGCCAGGGGTTC	2	7863510	7863538	GTGAGCCACTGTGCCTGGCCNNNNNNNN
chr6	chr6	13	ATGAGCCACTGTGCCCGGCCAAGAATCA	2	45051206	45051234	GTGAGCCACTGTGCCTGGCCNNNNNNNN
chr6	chr6	13	GTGAGCCACCGTGCCTGGCCTTGAGTTG	1	43732925	43732953	GTGAGCCACTGTGCCTGGCCNNNNNNNN
chr6	chr6	13	GTGAGCCACTGCGCCTAGCCTAGAGTAC	2	163869469	163869497	GTGAGCCACTGTGCCTGGCCNNNNNNNN
chr6	chr6	13	ATGAGCCACTGTGCCTGGCCAAGGGAGG	1	157078797	157078825	GTGAGCCACTGTGCCTGGCCNNNNNNNN
chr6	chr6	13	GTGAACCACCGTGCCTGGCCAGGAGTGT	2	12974431	12974459	GTGAGCCACTGTGCCTGGCCNNNNNNNN
chr5	chr5	13	GTGAGCCACCGTGCCTGGCCTGGAATTG	1	87152898	87152926	GTGAGCCACTGTGCCTGGCCNNNNNNNN
chr5	chr5	13	GTGAGCCACTGTGCCCAGCCCTGAATTC	2	65069239	65069267	GTGAGCCACTGTGCCTGGCCNNNNNNNN
chr5	chr5	13	GTGAGCCACTGTGCCTGGCCAAGAAATT	0	36443597	36443625	GTGAGCCACTGTGCCTGGCCNNNNNNNN
chr5	chr5	13	GTGAGCCACTGTGCCCGGCCTGGGATTT	1	176376770	176376798	GTGAGCCACTGTGCCTGGCCNNNNNNNN
chr5	chr5	13	GTGAGCCACCGTGCCCAGCCAGGAATCT	3	171331853	171331881	GTGAGCCACTGTGCCTGGCCNNNNNNNN
chr5	chr5	13	GTGAGCCACCATGCCTGGCCCAGGGTCA	2	163884506	163884534	GTGAGCCACTGTGCCTGGCCNNNNNNNN
chr5	chr5	13	GTGAGCCACTGTGCCTGGCCAAGAAGAG	0	150696722	150696750	GTGAGCCACTGTGCCTGGCCNNNNNNNN
chr5	chr5	13	ATGAGCCACTGCGCCTGGCCTAGGGCTG	2	145421205	145421233	GTGAGCCACTGTGCCTGGCCNNNNNNNN
chr5	chr5	13	GTGAGCCACTGTGCCTGGCCAAAAGTCA	0	130228569	130228597	GTGAGCCACTGTGCCTGGCCNNNNNNNN
chr5	chr5	13	GTGAGCCACCGTGCCCAGCCTAGAATTT	3	122173396	122173424	GTGAGCCACTGTGCCTGGCCNNNNNNNN
chr4	chr4	13	GTGAGCCACTGTGCCTGGCCAGGAAGAT	0	42381437	42381465	GTGAGCCACTGTGCCTGGCCNNNNNNNN
chr4	chr4	13	GTGAGCCACTGTGCCTGGCCTAGAGTGC	0	40241208	40241236	GTGAGCCACTGTGCCTGGCCNNNNNNNN
chr4	chr4	13	ATGAGCCACTGTGCCTGGCCTAGAATTT	1	3136728	3136756	GTGAGCCACTGTGCCTGGCCNNNNNNNN
chr4	chr4	13	ATGAGCCACTGTGCCTGGCCAAGAGTAA	1	162621808	162621836	GTGAGCCACTGTGCCTGGCCNNNNNNNN
chr4	chr4	13	GTGAGCCACCGTGCCTGGCCAAGGATAT	1	16216624	16216652	GTGAGCCACTGTGCCTGGCCNNNNNNNN
chr3	chr3	13	ATGAGCCACTGTGCCTGGCCGAGAAATG	1	49596639	49596667	GTGAGCCACTGTGCCTGGCCNNNNNNNN
chr3	chr3	13	GTGAGCCACTGTGCCTGGTCATGAATAT	1	49517664	49517692	GTGAGCCACTGTGCCTGGCCNNNNNNNN
chr3	chr3	13	ATGAGCCACTGTGCCCAGCCATGAATAT	3	32779026	32779054	GTGAGCCACTGTGCCTGGCCNNNNNNNN
chr3	chr3	13	GTGAGCCACCGTGCCCAGCCGAGGGTCA	3	195952124	195952152	GTGAGCCACTGTGCCTGGCCNNNNNNNN
chr3	chr3	13	GTGAGCCACTGTGCCCAGCCAAGGATCC	2	15135491	15135519	GTGAGCCACTGTGCCTGGCCNNNNNNNN
chr2	chr2	13	GTGAGCCACTGTGCCCAGCCCAGAATCC	2	85454828	85454856	GTGAGCCACTGTGCCTGGCCNNNNNNNN
chr2	chr2	13	GTGAGCCACTGTGCCTGGCCAAGAATGA	0	70805776	70805804	GTGAGCCACTGTGCCTGGCCNNNNNNNN
chr2	chr2	13	ATGAGCCACTGTGCCTGGCCAAGAAATG	1	6047102	6047130	GTGAGCCACTGTGCCTGGCCNNNNNNNN
chr2	chr2	13	GTGAGCCACTGTGCCCGGCCTAGAAACA	1	44399775	44399803	GTGAGCCACTGTGCCTGGCCNNNNNNNN
chr2	chr2	13	GTGAGCCACTGTGCCTGGCCAGGAGAAT	0	33137606	33137634	GTGAGCCACTGTGCCTGGCCNNNNNNNN
chr2	chr2	13	ATGAGCCACTGTGCCTGGCCCTGAAGCA	1	26158510	26158538	GTGAGCCACTGTGCCTGGCCNNNNNNNN
chr22	chr22	13	GTGAGCCACTGCGCCTGGCCCTGAGCTG	1	41420301	41420329	GTGAGCCACTGTGCCTGGCCNNNNNNNN
chr22	chr22	13	GTGAGCCACTGTGCCTGGCCGAGGGGTC	0	40339988	40340016	GTGAGCCACTGTGCCTGGCCNNNNNNNN
chr22	chr22	13	ATGAGCCACTGTGCCCGGCCTGGAATGT	2	38160999	38161027	GTGAGCCACTGTGCCTGGCCNNNNNNNN
chr2	chr2	13	GTGAGCCACTGCGCCTGGCCCTGAGTTT	1	232555935	232555963	GTGAGCCACTGTGCCTGGCCNNNNNNNN
chr2	chr2	13	GTGAGCCACTGTGCCTGGCCTGGGATAT	0	232044094	232044122	GTGAGCCACTGTGCCTGGCCNNNNNNNN
chr2	chr2	13	GTGAGCCACTGCGCCTGGCCGAGAGGAT	1	228290558	228290586	GTGAGCCACTGTGCCTGGCCNNNNNNNN
chr2	chr2	13	GTGAGCCACTGTGCCCAGCCAAGGGACA	2	222951270	222951298	GTGAGCCACTGTGCCTGGCCNNNNNNNN
chr2	chr2	13	GTGAGCCACTGTGCCTGGCCCTGAATGA	0	218693808	218693836	GTGAGCCACTGTGCCTGGCCNNNNNNNN
chr21	chr21	13	GTGAGCCACTGTGCCCAGCCTTGAAATT	2	45275564	45275592	GTGAGCCACTGTGCCTGGCCNNNNNNNN
chr21	chr21	13	GTGAGCCACTGTGCCTGGCCAGGAAAGT	0	18127835	18127863	GTGAGCCACTGTGCCTGGCCNNNNNNNN
chr21	chr21	13	GTGAGCCACTGTGCCTGGCCTGGAAATT	0	17232753	17232781	GTGAGCCACTGTGCCTGGCCNNNNNNNN
chr2	chr2	13	GTGAGCCACTGTGCCTGGCCCTGATTTT	0	102362728	102362756	GTGAGCCACTGTGCCTGGCCNNNNNNNN
chr20	chr20	13	ATGAGCCACTGTGCCTGGCCTAGAATTT	1	33793954	33793982	GTGAGCCACTGTGCCTGGCCNNNNNNNN
chr20	chr20	13	GTGAGCCACTGTGCCTGGCCAAGAAAAC	0	30857895	30857923	GTGAGCCACTGTGCCTGGCCNNNNNNNN
chr20	chr20	13	ATGAGCCACTGTGCCTGGCCAAGAAGTA	1	30077192	30077220	GTGAGCCACTGTGCCTGGCCNNNNNNNN
chr19	chr19	13	GTGAGCCACTGTGCCTGGCCCAGAAACC	0	54583951	54583979	GTGAGCCACTGTGCCTGGCCNNNNNNNN
chr19	chr19	13	GTGAGCCACCGTGCCCAGCCTGGGGTTG	3	5223852	5223880	GTGAGCCACTGTGCCTGGCCNNNNNNNN
chr19	chr19	13	GTGAGCCACTGCGCCCGGCCAGGGGTCC	2	50469628	50469656	GTGAGCCACTGTGCCTGGCCNNNNNNNN
chr19	chr19	13	GTGAGCCACTGTGCCTGGCCCGGAGAGT	0	14881771	14881799	GTGAGCCACTGTGCCTGGCCNNNNNNNN
chr1	chr1	13	GTGAGCCACTGCACCTGGCCCGGAGTGT	2	8929898	8929926	GTGAGCCACTGTGCCTGGCCNNNNNNNN
chr18	chr18	13	GTGAGCCACTGTGCCTAGCCTTGGGTAT	1	8293960	8293988	GTGAGCCACTGTGCCTGGCCNNNNNNNN
chr18	chr18	13	GTGAGCCACCGTGCCTGGCCTGGAATTT	1	60476066	60476094	GTGAGCCACTGTGCCTGGCCNNNNNNNN
chr18	chr18	13	GTGAGCCACCATGCCTGACCAGGAGTTT	3	21193415	21193443	GTGAGCCACTGTGCCTGGCCNNNNNNNN
chr1	chr1	13	GTGAGCCACTGTGCCCGGCCTGGAATCT	1	8124860	8124888	GTGAGCCACTGTGCCTGGCCNNNNNNNN
chr17	chr17	13	ATGAGCCACTGTGCCTGGCCTAGGGGTA	1	71251348	71251376	GTGAGCCACTGTGCCTGGCCNNNNNNNN
chr17	chr17	13	GTGAGCCACTATGCCCGGCCAAGAATTG	2	63858416	63858444	GTGAGCCACTGTGCCTGGCCNNNNNNNN
chr17	chr17	13	GTGAGCCACTGCGCCTGGCCTCGAAATG	1	55255996	55256024	GTGAGCCACTGTGCCTGGCCNNNNNNNN
chr17	chr17	13	ATGAGCCACTGTGCCTGGCCAAGAAACA	1	38398933	38398961	GTGAGCCACTGTGCCTGGCCNNNNNNNN
chr17	chr17	13	GTGAGCCACCGTGCCTGGCCAGGAAACT	1	3701034	3701062	GTGAGCCACTGTGCCTGGCCNNNNNNNN
chr17	chr17	13	ATGAGCCACTGTGCCCAGCCTTGAGTCA	3	2662413	2662441	GTGAGCCACTGTGCCTGGCCNNNNNNNN
chr17	chr17	13	GTGAGCCACTGCGCCTGGCCTAGAAACA	1	1736858	1736886	GTGAGCCACTGTGCCTGGCCNNNNNNNN
chr16	chr16	13	GTGAGCCACCATGCCTGGCCAAGAATAT	2	78786447	78786475	GTGAGCCACTGTGCCTGGCCNNNNNNNN
chr16	chr16	13	ATGAGCCACTGTGCCTGGCCAAGAATAG	1	62197235	62197263	GTGAGCCACTGTGCCTGGCCNNNNNNNN
chr16	chr16	13	ATGAGCCACCGTGCCTGGCCAAGAGTGA	2	48237488	48237516	GTGAGCCACTGTGCCTGGCCNNNNNNNN
chr16	chr16	13	GTGAGCCACTGTGCCCGGCCTAGAGATG	1	2857338	2857366	GTGAGCCACTGTGCCTGGCCNNNNNNNN
chr16	chr16	13	GTGAGCCACTGTGCCTGGCCAGGAGGTG	0	23813437	23813465	GTGAGCCACTGTGCCTGGCCNNNNNNNN
chr15	chr15	13	GTGAGCCACCGTGCCTGGCCCAGAGAAT	1	99938969	99938997	GTGAGCCACTGTGCCTGGCCNNNNNNNN
chr15	chr15	13	GTGAACCACTGTGCCTGGCCAGGAATAA	1	86462718	86462746	GTGAGCCACTGTGCCTGGCCNNNNNNNN
chr15	chr15	13	ATGAGTCACTGTGCCTGGCCAAGAGTTC	2	74440822	74440850	GTGAGCCACTGTGCCTGGCCNNNNNNNN
chr15	chr15	13	GTGAGCCACTGCGCCCGGCCGAGAATGT	2	72263209	72263237	GTGAGCCACTGTGCCTGGCCNNNNNNNN
chr15	chr15	13	GTGAGCCACCGTGCCTGGCCTTGAATTT	1	66182674	66182702	GTGAGCCACTGTGCCTGGCCNNNNNNNN
chr15	chr15	13	GTGAGCCACCATGCCTGGCCCAGAGTCT	2	51722639	51722667	GTGAGCCACTGTGCCTGGCCNNNNNNNN
chr1	chr1	13	GTGAGCCACTGTGCCCGGCCTAGAACCT	1	52495751	52495779	GTGAGCCACTGTGCCTGGCCNNNNNNNN
chr14	chr14	13	GTGAGCTACTGCGCCCGGCCAAGAGTTG	3	78228366	78228394	GTGAGCCACTGTGCCTGGCCNNNNNNNN
chr14	chr14	13	GTGAGCCACCGCGCCTGGCCAAGAGTTC	2	74114960	74114988	GTGAGCCACTGTGCCTGGCCNNNNNNNN
chr14	chr14	13	GTGAGCCACTGCGCCCAGCCAAGAGTTC	3	45696421	45696449	GTGAGCCACTGTGCCTGGCCNNNNNNNN
chr14	chr14	13	GTGAGCCACTGCGCCTGGCCAAGAATGC	1	31894556	31894584	GTGAGCCACTGTGCCTGGCCNNNNNNNN
chr1	chr1	13	ATGAGCCACTGTGCCCAGCCAAGAGTGT	3	40461027	40461055	GTGAGCCACTGTGCCTGGCCNNNNNNNN
chr13	chr13	13	GTGAGCCACCGTGCCTGGCCCAGAAATC	1	92674533	92674561	GTGAGCCACTGTGCCTGGCCNNNNNNNN
chr13	chr13	13	GTGAGCCACTGTGCCTGGCCCTGGAGTA	0	28538246	28538274	GTGAGCCACTGTGCCTGGCCNNNNNNNN
chr1	chr1	13	ATGAGCCACTGTGCCTGGCCAAGAATTT	1	32721578	32721606	GTGAGCCACTGTGCCTGGCCNNNNNNNN
chr13	chr13	13	GTGAGCCACTGTGCCTGGCCAGGAAATA	0	24383761	24383789	GTGAGCCACTGTGCCTGGCCNNNNNNNN
chr13	chr13	13	GTGAGCCACTGTGCCTGGCCAGGAATTT	0	20558047	20558075	GTGAGCCACTGTGCCTGGCCNNNNNNNN
chr12	chr12	13	GTGAGCCACTGTGCCTGGCCAGGAATCA	0	54904717	54904745	GTGAGCCACTGTGCCTGGCCNNNNNNNN
chr12	chr12	13	GTGAGCCACTGTGCCTGGCCATGAATTA	0	50658645	50658673	GTGAGCCACTGTGCCTGGCCNNNNNNNN
chr12	chr12	13	GTGAGCCACTGCGCCTGGCCAAGGAACC	1	48448282	48448310	GTGAGCCACTGTGCCTGGCCNNNNNNNN
chr12	chr12	13	GTGAGCCACTGCGCCTGGCCAAGAATGC	1	4051465	4051493	GTGAGCCACTGTGCCTGGCCNNNNNNNN
chr12	chr12	13	GTGAGCCACCGTGCCTGGCCCTGGGTTC	1	132306293	132306321	GTGAGCCACTGTGCCTGGCCNNNNNNNN
chr12	chr12	13	GTGAGCCACTGCGCCTGGCCTCGGGTAT	1	125508327	125508355	GTGAGCCACTGTGCCTGGCCNNNNNNNN
chr12	chr12	13	ATGAGCCACTGTGCCCAGCCATGAGTAT	3	123088973	123089001	GTGAGCCACTGTGCCTGGCCNNNNNNNN
chr12	chr12	13	ATGAGCCACTGTGCCTGGCCCAGAATTC	1	110521004	110521032	GTGAGCCACTGTGCCTGGCCNNNNNNNN
chr1	chr1	13	GTGAGCCACCGTGCCCGGCCAGGGGTGC	2	203898666	203898694	GTGAGCCACTGTGCCTGGCCNNNNNNNN
chr1	chr1	13	GTAAGCCACTGTGCCCGGCCCTGGGTCG	2	203365711	203365739	GTGAGCCACTGTGCCTGGCCNNNNNNNN
chr1	chr1	13	ATGAGCCACTGCGCCTGGCCAGGAGTTG	2	201165752	201165780	GTGAGCCACTGTGCCTGGCCNNNNNNNN
chr11	chr11	13	GTGAGCCACTGTGCCTGGCCCAGAAATG	0	8812025	8812053	GTGAGCCACTGTGCCTGGCCNNNNNNNN
chr11	chr11	13	GTGAGCCACCGCGCCTGGCCTGGGGTCT	2	68227140	68227168	GTGAGCCACTGTGCCTGGCCNNNNNNNN
chr1	chr1	13	ATGAGCCACTGCGCCTGGCCAGGAATTA	2	15864922	15864950	GTGAGCCACTGTGCCTGGCCNNNNNNNN
chr11	chr11	13	GTGAGCCACCGTGCCTGGCCGGGGATGT	1	57104475	57104503	GTGAGCCACTGTGCCTGGCCNNNNNNNN
chr1	chr1	13	ATGAGCCACTGTGCCCAGCCAGGAATCT	3	15217304	15217332	GTGAGCCACTGTGCCTGGCCNNNNNNNN
chr11	chr11	13	GTGAGCCACTGTGCCCGGCCAGGAATGA	1	46871059	46871087	GTGAGCCACTGTGCCTGGCCNNNNNNNN
chr11	chr11	13	GTGAGCCACTGTGCCCGGCCTAGAATTT	1	46662899	46662927	GTGAGCCACTGTGCCTGGCCNNNNNNNN
chr1	chr1	13	GTGAGCCACTGTGCCTGGCCCAGAACAC	0	145651908	145651936	GTGAGCCACTGTGCCTGGCCNNNNNNNN
chr11	chr11	13	GTGAGCCACCATGCCTGGCCGAGAGTAA	2	33968337	33968365	GTGAGCCACTGTGCCTGGCCNNNNNNNN
chr1	chr1	13	GTGAGCCACTGCGCCTGGCCAAGGAACA	1	113513281	113513309	GTGAGCCACTGTGCCTGGCCNNNNNNNN
chr11	chr11	13	GTGAGCCACTGTGCCCAGCCCTGGATAT	2	126155434	126155462	GTGAGCCACTGTGCCTGGCCNNNNNNNN
chr10	chr10	13	GTGAGCCACTGTGCCTGGCCATGATTGT	0	945995	946023	GTGAGCCACTGTGCCTGGCCNNNNNNNN
chr10	chr10	13	ATGAGCCACTGTGCCTGGCCTGGGAATG	1	7666180	7666208	GTGAGCCACTGTGCCTGGCCNNNNNNNN
chr10	chr10	13	GTGAGCCACTGTGCCCAGCCTGGGATTA	2	72279610	72279638	GTGAGCCACTGTGCCTGGCCNNNNNNNN
chr10	chr10	13	GTGAGCCAATGTGCCCGGCCAGGGGTTA	2	16542530	16542558	GTGAGCCACTGTGCCTGGCCNNNNNNNN
chr10	chr10	13	GTGAGCCACTGTGCCTGGCCCAGAACAG	0	114107198	114107226	GTGAGCCACTGTGCCTGGCCNNNNNNNN
chrX	chrX	12	GTGAGCCACTGTGCCCAGCCCAGGGATG	2	95465895	95465923	GTGAGCCACTGTGCCTGGCCNNNNNNNN
chrX	chrX	12	ATGAGCCACCGTGCCTGGCCGTGAGTTC	2	77118373	77118401	GTGAGCCACTGTGCCTGGCCNNNNNNNN
chrX	chrX	12	ATGAGCCACTGTGCCTGGCCACAGGTTA	1	67617644	67617672	GTGAGCCACTGTGCCTGGCCNNNNNNNN
chrX	chrX	12	ATGAGCCACCATGCCTGGCCAAGAGTTA	3	45660951	45660979	GTGAGCCACTGTGCCTGGCCNNNNNNNN
chrX	chrX	12	GTGAGCCACTGTGCCTGGCCCAGAACAC	0	19033030	19033058	GTGAGCCACTGTGCCTGGCCNNNNNNNN
chrX	chrX	12	GTAAGCCACTGTGCCTGGCCTTGAGTAG	1	154434791	154434819	GTGAGCCACTGTGCCTGGCCNNNNNNNN
chrX	chrX	12	GTGAGCCACTGTGCCCAGCCTGGGGTAG	2	10173938	10173966	GTGAGCCACTGTGCCTGGCCNNNNNNNN
chrX	chrX	12	GTGAGCCACTGCGCCTGGCCAAGAACCA	1	100396612	100396640	GTGAGCCACTGTGCCTGGCCNNNNNNNN
chr9	chr9	12	GTGAGCCACTGTGCCTGGCCTTGGAAAG	0	96992034	96992062	GTGAGCCACTGTGCCTGGCCNNNNNNNN
chr9	chr9	12	GTGAGCCACCGTGCCTGGCCTAGAATAA	1	3338799	3338827	GTGAGCCACTGTGCCTGGCCNNNNNNNN
chr9	chr9	12	GTGAGCCACTGTGCCCAGCCCAGAATAT	2	27648136	27648164	GTGAGCCACTGTGCCTGGCCNNNNNNNN
chr9	chr9	12	GTGAGCCACCGTGCCTGGCCCCGAGGCC	1	135233929	135233957	GTGAGCCACTGTGCCTGGCCNNNNNNNN
chr9	chr9	12	GTGAGCCACTGTGCCCGGCCAAGAGCAA	1	130702042	130702070	GTGAGCCACTGTGCCTGGCCNNNNNNNN
chr9	chr9	12	GTGAGCCACTGTGCCTGGCCAGGAGGGT	0	130590005	130590033	GTGAGCCACTGTGCCTGGCCNNNNNNNN
chr9	chr9	12	GTGAGCCACTGTGCCTGACCATGAATCC	1	128759163	128759191	GTGAGCCACTGTGCCTGGCCNNNNNNNN
chr9	chr9	12	GTGAGCCACCGCGCCTGGCCCAGAGTCG	2	114342745	114342773	GTGAGCCACTGTGCCTGGCCNNNNNNNN
chr9	chr9	12	GTGAGCCACTGTGCCTGGCCTGGAAGTT	0	102982988	102983016	GTGAGCCACTGTGCCTGGCCNNNNNNNN
chr8	chr8	12	ATGAGCCACTGTGCCTGGCCAAGAAACA	1	42831750	42831778	GTGAGCCACTGTGCCTGGCCNNNNNNNN
chr8	chr8	12	GTGAGCCACTGCGCCTGGCCAGGAATAT	1	38639178	38639206	GTGAGCCACTGTGCCTGGCCNNNNNNNN
chr8	chr8	12	GTGAGCCACTGTGCCTGGCCAAGGGGCT	0	32760510	32760538	GTGAGCCACTGTGCCTGGCCNNNNNNNN
chr8	chr8	12	ATGAGCCACTGTGCCTGGCCTAGGGACT	1	144391147	144391175	GTGAGCCACTGTGCCTGGCCNNNNNNNN
chr8	chr8	12	ATGAGCCACTATGCCCAGCCATGAGTTT	4	141903136	141903164	GTGAGCCACTGTGCCTGGCCNNNNNNNN
chr7	chr7	12	GAGAGCCACTGTGCCTGGCCCAGAAGTT	1	92031827	92031855	GTGAGCCACTGTGCCTGGCCNNNNNNNN
chr7	chr7	12	GTGAGCCACTGTGCCTGGCCAAGAAAAT	0	80713868	80713896	GTGAGCCACTGTGCCTGGCCNNNNNNNN
chr7	chr7	12	GTGAACCACTGTGCCTGGCCAAGAGCTC	1	71140452	71140480	GTGAGCCACTGTGCCTGGCCNNNNNNNN
chr7	chr7	12	GTGTGCCACTGTGCCTGGCCTAGGGTAA	1	39774550	39774578	GTGAGCCACTGTGCCTGGCCNNNNNNNN
chr7	chr7	12	GTGAGCCACCGTGCCTGGCCTAGAATTA	1	23194991	23195019	GTGAGCCACTGTGCCTGGCCNNNNNNNN
chr7	chr7	12	GTGAGCCACCGTGCCCGGCCAAGGGTCT	2	139670185	139670213	GTGAGCCACTGTGCCTGGCCNNNNNNNN
chr7	chr7	12	GTGAGCCACTGCGCCCAGCCTAGAGTGT	3	138924581	138924609	GTGAGCCACTGTGCCTGGCCNNNNNNNN
chr7	chr7	12	GTGAGCCACTGCACCTGGCCGAGAGTTT	2	135861569	135861597	GTGAGCCACTGTGCCTGGCCNNNNNNNN
chr7	chr7	12	GTGAGCCACTATGCCTGGCCTGGGGGTA	1	13077519	13077547	GTGAGCCACTGTGCCTGGCCNNNNNNNN
chr7	chr7	12	GTGAGCCACTGCGCCTGGTCAGGAGTTC	2	101108742	101108770	GTGAGCCACTGTGCCTGGCCNNNNNNNN
chr6	chr6	12	ATGAGCCACTGTGCCCAGCCATGAATCT	3	95244252	95244280	GTGAGCCACTGTGCCTGGCCNNNNNNNN
chr6	chr6	12	GTGAGCCACTGCGCCTGGCCTGGGATCT	1	53235778	53235806	GTGAGCCACTGTGCCTGGCCNNNNNNNN
chr6	chr6	12	GTGAGCCACTGCGCCTGGCCAAGATACA	1	34335689	34335717	GTGAGCCACTGTGCCTGGCCNNNNNNNN
chr6	chr6	12	GTGAGCCACCATGCCTGGCCAAGAGTCT	2	24855972	24856000	GTGAGCCACTGTGCCTGGCCNNNNNNNN
chr6	chr6	12	ATGAGCCACTGTGCCTGGCCAGGGGCCA	1	21744072	21744100	GTGAGCCACTGTGCCTGGCCNNNNNNNN
chr6	chr6	12	TTGAGCCACTGTGCCCAGCCATGAGTAC	3	164570472	164570500	GTGAGCCACTGTGCCTGGCCNNNNNNNN
chr6	chr6	12	GTGAGCCACCATGCCTGGCCTCGGGTAT	2	149961962	149961990	GTGAGCCACTGTGCCTGGCCNNNNNNNN
chr6	chr6	12	GTGAGCCACCATGCCTGGCCAAGAGTAT	2	142802148	142802176	GTGAGCCACTGTGCCTGGCCNNNNNNNN
chr6	chr6	12	GTGAGCCACTGCGCCTGGCCTAGAATAT	1	10632702	10632730	GTGAGCCACTGTGCCTGGCCNNNNNNNN
chr5	chr5	12	GTGAGCCACTGCGCCCAGCCAGGAGTCT	3	66941698	66941726	GTGAGCCACTGTGCCTGGCCNNNNNNNN
chr5	chr5	12	ATGAGCCACTATGCCCAGCCCTGAGTCT	4	42160135	42160163	GTGAGCCACTGTGCCTGGCCNNNNNNNN
chr5	chr5	12	GTGAGCCACTGTGCCTGGCCCAGGGAAG	0	179906973	179907001	GTGAGCCACTGTGCCTGGCCNNNNNNNN
chr5	chr5	12	ATGAGCCACTGTGCCCAGCCTTGAGTTA	3	177595857	177595885	GTGAGCCACTGTGCCTGGCCNNNNNNNN
chr5	chr5	12	GTGAGCCACTGTGCCTGGCCAGGAGGTA	0	17310227	17310255	GTGAGCCACTGTGCCTGGCCNNNNNNNN
chr5	chr5	12	GTGAGCCACTGTGCCTGGCCTGCAGTTT	0	16692239	16692267	GTGAGCCACTGTGCCTGGCCNNNNNNNN
chr5	chr5	12	ATGAGCCACTGTGCCTGGCCAAGAGGAT	1	141107058	141107086	GTGAGCCACTGTGCCTGGCCNNNNNNNN
chr5	chr5	12	ATGAGCCACTGCGCCTGGCCCCGAGTGT	2	133317914	133317942	GTGAGCCACTGTGCCTGGCCNNNNNNNN
chr5	chr5	12	ATGAGCCACTGTGCCTGGCCACGAATAA	1	127565331	127565359	GTGAGCCACTGTGCCTGGCCNNNNNNNN
chr5	chr5	12	GTGAGCCACCGTGCCTGGCCAGGAAGCT	1	126116694	126116722	GTGAGCCACTGTGCCTGGCCNNNNNNNN
chr4	chr4	12	GTGAGCCACTGTGCCCGGCCTGGGGTCT	1	95507032	95507060	GTGAGCCACTGTGCCTGGCCNNNNNNNN
chr4	chr4	12	GTGAGCCACTGTGCCCGGCCGAGAACTC	1	89132848	89132876	GTGAGCCACTGTGCCTGGCCNNNNNNNN
chr4	chr4	12	GTGAGCCACTGTGCCTGGCCAAGACCCT	0	89031403	89031431	GTGAGCCACTGTGCCTGGCCNNNNNNNN
chr4	chr4	12	GTGAGCCACCGTGCCCAGCCAAGAATGT	3	82412524	82412552	GTGAGCCACTGTGCCTGGCCNNNNNNNN
chr4	chr4	12	ATGAGCCACTGTGCCCGGCCATGAGTTC	2	71757009	71757037	GTGAGCCACTGTGCCTGGCCNNNNNNNN
chr4	chr4	12	GTGAGCCACTGTGCCTGGCCTGGAACTA	0	56244218	56244246	GTGAGCCACTGTGCCTGGCCNNNNNNNN
chr4	chr4	12	GTGAGCCACTGTGCCTGGCCGGGATATT	0	46568424	46568452	GTGAGCCACTGTGCCTGGCCNNNNNNNN
chr4	chr4	12	GTGAGCCACTGTGCCTGGCCCAGAGTAT	0	1916332	1916360	GTGAGCCACTGTGCCTGGCCNNNNNNNN
chr4	chr4	12	GTGAGCCACTGTGCCTGGCCTTGGGACT	0	185512583	185512611	GTGAGCCACTGTGCCTGGCCNNNNNNNN
chr4	chr4	12	GTGAGCCACTGTGCCTGGCCAAGAAACC	0	162715040	162715068	GTGAGCCACTGTGCCTGGCCNNNNNNNN
chr3	chr3	12	GTGAGCCACTGTGCCAGGCCTGGGGTTG	1	95387576	95387604	GTGAGCCACTGTGCCTGGCCNNNNNNNN
chr3	chr3	12	GTGAGCCACCATGCCTGGCCAGGGGTAA	2	87445833	87445861	GTGAGCCACTGTGCCTGGCCNNNNNNNN
chr3	chr3	12	GTGAGCCACTGTGCCTGGCCTGGAATTT	0	75809474	75809502	GTGAGCCACTGTGCCTGGCCNNNNNNNN
chr3	chr3	12	GTGAGCCACCGTGCCCGGCCAGGAATTG	2	57503961	57503989	GTGAGCCACTGTGCCTGGCCNNNNNNNN
chr3	chr3	12	GTGAGCCACCGTGCCTGGCCAGGGAGAG	1	48714531	48714559	GTGAGCCACTGTGCCTGGCCNNNNNNNN
chr3	chr3	12	ATGAGCCACTGTGCCTGGCCCTGAAACT	1	47189900	47189928	GTGAGCCACTGTGCCTGGCCNNNNNNNN
chr3	chr3	12	GTGAGCCACTGTGCCTGGCCTTGAGATA	0	44447157	44447185	GTGAGCCACTGTGCCTGGCCNNNNNNNN
chr3	chr3	12	GTGAGCCACTGCGCCTGGCCGAGAGATG	1	24302703	24302731	GTGAGCCACTGTGCCTGGCCNNNNNNNN
chr3	chr3	12	GTGAACCACTGTGCCTGGCCTAGGATTG	1	17830975	17831003	GTGAGCCACTGTGCCTGGCCNNNNNNNN
chr3	chr3	12	ATGAGCCACTGTGCCCGGCCGAGAATTC	2	172490265	172490293	GTGAGCCACTGTGCCTGGCCNNNNNNNN
chr3	chr3	12	GTGAGCCACTGTGCCCGGCCTAGAGACA	1	169562431	169562459	GTGAGCCACTGTGCCTGGCCNNNNNNNN
chr3	chr3	12	GTGAGCCACAGTGCCTGGCCGTGAATTA	1	158958448	158958476	GTGAGCCACTGTGCCTGGCCNNNNNNNN
chr3	chr3	12	GTGAGCCACCGTGCCTGGCCAAGAGGAG	1	152696654	152696682	GTGAGCCACTGTGCCTGGCCNNNNNNNN
chr3	chr3	12	ATGAGCCACTGCGCCTGGCCAAGAATGC	2	125271671	125271699	GTGAGCCACTGTGCCTGGCCNNNNNNNN
chr2	chr2	12	GTGAGCCACTGTGCCCAGCCCTGAGATG	2	97474858	97474886	GTGAGCCACTGTGCCTGGCCNNNNNNNN
chr2	chr2	12	GTGAGTCACTGTGCCTGGCCATGGGATT	1	71399025	71399053	GTGAGCCACTGTGCCTGGCCNNNNNNNN
chr2	chr2	12	GTGAGCCACTGTGCCTAGCCAAGAATCA	1	46653086	46653114	GTGAGCCACTGTGCCTGGCCNNNNNNNN
chr2	chr2	12	GTGAGCCACCGTGCCTGGCCAAGAAAAC	1	37517656	37517684	GTGAGCCACTGTGCCTGGCCNNNNNNNN
chr22	chr22	12	GTGAGCCACCGTGCCTGGCCTAGGATTC	1	46548315	46548343	GTGAGCCACTGTGCCTGGCCNNNNNNNN
chr22	chr22	12	GTGAGCCACTGTGCCCGGCCTGGAATAC	1	40539779	40539807	GTGAGCCACTGTGCCTGGCCNNNNNNNN
chr22	chr22	12	GTGAGCCACTGCGCCTGGCCTTGAGTTA	1	38460344	38460372	GTGAGCCACTGTGCCTGGCCNNNNNNNN
chr22	chr22	12	GTGAGCCACTGCGCCTGGCCAGGAATCG	1	38095827	38095855	GTGAGCCACTGTGCCTGGCCNNNNNNNN
chr22	chr22	12	GTGAGCCACAGCGCCTGGCCTGGAGTGC	2	36182674	36182702	GTGAGCCACTGTGCCTGGCCNNNNNNNN
chr2	chr2	12	GTGAGCCACTGTGCCTGGCCTAGAATAC	0	231801826	231801854	GTGAGCCACTGTGCCTGGCCNNNNNNNN
chr22	chr22	12	GTGAACCACTGTGCCCAGCCAAGAGTTG	3	31622468	31622496	GTGAGCCACTGTGCCTGGCCNNNNNNNN
chr2	chr2	12	ATGAGCCACTGTGCCTGGCCAGGAGGTC	1	20556300	20556328	GTGAGCCACTGTGCCTGGCCNNNNNNNN
chr2	chr2	12	GTGAGCCACTGTGCCTGGCCTTGAACAC	0	190899876	190899904	GTGAGCCACTGTGCCTGGCCNNNNNNNN
chr2	chr2	12	GTGAGCCACTGTGCCTGGCCCAGAGGTG	0	160501495	160501523	GTGAGCCACTGTGCCTGGCCNNNNNNNN
chr2	chr2	12	GTGAGCCACTGTGCCCGGCCAGGAATGG	1	136911556	136911584	GTGAGCCACTGTGCCTGGCCNNNNNNNN
chr2	chr2	12	GTGAGCCATTGCGCCTGGCCTAGGATAA	2	126767427	126767455	GTGAGCCACTGTGCCTGGCCNNNNNNNN
chr2	chr2	12	GTGAGCCACTGTGCCCGGCCATGAAGCA	1	104008300	104008328	GTGAGCCACTGTGCCTGGCCNNNNNNNN
chr20	chr20	12	GTGAGCCACCGTGCCTGGCCAAGAAATC	1	55512160	55512188	GTGAGCCACTGTGCCTGGCCNNNNNNNN
chr20	chr20	12	GTGAGCCACTGTGCCCAGCCTGGAATGG	2	47077088	47077116	GTGAGCCACTGTGCCTGGCCNNNNNNNN
chr20	chr20	12	GTGAGCCACTGCGCCTGGCCTGGGGTGT	1	43809985	43810013	GTGAGCCACTGTGCCTGGCCNNNNNNNN
chr20	chr20	12	GTGAGCCACTGCGCCTGGCCAAGAATTA	1	33744874	33744902	GTGAGCCACTGTGCCTGGCCNNNNNNNN
chr20	chr20	12	GTGAGCCACTGTGCCCAGCCCTGAGTTC	2	31329703	31329731	GTGAGCCACTGTGCCTGGCCNNNNNNNN
chr20	chr20	12	GTGAGCCACTGTGCCTGGCCAAGAACTT	0	25340486	25340514	GTGAGCCACTGTGCCTGGCCNNNNNNNN
chr19	chr19	12	GTAAACCACTGTGCCTGGCCACGAGTAT	2	53531052	53531080	GTGAGCCACTGTGCCTGGCCNNNNNNNN
chr1	chr1	12	ATGAGCCACTGCGCCTGGCCATGGGTAC	2	92354721	92354749	GTGAGCCACTGTGCCTGGCCNNNNNNNN
chr1	chr1	12	GTGAGCCACTGCGCCCAGCCTAGAGTGT	3	92340329	92340357	GTGAGCCACTGTGCCTGGCCNNNNNNNN
chr19	chr19	12	GGGAGCCACTGTGCCTGGCCATGAATTT	1	13998997	13999025	GTGAGCCACTGTGCCTGGCCNNNNNNNN
chr18	chr18	12	ATGAGCCACTGTGCCTGGCCTAGAATTT	1	6350900	6350928	GTGAGCCACTGTGCCTGGCCNNNNNNNN
chr18	chr18	12	GTGAGCCACTGTGCCTGGCCTTGAGTTT	0	13814689	13814717	GTGAGCCACTGTGCCTGGCCNNNNNNNN
chr18	chr18	12	GTGAGCCACTGTGCCTGGCCTAGAGGGC	0	12687731	12687759	GTGAGCCACTGTGCCTGGCCNNNNNNNN
chr17	chr17	12	GTGAGCCACTGTACCTGGCCAAGGATGA	1	80544487	80544515	GTGAGCCACTGTGCCTGGCCNNNNNNNN
chr17	chr17	12	GAGAGCCACTGTGCCTGGCCACGGATTT	1	80495809	80495837	GTGAGCCACTGTGCCTGGCCNNNNNNNN
chr17	chr17	12	GTGAGCCACCGTGCCCAGCCAAGAATTT	3	66014932	66014960	GTGAGCCACTGTGCCTGGCCNNNNNNNN
chr17	chr17	12	GTGAGCCACTGTGCCCGGCCAAGGGGAG	1	50670290	50670318	GTGAGCCACTGTGCCTGGCCNNNNNNNN
chr17	chr17	12	GTGAGCCACTGCGCCTGGCCAGGAAATC	1	44997023	44997051	GTGAGCCACTGTGCCTGGCCNNNNNNNN
chr17	chr17	12	GTGAGCCACTGTGCCTAGCCTGGAGCCT	1	43478417	43478445	GTGAGCCACTGTGCCTGGCCNNNNNNNN
chr17	chr17	12	GTGAGCCACTGTGCCTGGCCTAGAATGG	0	43288532	43288560	GTGAGCCACTGTGCCTGGCCNNNNNNNN
chr17	chr17	12	ATGAGCCACTATGCCTGGCCTAGGGTGC	2	43028411	43028439	GTGAGCCACTGTGCCTGGCCNNNNNNNN
chr17	chr17	12	GTGAGCCACTGCGCCTGGCCAGGAGCAT	1	42593336	42593364	GTGAGCCACTGTGCCTGGCCNNNNNNNN
chr17	chr17	12	GTGAGCCACTGTGCCTGACCTAGAATGG	1	41046805	41046833	GTGAGCCACTGTGCCTGGCCNNNNNNNN
chr17	chr17	12	GTGAGCCACCGTGCCTGGCCCAGGATTC	1	27372706	27372734	GTGAGCCACTGTGCCTGGCCNNNNNNNN
chr17	chr17	12	ATGAGCCACTGTGCCCAGCCTGGAGTGC	3	1556123	1556151	GTGAGCCACTGTGCCTGGCCNNNNNNNN
chr16	chr16	12	GTGAGCCACTGTGCCCAGCCTTGGATTT	2	84199938	84199966	GTGAGCCACTGTGCCTGGCCNNNNNNNN
chr16	chr16	12	GTGAGCCACCGTGCCCAGCCAAGGGTGT	3	73306925	73306953	GTGAGCCACTGTGCCTGGCCNNNNNNNN
chr16	chr16	12	ATGAGCCACTGTGTCTGGCCAAGAGTTT	2	6735568	6735596	GTGAGCCACTGTGCCTGGCCNNNNNNNN
chr16	chr16	12	GTGAGCCACCGTGCCTGGCCAAGAGTGG	1	67155384	67155412	GTGAGCCACTGTGCCTGGCCNNNNNNNN
chr16	chr16	12	GTGAACCACTGTGCCCAGCCCAGAGTGA	3	57854462	57854490	GTGAGCCACTGTGCCTGGCCNNNNNNNN
chr16	chr16	12	GTGAGCCACTGTGCCTGGCCTTGAGTGA	0	25015454	25015482	GTGAGCCACTGTGCCTGGCCNNNNNNNN
chr1	chr1	12	GTGAGCCACTGCGCCTGGCCTGGAATGT	1	62163941	62163969	GTGAGCCACTGTGCCTGGCCNNNNNNNN
chr15	chr15	12	GTGAGCCACCATGCCCGGCCAAGAGTTC	3	88218238	88218266	GTGAGCCACTGTGCCTGGCCNNNNNNNN
chr15	chr15	12	GTGAGACACTGTGCCCAGCCAAGAGTTT	3	72272885	72272913	GTGAGCCACTGTGCCTGGCCNNNNNNNN
chr1	chr1	12	ATGAGCCACTATGCCTGGCCAAGAATAC	2	57223731	57223759	GTGAGCCACTGTGCCTGGCCNNNNNNNN
chr15	chr15	12	GTGAGCCACCGTGCCTGGCCAAGAGATT	1	70907260	70907288	GTGAGCCACTGTGCCTGGCCNNNNNNNN
chr15	chr15	12	GTGAGCCACCGTGCCTGGCCCCGAGTTT	1	60609519	60609547	GTGAGCCACTGTGCCTGGCCNNNNNNNN
chr15	chr15	12	GTGAGCCACTGTGCCTGGCCGTGGATAG	0	52324666	52324694	GTGAGCCACTGTGCCTGGCCNNNNNNNN
chr1	chr1	12	GTGAGCCACTGTGCCTGGCCAAGGGCCA	0	53177338	53177366	GTGAGCCACTGTGCCTGGCCNNNNNNNN
chr15	chr15	12	ATGAGCCACTGTGCCCAGCCTAGGATTC	3	101760238	101760266	GTGAGCCACTGTGCCTGGCCNNNNNNNN
chr1	chr1	12	ATGAGCCACTGTGCCTGGCCAAGGGATT	1	46844148	46844176	GTGAGCCACTGTGCCTGGCCNNNNNNNN
chr14	chr14	12	GTGAGCCATTGCGCCCGGCCAAGAGTTC	3	65178409	65178437	GTGAGCCACTGTGCCTGGCCNNNNNNNN
chr14	chr14	12	GTGAGCCACTGCGCCTGGCCAAGGATAG	1	56004895	56004923	GTGAGCCACTGTGCCTGGCCNNNNNNNN
chr14	chr14	12	GTGAGCCACTGCGCCTGGCCAGGGATTT	1	50738568	50738596	GTGAGCCACTGTGCCTGGCCNNNNNNNN
chr14	chr14	12	GTGAGCCACTGCGCCCAGCCAGGAGTCT	3	35363434	35363462	GTGAGCCACTGTGCCTGGCCNNNNNNNN
chr14	chr14	12	GTGAGCCACTATGCCTGGCCCAGGGTAA	1	20900551	20900579	GTGAGCCACTGTGCCTGGCCNNNNNNNN
chr13	chr13	12	GTGAGCCATCATGCCTGGCCATGAGTTA	3	65723329	65723357	GTGAGCCACTGTGCCTGGCCNNNNNNNN
chr13	chr13	12	GTGAGCCACTGTGCCCAGCCTAGAATTT	2	28625962	28625990	GTGAGCCACTGTGCCTGGCCNNNNNNNN
chr13	chr13	12	GTGAGCCACTGTGCCCAGCCCTGAATTC	2	21978597	21978625	GTGAGCCACTGTGCCTGGCCNNNNNNNN
chr13	chr13	12	GTGAGCCACTGTGCCTGGCCAGGAATCT	0	114043654	114043682	GTGAGCCACTGTGCCTGGCCNNNNNNNN
chr12	chr12	12	GTGAGCCACTGTGCCCGGCCTGGAATTG	1	99192178	99192206	GTGAGCCACTGTGCCTGGCCNNNNNNNN
chr12	chr12	12	GTGAGCCACTGTGCCCAGCCCCGGGTAA	2	96070162	96070190	GTGAGCCACTGTGCCTGGCCNNNNNNNN
chr12	chr12	12	GTGAGCCACTGTGCCTGGTCAGGAATTG	1	92932271	92932299	GTGAGCCACTGTGCCTGGCCNNNNNNNN
chr1	chr1	12	GTGAGCCACCGTGCCCGGCCCAGGGTTG	2	28791683	28791711	GTGAGCCACTGTGCCTGGCCNNNNNNNN
chr12	chr12	12	GTGAGCCACTGCGCCTGGCCTGGAGTTG	1	8489251	8489279	GTGAGCCACTGTGCCTGGCCNNNNNNNN
chr12	chr12	12	ATGAGCCACTGTGCCTGGCCTTGAATTA	1	54873853	54873881	GTGAGCCACTGTGCCTGGCCNNNNNNNN
chr12	chr12	12	GTGAGCCACTGTGCCCGGCCAAGAAGCA	1	53632393	53632421	GTGAGCCACTGTGCCTGGCCNNNNNNNN
chr12	chr12	12	GTGAGCCACCGTGCCTGGCCTGGAATGA	1	49292373	49292401	GTGAGCCACTGTGCCTGGCCNNNNNNNN
chr12	chr12	12	ATGAGCCACTGTGCCCAGCCCTGAATTC	3	3066120	3066148	GTGAGCCACTGTGCCTGGCCNNNNNNNN
chr12	chr12	12	GTGAGCCACTGTGCCTGGCCTTGAGAGA	0	27208493	27208521	GTGAGCCACTGTGCCTGGCCNNNNNNNN
chr12	chr12	12	GTGAGTCACTGTGCCCAGCCAGGAGTGC	3	117547521	117547549	GTGAGCCACTGTGCCTGGCCNNNNNNNN
chr12	chr12	12	GTGAGCCACTGTGCCTGGCCCCGAGCCT	0	113977633	113977661	GTGAGCCACTGTGCCTGGCCNNNNNNNN
chr12	chr12	12	GTGAGCCACCGTGCCTGGCCTGGAGTTT	1	108773014	108773042	GTGAGCCACTGTGCCTGGCCNNNNNNNN
chr12	chr12	12	GTGAGCCACAGTGCCTGGCCCAGAATCA	1	107369355	107369383	GTGAGCCACTGTGCCTGGCCNNNNNNNN
chr1	chr1	12	GTGAGCCACTGCGCCCAGCCAAGGGTGA	3	205740136	205740164	GTGAGCCACTGTGCCTGGCCNNNNNNNN
chr1	chr1	12	ATGAGCCACTGTGCCTGGCCTGGAAGAT	1	199902471	199902499	GTGAGCCACTGTGCCTGGCCNNNNNNNN
chr1	chr1	12	GTGAGCCACTGTGCCTGGCCCTGGGACA	0	18886840	18886868	GTGAGCCACTGTGCCTGGCCNNNNNNNN
chr11	chr11	12	GTGAGCCACTGTGCCTGGCCCAGAAATG	0	85880051	85880079	GTGAGCCACTGTGCCTGGCCNNNNNNNN
chr1	chr1	12	GTGAACCACTGTGCCCGGCCAGGGGTCT	2	176828630	176828658	GTGAGCCACTGTGCCTGGCCNNNNNNNN
chr11	chr11	12	GTGAGCCACTGTGCCTGGCCTTGAGCAT	0	66708268	66708296	GTGAGCCACTGTGCCTGGCCNNNNNNNN
chr1	chr1	12	GTGAGCCACCGTGCCTGGCCTAGAATCT	1	156353346	156353374	GTGAGCCACTGTGCCTGGCCNNNNNNNN
chr1	chr1	12	GTGAGCCACTGTGCCTGGCCTGGGTTTT	0	155284546	155284574	GTGAGCCACTGTGCCTGGCCNNNNNNNN
chr1	chr1	12	GTGAGCCACCGTGCCTGGCCAGGGGACT	1	15362053	15362081	GTGAGCCACTGTGCCTGGCCNNNNNNNN
chr1	chr1	12	GTGGGCCACTATGCCCAGCCAGGAGTCC	4	151003942	151003970	GTGAGCCACTGTGCCTGGCCNNNNNNNN
chr11	chr11	12	GTGAGCCACCGCGCCTGGCCATGAATTC	2	46742869	46742897	GTGAGCCACTGTGCCTGGCCNNNNNNNN
chr1	chr1	12	GTGAGCCACTGTGCCCAGCCAAGAATGT	2	14599063	14599091	GTGAGCCACTGTGCCTGGCCNNNNNNNN
chr1	chr1	12	GTGAGCCACTGCGCCTGGCCCCGAAGTC	1	113630250	113630278	GTGAGCCACTGTGCCTGGCCNNNNNNNN
chr10	chr10	12	GTGAGCCACCATGCCTGGCCCTGAGTTT	2	99999772	99999800	GTGAGCCACTGTGCCTGGCCNNNNNNNN
chr10	chr10	12	GTGAGCCACTGTGCCTGGCCGGGAAGCA	0	87829115	87829143	GTGAGCCACTGTGCCTGGCCNNNNNNNN
chr10	chr10	12	GTGAGCCACTGTGCCTGGCCTAGAGCAG	0	68480300	68480328	GTGAGCCACTGTGCCTGGCCNNNNNNNN
chr10	chr10	12	ATGAGCCACCGTGCCTGGCCAGGGGATG	2	6164736	6164764	GTGAGCCACTGTGCCTGGCCNNNNNNNN
chr10	chr10	12	GTGAGCCACTGTGCCCGGCCAAGAATAG	1	32223243	32223271	GTGAGCCACTGTGCCTGGCCNNNNNNNN
chr10	chr10	12	GTGAGTCACTGTGCCTGGCCTAGAATTT	1	115839122	115839150	GTGAGCCACTGTGCCTGGCCNNNNNNNN
chr10	chr10	12	GTGAGCCACCATGCCTGGCCAGGAGTAT	2	114306034	114306062	GTGAGCCACTGTGCCTGGCCNNNNNNNN
chrX	chrX	11	GTGAGCCACTGCGCCTGGCCAGGAAAAC	1	77111544	77111572	GTGAGCCACTGTGCCTGGCCNNNNNNNN
chrX	chrX	11	ATGAGCCACTGTGCCTGGCCAAGAAAAG	1	54115191	54115219	GTGAGCCACTGTGCCTGGCCNNNNNNNN
chrX	chrX	11	GTGAGCCACTGTGCCTGGCCCGGAAGTT	0	48723709	48723737	GTGAGCCACTGTGCCTGGCCNNNNNNNN
chrX	chrX	11	ATGAGCCACTGTGCCTGGCCGTGAATTG	1	18633816	18633844	GTGAGCCACTGTGCCTGGCCNNNNNNNN
chrX	chrX	11	GTGAGCCACTGCGCCCGGCCAAGAGTTG	2	15049911	15049939	GTGAGCCACTGTGCCTGGCCNNNNNNNN
chrX	chrX	11	GTGAGCCACTGCGCCTGGCCAGGAGCCT	1	140225964	140225992	GTGAGCCACTGTGCCTGGCCNNNNNNNN
chrX	chrX	11	GTGAGCCACTGTGCCCGGCCGAGAGACG	1	1398962	1398990	GTGAGCCACTGTGCCTGGCCNNNNNNNN
chrX	chrX	11	GTGAGCCACTACACCTGGCCAGGAGTTA	3	122564545	122564573	GTGAGCCACTGTGCCTGGCCNNNNNNNN
chrX	chrX	11	GTGAGCCACCGTGCCTGGCCCAGAATAT	1	101097652	101097680	GTGAGCCACTGTGCCTGGCCNNNNNNNN
chr9	chr9	11	GTGAGCCACTGCGCCTGGCCAAGAATAC	1	36709540	36709568	GTGAGCCACTGTGCCTGGCCNNNNNNNN
chr9	chr9	11	GTGAGCCACTATGCCTGGCCAAGAGACC	1	134186919	134186947	GTGAGCCACTGTGCCTGGCCNNNNNNNN
chr9	chr9	11	GTGAGCCACTGTGCCTGGCCAAGAGCCC	0	129773736	129773764	GTGAGCCACTGTGCCTGGCCNNNNNNNN
chr8	chr8	11	ATGAGCCACTGTGCCTGGCCTGGAGATA	1	20584877	20584905	GTGAGCCACTGTGCCTGGCCNNNNNNNN
chr8	chr8	11	GTGAGCCACTGTGCTTGGCCAAGAGTCC	1	135024160	135024188	GTGAGCCACTGTGCCTGGCCNNNNNNNN
chr8	chr8	11	GTGAGCCACTGTGCCTGGCCTGGAAGTT	0	125068996	125069024	GTGAGCCACTGTGCCTGGCCNNNNNNNN
chr8	chr8	11	GTGAGCCACTGTGCCCAGCCTAGAGGTA	2	110949324	110949352	GTGAGCCACTGTGCCTGGCCNNNNNNNN
chr7	chr7	11	ATGAGCCACTGTGCCCAGCCATGAATTT	3	95928024	95928052	GTGAGCCACTGTGCCTGGCCNNNNNNNN
chr7	chr7	11	GTGAGCCACTGTGCCTGGCCAGGATTAG	0	50429285	50429313	GTGAGCCACTGTGCCTGGCCNNNNNNNN
chr7	chr7	11	GTGAGCCACTGCACCTGGCCAGGAGTGA	2	44192639	44192667	GTGAGCCACTGTGCCTGGCCNNNNNNNN
chr7	chr7	11	GTGAGCCACTGTGCCTGGTCAGGAACCA	1	151332316	151332344	GTGAGCCACTGTGCCTGGCCNNNNNNNN
chr7	chr7	11	GTGAGCCACCGCGCCTGGCCTGGGGTTT	2	144799525	144799553	GTGAGCCACTGTGCCTGGCCNNNNNNNN
chr7	chr7	11	GTGAGCCACGGTGCCTGGCCAAGAGTAA	1	143070185	143070213	GTGAGCCACTGTGCCTGGCCNNNNNNNN
chr7	chr7	11	ATGAGCCACTGTGCCCAGCCAAGAGATC	3	128782696	128782724	GTGAGCCACTGTGCCTGGCCNNNNNNNN
chr7	chr7	11	GTGAGCCACTGTGCCTGGCTAAGAGTGA	1	121432442	121432470	GTGAGCCACTGTGCCTGGCCNNNNNNNN
chr7	chr7	11	ATGAGCCACTGTGCCTGGCCCAGAGCAG	1	107096523	107096551	GTGAGCCACTGTGCCTGGCCNNNNNNNN
chr7	chr7	11	GTGAGCCACTGTGCCCAGCCTGGGGAAG	2	101189836	101189864	GTGAGCCACTGTGCCTGGCCNNNNNNNN
chr7	chr7	11	GTGAGCCACTGCGCCTGGCCTTGGGTTG	1	100954551	100954579	GTGAGCCACTGTGCCTGGCCNNNNNNNN
chr6	chr6	11	ATGAGCCACTGTGCCTGGCCGAGGAGCC	1	56378441	56378469	GTGAGCCACTGTGCCTGGCCNNNNNNNN
chr6	chr6	11	GTGAGCCACCATGCCCGGCCATGGGTTT	3	54725849	54725877	GTGAGCCACTGTGCCTGGCCNNNNNNNN
chr6	chr6	11	GTGAGCCACTGTGCCCGGCCTAGGATGT	1	38388343	38388371	GTGAGCCACTGTGCCTGGCCNNNNNNNN
chr6	chr6	11	GTGAGCCACCGTGCCCAGCCTAGAGTGA	3	36838679	36838707	GTGAGCCACTGTGCCTGGCCNNNNNNNN
chr6	chr6	11	GTGAGCCACTGTGCCTGGCCAAGATTTC	0	159222011	159222039	GTGAGCCACTGTGCCTGGCCNNNNNNNN
chr6	chr6	11	ATGAGCCACTGTGCCTGGCCGAGAAATT	1	157404977	157405005	GTGAGCCACTGTGCCTGGCCNNNNNNNN
chr6	chr6	11	GTGAGCCACTGTGCCTGGTCAAGGGACA	1	154944938	154944966	GTGAGCCACTGTGCCTGGCCNNNNNNNN
chr6	chr6	11	ATGAGCCACTGTGCCTGGCCAGGAAATT	1	153279811	153279839	GTGAGCCACTGTGCCTGGCCNNNNNNNN
chr6	chr6	11	GTGAGCCACCGTGCCTGGCCTGGAGTAG	1	151904407	151904435	GTGAGCCACTGTGCCTGGCCNNNNNNNN
chr6	chr6	11	GTGAGCCACCGCGCCTGGCCGGGAGTTT	2	107321661	107321689	GTGAGCCACTGTGCCTGGCCNNNNNNNN
chr5	chr5	11	ATGAGCCACTGTGCCTGGCCCTGAATTA	1	95629743	95629771	GTGAGCCACTGTGCCTGGCCNNNNNNNN
chr5	chr5	11	GTGAGCCACAGTGCCTGGCCTAGGATCC	1	68544494	68544522	GTGAGCCACTGTGCCTGGCCNNNNNNNN
chr5	chr5	11	GTGAGCCACTGTGCCCAGCCTGGAATAA	2	179310138	179310166	GTGAGCCACTGTGCCTGGCCNNNNNNNN
chr5	chr5	11	GTGAGCCACTGTGCCTGGCCGAAAGTTG	0	174451746	174451774	GTGAGCCACTGTGCCTGGCCNNNNNNNN
chr5	chr5	11	GTGAGCCACTGTGCCTGGCCAAGGTTTT	0	174325470	174325498	GTGAGCCACTGTGCCTGGCCNNNNNNNN
chr5	chr5	11	ATGAGCCACTGTGCCCAGCCGAGAGTTT	3	164220439	164220467	GTGAGCCACTGTGCCTGGCCNNNNNNNN
chr5	chr5	11	ATGAGCCACCGTGCCTGGCCTGGAATCA	2	149820439	149820467	GTGAGCCACTGTGCCTGGCCNNNNNNNN
chr5	chr5	11	GTGAGCCACCGTGCCTGGCCATGAATAA	1	137260980	137261008	GTGAGCCACTGTGCCTGGCCNNNNNNNN
chr4	chr4	11	GTGAGCCACTGTGCCTGGCCTTGAAATG	0	85595049	85595077	GTGAGCCACTGTGCCTGGCCNNNNNNNN
chr4	chr4	11	TTGAGCCACTGCGCCTGGCCTGGAATCA	2	75247731	75247759	GTGAGCCACTGTGCCTGGCCNNNNNNNN
chr4	chr4	11	GTGAGCCACTGTGCCTGGCCATGAAAAT	0	186766453	186766481	GTGAGCCACTGTGCCTGGCCNNNNNNNN
chr4	chr4	11	ATGAGCCACTGTACCTGGCCTAGAGTCT	2	184698913	184698941	GTGAGCCACTGTGCCTGGCCNNNNNNNN
chr4	chr4	11	GTGAGCCACCGCGCCCGGCCATGAGTTC	3	183742021	183742049	GTGAGCCACTGTGCCTGGCCNNNNNNNN
chr4	chr4	11	ATAAGCCACTGTGCCTGGCCTGGAATTT	2	174270573	174270601	GTGAGCCACTGTGCCTGGCCNNNNNNNN
chr4	chr4	11	GTGAGCCACTGCGCCTGGCCAAGAATGG	1	148556152	148556180	GTGAGCCACTGTGCCTGGCCNNNNNNNN
chr4	chr4	11	GTGAGCCACTATGCCCAGCCGAGGATCA	3	127671049	127671077	GTGAGCCACTGTGCCTGGCCNNNNNNNN
chr4	chr4	11	GTGAGCCACTGTGCCCGGCCAAGAGTTC	1	115502713	115502741	GTGAGCCACTGTGCCTGGCCNNNNNNNN
chr4	chr4	11	GTGAGCCACCGCGCCTGGCCAAGAGTTT	2	102654397	102654425	GTGAGCCACTGTGCCTGGCCNNNNNNNN
chr3	chr3	11	GTGAGCCACTGTGCCCGGCCTAGAATAT	1	81321706	81321734	GTGAGCCACTGTGCCTGGCCNNNNNNNN
chr3	chr3	11	ATGAGCCACCGTGCCTGGCCTTGGGTTT	2	57648555	57648583	GTGAGCCACTGTGCCTGGCCNNNNNNNN
chr3	chr3	11	GTGAGCCACTGTGCCTGGCCAAGATATT	0	54437097	54437125	GTGAGCCACTGTGCCTGGCCNNNNNNNN
chr3	chr3	11	GTGAGCCACTGTGCCTGGCCTGAAGTTG	0	54208831	54208859	GTGAGCCACTGTGCCTGGCCNNNNNNNN
chr3	chr3	11	GTGAGCCACTGCGCCCAGCCTAGGATAC	3	49992985	49993013	GTGAGCCACTGTGCCTGGCCNNNNNNNN
chr3	chr3	11	GTGAGCCACTGTGCCTGGCCCTGATTGG	0	48100715	48100743	GTGAGCCACTGTGCCTGGCCNNNNNNNN
chr3	chr3	11	GTGAGCCACTGCGCCCGGCCTGGAGTAA	2	21913207	21913235	GTGAGCCACTGTGCCTGGCCNNNNNNNN
chr3	chr3	11	GTGAGCCACTGTGCCCAGCCCTGAGTTT	2	180656615	180656643	GTGAGCCACTGTGCCTGGCCNNNNNNNN
chr3	chr3	11	GTGAGCCACCATGCCTGGCCAAGAGTTA	2	180210545	180210573	GTGAGCCACTGTGCCTGGCCNNNNNNNN
chr3	chr3	11	GTGAGCCACCATGCCTGGCCAAGGGTAT	2	171152004	171152032	GTGAGCCACTGTGCCTGGCCNNNNNNNN
chr3	chr3	11	ATGAGCCACTGTGCCCAGCCATGGGTTT	3	152015422	152015450	GTGAGCCACTGTGCCTGGCCNNNNNNNN
chr2	chr2	11	GTGAGCCACTGCGCCTGGCCCCGAGTTC	1	70301958	70301986	GTGAGCCACTGTGCCTGGCCNNNNNNNN
chr2	chr2	11	GTGAGCCACCGTGCCCAGCCATGAGTAC	3	62089017	62089045	GTGAGCCACTGTGCCTGGCCNNNNNNNN
chr2	chr2	11	GTGAGCCACTGTGCCTGGCCAGAAGTGA	0	39335739	39335767	GTGAGCCACTGTGCCTGGCCNNNNNNNN
chr2	chr2	11	GTGAGCCACTGTGCCGGGCCAAGAGTCC	1	33599731	33599759	GTGAGCCACTGTGCCTGGCCNNNNNNNN
chr2	chr2	11	ATGAGCCACTGCGCCTGGCCAGGAGTTT	2	24695230	24695258	GTGAGCCACTGTGCCTGGCCNNNNNNNN
chr2	chr2	11	GTGAGCCATCGTGCCTGGCCTTGGGTTT	2	24620694	24620722	GTGAGCCACTGTGCCTGGCCNNNNNNNN
chr22	chr22	11	GTGAGCCATTGTGCCCGGCCAGGAATCT	2	41947834	41947862	GTGAGCCACTGTGCCTGGCCNNNNNNNN
chr22	chr22	11	GTGAGCCACTGTGCCTGGCCTGGAGCTC	0	41401597	41401625	GTGAGCCACTGTGCCTGGCCNNNNNNNN
chr22	chr22	11	GTGAGCCACTGTGCCTGGCCTGGATTTA	0	40457506	40457534	GTGAGCCACTGTGCCTGGCCNNNNNNNN
chr2	chr2	11	GTGAGCCACTGTACCTGGCCTAGAGTGA	1	238410179	238410207	GTGAGCCACTGTGCCTGGCCNNNNNNNN
chr22	chr22	11	GTGAGCCACTGTGCCTGGCCAAGATTTC	0	36812563	36812591	GTGAGCCACTGTGCCTGGCCNNNNNNNN
chr2	chr2	11	ATGAGCCACTGTGCCCAGCCAAGAATTG	3	219478568	219478596	GTGAGCCACTGTGCCTGGCCNNNNNNNN
chr22	chr22	11	GTGAGCCACCACGCCTGGCCAAGGGTGA	3	19087193	19087221	GTGAGCCACTGTGCCTGGCCNNNNNNNN
chr2	chr2	11	GTAAGCCACTGTGCCCGGCCTAGAGTTT	2	215250277	215250305	GTGAGCCACTGTGCCTGGCCNNNNNNNN
chr2	chr2	11	GTGAGCCACTGTGCCTGGACCAGAATTA	1	208801999	208802027	GTGAGCCACTGTGCCTGGCCNNNNNNNN
chr2	chr2	11	GTGAGCCACTGTGCCCGGCCTAGAATTT	1	177140246	177140274	GTGAGCCACTGTGCCTGGCCNNNNNNNN
chr2	chr2	11	GTGAGCCATTGCGCCTGGCCTGGGGTCC	2	136982827	136982855	GTGAGCCACTGTGCCTGGCCNNNNNNNN
chr21	chr21	11	GTGAGCCACTGGGCCTGGCCCAGGGTGT	1	30604145	30604173	GTGAGCCACTGTGCCTGGCCNNNNNNNN
chr20	chr20	11	GTGAGCCACTGTGCCCAGCCTAGAGCAG	2	5686081	5686109	GTGAGCCACTGTGCCTGGCCNNNNNNNN
chr20	chr20	11	ATGAGCCACTGTGCCTGGCCCAGAAGAA	1	4800860	4800888	GTGAGCCACTGTGCCTGGCCNNNNNNNN
chr20	chr20	11	ATGAGCCACTGTGCCTGGCCCAGGATGA	1	44444984	44445012	GTGAGCCACTGTGCCTGGCCNNNNNNNN
chr20	chr20	11	GTGAGCCACTGTGCCCGGCCAAGAATTC	1	17310948	17310976	GTGAGCCACTGTGCCTGGCCNNNNNNNN
chr19	chr19	11	GTGAGCCACTGTGCCTGGCCCCGCTTCT	0	5476421	5476449	GTGAGCCACTGTGCCTGGCCNNNNNNNN
chr19	chr19	11	GTGAGCCACTGCGCCTGGCCTAGGAGCC	1	48172086	48172114	GTGAGCCACTGTGCCTGGCCNNNNNNNN
chr19	chr19	11	ATGAGCCACTGTGCCCAGCCAAGAGTGA	3	48090333	48090361	GTGAGCCACTGTGCCTGGCCNNNNNNNN
chr19	chr19	11	ATGAGCCACTGTGTCTGGCCCTGAGTTA	2	39388445	39388473	GTGAGCCACTGTGCCTGGCCNNNNNNNN
chr19	chr19	11	GTGAGCCACTGCGCCTGGCCCGGAGCTG	1	15058592	15058620	GTGAGCCACTGTGCCTGGCCNNNNNNNN
chr19	chr19	11	GTGAGCCACTGTGCCTGGCCCAGACCCT	0	14534947	14534975	GTGAGCCACTGTGCCTGGCCNNNNNNNN
chr1	chr1	11	GTGAGCCACTGTGCCTGGCCCTGCACCT	0	8951411	8951439	GTGAGCCACTGTGCCTGGCCNNNNNNNN
chr18	chr18	11	GTGAGCCACTGCGCCTGGCCATGAATTC	1	69103084	69103112	GTGAGCCACTGTGCCTGGCCNNNNNNNN
chr18	chr18	11	GTGAGCCACTGTGCCTGGCCGAGAAATG	0	26613868	26613896	GTGAGCCACTGTGCCTGGCCNNNNNNNN
chr1	chr1	11	GTGAGCCACTGCGCCCGGCCAGGGATGC	2	77935899	77935927	GTGAGCCACTGTGCCTGGCCNNNNNNNN
chr17	chr17	11	GTGAGCCACCGCGCCTGGCCACGAGTTC	2	62341487	62341515	GTGAGCCACTGTGCCTGGCCNNNNNNNN
chr17	chr17	11	GTGAGCTACTGTGCCTGGCCATGAGTTT	1	46907460	46907488	GTGAGCCACTGTGCCTGGCCNNNNNNNN
chr17	chr17	11	ATGAGCCACTATGCCTGGCCAAGAATTG	2	3653021	3653049	GTGAGCCACTGTGCCTGGCCNNNNNNNN
chr17	chr17	11	ATGAGCCACTGCGCCTGGCCATGAATTC	2	30749015	30749043	GTGAGCCACTGTGCCTGGCCNNNNNNNN
chr17	chr17	11	ATGAGCCACTGTGCCTGGCCAGAAGTCT	1	29401855	29401883	GTGAGCCACTGTGCCTGGCCNNNNNNNN
chr17	chr17	11	GTGAGCCACCATGCCTGGCCATGGATCA	2	20050664	20050692	GTGAGCCACTGTGCCTGGCCNNNNNNNN
chr16	chr16	11	GTGAGCCACGGTGCCTGGCCAAGGGTTT	1	71931987	71932015	GTGAGCCACTGTGCCTGGCCNNNNNNNN
chr16	chr16	11	ATGAGCCACTGTGCCCAGCCTAGAGTTG	3	54585059	54585087	GTGAGCCACTGTGCCTGGCCNNNNNNNN
chr16	chr16	11	GTGAGCCACTGTGCCCGGCCTTGAGTTT	1	30469990	30470018	GTGAGCCACTGTGCCTGGCCNNNNNNNN
chr1	chr1	11	GTGAGCCACTGTGCCCAGCCTAGAATGC	2	62989249	62989277	GTGAGCCACTGTGCCTGGCCNNNNNNNN
chr16	chr16	11	GTGAGCCACCGTGCCCGGCCGTGAATGT	2	2587487	2587515	GTGAGCCACTGTGCCTGGCCNNNNNNNN
chr16	chr16	11	GTGAGCCACTGCGCCTGGCCTGGAATTA	1	13841107	13841135	GTGAGCCACTGTGCCTGGCCNNNNNNNN
chr16	chr16	11	GTGAGCCACTGTGCCTGGCCAGGAACAA	0	13508769	13508797	GTGAGCCACTGTGCCTGGCCNNNNNNNN
chr15	chr15	11	GTGAGCCACTGTGCCTGGCCATGGTTCT	0	75770891	75770919	GTGAGCCACTGTGCCTGGCCNNNNNNNN
chr15	chr15	11	GTGAGCCACCGTGCCTGGCCCAGGATCT	1	68353299	68353327	GTGAGCCACTGTGCCTGGCCNNNNNNNN
chr15	chr15	11	GTGAGCCACTGTGCCTGGCCAAGAAAGG	0	20437098	20437126	GTGAGCCACTGTGCCTGGCCNNNNNNNN
chr14	chr14	11	GTGAGCCACTGTGCCTGGCCAAGGAGCT	0	71684988	71685016	GTGAGCCACTGTGCCTGGCCNNNNNNNN
chr14	chr14	11	GTGAGCCACCGCGCCTGGCCGAGGGTTC	2	69625247	69625275	GTGAGCCACTGTGCCTGGCCNNNNNNNN
chr1	chr1	11	GTGAGCCACTGTGCCGGGCCGAGAGTTT	1	44103754	44103782	GTGAGCCACTGTGCCTGGCCNNNNNNNN
chr14	chr14	11	GTGAGCCACTGTGCCTGGCCTGGAAAAC	0	36552256	36552284	GTGAGCCACTGTGCCTGGCCNNNNNNNN
chr14	chr14	11	GTGAGCCACTATGCCTGGCCTAGGGTTT	1	31396841	31396869	GTGAGCCACTGTGCCTGGCCNNNNNNNN
chr13	chr13	11	ATGAGCCACTGCGCCTGGCCTAGAATAG	2	80783707	80783735	GTGAGCCACTGTGCCTGGCCNNNNNNNN
chr13	chr13	11	GTGAGCCACTGTGCCCAGCCCCGAGTGG	2	49559097	49559125	GTGAGCCACTGTGCCTGGCCNNNNNNNN
chr13	chr13	11	ATGAGCCACTGCGCCCAGCCAGGAGTCA	4	111206172	111206200	GTGAGCCACTGTGCCTGGCCNNNNNNNN
chr12	chr12	11	GTGAGCCACTGTGCCTGGCCTTGTTACA	0	94998291	94998319	GTGAGCCACTGTGCCTGGCCNNNNNNNN
chr12	chr12	11	GTGAGCCACTGTGCCTGGCCAAGATTAG	0	93718694	93718722	GTGAGCCACTGTGCCTGGCCNNNNNNNN
chr12	chr12	11	GTGAGCCACCATGCCTGGCCAGGAGTTT	2	92980844	92980872	GTGAGCCACTGTGCCTGGCCNNNNNNNN
chr12	chr12	11	ATGAGCCACTGTGCCCGGCCTTGAGTAG	2	89833661	89833689	GTGAGCCACTGTGCCTGGCCNNNNNNNN
chr1	chr1	11	ATGAGCCACTGTGCCTGGCCTTGAAATT	1	27195300	27195328	GTGAGCCACTGTGCCTGGCCNNNNNNNN
chr12	chr12	11	GTGAGCCACCGCGCCTGGCCTTGAGTTA	2	69002751	69002779	GTGAGCCACTGTGCCTGGCCNNNNNNNN
chr12	chr12	11	GTGAGCCACTGCGCCTGGCCCGGAATTC	1	50578892	50578920	GTGAGCCACTGTGCCTGGCCNNNNNNNN
chr1	chr1	11	GTGAGCCACTGTGCCTGGTCTAGAATAT	1	25011161	25011189	GTGAGCCACTGTGCCTGGCCNNNNNNNN
chr1	chr1	11	ATGAGCCACCGTGCCTGGCCAAGAGTCT	2	24799774	24799802	GTGAGCCACTGTGCCTGGCCNNNNNNNN
chr1	chr1	11	GTGAGCCACTGTGCCCAGCCCAGGATTT	2	235439161	235439189	GTGAGCCACTGTGCCTGGCCNNNNNNNN
chr1	chr1	11	GTGAGCCACTGTGCCCGGCCTGGGGCTG	1	228355337	228355365	GTGAGCCACTGTGCCTGGCCNNNNNNNN
chr1	chr1	11	ATGAGCCACTGTGCCCAGCCTTGGATCA	3	225978709	225978737	GTGAGCCACTGTGCCTGGCCNNNNNNNN
chr1	chr1	11	GTGAGCCACTGTGCCTGGCCACGGTTGC	0	22366130	22366158	GTGAGCCACTGTGCCTGGCCNNNNNNNN
chr12	chr12	11	ATGAGCCACCGTGCCTGGCCAGGAATGG	2	14451118	14451146	GTGAGCCACTGTGCCTGGCCNNNNNNNN
chr12	chr12	11	ATGAGCCACTGTGCCCAGCCGTGAATGT	3	12387476	12387504	GTGAGCCACTGTGCCTGGCCNNNNNNNN
chr12	chr12	11	ATGAGCCACTGTGCCCAGCCCCGAGTTT	3	122203315	122203343	GTGAGCCACTGTGCCTGGCCNNNNNNNN
chr12	chr12	11	ATGAGCCACTGTGCCCAGCCCAGAATTT	3	116814952	116814980	GTGAGCCACTGTGCCTGGCCNNNNNNNN
chr11	chr11	11	ATGAGCCACTGTGCCCAGCCTAGAGTCT	3	9319715	9319743	GTGAGCCACTGTGCCTGGCCNNNNNNNN
chr11	chr11	11	GTGAGCCACTATGCCCAGCCTAGGATTC	3	86424634	86424662	GTGAGCCACTGTGCCTGGCCNNNNNNNN
chr11	chr11	11	ATGAGCCACTGTGCCTGGCTAGGAGTTT	2	86061187	86061215	GTGAGCCACTGTGCCTGGCCNNNNNNNN
chr1	chr1	11	ATGAGCCACCATGCCTGGCCAGGAGTTT	3	182421867	182421895	GTGAGCCACTGTGCCTGGCCNNNNNNNN
chr1	chr1	11	GTGAGCCACCGTGCCTGGCCAGGAGCTC	1	180550609	180550637	GTGAGCCACTGTGCCTGGCCNNNNNNNN
chr1	chr1	11	GTGAGCCACCGTGCCTGGCCTAGAGCAT	1	168029703	168029731	GTGAGCCACTGTGCCTGGCCNNNNNNNN
chr11	chr11	11	GTGAGCCACCGCGCCTGGCCCTGAGTTT	2	66579926	66579954	GTGAGCCACTGTGCCTGGCCNNNNNNNN
chr1	chr1	11	GTGAGCCACTGTGCCTGGCCAAAAGTCA	0	163512639	163512667	GTGAGCCACTGTGCCTGGCCNNNNNNNN
chr1	chr1	11	GTGAGCCACTGCGCCTGGCCAAGGATAA	1	153511613	153511641	GTGAGCCACTGTGCCTGGCCNNNNNNNN
chr11	chr11	11	GTGAGCCACCGTGCCTGGCCATGAGTAG	1	48048279	48048307	GTGAGCCACTGTGCCTGGCCNNNNNNNN
chr11	chr11	11	GTGAGCCACTGCGCCTGGCCAAGAGATT	1	20694687	20694715	GTGAGCCACTGTGCCTGGCCNNNNNNNN
chr11	chr11	11	GTGAGCCACCGTGCCCAGCCGGGAATCA	3	13763506	13763534	GTGAGCCACTGTGCCTGGCCNNNNNNNN
chr11	chr11	11	GTGAGCCACTGTGCCTGGCCAGGAACAT	0	125380811	125380839	GTGAGCCACTGTGCCTGGCCNNNNNNNN
chr1	chr1	11	GTGAGCCACCATGCCTGGCCTAGGATTT	2	100090718	100090746	GTGAGCCACTGTGCCTGGCCNNNNNNNN
chr10	chr10	11	GTGAGCCACCGTGCCCAGCCTGGGGTCT	3	99536572	99536600	GTGAGCCACTGTGCCTGGCCNNNNNNNN
chr10	chr10	11	GTGAGCCACTGTGCCCGGCCCAGAATGG	1	94043763	94043791	GTGAGCCACTGTGCCTGGCCNNNNNNNN
chr10	chr10	11	GTGAGCCACTGTGCCTGGCCACAGGTTT	0	93699474	93699502	GTGAGCCACTGTGCCTGGCCNNNNNNNN
chr10	chr10	11	GTGAGCCACTGTGCCTGGCCTAGAATAA	0	88508889	88508917	GTGAGCCACTGTGCCTGGCCNNNNNNNN
chr10	chr10	11	GTGAGCCACTGTGCCAGGCCTGGAGATT	1	71459930	71459958	GTGAGCCACTGTGCCTGGCCNNNNNNNN
chr10	chr10	11	ATGAGCCACTGTGCCCAGCCTAGAGTCA	3	64452479	64452507	GTGAGCCACTGTGCCTGGCCNNNNNNNN
chr10	chr10	11	GTGAGCCACCATGCCTGGCCAAGAGTAG	2	6001247	6001275	GTGAGCCACTGTGCCTGGCCNNNNNNNN
chr10	chr10	11	GTGAGCCACTGCGCCTGGCCTAGAGCTC	1	23118924	23118952	GTGAGCCACTGTGCCTGGCCNNNNNNNN
chr10	chr10	11	GTGAGCCACCATGCCTGGCCAAGAATTA	2	12372272	12372300	GTGAGCCACTGTGCCTGGCCNNNNNNNN
chr10	chr10	11	GTGAGCCACCATGCCTGGCCAAGGGTAG	2	112960346	112960374	GTGAGCCACTGTGCCTGGCCNNNNNNNN
chrX	chrX	10	GTGAGCCACTGCGCCTGGCCGAGAAATA	1	74436867	74436895	GTGAGCCACTGTGCCTGGCCNNNNNNNN
chrX	chrX	10	ATGAGCCACTGTGCCTGGCCAAGAACAT	1	69082553	69082581	GTGAGCCACTGTGCCTGGCCNNNNNNNN
chrX	chrX	10	GTGAGCCACTGTGCCCAGCCAGGAATAA	2	46682475	46682503	GTGAGCCACTGTGCCTGGCCNNNNNNNN
chrX	chrX	10	GTGAGCCACTGTGCCTGGCCTGGGATTT	0	14204328	14204356	GTGAGCCACTGTGCCTGGCCNNNNNNNN
chrX	chrX	10	GTGAGCCACTGTGCCCAGCCAGGAATGC	2	134736196	134736224	GTGAGCCACTGTGCCTGGCCNNNNNNNN
chrX	chrX	10	GTGAGCCACTGTGCCTGGCCTTGAATTT	0	11899041	11899069	GTGAGCCACTGTGCCTGGCCNNNNNNNN
chr9	chr9	10	GTGAGCCACTGTGCCTGGCCCAGAAGTC	0	97739228	97739256	GTGAGCCACTGTGCCTGGCCNNNNNNNN
chr9	chr9	10	ATGAGCCACTGTGCCCAGCCTAGAATTT	3	81367672	81367700	GTGAGCCACTGTGCCTGGCCNNNNNNNN
chr9	chr9	10	GTGAGCCACTGTGCCTGGCCTAGAATTT	0	77606897	77606925	GTGAGCCACTGTGCCTGGCCNNNNNNNN
chr9	chr9	10	GTGAGCCACTGTGCCTGGCCCTGGGGGG	0	73122958	73122986	GTGAGCCACTGTGCCTGGCCNNNNNNNN
chr9	chr9	10	ATGAGCCACTGTGCCTGGCCAAGAAATT	1	73121881	73121909	GTGAGCCACTGTGCCTGGCCNNNNNNNN
chr9	chr9	10	GTGAGCCACTGTGCCTGGCCTAGGCTCT	0	19218063	19218091	GTGAGCCACTGTGCCTGGCCNNNNNNNN
chr9	chr9	10	GTGAGCCACTGCGCCTGGCCGAGAGTTA	1	15417581	15417609	GTGAGCCACTGTGCCTGGCCNNNNNNNN
chr9	chr9	10	GTGAGCCACCGTGCCTGGCCAGGAAACA	1	140502712	140502740	GTGAGCCACTGTGCCTGGCCNNNNNNNN
chr9	chr9	10	GTGAGCCACTGTGCCTGGCCCCGAGAGC	0	139320512	139320540	GTGAGCCACTGTGCCTGGCCNNNNNNNN
chr9	chr9	10	TTGAGCCACTGTGCCTAGCCTGGAGTAG	2	119686397	119686425	GTGAGCCACTGTGCCTGGCCNNNNNNNN
chr9	chr9	10	GTGAGCCACTGTGCCTGGCCTTGAGGTT	0	111323372	111323400	GTGAGCCACTGTGCCTGGCCNNNNNNNN
chr9	chr9	10	GTGAACCACTGTGCCCAGCCTAGAATTA	3	108064912	108064940	GTGAGCCACTGTGCCTGGCCNNNNNNNN
chr8	chr8	10	GTGAGCCACTGTGCCTGGCCAAGAAAGA	0	61547474	61547502	GTGAGCCACTGTGCCTGGCCNNNNNNNN
chr8	chr8	10	GTGAGCCACCGTGCCCGGCCAGGGATAT	2	41899686	41899714	GTGAGCCACTGTGCCTGGCCNNNNNNNN
chr8	chr8	10	ATGAGCCACTGTGCCCAGCCAAGAGTAC	3	39765967	39765995	GTGAGCCACTGTGCCTGGCCNNNNNNNN
chr8	chr8	10	GTGAGCCACTGCGCCCAGCCATGGGTAA	3	118115987	118116015	GTGAGCCACTGTGCCTGGCCNNNNNNNN
chr7	chr7	10	GTGAGCCACTGTGCCCAGCCCGGAATTA	2	73431136	73431164	GTGAGCCACTGTGCCTGGCCNNNNNNNN
chr7	chr7	10	TTGAGCCACTGTGCCTGGCCCAGAATTT	1	5174058	5174086	GTGAGCCACTGTGCCTGGCCNNNNNNNN
chr7	chr7	10	GTGAGCCACCATGCCTGGCCGGGGGTTG	2	51332077	51332105	GTGAGCCACTGTGCCTGGCCNNNNNNNN
chr7	chr7	10	ATGAGCCACTGTGCCCAGCCTGGGATTG	3	41182314	41182342	GTGAGCCACTGTGCCTGGCCNNNNNNNN
chr7	chr7	10	ATGAGCCACTGTGCCTGGCCTGGGAGCA	1	27366552	27366580	GTGAGCCACTGTGCCTGGCCNNNNNNNN
chr7	chr7	10	ATGAGCCACTGTGCCTGGCCACGATCCC	1	155368244	155368272	GTGAGCCACTGTGCCTGGCCNNNNNNNN
chr7	chr7	10	GTGAGCCACTGCGCCCGGCCGTGAGGAT	2	148400902	148400930	GTGAGCCACTGTGCCTGGCCNNNNNNNN
chr7	chr7	10	GTGAGCCATTGGGCCTGGCCAAGGGTAC	2	138923447	138923475	GTGAGCCACTGTGCCTGGCCNNNNNNNN
chr7	chr7	10	GTGAGCCACTGTGCCTGGCCATGGGGGA	0	138401588	138401616	GTGAGCCACTGTGCCTGGCCNNNNNNNN
chr7	chr7	10	GTGAGCCACCGTGCCTGGCCTAGAACAG	1	129607345	129607373	GTGAGCCACTGTGCCTGGCCNNNNNNNN
chr7	chr7	10	ATGAGCCACTATGCCTGGCCGAGAATTT	2	129543312	129543340	GTGAGCCACTGTGCCTGGCCNNNNNNNN
chr7	chr7	10	GTGAGCCACCGCGCCTGGCCTGGAGTCA	2	1112555	1112583	GTGAGCCACTGTGCCTGGCCNNNNNNNN
chr7	chr7	10	GTGAGCCACTGCGCCTGGCCAAGAGGAT	1	104646294	104646322	GTGAGCCACTGTGCCTGGCCNNNNNNNN
chr7	chr7	10	ATGAGCCACTGTGCCTGGCCAAGAGAGA	1	100708544	100708572	GTGAGCCACTGTGCCTGGCCNNNNNNNN
chr6	chr6	10	GTGAGCCACTGTGCCCGGCCTGGAATTT	1	99391158	99391186	GTGAGCCACTGTGCCTGGCCNNNNNNNN
chr6	chr6	10	GTGAGCCACTGTGCCCAGCCTGGGGTCT	2	88100651	88100679	GTGAGCCACTGTGCCTGGCCNNNNNNNN
chr6	chr6	10	GTGAGCCACTGCGCCAGGCCAAGAATGG	2	52807891	52807919	GTGAGCCACTGTGCCTGGCCNNNNNNNN
chr6	chr6	10	ATGAGCCACTGGGCCTGGCCAGGAGTTT	2	34322067	34322095	GTGAGCCACTGTGCCTGGCCNNNNNNNN
chr6	chr6	10	GTGAGCCACTGTGCCTGGCCAAGAGGAT	0	3031446	3031474	GTGAGCCACTGTGCCTGGCCNNNNNNNN
chr6	chr6	10	GTGAGCCACTGTGCCTGGCCTGGGGGCA	0	17209880	17209908	GTGAGCCACTGTGCCTGGCCNNNNNNNN
chr6	chr6	10	GTGAGCCACTGTGCCCAGCCAAGAATGA	2	154647069	154647097	GTGAGCCACTGTGCCTGGCCNNNNNNNN
chr6	chr6	10	GAGAGCCACCGTGCCTGGCCAAGAGGAG	2	154573520	154573548	GTGAGCCACTGTGCCTGGCCNNNNNNNN
chr6	chr6	10	GTGAGCCACTGTGCCCAGCCAAGGGTCA	2	1406228	1406256	GTGAGCCACTGTGCCTGGCCNNNNNNNN
chr6	chr6	10	GTGAGCCACAGTGCCTGGCCAAGAATAA	1	139705548	139705576	GTGAGCCACTGTGCCTGGCCNNNNNNNN
chr6	chr6	10	GTGAGCCACCGTGCCTGGCCAGGAGCCT	1	113804421	113804449	GTGAGCCACTGTGCCTGGCCNNNNNNNN
chr5	chr5	10	GTGAGCCACTGTGCCTGGCCTGGAACTA	0	86456136	86456164	GTGAGCCACTGTGCCTGGCCNNNNNNNN
chr5	chr5	10	GTGAGCCACTGCGCCTGGCCTAGGATTT	1	77488176	77488204	GTGAGCCACTGTGCCTGGCCNNNNNNNN
chr5	chr5	10	GTGAGCCACTGTGCCCAGCCCTGAGTGT	2	72247277	72247305	GTGAGCCACTGTGCCTGGCCNNNNNNNN
chr5	chr5	10	GTGAGCCACTGTGCCCAGCCTGGAAATC	2	71993352	71993380	GTGAGCCACTGTGCCTGGCCNNNNNNNN
chr5	chr5	10	GTGAGCCACTGTGCCTGGCCCTGAAAAA	0	55420612	55420640	GTGAGCCACTGTGCCTGGCCNNNNNNNN
chr5	chr5	10	GTGAGCCACTGTGCCTGGCCTTGGAGTA	0	55264731	55264759	GTGAGCCACTGTGCCTGGCCNNNNNNNN
chr5	chr5	10	GTGAGCCACTATGCCCAGCCAGGAGTAG	3	35447967	35447995	GTGAGCCACTGTGCCTGGCCNNNNNNNN
chr5	chr5	10	GTGAGCCACCATGCCTGGCCTAGAGTCC	2	175904367	175904395	GTGAGCCACTGTGCCTGGCCNNNNNNNN
chr5	chr5	10	ATGAGCCACTGTGCCCAGCCCAGAGTTC	3	137290590	137290618	GTGAGCCACTGTGCCTGGCCNNNNNNNN
chr5	chr5	10	GTGAGCCACCGTGCCCGGCCCGGGGTTT	2	132076169	132076197	GTGAGCCACTGTGCCTGGCCNNNNNNNN
chr5	chr5	10	GTGAGCCACCGTGCCTGGCCTGGAGACC	1	111565395	111565423	GTGAGCCACTGTGCCTGGCCNNNNNNNN
chr5	chr5	10	GTGAGCCACCGTGCCCAGCCAGGAGTTT	3	10368964	10368992	GTGAGCCACTGTGCCTGGCCNNNNNNNN
chr4	chr4	10	GTAAGCCACTGTGCCTGGCCAGGAAAAT	1	89592954	89592982	GTGAGCCACTGTGCCTGGCCNNNNNNNN
chr4	chr4	10	GTGAGCCACTGCGCCTGGCCAGGAATTC	1	55007435	55007463	GTGAGCCACTGTGCCTGGCCNNNNNNNN
chr4	chr4	10	GTGAGCCACTGTGCCCAGCCTGGAATAT	2	36252048	36252076	GTGAGCCACTGTGCCTGGCCNNNNNNNN
chr4	chr4	10	GTGAGCCACTGCACCTGGCCAGGAGTTT	2	30934926	30934954	GTGAGCCACTGTGCCTGGCCNNNNNNNN
chr4	chr4	10	ATGAGCCACCGTGCCTGGCCAAGAATAT	2	2972096	2972124	GTGAGCCACTGTGCCTGGCCNNNNNNNN
chr4	chr4	10	GTGAGCCACTGTGCCTGGCCAAGAAAAT	0	176784862	176784890	GTGAGCCACTGTGCCTGGCCNNNNNNNN
chr4	chr4	10	GTGAGCCACTGTGCCTGGCCCAGAGATT	0	169729136	169729164	GTGAGCCACTGTGCCTGGCCNNNNNNNN
chr4	chr4	10	GTGAGCCACTGTACCTGGCCAAGAATAC	1	153710521	153710549	GTGAGCCACTGTGCCTGGCCNNNNNNNN
chr4	chr4	10	GTGAGCCACTGCGCCTGGCCGGGAAGTC	1	153171437	153171465	GTGAGCCACTGTGCCTGGCCNNNNNNNN
chr4	chr4	10	GTGAGCCACCATGCCTGGCCAAGAGTAG	2	151992878	151992906	GTGAGCCACTGTGCCTGGCCNNNNNNNN
chr4	chr4	10	GTGAGCCACCATGCCTGGCCTAGAGTCC	2	110330897	110330925	GTGAGCCACTGTGCCTGGCCNNNNNNNN
chr3	chr3	10	GTGAGCCACTGCGCCTGGCCTAGAATTA	1	65889392	65889420	GTGAGCCACTGTGCCTGGCCNNNNNNNN
chr3	chr3	10	GTGAGCCACCGTGCCTGGCCCAGAATGG	1	61397711	61397739	GTGAGCCACTGTGCCTGGCCNNNNNNNN
chr3	chr3	10	GTGAGCCACCATGCCTGGCCTAGGGTTT	2	52250240	52250268	GTGAGCCACTGTGCCTGGCCNNNNNNNN
chr3	chr3	10	ATGAGCCACTGTGCCCGGCCCAGAGTGG	2	49302636	49302664	GTGAGCCACTGTGCCTGGCCNNNNNNNN
chr3	chr3	10	GTGAGCCACCGTGCCCAGCCTGGAATAC	3	47232706	47232734	GTGAGCCACTGTGCCTGGCCNNNNNNNN
chr3	chr3	10	ATGAGCCACTGTGCCTGACCTGGAGTCA	2	45251514	45251542	GTGAGCCACTGTGCCTGGCCNNNNNNNN
chr3	chr3	10	GTGAGCCACTGTGCCCGGCCAGGAGCTA	1	19941274	19941302	GTGAGCCACTGTGCCTGGCCNNNNNNNN
chr3	chr3	10	GTGAGCCACTGTGCCCGGCCAGGAGTAG	1	194362554	194362582	GTGAGCCACTGTGCCTGGCCNNNNNNNN
chr3	chr3	10	ATGAGCCACCATGCCTGGCCAGGGGTCT	3	193094280	193094308	GTGAGCCACTGTGCCTGGCCNNNNNNNN
chr3	chr3	10	GTGAGCCACCGCGCCTGGCCAAGGGTCA	2	189404797	189404825	GTGAGCCACTGTGCCTGGCCNNNNNNNN
chr3	chr3	10	GTGAGCCACCGTGCCTGGCCAAGAATTT	1	186464908	186464936	GTGAGCCACTGTGCCTGGCCNNNNNNNN
chr3	chr3	10	GTGAGCCACCGTGCCTGGCCCAGAGTAA	1	177194003	177194031	GTGAGCCACTGTGCCTGGCCNNNNNNNN
chr3	chr3	10	GTGAGCCACTGTGCCTGGCCAGGATCCT	0	172259189	172259217	GTGAGCCACTGTGCCTGGCCNNNNNNNN
chr3	chr3	10	GTGAGCCACTGTGCCTGGCCCAGAAAAT	0	168977225	168977253	GTGAGCCACTGTGCCTGGCCNNNNNNNN
chr3	chr3	10	GTGAGCCACCGTGCCTGGCCGAGAGTGA	1	167986214	167986242	GTGAGCCACTGTGCCTGGCCNNNNNNNN
chr3	chr3	10	GTGAGCCACCGTGCCTGGCCAAGATATT	1	134409870	134409898	GTGAGCCACTGTGCCTGGCCNNNNNNNN
chr3	chr3	10	GTGAGCCACTGTGCCCAGCCTAGAGTTT	2	132392471	132392499	GTGAGCCACTGTGCCTGGCCNNNNNNNN
chr3	chr3	10	GTGAGCCACCGTGCCCGGCCTAGGGTTT	2	130707806	130707834	GTGAGCCACTGTGCCTGGCCNNNNNNNN
chr3	chr3	10	GTGAGCCACTGTGCCCAGCCAGGAATGT	2	101226604	101226632	GTGAGCCACTGTGCCTGGCCNNNNNNNN
chr3	chr3	10	GTGAGCCACTGCACCTGGCCAGGAGTAG	2	101120082	101120110	GTGAGCCACTGTGCCTGGCCNNNNNNNN
chr2	chr2	10	GTGAGCCACTGTGCCCGGCCAAGAATTT	1	88602240	88602268	GTGAGCCACTGTGCCTGGCCNNNNNNNN
chr2	chr2	10	GTGAACCACTGTGCCCAGCCAGGAATTT	3	8836255	8836283	GTGAGCCACTGTGCCTGGCCNNNNNNNN
chr2	chr2	10	ATGAGCCACTGTGCCCAGCCTAGGATGA	3	85635175	85635203	GTGAGCCACTGTGCCTGGCCNNNNNNNN
chr2	chr2	10	GTGAGCCACTGCGCCTGGCCATGGGCTT	1	73632321	73632349	GTGAGCCACTGTGCCTGGCCNNNNNNNN
chr2	chr2	10	GTGAGCCACTGCGCCCGGCCTGGGGTGA	2	64425425	64425453	GTGAGCCACTGTGCCTGGCCNNNNNNNN
chr2	chr2	10	GTGAGCCACTGTGCCTGGCCTGGAGGGA	0	61384456	61384484	GTGAGCCACTGTGCCTGGCCNNNNNNNN
chr2	chr2	10	GTGAGCCACTGTGCCCGGCCTGGAGTGT	1	242152257	242152285	GTGAGCCACTGTGCCTGGCCNNNNNNNN
chr2	chr2	10	GTGAGCCACTGTGCCCAGCCAGGAATTT	2	229572099	229572127	GTGAGCCACTGTGCCTGGCCNNNNNNNN
chr22	chr22	10	GTGAGCCACTGTGCCTGGCCTGGAACGG	0	25626402	25626430	GTGAGCCACTGTGCCTGGCCNNNNNNNN
chr2	chr2	10	GTGAGCCACCGTGCCTGGCCATGGATTT	1	201998741	201998769	GTGAGCCACTGTGCCTGGCCNNNNNNNN
chr21	chr21	10	ATGAGCCACTGTGCCTGGCCCTGAATTT	1	40298304	40298332	GTGAGCCACTGTGCCTGGCCNNNNNNNN
chr21	chr21	10	GTGAGCCACTGTGCCTGGCCCTGAACAA	0	22895224	22895252	GTGAGCCACTGTGCCTGGCCNNNNNNNN
chr21	chr21	10	GTGAGCCACTGCGCCCAGCCCAGAGTAA	3	19263657	19263685	GTGAGCCACTGTGCCTGGCCNNNNNNNN
chr2	chr2	10	GTGAGCCACTGTGCCTGGCCCTGAAGTT	0	11811885	11811913	GTGAGCCACTGTGCCTGGCCNNNNNNNN
chr20	chr20	10	GTGAGCCACCGTGCCTGGCCGGGAGATC	1	48636014	48636042	GTGAGCCACTGTGCCTGGCCNNNNNNNN
chr20	chr20	10	GTGAGCCACTGTGCCCGGCCTGGAGCAC	1	48565253	48565281	GTGAGCCACTGTGCCTGGCCNNNNNNNN
chr20	chr20	10	GTGAGCCACTGTGCCTGGCCGAGGACAG	0	36507971	36507999	GTGAGCCACTGTGCCTGGCCNNNNNNNN
chr19	chr19	10	GTGAGCCACTGCGCCTGGCCTGGAATCC	1	58973521	58973549	GTGAGCCACTGTGCCTGGCCNNNNNNNN
chr19	chr19	10	GTGAGCCACTGTGCCTGGCCTAAAGTTC	0	49321278	49321306	GTGAGCCACTGTGCCTGGCCNNNNNNNN
chr19	chr19	10	ATGAGCCACTATGCCCAGCCTGGAATGT	4	47739204	47739232	GTGAGCCACTGTGCCTGGCCNNNNNNNN
chr19	chr19	10	GTGAGCCACTGTGCCTAGCCCTGAGATT	1	44968038	44968066	GTGAGCCACTGTGCCTGGCCNNNNNNNN
chr19	chr19	10	GTGAGCCACCATGCCTGGCCAAGAGTCT	2	39231149	39231177	GTGAGCCACTGTGCCTGGCCNNNNNNNN
chr1	chr1	10	ATGAGCCACTGTGCCTGGCCAGGAGCCA	1	93383985	93384013	GTGAGCCACTGTGCCTGGCCNNNNNNNN
chr19	chr19	10	GTGAGCCACTGTGCCCAGCCTGGGATTC	2	30137805	30137833	GTGAGCCACTGTGCCTGGCCNNNNNNNN
chr19	chr19	10	GTGAGCCACTACGCCTGGCCTAGAATCA	2	17181589	17181617	GTGAGCCACTGTGCCTGGCCNNNNNNNN
chr19	chr19	10	GTGAGCCACTGCGCCTGGCCTGGAGATC	1	14366848	14366876	GTGAGCCACTGTGCCTGGCCNNNNNNNN
chr19	chr19	10	GTGAGCCACTGCGCCCGGCCGAGGGTCA	2	12794669	12794697	GTGAGCCACTGTGCCTGGCCNNNNNNNN
chr18	chr18	10	GTGAGCCACTGCGCCCAGCCAGGAGTCT	3	6077739	6077767	GTGAGCCACTGTGCCTGGCCNNNNNNNN
chr1	chr1	10	GTGAACCACTGTGCCAGGCCAAGGGTGA	2	85391848	85391876	GTGAGCCACTGTGCCTGGCCNNNNNNNN
chr1	chr1	10	ATGAGCCACTGTGCCCGGCCCAGGGTAA	2	8261330	8261358	GTGAGCCACTGTGCCTGGCCNNNNNNNN
chr18	chr18	10	GTGAGCCACTGCGCCAGGCCAAGAGTCT	2	13225114	13225142	GTGAGCCACTGTGCCTGGCCNNNNNNNN
chr17	chr17	10	GTGAGCCACTGTGCCTGGCCCAGATTTT	0	80178974	80179002	GTGAGCCACTGTGCCTGGCCNNNNNNNN
chr17	chr17	10	GTGAGCCACTGCGCCTGGCCTAGGATTT	1	78366669	78366697	GTGAGCCACTGTGCCTGGCCNNNNNNNN
chr17	chr17	10	GTGAGCCACTGTACCTGGCCCAGAGTTA	1	7770929	7770957	GTGAGCCACTGTGCCTGGCCNNNNNNNN
chr17	chr17	10	GTGAGCCACCGTGCCCAGCCCAGGGTTT	3	7526057	7526085	GTGAGCCACTGTGCCTGGCCNNNNNNNN
chr17	chr17	10	GTGAGCCACTGTGCCCAGCCCTGAATTA	2	72940561	72940589	GTGAGCCACTGTGCCTGGCCNNNNNNNN
chr17	chr17	10	GTGAGCCACTATGCCTGGCCCAGACATT	1	72762621	72762649	GTGAGCCACTGTGCCTGGCCNNNNNNNN
chr17	chr17	10	ATGAACCACTGTGCCCAGCCTAGAGTGG	4	62698061	62698089	GTGAGCCACTGTGCCTGGCCNNNNNNNN
chr17	chr17	10	GTGAGCCACTGTGCCTGGCCCTGGAATC	0	58776126	58776154	GTGAGCCACTGTGCCTGGCCNNNNNNNN
chr17	chr17	10	GTGAGCCACCGTGCCCAGCCCAGAGTTC	3	56188854	56188882	GTGAGCCACTGTGCCTGGCCNNNNNNNN
chr17	chr17	10	GTGAGCCACCGTGCCCGGCCAAGGGTGG	2	5500769	5500797	GTGAGCCACTGTGCCTGGCCNNNNNNNN
chr17	chr17	10	ATGAGCCACCGTGCCTGGCCCCGAATGA	2	46216822	46216850	GTGAGCCACTGTGCCTGGCCNNNNNNNN
chr17	chr17	10	GTGAGCCACTGCGCCTGGCCAGGAGTTT	1	43251332	43251360	GTGAGCCACTGTGCCTGGCCNNNNNNNN
chr17	chr17	10	GTGAGCCACTGTGCCCAGCCAAGAATAA	2	1713368	1713396	GTGAGCCACTGTGCCTGGCCNNNNNNNN
chr16	chr16	10	GTGAGCCACTGTGCCCGGCCTAGAATTT	1	89765174	89765202	GTGAGCCACTGTGCCTGGCCNNNNNNNN
chr16	chr16	10	GTGAGCCACTGTGCCTGGCCTAGAGGAG	0	86146584	86146612	GTGAGCCACTGTGCCTGGCCNNNNNNNN
chr1	chr1	10	GTGAGCCACTGTGCCTGGCCAACAGTAA	0	67879041	67879069	GTGAGCCACTGTGCCTGGCCNNNNNNNN
chr1	chr1	10	ATGAGCCACTATGCCTGGCCTGGAATTT	2	67649626	67649654	GTGAGCCACTGTGCCTGGCCNNNNNNNN
chr16	chr16	10	ATGAGCCACTGTGCCCAGCCAAGAAACG	3	74643497	74643525	GTGAGCCACTGTGCCTGGCCNNNNNNNN
chr16	chr16	10	GTGAGCCACTGTGCCTGGCCCAGATTAC	0	54606057	54606085	GTGAGCCACTGTGCCTGGCCNNNNNNNN
chr16	chr16	10	GTGAGCCACTGTGCCTGGCCCACAAGTA	0	4866696	4866724	GTGAGCCACTGTGCCTGGCCNNNNNNNN
chr1	chr1	10	GTGAGCCACCATGCCTGGCCAGGAATCA	2	6460568	6460596	GTGAGCCACTGTGCCTGGCCNNNNNNNN
chr16	chr16	10	GTGAGCCACTGTGCCTGGCCCTGATTTA	0	4293059	4293087	GTGAGCCACTGTGCCTGGCCNNNNNNNN
chr16	chr16	10	GTGAGCCACCGTGCCTGGCCTAGGATTG	1	21558874	21558902	GTGAGCCACTGTGCCTGGCCNNNNNNNN
chr16	chr16	10	GTGAACCACTGTGCCTGGCCCAGGATAT	1	14575963	14575991	GTGAGCCACTGTGCCTGGCCNNNNNNNN
chr15	chr15	10	GTGAGCCACCGTGCCTGGCCAGGGGATG	1	95275754	95275782	GTGAGCCACTGTGCCTGGCCNNNNNNNN
chr15	chr15	10	GTGAGCCACCGTGCCCAGCCTTGGGTTT	3	74974669	74974697	GTGAGCCACTGTGCCTGGCCNNNNNNNN
chr15	chr15	10	GTGAGCCACCGTGCCTAGCCTGGAATTA	2	67643043	67643071	GTGAGCCACTGTGCCTGGCCNNNNNNNN
chr15	chr15	10	GTGAGCCACCGTGCCTGGCCGAGAAGAG	1	65294446	65294474	GTGAGCCACTGTGCCTGGCCNNNNNNNN
chr15	chr15	10	GTGAGCCACCATGCCTGGCCTCGAGTTC	2	57003572	57003600	GTGAGCCACTGTGCCTGGCCNNNNNNNN
chr15	chr15	10	ATGAGCCACTGTGCCTGGCCCAGAATCC	1	22946657	22946685	GTGAGCCACTGTGCCTGGCCNNNNNNNN
chr14	chr14	10	GTGAGCCACTGTGCCTGGCCTAGAAGGC	0	84976274	84976302	GTGAGCCACTGTGCCTGGCCNNNNNNNN
chr14	chr14	10	ATGAGCCACTGTGCCCAGCCAAGAAACG	3	67733536	67733564	GTGAGCCACTGTGCCTGGCCNNNNNNNN
chr14	chr14	10	ATGAGCCACTGCGCCTGGCCTAGAATTC	2	64084482	64084510	GTGAGCCACTGTGCCTGGCCNNNNNNNN
chr14	chr14	10	GTGAGCCACTGCACCTGGCCAAGAATTG	2	64082670	64082698	GTGAGCCACTGTGCCTGGCCNNNNNNNN
chr14	chr14	10	GTGAGCCACTGTGCCCGGCCAAGAACAT	1	53153305	53153333	GTGAGCCACTGTGCCTGGCCNNNNNNNN
chr14	chr14	10	GTGAGCCACTATGCCTAGCCAAGAATTT	2	46674738	46674766	GTGAGCCACTGTGCCTGGCCNNNNNNNN
chr1	chr1	10	GTGAGCCACTGTGCCTGGCCCGAGGTTA	0	44475290	44475318	GTGAGCCACTGTGCCTGGCCNNNNNNNN
chr1	chr1	10	ATGAGCCACTGTGCCCGGCCAAGAAATT	2	43485888	43485916	GTGAGCCACTGTGCCTGGCCNNNNNNNN
chr14	chr14	10	GTGAGCCACTGCGCCCAGCCATGAGTGT	3	32848405	32848433	GTGAGCCACTGTGCCTGGCCNNNNNNNN
chr13	chr13	10	GTGAGCCACTGTGCCTGGCCAAGAGCAG	0	59236486	59236514	GTGAGCCACTGTGCCTGGCCNNNNNNNN
chr13	chr13	10	GTGAGCCACCATGCCTGGCCTAGAGTTC	2	24775856	24775884	GTGAGCCACTGTGCCTGGCCNNNNNNNN
chr13	chr13	10	GTGAGCCACTGTGCCTGGCCTCGGGACT	0	21551244	21551272	GTGAGCCACTGTGCCTGGCCNNNNNNNN
chr1	chr1	10	GTGAGCCACTGTGCCTGGCCTAGGTATG	0	31269250	31269278	GTGAGCCACTGTGCCTGGCCNNNNNNNN
chr1	chr1	10	GTGAGCCACTGTGCCTGGCCAGGGAGAC	0	28545126	28545154	GTGAGCCACTGTGCCTGGCCNNNNNNNN
chr1	chr1	10	GTGAGCCACTGTGCCTGGCCAGGGAGAC	0	28543841	28543869	GTGAGCCACTGTGCCTGGCCNNNNNNNN
chr1	chr1	10	ATGAGCCACCATGCCTGGCCATGGGTAG	3	27550116	27550144	GTGAGCCACTGTGCCTGGCCNNNNNNNN
chr12	chr12	10	GTGAGCCACTGTGCCTGGCCTGGAGCAG	0	70028703	70028731	GTGAGCCACTGTGCCTGGCCNNNNNNNN
chr12	chr12	10	ATGAGCCACTGTGCCTGGCCAGGAGAGG	1	68695738	68695766	GTGAGCCACTGTGCCTGGCCNNNNNNNN
chr12	chr12	10	ATGAGCCACTGTGCCCGGCCATGAGTAT	2	67903173	67903201	GTGAGCCACTGTGCCTGGCCNNNNNNNN
chr12	chr12	10	GTGAGCCACTGCGCCTGGCCAAGAGTAT	1	53358242	53358270	GTGAGCCACTGTGCCTGGCCNNNNNNNN
chr12	chr12	10	ATGAGCCACTGTGCCTGGCCCAGAAGCA	1	51629290	51629318	GTGAGCCACTGTGCCTGGCCNNNNNNNN
chr12	chr12	10	GTGAGCCACCGTGCCCAGCCGAGAATGT	3	44294232	44294260	GTGAGCCACTGTGCCTGGCCNNNNNNNN
chr1	chr1	10	GTGAGCCACTGCGCCCAGCCAAGAATCT	3	242745600	242745628	GTGAGCCACTGTGCCTGGCCNNNNNNNN
chr1	chr1	10	GTGAGCCACCATGCCTGGCCCTGAGTTA	2	236717401	236717429	GTGAGCCACTGTGCCTGGCCNNNNNNNN
chr1	chr1	10	ATGAGCCACTGTGCCCGGCCAAGAATTT	2	236111119	236111147	GTGAGCCACTGTGCCTGGCCNNNNNNNN
chr12	chr12	10	GTGAGCCACTGTGCCCGGCCTGGAGAGG	1	31966602	31966630	GTGAGCCACTGTGCCTGGCCNNNNNNNN
chr1	chr1	10	GTGAGCCACTGTACCTGGCCAAGAGGTG	1	230732531	230732559	GTGAGCCACTGTGCCTGGCCNNNNNNNN
chr1	chr1	10	GTGAGCCACCGCGCCTGGCCAAGAGTTT	2	227120182	227120210	GTGAGCCACTGTGCCTGGCCNNNNNNNN
chr12	chr12	10	GTGAGCCACCGTGCCCGGCCATGAATCA	2	23711816	23711844	GTGAGCCACTGTGCCTGGCCNNNNNNNN
chr1	chr1	10	GTGAGCCACCGTGCCTGGCCGAGGATGC	1	221360481	221360509	GTGAGCCACTGTGCCTGGCCNNNNNNNN
chr1	chr1	10	GTGAACCACTGTGCCTGGCCCCGAAACC	1	220066834	220066862	GTGAGCCACTGTGCCTGGCCNNNNNNNN
chr12	chr12	10	GTGAGCCACTGCACCTGGCCTTGAGTTA	2	15073585	15073613	GTGAGCCACTGTGCCTGGCCNNNNNNNN
chr12	chr12	10	GTGAGCCACTGTGCCCAGCCAAGAATTA	2	106106571	106106599	GTGAGCCACTGTGCCTGGCCNNNNNNNN
chr12	chr12	10	GTGAGCCACCATGCCTGGCCAAGAGTCC	2	101755111	101755139	GTGAGCCACTGTGCCTGGCCNNNNNNNN
chr1	chr1	10	GTGAGCCACTGCGCCTGGCCTAGAGACC	1	201015941	201015969	GTGAGCCACTGTGCCTGGCCNNNNNNNN
chr1	chr1	10	GTGAGCCACTGTGCCTGGCTCAGAATGT	1	182276388	182276416	GTGAGCCACTGTGCCTGGCCNNNNNNNN
chr11	chr11	10	GTGAGCCACCGTGCCTGGCCTTGAGTTT	1	74584992	74585020	GTGAGCCACTGTGCCTGGCCNNNNNNNN
chr1	chr1	10	GTGAGCCACTGTGCCCAGCCCAGAATTT	2	164003844	164003872	GTGAGCCACTGTGCCTGGCCNNNNNNNN
chr1	chr1	10	GTGAGCCACTGCGCCTGGCCAAGAAACT	1	155076136	155076164	GTGAGCCACTGTGCCTGGCCNNNNNNNN
chr11	chr11	10	GTGAGCCACTGTGCCTGGCTAGGAGTCT	1	18307801	18307829	GTGAGCCACTGTGCCTGGCCNNNNNNNN
chr11	chr11	10	GTGAGCCACCGTGCCTGGCCCAGAATCA	1	15437878	15437906	GTGAGCCACTGTGCCTGGCCNNNNNNNN
chr11	chr11	10	GTGAGCCACTGCGCCCAGCCATGAGTTG	3	134141058	134141086	GTGAGCCACTGTGCCTGGCCNNNNNNNN
chr11	chr11	10	GTGAGCCACTGCGCCTGGCCGGGAGGAA	1	125437889	125437917	GTGAGCCACTGTGCCTGGCCNNNNNNNN
chr11	chr11	10	GTGAGCCACTGTGCCCGGCCTTAAGTTC	1	108466638	108466666	GTGAGCCACTGTGCCTGGCCNNNNNNNN
chr10	chr10	10	GTGAGCCACCGTGCCTGGCCAAGGATAG	1	95870098	95870126	GTGAGCCACTGTGCCTGGCCNNNNNNNN
chr10	chr10	10	GTGAGCCACCATGCCTGGCCCAGAGTAT	2	83664045	83664073	GTGAGCCACTGTGCCTGGCCNNNNNNNN
chr10	chr10	10	ATGAGCCACTGCGCCTGGCCAGGAATAC	2	69961899	69961927	GTGAGCCACTGTGCCTGGCCNNNNNNNN
chr10	chr10	10	GTGAGCCACTGTGCCTGGCCTAGATTCA	0	3715172	3715200	GTGAGCCACTGTGCCTGGCCNNNNNNNN
chr10	chr10	10	GTGAGCCACCGTGCCTGGCCAAGAAGCC	1	20998289	20998317	GTGAGCCACTGTGCCTGGCCNNNNNNNN
chr10	chr10	10	GTGAGCCACCATGCCTGGCCAGGGGTTA	2	19696108	19696136	GTGAGCCACTGTGCCTGGCCNNNNNNNN
chr10	chr10	10	ATGAGCCACCGTGCCTGGCCAGGAATTT	2	122541696	122541724	GTGAGCCACTGTGCCTGGCCNNNNNNNN
chrX	chrX	9	GTGAGCCACTGCGCCTGGCCTTGAAATG	1	63209505	63209533	GTGAGCCACTGTGCCTGGCCNNNNNNNN
chrX	chrX	9	GTGAGCCACTGTGCCCGGCCAAGAGCTC	1	48706869	48706897	GTGAGCCACTGTGCCTGGCCNNNNNNNN
chrX	chrX	9	GTGAGCCACTGTGCCCGGCCCAGAGTGA	1	45027209	45027237	GTGAGCCACTGTGCCTGGCCNNNNNNNN
chrX	chrX	9	GTGAGCCACTGTGCCCGGCCCAGGATTT	1	15625920	15625948	GTGAGCCACTGTGCCTGGCCNNNNNNNN
chrX	chrX	9	GTGAGCCACTGCGCCTGGCCAGGGATGC	1	15573611	15573639	GTGAGCCACTGTGCCTGGCCNNNNNNNN
chrX	chrX	9	GTGAGCCACCGTGCCTGGCCAGGGGTTG	1	149603487	149603515	GTGAGCCACTGTGCCTGGCCNNNNNNNN
chrX	chrX	9	ATGAGCCACTGTGCCCGGCCAGGAATAT	2	118976256	118976284	GTGAGCCACTGTGCCTGGCCNNNNNNNN
chrX	chrX	9	GTGAGGCACTGTGCCTGGCCAAGAATTT	1	108758402	108758430	GTGAGCCACTGTGCCTGGCCNNNNNNNN
chrX	chrX	9	GTGAGCTACTGTGCCCAGCCAGGAGTAC	3	100548794	100548822	GTGAGCCACTGTGCCTGGCCNNNNNNNN
chr9	chr9	9	ATGAGCCACTGTGCCTGGCCAAGAAGCT	1	97751796	97751824	GTGAGCCACTGTGCCTGGCCNNNNNNNN
chr9	chr9	9	GTGAGCCACTGTGCCCGGCCTAGAATTC	1	96202243	96202271	GTGAGCCACTGTGCCTGGCCNNNNNNNN
chr9	chr9	9	GTGAGCCACTGTGCCCGGCCTGGAGTGC	1	491546	491574	GTGAGCCACTGTGCCTGGCCNNNNNNNN
chr9	chr9	9	GTGAGCCACTGTGCCCGGCCAAGAGAGT	1	4143276	4143304	GTGAGCCACTGTGCCTGGCCNNNNNNNN
chr9	chr9	9	GTGAGCCACTGTGCCTGGCCGTGGACAG	0	35768338	35768366	GTGAGCCACTGTGCCTGGCCNNNNNNNN
chr9	chr9	9	GTGAGCCACTGTGCCCGGCTAGGAGTTA	2	20627215	20627243	GTGAGCCACTGTGCCTGGCCNNNNNNNN
chr9	chr9	9	GTGAGCCACCGTGCCCAGCCTGGAATGG	3	135907594	135907622	GTGAGCCACTGTGCCTGGCCNNNNNNNN
chr9	chr9	9	GTGAGCCACCGTGCCTGGCCAAGAAACC	1	132986404	132986432	GTGAGCCACTGTGCCTGGCCNNNNNNNN
chr9	chr9	9	GTGAGCCACTGTGCCTGGCCCAGAAGAG	0	132936823	132936851	GTGAGCCACTGTGCCTGGCCNNNNNNNN
chr9	chr9	9	GTGAGTCACCGTGCCTGGCCAAGGGTAA	2	131621351	131621379	GTGAGCCACTGTGCCTGGCCNNNNNNNN
chr9	chr9	9	ATGAGCCACTGTGCCTGGCCAAGAAGCC	1	129272788	129272816	GTGAGCCACTGTGCCTGGCCNNNNNNNN
chr9	chr9	9	ATGAGCCACTGTGCCTGGCCAAGACTTT	1	114673306	114673334	GTGAGCCACTGTGCCTGGCCNNNNNNNN
chr8	chr8	9	GTGAGCCACTGCACCTGGCCAGGAGTCA	2	82778594	82778622	GTGAGCCACTGTGCCTGGCCNNNNNNNN
chr8	chr8	9	GTGAGCCACTGTGCCTGGCCTAGATTGG	0	74543300	74543328	GTGAGCCACTGTGCCTGGCCNNNNNNNN
chr8	chr8	9	GTGAGCCACCATGCCCGGCCAAGAGTTG	3	71431913	71431941	GTGAGCCACTGTGCCTGGCCNNNNNNNN
chr8	chr8	9	GTGAGCCACCGTGCCTGGCCGTGAGTTT	1	36103798	36103826	GTGAGCCACTGTGCCTGGCCNNNNNNNN
chr8	chr8	9	ATGAGCCACTGTGCCCGGCCTAGAGTGG	2	32194405	32194433	GTGAGCCACTGTGCCTGGCCNNNNNNNN
chr8	chr8	9	GTGAGCCACTGTGCCCAGCCAGGAATGT	2	28356361	28356389	GTGAGCCACTGTGCCTGGCCNNNNNNNN
chr8	chr8	9	GTGAGCCACTGTGCCTGGCCTAGAACAA	0	22834418	22834446	GTGAGCCACTGTGCCTGGCCNNNNNNNN
chr8	chr8	9	GTGAGCCACTGCGCCTGGCCAAGAATGT	1	19168842	19168870	GTGAGCCACTGTGCCTGGCCNNNNNNNN
chr7	chr7	9	GTGAGCCACTGTGCCTGGCCAGGATTAT	0	98900213	98900241	GTGAGCCACTGTGCCTGGCCNNNNNNNN
chr7	chr7	9	GTGAGCCACTGCGCCTGGCCTGGAGTTG	1	97511570	97511598	GTGAGCCACTGTGCCTGGCCNNNNNNNN
chr7	chr7	9	GTGAGCCACCATGCCTGGCCTAGAGTTT	2	95879205	95879233	GTGAGCCACTGTGCCTGGCCNNNNNNNN
chr7	chr7	9	GTGAGCCACTGTGCCTGGCCTAGAAAAG	0	88658697	88658725	GTGAGCCACTGTGCCTGGCCNNNNNNNN
chr7	chr7	9	GTGAGCCACCGCGCCTGGCCATGAATAT	2	81315769	81315797	GTGAGCCACTGTGCCTGGCCNNNNNNNN
chr7	chr7	9	GTGAGCCACTGCGCCCAGCCAAGAATGT	3	75840409	75840437	GTGAGCCACTGTGCCTGGCCNNNNNNNN
chr7	chr7	9	GTGAGCCACTGCGCCTGGCCCAGAATTT	1	70890486	70890514	GTGAGCCACTGTGCCTGGCCNNNNNNNN
chr7	chr7	9	ATGAGCCACTGTGCCCAGCCTGGAATGT	3	65324924	65324952	GTGAGCCACTGTGCCTGGCCNNNNNNNN
chr7	chr7	9	TTGAGCCACTGTGCCTGGCCCAGAATTT	1	5871766	5871794	GTGAGCCACTGTGCCTGGCCNNNNNNNN
chr7	chr7	9	GTGAGCCACTGTGCCTGGTCTAGGATAC	1	40195735	40195763	GTGAGCCACTGTGCCTGGCCNNNNNNNN
chr7	chr7	9	GTGAGCCACTGTGCCCGGCCTGGAAATG	1	33884760	33884788	GTGAGCCACTGTGCCTGGCCNNNNNNNN
chr7	chr7	9	GTGAGCCACCGTGCCCGGCCAAGAATTC	2	32594660	32594688	GTGAGCCACTGTGCCTGGCCNNNNNNNN
chr7	chr7	9	ATGAGCCACTATGCCCGGCCGAGAGTTT	3	152149509	152149537	GTGAGCCACTGTGCCTGGCCNNNNNNNN
chr7	chr7	9	GTGAGCCACTGTGCCTGGCCTAGGACAA	0	142827184	142827212	GTGAGCCACTGTGCCTGGCCNNNNNNNN
chr7	chr7	9	GTGAGCCACTGTGCCCGGCCGGGAAACA	1	13943097	13943125	GTGAGCCACTGTGCCTGGCCNNNNNNNN
chr7	chr7	9	GTGAGCCACTGTGCCCGGCCTCGAGACT	1	134155189	134155217	GTGAGCCACTGTGCCTGGCCNNNNNNNN
chr7	chr7	9	GTGAACCATTGTGCCTGGCCATGGATTT	2	129577960	129577988	GTGAGCCACTGTGCCTGGCCNNNNNNNN
chr7	chr7	9	GTGAGCCACAGTGCCTGGCCCGGAATTT	1	108242589	108242617	GTGAGCCACTGTGCCTGGCCNNNNNNNN
chr7	chr7	9	GTGAGCCACTGTGCCTGGCCTCGAGAAG	0	100140967	100140995	GTGAGCCACTGTGCCTGGCCNNNNNNNN
chr6	chr6	9	GTGAGCCACTGCGCCTGGCCCTGGGTAT	1	42883280	42883308	GTGAGCCACTGTGCCTGGCCNNNNNNNN
chr6	chr6	9	GTGAGCCACTGTGCCTGGCCTGGAGAGG	0	36129497	36129525	GTGAGCCACTGTGCCTGGCCNNNNNNNN
chr6	chr6	9	GTGAGCCACTATGCCTGGCCAGGAACCA	1	33612819	33612847	GTGAGCCACTGTGCCTGGCCNNNNNNNN
chr6	chr6	9	ATGAGCCACTGTGCCTGGCCAAGAATCT	1	22521949	22521977	GTGAGCCACTGTGCCTGGCCNNNNNNNN
chr6	chr6	9	GTGAGCCACTGCGCCTGGTCAAGAATTC	2	156673788	156673816	GTGAGCCACTGTGCCTGGCCNNNNNNNN
chr6	chr6	9	GTGAGCCACCATGCCTGGCCTGGAGATG	2	132471075	132471103	GTGAGCCACTGTGCCTGGCCNNNNNNNN
chr6	chr6	9	GTGAGCCACTGCGCCCAGCCTGGAATTT	3	119679400	119679428	GTGAGCCACTGTGCCTGGCCNNNNNNNN
chr6	chr6	9	GTGAGCCACCGTGCCTGGCCTAGAACTA	1	11174444	11174472	GTGAGCCACTGTGCCTGGCCNNNNNNNN
chr6	chr6	9	GTGAGCCACCATGCCTGGCCAGGAATGT	2	100179166	100179194	GTGAGCCACTGTGCCTGGCCNNNNNNNN
chr5	chr5	9	GTGAGCCACTGTGCCTGGCCCAGAATTT	0	80102195	80102223	GTGAGCCACTGTGCCTGGCCNNNNNNNN
chr5	chr5	9	GTGAGCCACTGTGCCCAGCCTGGAGACA	2	5034662	5034690	GTGAGCCACTGTGCCTGGCCNNNNNNNN
chr5	chr5	9	GTGAGCCACTGTGCCTGGCCAGGAGGTC	0	23510964	23510992	GTGAGCCACTGTGCCTGGCCNNNNNNNN
chr5	chr5	9	GTGAACCACTGTGCCTGGCCACGATTTT	1	172585213	172585241	GTGAGCCACTGTGCCTGGCCNNNNNNNN
chr5	chr5	9	GTGAGCCACTGCACCTGGCCCAGAGTAT	2	14847961	14847989	GTGAGCCACTGTGCCTGGCCNNNNNNNN
chr5	chr5	9	GTGAGCCACTGTGCCTGGCCCAGAATAT	0	141268551	141268579	GTGAGCCACTGTGCCTGGCCNNNNNNNN
chr5	chr5	9	GTGAGCCACCGCGCCTGGCCTTGAGTTA	2	115400891	115400919	GTGAGCCACTGTGCCTGGCCNNNNNNNN
chr5	chr5	9	GTGAGCCACTGTGCCCGGCCGTGAGTGA	1	110882582	110882610	GTGAGCCACTGTGCCTGGCCNNNNNNNN
chr4	chr4	9	GTGAGCCACTGTGCCTGGCCCAGATTCT	0	74197611	74197639	GTGAGCCACTGTGCCTGGCCNNNNNNNN
chr4	chr4	9	ATGAACCACTGTGCCTGGCCTAGGGTAG	2	72154395	72154423	GTGAGCCACTGTGCCTGGCCNNNNNNNN
chr4	chr4	9	GTGAGCCACTGTGCCTGGCCTTGAAATT	0	71956944	71956972	GTGAGCCACTGTGCCTGGCCNNNNNNNN
chr4	chr4	9	GTGAGCCACCGTGCCTGGCCCGGGGTGT	1	3012233	3012261	GTGAGCCACTGTGCCTGGCCNNNNNNNN
chr4	chr4	9	ATGAGCCACTGTGCCTGGCCCTGGATTT	1	26158401	26158429	GTGAGCCACTGTGCCTGGCCNNNNNNNN
chr4	chr4	9	ATGAGCCACTGTGCCTGGCCGGGAATGA	1	106862205	106862233	GTGAGCCACTGTGCCTGGCCNNNNNNNN
chr3	chr3	9	GTGAGCCACCGTGCCTGGCCCAGAATAA	1	82489981	82490009	GTGAGCCACTGTGCCTGGCCNNNNNNNN
chr3	chr3	9	GTGAGCCACTGTGCCCAGCCTAGGATTT	2	71266503	71266531	GTGAGCCACTGTGCCTGGCCNNNNNNNN
chr3	chr3	9	GTGAGCCATTGTGCCTGGCCTCGGATTT	1	2831394	2831422	GTGAGCCACTGTGCCTGGCCNNNNNNNN
chr3	chr3	9	ATGAGCCACTGTGCCTAGCCAAGAGGCA	2	183932123	183932151	GTGAGCCACTGTGCCTGGCCNNNNNNNN
chr3	chr3	9	GTGAGCCACTGCGCCTGGCCAGGGGGCA	1	13845513	13845541	GTGAGCCACTGTGCCTGGCCNNNNNNNN
chr3	chr3	9	ATGAGTCACTGTGCCTGGCCTAGAATTC	2	135791143	135791171	GTGAGCCACTGTGCCTGGCCNNNNNNNN
chr3	chr3	9	GTGAGCCGCTGTGCCTGGCCAAGGAATG	1	127363228	127363256	GTGAGCCACTGTGCCTGGCCNNNNNNNN
chr3	chr3	9	GTGAGCCACTGTGCCCAGTCGGGAGTGT	3	11791649	11791677	GTGAGCCACTGTGCCTGGCCNNNNNNNN
chr3	chr3	9	ATGAGCCACCGTGCCTGGCCAGGAATTT	2	113508174	113508202	GTGAGCCACTGTGCCTGGCCNNNNNNNN
chr3	chr3	9	GTGAGCCACCGTGCCTGGCCCTGAATAA	1	113409744	113409772	GTGAGCCACTGTGCCTGGCCNNNNNNNN
chr3	chr3	9	GTGAGCCACCGCGCCTGGCCTGGGGTTT	2	10178692	10178720	GTGAGCCACTGTGCCTGGCCNNNNNNNN
chr2	chr2	9	GTGAGCCACTGTGCCCAGCCGGGAGGAT	2	85643119	85643147	GTGAGCCACTGTGCCTGGCCNNNNNNNN
chr2	chr2	9	GTGAGCCACCGTGCCCGGCCAAGAGTAT	2	81236875	81236903	GTGAGCCACTGTGCCTGGCCNNNNNNNN
chr2	chr2	9	ATGAGCCACTGTGCCTGGCCAAGAAATC	1	72470134	72470162	GTGAGCCACTGTGCCTGGCCNNNNNNNN
chr2	chr2	9	ATGAGCCACTGTGCCTGGCCTTGGGTAT	1	38821800	38821828	GTGAGCCACTGTGCCTGGCCNNNNNNNN
chr2	chr2	9	GTGAGCCACTGTGCTTGGCCTAGAGTAG	1	30706063	30706091	GTGAGCCACTGTGCCTGGCCNNNNNNNN
chr2	chr2	9	GTGAGCCACTGTGCCCAGCCATGAATGG	2	25542918	25542946	GTGAGCCACTGTGCCTGGCCNNNNNNNN
chr22	chr22	9	ATGAGCCATTGTGCCCGGCCATGAGTTT	3	36067285	36067313	GTGAGCCACTGTGCCTGGCCNNNNNNNN
chr2	chr2	9	GTGAGCCACTGCGCCCGGCCAGGGGTAG	2	228522555	228522583	GTGAGCCACTGTGCCTGGCCNNNNNNNN
chr2	chr2	9	GTGAGCCACCGTGCCTGGCCAAGAGGCT	1	219231127	219231155	GTGAGCCACTGTGCCTGGCCNNNNNNNN
chr22	chr22	9	GTGAGCCACTGTGCCCGGCCAAGAAATA	1	19192729	19192757	GTGAGCCACTGTGCCTGGCCNNNNNNNN
chr2	chr2	9	ATGAGCCACCGTGCCTGGCCATGAATTA	2	202176154	202176182	GTGAGCCACTGTGCCTGGCCNNNNNNNN
chr2	chr2	9	GTGAGCCACTGCGCCTGGCCCAGAATTC	1	197977143	197977171	GTGAGCCACTGTGCCTGGCCNNNNNNNN
chr2	chr2	9	GTGAGCCACTGCGCCTGGCCCAGGATGG	1	18596639	18596667	GTGAGCCACTGTGCCTGGCCNNNNNNNN
chr2	chr2	9	ATGAGCCACTGTGCCTGGCCTGGATTAG	1	162132635	162132663	GTGAGCCACTGTGCCTGGCCNNNNNNNN
chr2	chr2	9	GTGAGCCACCGTGCCTAGCCAGGAATCC	2	15259742	15259770	GTGAGCCACTGTGCCTGGCCNNNNNNNN
chr21	chr21	9	ATGAGCCAATGTGCCTGGCCAAGAGTTG	2	44335007	44335035	GTGAGCCACTGTGCCTGGCCNNNNNNNN
chr20	chr20	9	GTGAGCCACTGTGCCTGGCCCAGACTTA	0	5888464	5888492	GTGAGCCACTGTGCCTGGCCNNNNNNNN
chr20	chr20	9	GTGAGCCACTGTGCCTGGCCCTGCATCT	0	49334617	49334645	GTGAGCCACTGTGCCTGGCCNNNNNNNN
chr20	chr20	9	GTGAGCCACTGTGCTTGGCCGGGAGTAA	1	46257435	46257463	GTGAGCCACTGTGCCTGGCCNNNNNNNN
chr20	chr20	9	GTGAGCCACTGCGCCTGGCCTGGGGAAA	1	3032928	3032956	GTGAGCCACTGTGCCTGGCCNNNNNNNN
chr20	chr20	9	GTGAGCCACTGTGCCTGGCCAGGATCTT	0	2629845	2629873	GTGAGCCACTGTGCCTGGCCNNNNNNNN
chr20	chr20	9	GTGAGCCACCGTGCCTGGCCAAGAGTGA	1	19152622	19152650	GTGAGCCACTGTGCCTGGCCNNNNNNNN
chr19	chr19	9	GTGAGCCACCGCGCCTGGCCGAGAGTGT	2	7833171	7833199	GTGAGCCACTGTGCCTGGCCNNNNNNNN
chr19	chr19	9	GTGAGCCACCGTGCCTGGCCGAGGGGCC	1	6164719	6164747	GTGAGCCACTGTGCCTGGCCNNNNNNNN
chr19	chr19	9	GTGAGCCACTGTGCCCAGCCCAGAATAA	2	6154802	6154830	GTGAGCCACTGTGCCTGGCCNNNNNNNN
chr19	chr19	9	GTGAGCCACTGTGCCCAGCCGAGAATCT	2	56648431	56648459	GTGAGCCACTGTGCCTGGCCNNNNNNNN
chr1	chr1	9	ATGAGCCACTGTGCCCAGCCCGGAATTC	3	9515187	9515215	GTGAGCCACTGTGCCTGGCCNNNNNNNN
chr19	chr19	9	GTGAGCCACTGCGCCTGGCCAGGGATTA	1	49970557	49970585	GTGAGCCACTGTGCCTGGCCNNNNNNNN
chr19	chr19	9	ATGAGCCACTGTGCCCAGCCAAGGGGTG	3	47529111	47529139	GTGAGCCACTGTGCCTGGCCNNNNNNNN
chr1	chr1	9	GTGAGCCACTGCGCCCAGCCCAGAGTTT	3	94281939	94281967	GTGAGCCACTGTGCCTGGCCNNNNNNNN
chr19	chr19	9	GTGAGCCACTGCGCCCAGCCAGGAGTCT	3	34133548	34133576	GTGAGCCACTGTGCCTGGCCNNNNNNNN
chr19	chr19	9	GTGAGCCACTATGCCTGGCCAGGAATGT	1	22433793	22433821	GTGAGCCACTGTGCCTGGCCNNNNNNNN
chr19	chr19	9	GTGAGCCACTGTGCCCAGCCACAGGTCC	2	18490420	18490448	GTGAGCCACTGTGCCTGGCCNNNNNNNN
chr19	chr19	9	ATGAGCCACTGTGCCTGGCCTGGAAATA	1	15130509	15130537	GTGAGCCACTGTGCCTGGCCNNNNNNNN
chr19	chr19	9	GTGAGCCACTGTGCCTGGCCAGGAGCAG	0	14845518	14845546	GTGAGCCACTGTGCCTGGCCNNNNNNNN
chr19	chr19	9	GTGAGCCACTATGCCTGGCCAGGGGGCT	1	11339517	11339545	GTGAGCCACTGTGCCTGGCCNNNNNNNN
chr1	chr1	9	ATGAGCCACTGTGCCAGGCCAAGAGTAA	2	90578777	90578805	GTGAGCCACTGTGCCTGGCCNNNNNNNN
chr18	chr18	9	GTGAGCCACTGCGCCTGGCCAAGAGATT	1	77175771	77175799	GTGAGCCACTGTGCCTGGCCNNNNNNNN
chr18	chr18	9	ATGAGTCACTGTGCCCAGCCGAGAGTCT	4	66373335	66373363	GTGAGCCACTGTGCCTGGCCNNNNNNNN
chr18	chr18	9	GTGAGTCACTGTGCCTGGCCAAGGATCC	1	57581182	57581210	GTGAGCCACTGTGCCTGGCCNNNNNNNN
chr1	chr1	9	GTGAGCCACTGTGCCTGGCCCAGATTGG	0	85682342	85682370	GTGAGCCACTGTGCCTGGCCNNNNNNNN
chr18	chr18	9	GTGAGCCACTGCGCCTGGCCTAGGACCC	1	19394814	19394842	GTGAGCCACTGTGCCTGGCCNNNNNNNN
chr17	chr17	9	GTGAGCCACCGTGCCTGGTCTTGGGCTT	2	70832759	70832787	GTGAGCCACTGTGCCTGGCCNNNNNNNN
chr17	chr17	9	GTGAGCCACTGTGCCCAGCCAAGAATTA	2	60808905	60808933	GTGAGCCACTGTGCCTGGCCNNNNNNNN
chr17	chr17	9	GTGAGCCACTGCGCCTGGCCAAGAACAG	1	60252245	60252273	GTGAGCCACTGTGCCTGGCCNNNNNNNN
chr17	chr17	9	GTGAGCCACTGTGCCTGGCCAAGGCTCT	0	48240502	48240530	GTGAGCCACTGTGCCTGGCCNNNNNNNN
chr17	chr17	9	ATGAGCCACTGTGCCTGGCCTAGAAGCC	1	42126267	42126295	GTGAGCCACTGTGCCTGGCCNNNNNNNN
chr17	chr17	9	ATGAGCCACTGTGCCTGGCCAAGGGGAG	1	40561398	40561426	GTGAGCCACTGTGCCTGGCCNNNNNNNN
chr17	chr17	9	ATGAGCCACTGTGCCTGGCCATGGAAAA	1	26196076	26196104	GTGAGCCACTGTGCCTGGCCNNNNNNNN
chr16	chr16	9	GTGAGCCACTGTGCCTGGCCACGAGAAA	0	84191522	84191550	GTGAGCCACTGTGCCTGGCCNNNNNNNN
chr1	chr1	9	GTGAGCCACTGTGCCTGGCCTCGACCAT	0	68180879	68180907	GTGAGCCACTGTGCCTGGCCNNNNNNNN
chr16	chr16	9	GTAAGCCACTGTGCCCGGCCTGGAGTTT	2	81094194	81094222	GTGAGCCACTGTGCCTGGCCNNNNNNNN
chr1	chr1	9	GTGAGCCACTGCGCCCGGCCTTGAGTAA	2	67619730	67619758	GTGAGCCACTGTGCCTGGCCNNNNNNNN
chr16	chr16	9	GTGAGCCACTGCGCCTGGCCGAGAATAG	1	53194528	53194556	GTGAGCCACTGTGCCTGGCCNNNNNNNN
chr16	chr16	9	GTGAGCCACTGTGCCCGGCCAGGAAGAG	1	34273199	34273227	GTGAGCCACTGTGCCTGGCCNNNNNNNN
chr16	chr16	9	GTGAGCCACCGCGCCTGGCCTAGGATTT	2	11833759	11833787	GTGAGCCACTGTGCCTGGCCNNNNNNNN
chr15	chr15	9	ATGAGCCACTGTGCCTGGCCAGGGGACA	1	96825561	96825589	GTGAGCCACTGTGCCTGGCCNNNNNNNN
chr15	chr15	9	GTGAGCCACTGTGCCCAGCCAAGAAATA	2	72478943	72478971	GTGAGCCACTGTGCCTGGCCNNNNNNNN
chr15	chr15	9	GTGAGCCACTGTGCCTGGCCCAGATATT	0	55363649	55363677	GTGAGCCACTGTGCCTGGCCNNNNNNNN
chr15	chr15	9	ATGAGCCACTGCGCCCAGCCAAGAGTCT	4	52798120	52798148	GTGAGCCACTGTGCCTGGCCNNNNNNNN
chr15	chr15	9	GTGAGCCACTGTGCCTGGCCGAGAAAGG	0	52126737	52126765	GTGAGCCACTGTGCCTGGCCNNNNNNNN
chr15	chr15	9	GTGAGCCACTGTGCCTGGCCTGGAACTT	0	44825008	44825036	GTGAGCCACTGTGCCTGGCCNNNNNNNN
chr15	chr15	9	GTGAGCCACCGTGCCAGGCCTGGAGTCT	2	40193984	40194012	GTGAGCCACTGTGCCTGGCCNNNNNNNN
chr14	chr14	9	GTGAGCCACTGTGCCCGGCCATGAATTT	1	96233026	96233054	GTGAGCCACTGTGCCTGGCCNNNNNNNN
chr14	chr14	9	GTGAGCCACTGTGCCTGGCCTTGCATTT	0	94106684	94106712	GTGAGCCACTGTGCCTGGCCNNNNNNNN
chr14	chr14	9	GTGAGCCACCGCGCCTGGCCGAGAATTT	2	75270570	75270598	GTGAGCCACTGTGCCTGGCCNNNNNNNN
chr14	chr14	9	GTGAGCCACTATGCCTGGCCTAGAGTTA	1	51234245	51234273	GTGAGCCACTGTGCCTGGCCNNNNNNNN
chr14	chr14	9	GTGAGCCACTGTGCCCGGCCTAGGATGT	1	50325967	50325995	GTGAGCCACTGTGCCTGGCCNNNNNNNN
chr1	chr1	9	GTGAGCCACTGCGCCTGGCCGGGAATGA	1	44614148	44614176	GTGAGCCACTGTGCCTGGCCNNNNNNNN
chr14	chr14	9	ATGAGCCACTGCGCCTGGCCGGGAGTTC	2	39549889	39549917	GTGAGCCACTGTGCCTGGCCNNNNNNNN
chr14	chr14	9	GTGAGCCAGTGTGCCTGGCCTGGAAGCT	1	35866059	35866087	GTGAGCCACTGTGCCTGGCCNNNNNNNN
chr14	chr14	9	GTGAGCCACCGTGCCCGGCCATGAATTA	2	31227322	31227350	GTGAGCCACTGTGCCTGGCCNNNNNNNN
chr13	chr13	9	GTGAGCCACTGTGCCCGGCCTAGAAATG	1	98988805	98988833	GTGAGCCACTGTGCCTGGCCNNNNNNNN
chr13	chr13	9	GTGAGCCACTGCGCCTGGCCCAGAAATT	1	95389448	95389476	GTGAGCCACTGTGCCTGGCCNNNNNNNN
chr1	chr1	9	ATGAGCCACTGTGCCCAGCCAAGAATCT	3	38420928	38420956	GTGAGCCACTGTGCCTGGCCNNNNNNNN
chr13	chr13	9	GTGAGCCACTGCACCTGGCCTGGGGTTT	2	46113308	46113336	GTGAGCCACTGTGCCTGGCCNNNNNNNN
chr13	chr13	9	GTGAGCCACTGTGCCTGGCCAGGATTTT	0	21339110	21339138	GTGAGCCACTGTGCCTGGCCNNNNNNNN
chr12	chr12	9	GTGAGCCACCGTGCCCAGCCAAGAATCG	3	83581830	83581858	GTGAGCCACTGTGCCTGGCCNNNNNNNN
chr1	chr1	9	GTGAGCCACTGTGCCTGGCCTCGATTTC	0	28173727	28173755	GTGAGCCACTGTGCCTGGCCNNNNNNNN
chr12	chr12	9	GTGAGCCACCATGCCTGGCCTAGAGTGC	2	77303188	77303216	GTGAGCCACTGTGCCTGGCCNNNNNNNN
chr1	chr1	9	ATGAGCCACTGTGCCTGGCCTTGAAACT	1	27128788	27128816	GTGAGCCACTGTGCCTGGCCNNNNNNNN
chr12	chr12	9	GTGAGCCACTGTGCCTGGCCATGAGCGC	0	69359662	69359690	GTGAGCCACTGTGCCTGGCCNNNNNNNN
chr12	chr12	9	GTGAGCCACCGTGCCCGGCCAAGGGTTT	2	68202771	68202799	GTGAGCCACTGTGCCTGGCCNNNNNNNN
chr12	chr12	9	GTGAGCCACTGCGCCCAGCCTGGAATTC	3	6677809	6677837	GTGAGCCACTGTGCCTGGCCNNNNNNNN
chr12	chr12	9	ATGAGCCACTGTGCCTGGCCAAGAAACA	1	60008097	60008125	GTGAGCCACTGTGCCTGGCCNNNNNNNN
chr12	chr12	9	GTGAGCCACTGTGCCTGGCCAAGATTAG	0	56669068	56669096	GTGAGCCACTGTGCCTGGCCNNNNNNNN
chr1	chr1	9	GTGAGCCACTGCGCCTGGCCAAGGGAAG	1	25056147	25056175	GTGAGCCACTGTGCCTGGCCNNNNNNNN
chr12	chr12	9	GTGAGCCACTGCGCCCAGCCAAGAGTTC	3	48494123	48494151	GTGAGCCACTGTGCCTGGCCNNNNNNNN
chr12	chr12	9	GTGAGCCACTGTGCCCGGCCTAGAGGGT	1	48355683	48355711	GTGAGCCACTGTGCCTGGCCNNNNNNNN
chr12	chr12	9	ATGAGCCACTGTGCCTGGCCTAGAGGTA	1	48327685	48327713	GTGAGCCACTGTGCCTGGCCNNNNNNNN
chr12	chr12	9	GTGAGTCACTATGCCTGGCCTTGAATCC	2	4531593	4531621	GTGAGCCACTGTGCCTGGCCNNNNNNNN
chr1	chr1	9	ATGAGCCACTGTGCCTGGCCTGGAAGAT	1	242715214	242715242	GTGAGCCACTGTGCCTGGCCNNNNNNNN
chr1	chr1	9	GTGAGCCACTGTGCCTGGCCTTGATTCT	0	240888135	240888163	GTGAGCCACTGTGCCTGGCCNNNNNNNN
chr1	chr1	9	GTGAGCCACCGTGCCTGGCCTTGAAACC	1	234958550	234958578	GTGAGCCACTGTGCCTGGCCNNNNNNNN
chr12	chr12	9	GTGAGCCACTGTGCCTTGCCAGAAGTCA	1	19601120	19601148	GTGAGCCACTGTGCCTGGCCNNNNNNNN
chr1	chr1	9	GTGAGCCACTGTGCCTGGCCCTGGGAAC	0	218203793	218203821	GTGAGCCACTGTGCCTGGCCNNNNNNNN
chr12	chr12	9	ATGAGCCACTGTGCCCAGCCTGGAATAC	3	1384363	1384391	GTGAGCCACTGTGCCTGGCCNNNNNNNN
chr12	chr12	9	GTGAGCCACTGTGCCTGGCCGGGATACT	0	121407548	121407576	GTGAGCCACTGTGCCTGGCCNNNNNNNN
chr12	chr12	9	ATGAGCCACTGCGCCTGGCCAGGAGCTG	2	120383800	120383828	GTGAGCCACTGTGCCTGGCCNNNNNNNN
chr12	chr12	9	GTGAGCCACTGTGCCCAGCCTAGGATTA	2	120364767	120364795	GTGAGCCACTGTGCCTGGCCNNNNNNNN
chr12	chr12	9	GTGAGCCACCGTGCCTGGCCTAGAATAC	1	10330825	10330853	GTGAGCCACTGTGCCTGGCCNNNNNNNN
chr1	chr1	9	ATGAGCCACCGTGCCTGGCCAAGAATTT	2	208050675	208050703	GTGAGCCACTGTGCCTGGCCNNNNNNNN
chr1	chr1	9	GTGAGCCACCGTGCCTGGCCTAGAGCCT	1	20197546	20197574	GTGAGCCACTGTGCCTGGCCNNNNNNNN
chr11	chr11	9	GTGAGCCACTGTGCCCGGCCCAGAGCTA	1	98184876	98184904	GTGAGCCACTGTGCCTGGCCNNNNNNNN
chr1	chr1	9	ATGAGCCACCATGCCTGGCCAAGAGTGT	3	184875080	184875108	GTGAGCCACTGTGCCTGGCCNNNNNNNN
chr1	chr1	9	GTGAGCCACTATACCCAGCCATGAGTTT	4	183736060	183736088	GTGAGCCACTGTGCCTGGCCNNNNNNNN
chr11	chr11	9	ATGAGCCACTGTGCCTAGTCAAGAGTGA	3	77514472	77514500	GTGAGCCACTGTGCCTGGCCNNNNNNNN
chr11	chr11	9	GTGAGTCACTGTGCCTGGCCAAGAATTG	1	63574615	63574643	GTGAGCCACTGTGCCTGGCCNNNNNNNN
chr11	chr11	9	GTGAGCCACTGTGCCCGGCCAGGAATCC	1	63466469	63466497	GTGAGCCACTGTGCCTGGCCNNNNNNNN
chr1	chr1	9	GTGAGCCACCGCGCCTGGCCAGGAGATT	2	161961234	161961262	GTGAGCCACTGTGCCTGGCCNNNNNNNN
chr1	chr1	9	GTGAGCCACTGTGCCCAGCCCAGGAATA	2	161242059	161242087	GTGAGCCACTGTGCCTGGCCNNNNNNNN
chr1	chr1	9	GTGAGCCACTGTACCTGGCCAAGAAACT	1	157967939	157967967	GTGAGCCACTGTGCCTGGCCNNNNNNNN
chr1	chr1	9	GTGAGCCACCATGCCTGGCCATGAGTTT	2	1515355	1515383	GTGAGCCACTGTGCCTGGCCNNNNNNNN
chr11	chr11	9	GTGAGCCACTGTGCCTGGCCAAGAAATT	0	47809244	47809272	GTGAGCCACTGTGCCTGGCCNNNNNNNN
chr11	chr11	9	GTGAGCCACCGTGCCTGGCCAGGAATAA	1	46493455	46493483	GTGAGCCACTGTGCCTGGCCNNNNNNNN
chr1	chr1	9	GTGAGCCACTGTGCCCAGCCCAGAATCT	2	143536686	143536714	GTGAGCCACTGTGCCTGGCCNNNNNNNN
chr11	chr11	9	GTGAGCCACTGTGCCTGGCCTCAGGTGA	0	34003218	34003246	GTGAGCCACTGTGCCTGGCCNNNNNNNN
chr11	chr11	9	ATGAGCCACTGTGCCTGGCCTAGAAATA	1	33815608	33815636	GTGAGCCACTGTGCCTGGCCNNNNNNNN
chr11	chr11	9	GTGAGCCACCATGCCCAGCCTAGAGTTT	4	117023498	117023526	GTGAGCCACTGTGCCTGGCCNNNNNNNN
chr10	chr10	9	GTGAGCCACTGTGCCTGGCCCCGACAAT	0	97398795	97398823	GTGAGCCACTGTGCCTGGCCNNNNNNNN
chr10	chr10	9	ATGAGCCACTGTGCCCGGCCTAGAGTTG	2	93041951	93041979	GTGAGCCACTGTGCCTGGCCNNNNNNNN
chr10	chr10	9	GTGAGCCACCATGCCTGGCCACGAATTT	2	7412108	7412136	GTGAGCCACTGTGCCTGGCCNNNNNNNN
chr10	chr10	9	GTGAGCCACTGCGCCCAGCCATGGGTGG	3	65362783	65362811	GTGAGCCACTGTGCCTGGCCNNNNNNNN
[truncated: 2,769 more rows]

## Sheet: Tab_S3_FnCas12a_Rep-1RC_PAM
#BED_Chromosome	bi.sum.mi	Site_SubstitutionsOnly.NumSubstitutions	Site_SubstitutionsOnly.Start	Site_SubstitutionsOnly.End	TargetSequence
chr13	17	0	87863583	87863609	NNNNNNNNGGCCAGGCACAGTGGCTCAC
chr22	16	1	31787796	31787822	NNNNNNNNGGCCAGGCACAGTGGCTCAC
chr18	14	1	27942914	27942940	NNNNNNNNGGCCAGGCACAGTGGCTCAC
chr1	13	0	226862177	226862203	NNNNNNNNGGCCAGGCACAGTGGCTCAC
chr3	13	0	47715421	47715447	NNNNNNNNGGCCAGGCACAGTGGCTCAC
chr13	12	0	70414635	70414661	NNNNNNNNGGCCAGGCACAGTGGCTCAC
chr22	12	2	30461571	30461597	NNNNNNNNGGCCAGGCACAGTGGCTCAC
chr22	12	1	38703974	38704000	NNNNNNNNGGCCAGGCACAGTGGCTCAC
chr1	11	0	156896647	156896673	NNNNNNNNGGCCAGGCACAGTGGCTCAC
chr1	11	1	226089243	226089269	NNNNNNNNGGCCAGGCACAGTGGCTCAC
chr22	11	0	38542333	38542359	NNNNNNNNGGCCAGGCACAGTGGCTCAC
chrX	11	1	103690096	103690122	NNNNNNNNGGCCAGGCACAGTGGCTCAC
chrX	11	0	49937868	49937894	NNNNNNNNGGCCAGGCACAGTGGCTCAC
chr12	10	1	49823518	49823544	NNNNNNNNGGCCAGGCACAGTGGCTCAC
chr1	10	1	145633770	145633796	NNNNNNNNGGCCAGGCACAGTGGCTCAC
chr1	10	1	149869389	149869415	NNNNNNNNGGCCAGGCACAGTGGCTCAC
chr1	10	1	156069386	156069412	NNNNNNNNGGCCAGGCACAGTGGCTCAC
chr1	10	1	245279469	245279495	NNNNNNNNGGCCAGGCACAGTGGCTCAC
chr20	10	1	12706761	12706787	NNNNNNNNGGCCAGGCACAGTGGCTCAC
chr20	10	0	5888466	5888492	NNNNNNNNGGCCAGGCACAGTGGCTCAC
chr22	10	1	37818456	37818482	NNNNNNNNGGCCAGGCACAGTGGCTCAC
chr22	10	0	40339988	40340014	NNNNNNNNGGCCAGGCACAGTGGCTCAC
chr5	10	1	51736848	51736874	NNNNNNNNGGCCAGGCACAGTGGCTCAC
chr6	10	1	13608272	13608298	NNNNNNNNGGCCAGGCACAGTGGCTCAC
chr8	10	1	144391147	144391173	NNNNNNNNGGCCAGGCACAGTGGCTCAC
chr9	10	0	81805511	81805537	NNNNNNNNGGCCAGGCACAGTGGCTCAC
chr9	10	0	81822107	81822133	NNNNNNNNGGCCAGGCACAGTGGCTCAC
chrX	10	0	114587619	114587645	NNNNNNNNGGCCAGGCACAGTGGCTCAC
chr11	9	1	77343061	77343087	NNNNNNNNGGCCAGGCACAGTGGCTCAC
chr13	9	1	86054725	86054751	NNNNNNNNGGCCAGGCACAGTGGCTCAC
chr17	9	2	29128218	29128244	NNNNNNNNGGCCAGGCACAGTGGCTCAC
chr17	9	0	60114331	60114357	NNNNNNNNGGCCAGGCACAGTGGCTCAC
chr17	9	1	66025121	66025147	NNNNNNNNGGCCAGGCACAGTGGCTCAC
chr18	9	1	21899820	21899846	NNNNNNNNGGCCAGGCACAGTGGCTCAC
chr18	9	0	30284397	30284423	NNNNNNNNGGCCAGGCACAGTGGCTCAC
chr1	9	0	209027235	209027261	NNNNNNNNGGCCAGGCACAGTGGCTCAC
chr1	9	1	28796614	28796640	NNNNNNNNGGCCAGGCACAGTGGCTCAC
chr21	9	1	22266417	22266443	NNNNNNNNGGCCAGGCACAGTGGCTCAC
chr22	9	1	20060120	20060146	NNNNNNNNGGCCAGGCACAGTGGCTCAC
chr4	9	1	149500799	149500825	NNNNNNNNGGCCAGGCACAGTGGCTCAC
chr4	9	1	71861772	71861798	NNNNNNNNGGCCAGGCACAGTGGCTCAC
chr4	9	1	85798731	85798757	NNNNNNNNGGCCAGGCACAGTGGCTCAC
chr5	9	1	73881841	73881867	NNNNNNNNGGCCAGGCACAGTGGCTCAC
chr6	9	0	89197437	89197463	NNNNNNNNGGCCAGGCACAGTGGCTCAC
chr6	9	0	89714066	89714092	NNNNNNNNGGCCAGGCACAGTGGCTCAC
chr6	9	1	99879568	99879594	NNNNNNNNGGCCAGGCACAGTGGCTCAC
chr7	9	1	100501139	100501165	NNNNNNNNGGCCAGGCACAGTGGCTCAC
chr10	8	1	102353404	102353430	NNNNNNNNGGCCAGGCACAGTGGCTCAC
chr10	8	1	121496620	121496646	NNNNNNNNGGCCAGGCACAGTGGCTCAC
chr10	8	1	22649296	22649322	NNNNNNNNGGCCAGGCACAGTGGCTCAC
chr11	8	1	116975754	116975780	NNNNNNNNGGCCAGGCACAGTGGCTCAC
chr13	8	1	65781793	65781819	NNNNNNNNGGCCAGGCACAGTGGCTCAC
chr14	8	0	93662348	93662374	NNNNNNNNGGCCAGGCACAGTGGCTCAC
chr16	8	0	6040680	6040706	NNNNNNNNGGCCAGGCACAGTGGCTCAC
chr17	8	0	19757323	19757349	NNNNNNNNGGCCAGGCACAGTGGCTCAC
chr17	8	1	4808555	4808581	NNNNNNNNGGCCAGGCACAGTGGCTCAC
chr17	8	0	48868280	48868306	NNNNNNNNGGCCAGGCACAGTGGCTCAC
chr17	8	0	62337809	62337835	NNNNNNNNGGCCAGGCACAGTGGCTCAC
chr17	8	1	70529716	70529742	NNNNNNNNGGCCAGGCACAGTGGCTCAC
chr18	8	1	18598202	18598228	NNNNNNNNGGCCAGGCACAGTGGCTCAC
chr18	8	1	31006152	31006178	NNNNNNNNGGCCAGGCACAGTGGCTCAC
chr1	8	0	113141387	113141413	NNNNNNNNGGCCAGGCACAGTGGCTCAC
chr1	8	0	85682344	85682370	NNNNNNNNGGCCAGGCACAGTGGCTCAC
chr1	8	0	86250693	86250719	NNNNNNNNGGCCAGGCACAGTGGCTCAC
chr1	8	0	89266778	89266804	NNNNNNNNGGCCAGGCACAGTGGCTCAC
chr22	8	1	29072855	29072881	NNNNNNNNGGCCAGGCACAGTGGCTCAC
chr22	8	0	31902313	31902339	NNNNNNNNGGCCAGGCACAGTGGCTCAC
chr22	8	0	36898243	36898269	NNNNNNNNGGCCAGGCACAGTGGCTCAC
chr2	8	0	103193321	103193347	NNNNNNNNGGCCAGGCACAGTGGCTCAC
chr2	8	1	184245885	184245911	NNNNNNNNGGCCAGGCACAGTGGCTCAC
chr3	8	0	129391152	129391178	NNNNNNNNGGCCAGGCACAGTGGCTCAC
chr3	8	0	130864128	130864154	NNNNNNNNGGCCAGGCACAGTGGCTCAC
chr6	8	1	74130311	74130337	NNNNNNNNGGCCAGGCACAGTGGCTCAC
chr8	8	1	38818767	38818793	NNNNNNNNGGCCAGGCACAGTGGCTCAC
chr9	8	0	105367294	105367320	NNNNNNNNGGCCAGGCACAGTGGCTCAC
chr9	8	0	97600569	97600595	NNNNNNNNGGCCAGGCACAGTGGCTCAC
chrX	8	1	103524785	103524811	NNNNNNNNGGCCAGGCACAGTGGCTCAC
chrX	8	0	110651562	110651588	NNNNNNNNGGCCAGGCACAGTGGCTCAC
chr10	7	0	15202940	15202966	NNNNNNNNGGCCAGGCACAGTGGCTCAC
chr10	7	1	27805196	27805222	NNNNNNNNGGCCAGGCACAGTGGCTCAC
chr11	7	0	20441429	20441455	NNNNNNNNGGCCAGGCACAGTGGCTCAC
chr11	7	1	82984393	82984419	NNNNNNNNGGCCAGGCACAGTGGCTCAC
chr11	7	0	91608883	91608909	NNNNNNNNGGCCAGGCACAGTGGCTCAC
chr12	7	1	114008978	114009004	NNNNNNNNGGCCAGGCACAGTGGCTCAC
chr12	7	2	27171448	27171474	NNNNNNNNGGCCAGGCACAGTGGCTCAC
chr12	7	0	32740599	32740625	NNNNNNNNGGCCAGGCACAGTGGCTCAC
chr12	7	1	69092862	69092888	NNNNNNNNGGCCAGGCACAGTGGCTCAC
chr13	7	1	82936572	82936598	NNNNNNNNGGCCAGGCACAGTGGCTCAC
chr14	7	1	39646300	39646326	NNNNNNNNGGCCAGGCACAGTGGCTCAC
chr14	7	0	81493091	81493117	NNNNNNNNGGCCAGGCACAGTGGCTCAC
chr16	7	0	21679707	21679733	NNNNNNNNGGCCAGGCACAGTGGCTCAC
chr16	7	0	22708928	22708954	NNNNNNNNGGCCAGGCACAGTGGCTCAC
chr16	7	0	73111983	73112009	NNNNNNNNGGCCAGGCACAGTGGCTCAC
chr17	7	1	40400007	40400033	NNNNNNNNGGCCAGGCACAGTGGCTCAC
chr17	7	0	47443755	47443781	NNNNNNNNGGCCAGGCACAGTGGCTCAC
chr17	7	1	58259835	58259861	NNNNNNNNGGCCAGGCACAGTGGCTCAC
chr17	7	1	73981508	73981534	NNNNNNNNGGCCAGGCACAGTGGCTCAC
chr19	7	1	36657219	36657245	NNNNNNNNGGCCAGGCACAGTGGCTCAC
chr19	7	0	48062339	48062365	NNNNNNNNGGCCAGGCACAGTGGCTCAC
chr19	7	1	5266420	5266446	NNNNNNNNGGCCAGGCACAGTGGCTCAC
chr19	7	1	626498	626524	NNNNNNNNGGCCAGGCACAGTGGCTCAC
chr19	7	1	7583208	7583234	NNNNNNNNGGCCAGGCACAGTGGCTCAC
chr1	7	0	1637791	1637817	NNNNNNNNGGCCAGGCACAGTGGCTCAC
chr1	7	1	174793139	174793165	NNNNNNNNGGCCAGGCACAGTGGCTCAC
chr1	7	0	206274977	206275003	NNNNNNNNGGCCAGGCACAGTGGCTCAC
chr1	7	1	229638433	229638459	NNNNNNNNGGCCAGGCACAGTGGCTCAC
chr1	7	0	36426120	36426146	NNNNNNNNGGCCAGGCACAGTGGCTCAC
chr1	7	1	53202540	53202566	NNNNNNNNGGCCAGGCACAGTGGCTCAC
chr1	7	1	62471147	62471173	NNNNNNNNGGCCAGGCACAGTGGCTCAC
chr1	7	1	67478941	67478967	NNNNNNNNGGCCAGGCACAGTGGCTCAC
chr20	7	0	3133265	3133291	NNNNNNNNGGCCAGGCACAGTGGCTCAC
chr22	7	0	41401599	41401625	NNNNNNNNGGCCAGGCACAGTGGCTCAC
chr2	7	0	140934162	140934188	NNNNNNNNGGCCAGGCACAGTGGCTCAC
chr2	7	1	177048476	177048502	NNNNNNNNGGCCAGGCACAGTGGCTCAC
chr2	7	1	202604759	202604785	NNNNNNNNGGCCAGGCACAGTGGCTCAC
chr2	7	0	225396084	225396110	NNNNNNNNGGCCAGGCACAGTGGCTCAC
chr3	7	1	12702914	12702940	NNNNNNNNGGCCAGGCACAGTGGCTCAC
chr3	7	1	15304176	15304202	NNNNNNNNGGCCAGGCACAGTGGCTCAC
chr3	7	2	38232836	38232862	NNNNNNNNGGCCAGGCACAGTGGCTCAC
chr3	7	1	9485459	9485485	NNNNNNNNGGCCAGGCACAGTGGCTCAC
chr5	7	0	157278408	157278434	NNNNNNNNGGCCAGGCACAGTGGCTCAC
chr6	7	0	109259674	109259700	NNNNNNNNGGCCAGGCACAGTGGCTCAC
chr6	7	0	136577553	136577579	NNNNNNNNGGCCAGGCACAGTGGCTCAC
chr6	7	1	13887609	13887635	NNNNNNNNGGCCAGGCACAGTGGCTCAC
chr6	7	0	167889767	167889793	NNNNNNNNGGCCAGGCACAGTGGCTCAC
chr6	7	0	35408402	35408428	NNNNNNNNGGCCAGGCACAGTGGCTCAC
chr7	7	0	148943760	148943786	NNNNNNNNGGCCAGGCACAGTGGCTCAC
chr7	7	1	87870890	87870916	NNNNNNNNGGCCAGGCACAGTGGCTCAC
chr8	7	1	119843059	119843085	NNNNNNNNGGCCAGGCACAGTGGCTCAC
chr8	7	1	42971690	42971716	NNNNNNNNGGCCAGGCACAGTGGCTCAC
chr8	7	1	79958039	79958065	NNNNNNNNGGCCAGGCACAGTGGCTCAC
chr8	7	1	99406620	99406646	NNNNNNNNGGCCAGGCACAGTGGCTCAC
chr9	7	1	126035335	126035361	NNNNNNNNGGCCAGGCACAGTGGCTCAC
chr9	7	0	128010099	128010125	NNNNNNNNGGCCAGGCACAGTGGCTCAC
chr9	7	1	36333737	36333763	NNNNNNNNGGCCAGGCACAGTGGCTCAC
chrX	7	1	103835005	103835031	NNNNNNNNGGCCAGGCACAGTGGCTCAC
chrX	7	0	12353526	12353552	NNNNNNNNGGCCAGGCACAGTGGCTCAC
chr10	6	1	101763700	101763726	NNNNNNNNGGCCAGGCACAGTGGCTCAC
chr10	6	1	111670014	111670040	NNNNNNNNGGCCAGGCACAGTGGCTCAC
chr10	6	1	15424494	15424520	NNNNNNNNGGCCAGGCACAGTGGCTCAC
chr10	6	1	73948870	73948896	NNNNNNNNGGCCAGGCACAGTGGCTCAC
chr11	6	0	101969092	101969118	NNNNNNNNGGCCAGGCACAGTGGCTCAC
chr11	6	0	126665558	126665584	NNNNNNNNGGCCAGGCACAGTGGCTCAC
chr11	6	0	18449503	18449529	NNNNNNNNGGCCAGGCACAGTGGCTCAC
chr11	6	1	32934166	32934192	NNNNNNNNGGCCAGGCACAGTGGCTCAC
chr11	6	1	3646297	3646323	NNNNNNNNGGCCAGGCACAGTGGCTCAC
chr11	6	0	46775826	46775852	NNNNNNNNGGCCAGGCACAGTGGCTCAC
chr11	6	1	66431079	66431105	NNNNNNNNGGCCAGGCACAGTGGCTCAC
chr12	6	1	101891861	101891887	NNNNNNNNGGCCAGGCACAGTGGCTCAC
chr12	6	0	129383001	129383027	NNNNNNNNGGCCAGGCACAGTGGCTCAC
chr12	6	0	22608898	22608924	NNNNNNNNGGCCAGGCACAGTGGCTCAC
chr12	6	0	32917980	32918006	NNNNNNNNGGCCAGGCACAGTGGCTCAC
chr12	6	1	44119470	44119496	NNNNNNNNGGCCAGGCACAGTGGCTCAC
chr12	6	0	52383348	52383374	NNNNNNNNGGCCAGGCACAGTGGCTCAC
chr12	6	1	58099586	58099612	NNNNNNNNGGCCAGGCACAGTGGCTCAC
chr13	6	0	52730122	52730148	NNNNNNNNGGCCAGGCACAGTGGCTCAC
chr13	6	0	57046326	57046352	NNNNNNNNGGCCAGGCACAGTGGCTCAC
chr13	6	0	92827385	92827411	NNNNNNNNGGCCAGGCACAGTGGCTCAC
chr14	6	0	89856275	89856301	NNNNNNNNGGCCAGGCACAGTGGCTCAC
chr15	6	1	70600033	70600059	NNNNNNNNGGCCAGGCACAGTGGCTCAC
chr15	6	0	75423295	75423321	NNNNNNNNGGCCAGGCACAGTGGCTCAC
chr15	6	0	82454330	82454356	NNNNNNNNGGCCAGGCACAGTGGCTCAC
chr15	6	2	85322862	85322888	NNNNNNNNGGCCAGGCACAGTGGCTCAC
chr16	6	0	10908960	10908986	NNNNNNNNGGCCAGGCACAGTGGCTCAC
chr16	6	1	16290828	16290854	NNNNNNNNGGCCAGGCACAGTGGCTCAC
chr16	6	0	31024398	31024424	NNNNNNNNGGCCAGGCACAGTGGCTCAC
chr16	6	0	4182231	4182257	NNNNNNNNGGCCAGGCACAGTGGCTCAC
chr16	6	0	7236870	7236896	NNNNNNNNGGCCAGGCACAGTGGCTCAC
chr16	6	1	76793266	76793292	NNNNNNNNGGCCAGGCACAGTGGCTCAC
chr17	6	1	78116556	78116582	NNNNNNNNGGCCAGGCACAGTGGCTCAC
[truncated: 376 more rows]

## Sheet: Tab_S7_RuCas12a_validate_sites 
Supplementary Table 7. Validation of RuCas12a activities across human endogenous target sites, with spacer and primer sequences.
[truncated: 48 more rows]

[truncated: 3 more sheets: Tab_S8_TiCas9_validate_sites, Tab_S9_TiCas9_K1315_variants, Tab_S10_IC-GUIDE-seq]
